# Supplementary material
Source: MDPI journal article supplement (https://www.mdpi.com/2311-7524/7/5/114)
Supplement: s1 [file s1]

**Table 1.** Primer sequences used for qRT-PCR.

| Gene ID                        | Forward Primer Sequence<br>(5'-3') | Reverse Primer Sequence<br>(5'-3') |
|--------------------------------|------------------------------------|------------------------------------|
| GAPDH                          | GTACGACAACGAATGGGG<br>TTA          | TCATATCAGCAGCACCAG<br>CA           |
| <i>Sme2.5_01907.1_g00015.1</i> | AACCAGACAGCAAGAATC<br>A            | CAACCAACATCACCATTA<br>GG           |
| <i>Sme2.5_00108.1_g00003.1</i> | TCACTACTAATCCTCAACT<br>CC          | AATTCCTACCACTCAATGC<br>T           |
| <i>Sme2.5_04516.1_g00001.1</i> | GGATTCGGAGAGCATACG                 | GGTGAGGTGATACTGGAA<br>C            |
| <i>Sme2.5_00538.1_g00012.1</i> | TTCACTGCCAATCAATCCA                | TTCCAACCAACTTCCTGTA<br>A           |

**Table 2.** Pearson correlation coefficient analysis of WT and *dwf* RNA-seq samples.

|              | <i>dwf-1</i> | <i>dwf-2</i> | <i>dwf-3</i> | WT-1  | WT-2  | WT-3  |
|--------------|--------------|--------------|--------------|-------|-------|-------|
| <i>dwf-1</i> | 1            | 0.979        | 0.988        | 0.907 | 0.941 | 0.93  |
| <i>dwf-2</i> | 0.979        | 1            | 0.986        | 0.921 | 0.955 | 0.943 |
| <i>dwf-3</i> | 0.988        | 0.986        | 1            | 0.915 | 0.949 | 0.938 |
| WT-1         | 0.907        | 0.921        | 0.915        | 1     | 0.961 | 0.984 |
| WT-2         | 0.941        | 0.955        | 0.949        | 0.961 | 1     | 0.981 |
| WT-3         | 0.93         | 0.943        | 0.938        | 0.984 | 0.981 | 1     |
