# Supplementary material
Source: MDPI journal article supplement (https://www.mdpi.com/2311-7524/7/5/114)
Supplement: s1 [file s1]

Table S3 Expression Level of the DEGs

| gene_id                      | <i>dwf</i> -1 | <i>dwf</i> -2 | <i>dwf</i> -3 | WT-1    | WT-2    | WT-3    | log2FoldChange | pvalue     |
|------------------------------|---------------|---------------|---------------|---------|---------|---------|----------------|------------|
| gene:Sme2.5_03484.1_g00006.1 | 634.33        | 502.54        | 637.05        | 190.69  | 426.44  | 269.79  | 1.0002         | 9.50E-05   |
| gene:Sme2.5_01800.1_g00005.1 | 728.07        | 843.52        | 836.48        | 299.03  | 502.21  | 402.11  | 1.0007         | 9.08E-08   |
| gene:Sme2.5_00407.1_g00021.1 | 429.56        | 370.10        | 429.11        | 221.02  | 221.88  | 171.59  | 1.0007         | 5.61E-10   |
| gene:Sme2.5_06328.1_g00003.1 | 893.71        | 1120.62       | 1099.24       | 490.80  | 533.60  | 529.25  | 1.0027         | 2.77E-14   |
| gene:Sme2.5_05098.1_g00007.1 | 205.68        | 202.90        | 220.23        | 80.17   | 137.46  | 96.13   | 1.0033         | 5.70E-06   |
| gene:Sme2.5_04364.1_g00006.1 | 83.73         | 48.85         | 52.93         | 30.34   | 27.06   | 35.15   | 1.0033         | 0.00324548 |
| gene:Sme2.5_00009.1_g00015.1 | 231.16        | 192.56        | 222.12        | 108.34  | 107.15  | 106.47  | 1.0046         | 1.33E-08   |
| novel.1176                   | 847.29        | 812.52        | 917.77        | 410.62  | 467.57  | 406.24  | 1.0051         | 1.36E-16   |
| gene:Sme2.5_00569.1_g00005.1 | 2351.67       | 2225.27       | 2418.72       | 841.83  | 1455.76 | 1187.72 | 1.0052         | 3.75E-08   |
| gene:Sme2.5_02446.1_g00010.1 | 49.14         | 39.45         | 39.70         | 14.08   | 28.14   | 21.71   | 1.0052         | 0.00803959 |
| gene:Sme2.5_01216.1_g00004.1 | 420.46        | 382.31        | 441.40        | 172.27  | 250.02  | 197.44  | 1.0057         | 5.19E-09   |
| novel.533                    | 35.49         | 55.42         | 41.59         | 21.67   | 17.32   | 26.88   | 1.0057         | 0.00722004 |
| gene:Sme2.5_00985.1_g00007.1 | 82.82         | 68.57         | 87.90         | 33.59   | 37.88   | 47.55   | 1.0058         | 0.00030468 |
| gene:Sme2.5_00059.1_g00013.1 | 152.90        | 170.02        | 136.11        | 71.51   | 96.33   | 60.99   | 1.0058         | 1.60E-05   |
| gene:Sme2.5_04190.1_g00001.1 | 437.75        | 266.77        | 325.14        | 234.02  | 108.23  | 170.56  | 1.0059         | 0.00032441 |
| gene:Sme2.5_10351.1_g00001.1 | 2723.90       | 2389.66       | 2559.55       | 1035.77 | 1475.24 | 1308.66 | 1.0063         | 4.10E-12   |
| gene:Sme2.5_04084.1_g00003.1 | 2564.63       | 2013.93       | 2295.84       | 1263.29 | 1049.88 | 1108.12 | 1.0068         | 2.12E-14   |
| gene:Sme2.5_01750.1_g00006.1 | 331.27        | 247.04        | 326.09        | 174.43  | 132.05  | 143.68  | 1.0069         | 1.54E-07   |
| gene:Sme2.5_07837.1_g00001.1 | 296.69        | 320.31        | 295.84        | 104.01  | 224.05  | 126.11  | 1.0076         | 0.00011129 |
| gene:Sme2.5_02298.1_g00001.1 | 2486.37       | 2477.95       | 2650.28       | 1196.12 | 1297.73 | 1292.12 | 1.0080         | 1.79E-27   |
| gene:Sme2.5_01828.1_g00001.1 | 1073.91       | 943.09        | 996.22        | 502.72  | 529.27  | 466.20  | 1.0085         | 3.82E-18   |
| gene:Sme2.5_05942.1_g00005.1 | 241.17        | 175.65        | 173.91        | 88.84   | 116.89  | 87.86   | 1.0098         | 5.92E-06   |
| gene:Sme2.5_06133.1_g00001.1 | 228.43        | 194.44        | 208.88        | 100.76  | 120.14  | 93.03   | 1.0101         | 6.56E-08   |
| gene:Sme2.5_05841.1_g00003.1 | 357.67        | 362.58        | 338.37        | 160.35  | 188.33  | 176.76  | 1.0106         | 4.28E-12   |
| gene:Sme2.5_02676.1_g00005.1 | 1530.77       | 1496.35       | 1480.15       | 691.24  | 793.36  | 752.53  | 1.0106         | 3.69E-23   |
| gene:Sme2.5_05562.1_g00003.1 | 303.97        | 275.22        | 317.58        | 156.02  | 158.02  | 131.28  | 1.0108         | 4.67E-10   |
| gene:Sme2.5_14424.1_g00001.1 | 152.90        | 113.66        | 129.49        | 55.26   | 81.18   | 59.95   | 1.0130         | 3.28E-05   |
| gene:Sme2.5_01472.1_g00006.1 | 1004.74       | 683.83        | 854.44        | 464.80  | 398.30  | 396.94  | 1.0134         | 1.40E-09   |

|                              |          |          |          |         |          |         |        |            |
|------------------------------|----------|----------|----------|---------|----------|---------|--------|------------|
| gene:Sme2.5_05168.1_g00007.1 | 1343.29  | 1009.78  | 1198.49  | 424.71  | 741.41   | 592.31  | 1.0142 | 5.17E-07   |
| gene:Sme2.5_00008.1_g00043.1 | 435.93   | 312.80   | 369.57   | 160.35  | 217.55   | 175.73  | 1.0148 | 8.30E-08   |
| gene:Sme2.5_01158.1_g00003.1 | 89.19    | 104.27   | 99.24    | 37.92   | 53.03    | 53.75   | 1.0148 | 6.28E-05   |
| gene:Sme2.5_04691.1_g00002.1 | 541.50   | 367.28   | 550.09   | 223.19  | 239.20   | 259.46  | 1.0149 | 6.75E-08   |
| novel.2025                   | 131.05   | 109.90   | 95.46    | 47.67   | 71.43    | 47.55   | 1.0150 | 0.00012831 |
| gene:Sme2.5_12945.1_g00001.1 | 72.81    | 62.00    | 81.29    | 47.67   | 30.31    | 28.94   | 1.0167 | 0.00097869 |
| gene:Sme2.5_08775.1_g00001.1 | 161.09   | 171.90   | 204.16   | 68.26   | 101.74   | 95.10   | 1.0179 | 3.53E-06   |
| gene:Sme2.5_00779.1_g00009.1 | 80.09    | 66.69    | 51.98    | 27.09   | 42.21    | 28.94   | 1.0184 | 0.00175517 |
| gene:Sme2.5_00172.1_g00009.1 | 41.86    | 69.51    | 56.71    | 30.34   | 16.24    | 36.18   | 1.0194 | 0.00744237 |
| gene:Sme2.5_01633.1_g00010.1 | 1216.79  | 1144.11  | 1125.71  | 548.22  | 611.53   | 560.26  | 1.0196 | 1.44E-21   |
| gene:Sme2.5_01116.1_g00010.1 | 1720.98  | 823.79   | 1298.68  | 583.97  | 624.51   | 686.37  | 1.0203 | 9.62E-06   |
| gene:Sme2.5_03773.1_g00005.1 | 99.20    | 82.66    | 101.13   | 56.34   | 32.47    | 50.65   | 1.0203 | 0.00023771 |
| gene:Sme2.5_06075.1_g00009.1 | 933.75   | 984.42   | 915.88   | 386.79  | 555.24   | 453.79  | 1.0218 | 9.10E-12   |
| gene:Sme2.5_00931.1_g00014.1 | 93.74    | 119.30   | 107.75   | 52.01   | 58.45    | 47.55   | 1.0221 | 2.18E-05   |
| gene:Sme2.5_00310.1_g00015.1 | 797.24   | 503.48   | 640.83   | 264.36  | 396.14   | 295.64  | 1.0222 | 1.29E-06   |
| gene:Sme2.5_05331.1_g00002.1 | 115.58   | 123.05   | 149.34   | 35.75   | 96.33    | 58.92   | 1.0224 | 0.00179142 |
| novel.1318                   | 5033.71  | 3534.70  | 4433.84  | 2439.91 | 1873.54  | 2087.03 | 1.0226 | 1.15E-10   |
| novel.3065                   | 186.57   | 126.81   | 132.33   | 72.59   | 70.35    | 76.49   | 1.0227 | 1.32E-05   |
| gene:Sme2.5_05647.1_g00003.1 | 18881.63 | 18361.10 | 18559.55 | 7943.79 | 10506.34 | 9007.62 | 1.0231 | 1.55E-17   |
| gene:Sme2.5_00325.1_g00017.1 | 94.65    | 57.30    | 95.46    | 60.67   | 23.81    | 37.21   | 1.0243 | 0.00606709 |
| gene:Sme2.5_00169.1_g00002.1 | 2069.54  | 1662.62  | 1904.54  | 692.32  | 1126.72  | 952.03  | 1.0244 | 1.32E-08   |
| gene:Sme2.5_00225.1_g00028.1 | 110.12   | 110.84   | 116.26   | 36.84   | 88.75    | 40.31   | 1.0246 | 0.00205961 |
| novel.1216                   | 66.44    | 66.69    | 82.23    | 41.17   | 38.96    | 25.84   | 1.0251 | 0.00062029 |
| gene:Sme2.5_08745.1_g00002.1 | 46.41    | 66.69    | 47.26    | 18.42   | 29.22    | 31.01   | 1.0258 | 0.00364991 |
| gene:Sme2.5_01200.1_g00009.1 | 73.72    | 76.09    | 100.19   | 47.67   | 37.88    | 37.21   | 1.0263 | 0.00022921 |
| gene:Sme2.5_00043.1_g00009.1 | 227.52   | 175.65   | 209.83   | 62.84   | 146.12   | 92.00   | 1.0268 | 0.00031217 |
| gene:Sme2.5_03328.1_g00004.1 | 50.05    | 57.30    | 79.40    | 15.17   | 44.38    | 32.04   | 1.0269 | 0.01023192 |
| gene:Sme2.5_00017.1_g00049.1 | 273.94   | 86.42    | 187.15   | 95.34   | 86.59    | 86.83   | 1.0271 | 0.00367539 |
| gene:Sme2.5_10454.1_g00003.1 | 305.79   | 247.98   | 288.28   | 126.76  | 164.52   | 121.98  | 1.0278 | 2.92E-08   |
| gene:Sme2.5_04681.1_g00001.1 | 90.10    | 88.30    | 82.23    | 19.50   | 63.86    | 44.45   | 1.0278 | 0.00522086 |

|                              |          |          |          |          |          |          |        |            |
|------------------------------|----------|----------|----------|----------|----------|----------|--------|------------|
| gene:Sme2.5_14547.1_g00002.1 | 1232.26  | 1104.65  | 1206.99  | 500.55   | 665.64   | 571.63   | 1.0281 | 2.93E-14   |
| gene:Sme2.5_05172.1_g00006.1 | 64.62    | 58.24    | 55.77    | 32.50    | 33.55    | 21.71    | 1.0282 | 0.0010616  |
| gene:Sme2.5_13802.1_g00002.1 | 347.65   | 375.73   | 374.29   | 188.52   | 189.41   | 160.22   | 1.0290 | 3.21E-12   |
| gene:Sme2.5_03645.1_g00006.1 | 54.61    | 60.12    | 48.20    | 28.17    | 20.56    | 31.01    | 1.0292 | 0.00160193 |
| gene:Sme2.5_03296.1_g00008.1 | 55.52    | 56.36    | 49.15    | 31.42    | 21.65    | 25.84    | 1.0295 | 0.00137608 |
| gene:Sme2.5_00275.1_g00006.1 | 408.63   | 331.58   | 321.36   | 135.43   | 229.46   | 155.05   | 1.0304 | 2.27E-06   |
| gene:Sme2.5_01677.1_g00003.1 | 91.01    | 94.87    | 86.96    | 30.34    | 68.19    | 35.15    | 1.0307 | 0.00148503 |
| gene:Sme2.5_00284.1_g00001.1 | 2080.47  | 1854.24  | 1985.82  | 813.66   | 1132.13  | 952.03   | 1.0308 | 1.82E-13   |
| gene:Sme2.5_01031.1_g00012.1 | 329.45   | 269.59   | 313.80   | 123.51   | 176.42   | 146.78   | 1.0312 | 2.23E-08   |
| gene:Sme2.5_07751.1_g00001.1 | 32745.03 | 29917.69 | 32214.57 | 13363.16 | 17619.52 | 15434.10 | 1.0314 | 3.11E-17   |
| gene:Sme2.5_14820.1_g00003.1 | 59.16    | 88.30    | 70.89    | 48.75    | 27.06    | 31.01    | 1.0319 | 0.0015997  |
| gene:Sme2.5_04684.1_g00002.1 | 1789.24  | 2348.33  | 2117.20  | 605.64   | 1467.66  | 985.11   | 1.0322 | 6.82E-05   |
| gene:Sme2.5_21622.1_g00001.1 | 99.20    | 72.33    | 82.23    | 57.42    | 38.96    | 27.91    | 1.0325 | 0.00110616 |
| novel.1280                   | 2112.32  | 2814.24  | 2413.04  | 1124.61  | 1256.60  | 1206.32  | 1.0326 | 5.51E-15   |
| gene:Sme2.5_10648.1_g00001.1 | 145.61   | 135.26   | 196.60   | 59.59    | 89.83    | 83.73    | 1.0333 | 2.89E-05   |
| gene:Sme2.5_12280.1_g00002.1 | 102.84   | 95.81    | 85.07    | 43.34    | 51.95    | 43.42    | 1.0334 | 3.38E-05   |
| gene:Sme2.5_00013.1_g00023.1 | 2801.26  | 3047.19  | 2861.06  | 1214.54  | 1652.74  | 1386.18  | 1.0340 | 5.12E-15   |
| gene:Sme2.5_07343.1_g00004.1 | 619.77   | 653.77   | 623.82   | 281.69   | 355.01   | 289.43   | 1.0350 | 3.40E-14   |
| gene:Sme2.5_05304.1_g00001.1 | 50.97    | 31.94    | 63.33    | 19.50    | 25.98    | 25.84    | 1.0350 | 0.00691653 |
| gene:Sme2.5_00011.1_g00028.1 | 184.75   | 166.26   | 155.95   | 65.01    | 103.91   | 78.56    | 1.0352 | 3.81E-06   |
| gene:Sme2.5_04436.1_g00004.1 | 204.77   | 144.66   | 195.65   | 104.01   | 81.18    | 80.63    | 1.0369 | 3.32E-06   |
| gene:Sme2.5_03104.1_g00005.1 | 173.83   | 181.29   | 161.63   | 80.17    | 94.16    | 77.53    | 1.0376 | 7.98E-08   |
| gene:Sme2.5_03271.1_g00006.1 | 2855.86  | 2702.45  | 2763.71  | 1092.11  | 1663.57  | 1298.32  | 1.0376 | 2.46E-11   |
| novel.2752                   | 1795.61  | 2757.88  | 2310.97  | 884.09   | 1360.51  | 1098.82  | 1.0378 | 1.16E-07   |
| gene:Sme2.5_00588.1_g00008.1 | 135.60   | 176.59   | 151.23   | 62.84    | 75.76    | 86.83    | 1.0380 | 2.91E-06   |
| gene:Sme2.5_01485.1_g00013.1 | 1013.84  | 1179.80  | 1095.46  | 495.13   | 568.23   | 537.52   | 1.0387 | 2.07E-18   |
| gene:Sme2.5_02071.1_g00002.1 | 46.41    | 51.66    | 44.42    | 22.75    | 25.98    | 20.67    | 1.0390 | 0.0019024  |
| gene:Sme2.5_02331.1_g00003.1 | 182.93   | 211.35   | 203.21   | 69.34    | 142.87   | 78.56    | 1.0397 | 0.00012132 |
| gene:Sme2.5_00064.1_g00015.1 | 41.86    | 47.91    | 59.55    | 29.25    | 22.73    | 20.67    | 1.0399 | 0.00264967 |
| gene:Sme2.5_03330.1_g00005.1 | 317.62   | 233.89   | 285.44   | 185.27   | 76.85    | 144.72   | 1.0407 | 0.000241   |

|                              |          |          |          |          |          |          |        |            |
|------------------------------|----------|----------|----------|----------|----------|----------|--------|------------|
| gene:Sme2.5_14820.1_g00002.1 | 54.61    | 78.90    | 64.27    | 37.92    | 31.39    | 26.88    | 1.0410 | 0.00080556 |
| gene:Sme2.5_07849.1_g00001.1 | 364.95   | 408.61   | 372.40   | 145.18   | 235.95   | 175.73   | 1.0413 | 6.20E-08   |
| gene:Sme2.5_00820.1_g00008.1 | 526.94   | 341.92   | 454.63   | 229.69   | 176.42   | 236.72   | 1.0417 | 2.48E-07   |
| gene:Sme2.5_03796.1_g00003.1 | 206.59   | 183.17   | 216.45   | 47.67    | 152.61   | 94.07    | 1.0424 | 0.00187189 |
| gene:Sme2.5_02233.1_g00009.1 | 388.61   | 341.92   | 359.17   | 187.44   | 175.34   | 166.42   | 1.0427 | 1.16E-12   |
| gene:Sme2.5_05516.1_g00004.1 | 2572.82  | 1685.16  | 2189.04  | 1510.32  | 607.20   | 1011.99  | 1.0427 | 0.0001495  |
| gene:Sme2.5_04220.1_g00002.1 | 427.74   | 457.45   | 445.18   | 135.43   | 284.66   | 225.35   | 1.0433 | 9.26E-06   |
| gene:Sme2.5_00099.1_g00002.1 | 1022.03  | 818.16   | 920.61   | 386.79   | 515.20   | 437.25   | 1.0438 | 4.86E-12   |
| gene:Sme2.5_11468.1_g00007.1 | 88811.12 | 92851.92 | 92513.27 | 45953.06 | 42858.77 | 44085.02 | 1.0448 | 2.50E-42   |
| gene:Sme2.5_13615.1_g00001.1 | 48.23    | 46.97    | 50.09    | 18.42    | 28.14    | 23.77    | 1.0464 | 0.00192162 |
| gene:Sme2.5_00041.1_g00009.1 | 1159.45  | 1154.44  | 1150.28  | 498.38   | 628.84   | 549.93   | 1.0466 | 4.09E-18   |
| gene:Sme2.5_00538.1_g00012.1 | 253.00   | 230.14   | 306.24   | 87.76    | 146.12   | 147.82   | 1.0474 | 5.65E-06   |
| gene:Sme2.5_04963.1_g00002.1 | 359.49   | 332.52   | 368.62   | 205.85   | 146.12   | 161.26   | 1.0476 | 8.57E-10   |
| gene:Sme2.5_30277.1_g00001.1 | 49.14    | 39.45    | 50.09    | 19.50    | 20.56    | 26.88    | 1.0489 | 0.00265878 |
| gene:Sme2.5_00396.1_g00023.1 | 244.81   | 248.92   | 278.83   | 89.93    | 155.86   | 127.14   | 1.0505 | 9.16E-07   |
| gene:Sme2.5_00899.1_g00009.1 | 240.26   | 139.02   | 198.49   | 80.17    | 92.00    | 106.47   | 1.0517 | 2.25E-05   |
| gene:Sme2.5_05974.1_g00004.1 | 78.27    | 80.78    | 72.78    | 34.67    | 33.55    | 43.42    | 1.0526 | 0.00010331 |
| gene:Sme2.5_05215.1_g00002.1 | 8551.20  | 8893.58  | 8560.50  | 3768.21  | 4669.24  | 4097.57  | 1.0528 | 9.37E-23   |
| gene:Sme2.5_03583.1_g00010.1 | 1733.72  | 1427.78  | 1602.08  | 660.90   | 846.40   | 787.68   | 1.0536 | 8.58E-15   |
| novel.2778                   | 64.62    | 50.72    | 70.89    | 34.67    | 31.39    | 23.77    | 1.0538 | 0.00089195 |
| gene:Sme2.5_08853.1_g00003.1 | 205.68   | 207.59   | 196.60   | 62.84    | 121.22   | 109.57   | 1.0538 | 1.29E-05   |
| gene:Sme2.5_08297.1_g00002.1 | 1138.52  | 1121.56  | 1087.90  | 444.21   | 628.84   | 539.59   | 1.0539 | 2.13E-13   |
| gene:Sme2.5_01369.1_g00005.1 | 28267.39 | 24201.86 | 26331.77 | 14660.04 | 10654.62 | 12610.04 | 1.0551 | 9.56E-15   |
| novel.324                    | 269.39   | 180.35   | 219.28   | 79.09    | 136.38   | 106.47   | 1.0556 | 1.72E-05   |
| gene:Sme2.5_02138.1_g00004.1 | 130.14   | 92.05    | 135.16   | 80.17    | 42.21    | 49.62    | 1.0559 | 0.00038663 |
| gene:Sme2.5_16000.1_g00002.1 | 1053.88  | 634.05   | 895.09   | 433.38   | 406.96   | 402.11   | 1.0561 | 1.73E-08   |
| gene:Sme2.5_04755.1_g00003.1 | 399.53   | 405.79   | 459.36   | 221.02   | 200.23   | 187.10   | 1.0562 | 5.57E-13   |
| gene:Sme2.5_00091.1_g00022.1 | 984.72   | 876.40   | 935.73   | 320.70   | 619.10   | 405.21   | 1.0563 | 9.99E-07   |
| gene:Sme2.5_00204.1_g00006.1 | 138.33   | 118.36   | 154.06   | 79.09    | 58.45    | 59.95    | 1.0572 | 5.19E-06   |
| gene:Sme2.5_05092.1_g00008.1 | 192.03   | 242.35   | 216.45   | 75.84    | 136.38   | 100.27   | 1.0584 | 6.24E-06   |

|                              |          |          |          |         |         |         |        |            |
|------------------------------|----------|----------|----------|---------|---------|---------|--------|------------|
| gene:Sme2.5_01707.1_g00009.1 | 110.12   | 76.09    | 85.07    | 35.75   | 57.36   | 37.21   | 1.0593 | 0.00035632 |
| gene:Sme2.5_04259.1_g00008.1 | 202.95   | 190.68   | 161.63   | 92.09   | 81.18   | 93.03   | 1.0601 | 5.95E-08   |
| gene:Sme2.5_02618.1_g00007.1 | 1192.22  | 1074.59  | 1150.28  | 555.81  | 568.23  | 514.78  | 1.0605 | 1.78E-22   |
| gene:Sme2.5_02571.1_g00015.1 | 141.97   | 165.32   | 148.39   | 57.42   | 84.42   | 76.49   | 1.0608 | 1.38E-06   |
| gene:Sme2.5_04152.1_g00001.1 | 91.92    | 112.72   | 104.91   | 54.17   | 50.87   | 43.42   | 1.0609 | 1.30E-05   |
| gene:Sme2.5_13254.1_g00001.1 | 62.80    | 38.51    | 45.37    | 24.92   | 21.65   | 23.77   | 1.0612 | 0.00294865 |
| gene:Sme2.5_06569.1_g00007.1 | 2870.42  | 3332.75  | 3067.11  | 1163.62 | 1873.54 | 1404.79 | 1.0614 | 6.72E-10   |
| novel.2355                   | 122.86   | 137.14   | 143.67   | 58.51   | 79.01   | 55.82   | 1.0629 | 3.30E-06   |
| gene:Sme2.5_00029.1_g00014.1 | 1313.26  | 914.91   | 1120.04  | 492.97  | 586.63  | 523.05  | 1.0631 | 2.32E-11   |
| gene:Sme2.5_01011.1_g00007.1 | 3059.72  | 2262.85  | 2668.24  | 1244.87 | 1360.51 | 1218.73 | 1.0633 | 3.19E-15   |
| gene:Sme2.5_01610.1_g00010.1 | 595.20   | 488.45   | 507.56   | 223.19  | 295.48  | 242.92  | 1.0634 | 3.02E-11   |
| gene:Sme2.5_00371.1_g00011.1 | 1082.10  | 1177.92  | 1131.38  | 497.30  | 607.20  | 515.81  | 1.0657 | 1.36E-18   |
| gene:Sme2.5_02386.1_g00008.1 | 186.57   | 201.96   | 169.19   | 79.09   | 96.33   | 90.97   | 1.0658 | 3.04E-08   |
| gene:Sme2.5_02401.1_g00003.1 | 247.54   | 256.44   | 280.72   | 99.68   | 168.85  | 106.47  | 1.0659 | 1.52E-06   |
| gene:Sme2.5_00100.1_g00022.1 | 5561.56  | 3848.44  | 4844.99  | 2118.13 | 2429.87 | 2260.69 | 1.0661 | 5.40E-13   |
| gene:Sme2.5_02531.1_g00005.1 | 1634.52  | 1733.07  | 1743.86  | 658.73  | 1018.49 | 763.90  | 1.0663 | 5.66E-11   |
| gene:Sme2.5_00158.1_g00017.1 | 3283.60  | 2538.07  | 3141.78  | 1527.65 | 1344.27 | 1407.89 | 1.0666 | 1.62E-16   |
| gene:Sme2.5_02557.1_g00014.1 | 122.86   | 115.54   | 120.98   | 43.34   | 66.02   | 62.02   | 1.0676 | 7.22E-06   |
| gene:Sme2.5_02238.1_g00004.1 | 341.28   | 274.28   | 367.68   | 164.68  | 150.45  | 154.02  | 1.0676 | 6.07E-10   |
| gene:Sme2.5_29773.1_g00001.1 | 17048.71 | 16603.61 | 16790.18 | 7233.05 | 8683.67 | 8126.91 | 1.0690 | 2.16E-27   |
| gene:Sme2.5_06427.1_g00002.1 | 75.54    | 114.60   | 91.68    | 43.34   | 44.38   | 46.52   | 1.0691 | 7.71E-05   |
| gene:Sme2.5_00549.1_g00015.1 | 285.77   | 208.53   | 230.62   | 120.26  | 113.65  | 111.64  | 1.0696 | 1.87E-08   |
| novel.965                    | 1214.06  | 935.57   | 1098.30  | 430.13  | 594.21  | 523.05  | 1.0697 | 2.27E-11   |
| gene:Sme2.5_07452.1_g00005.1 | 60.98    | 64.81    | 57.66    | 42.25   | 15.15   | 29.98   | 1.0698 | 0.00380152 |
| gene:Sme2.5_01689.1_g00009.1 | 2591.94  | 2365.24  | 2455.58  | 1611.08 | 757.64  | 1157.74 | 1.0718 | 1.85E-06   |
| gene:Sme2.5_05172.1_g00005.1 | 381.33   | 284.62   | 324.20   | 151.68  | 153.69  | 165.39  | 1.0726 | 3.94E-10   |
| gene:Sme2.5_03296.1_g00001.1 | 104.66   | 66.69    | 84.12    | 40.09   | 40.05   | 41.35   | 1.0730 | 0.00015594 |
| gene:Sme2.5_11042.1_g00001.1 | 758.10   | 585.20   | 694.71   | 322.87  | 343.10  | 302.87  | 1.0733 | 1.31E-13   |
| gene:Sme2.5_01699.1_g00004.1 | 30.03    | 30.06    | 38.75    | 14.08   | 19.48   | 13.44   | 1.0733 | 0.0089912  |
| gene:Sme2.5_00015.1_g00031.1 | 295.78   | 204.77   | 260.87   | 139.76  | 101.74  | 119.91  | 1.0754 | 2.79E-07   |

|                              |          |          |          |          |          |          |        |            |
|------------------------------|----------|----------|----------|----------|----------|----------|--------|------------|
| gene:Sme2.5_02268.1_g00008.1 | 76.45    | 85.48    | 100.19   | 39.00    | 63.86    | 21.71    | 1.0756 | 0.0030567  |
| gene:Sme2.5_00121.1_g00015.1 | 2314.36  | 2229.03  | 2255.20  | 814.75   | 1359.43  | 1051.27  | 1.0758 | 6.48E-10   |
| novel.1236                   | 225.70   | 246.10   | 257.09   | 85.59    | 152.61   | 107.50   | 1.0763 | 1.43E-06   |
| gene:Sme2.5_05729.1_g00001.1 | 150.16   | 89.24    | 148.39   | 88.84    | 46.54    | 48.58    | 1.0771 | 0.00085924 |
| gene:Sme2.5_22920.1_g00001.1 | 191.12   | 174.72   | 206.99   | 70.42    | 129.88   | 71.32    | 1.0775 | 3.29E-05   |
| gene:Sme2.5_08745.1_g00001.1 | 101.93   | 102.39   | 108.70   | 37.92    | 63.86    | 46.52    | 1.0781 | 3.36E-05   |
| gene:Sme2.5_00690.1_g00012.1 | 1125.78  | 1005.08  | 993.38   | 384.62   | 598.54   | 495.14   | 1.0796 | 1.35E-10   |
| gene:Sme2.5_01056.1_g00005.1 | 619.77   | 590.84   | 647.45   | 240.52   | 332.28   | 305.97   | 1.0800 | 8.06E-13   |
| gene:Sme2.5_11202.1_g00001.1 | 464.15   | 411.43   | 453.69   | 140.85   | 272.75   | 215.01   | 1.0803 | 9.91E-07   |
| gene:Sme2.5_13446.1_g00001.1 | 235.71   | 257.38   | 278.83   | 92.09    | 146.12   | 126.11   | 1.0828 | 8.71E-08   |
| gene:Sme2.5_00468.1_g00006.1 | 427.74   | 427.40   | 431.00   | 159.27   | 264.09   | 184.00   | 1.0828 | 2.22E-08   |
| gene:Sme2.5_00058.1_g00011.1 | 38.22    | 33.82    | 38.75    | 16.25    | 21.65    | 14.47    | 1.0830 | 0.00488014 |
| gene:Sme2.5_04131.1_g00002.1 | 67.35    | 63.87    | 63.33    | 20.59    | 45.46    | 25.84    | 1.0835 | 0.00158149 |
| gene:Sme2.5_03678.1_g00009.1 | 852.75   | 957.18   | 990.55   | 356.45   | 530.35   | 434.15   | 1.0840 | 2.27E-11   |
| novel.2011                   | 303.06   | 282.74   | 309.07   | 164.68   | 135.29   | 121.98   | 1.0856 | 1.77E-10   |
| gene:Sme2.5_00499.1_g00004.1 | 22222.57 | 20982.77 | 21712.67 | 10307.86 | 10250.91 | 10013.40 | 1.0864 | 3.74E-48   |
| novel.250                    | 72.81    | 79.84    | 107.75   | 40.09    | 38.96    | 43.42    | 1.0871 | 0.0001     |
| novel.694                    | 78.27    | 50.72    | 77.50    | 46.59    | 24.89    | 25.84    | 1.0871 | 0.00209261 |
| gene:Sme2.5_03979.1_g00002.1 | 1672.75  | 1495.41  | 1453.69  | 733.49   | 675.38   | 765.97   | 1.0875 | 4.61E-22   |
| gene:Sme2.5_20421.1_g00001.1 | 228.43   | 187.87   | 208.88   | 89.93    | 102.82   | 101.30   | 1.0882 | 3.72E-09   |
| novel.2437                   | 117.40   | 131.51   | 112.48   | 54.17    | 74.68    | 41.35    | 1.0883 | 3.16E-05   |
| gene:Sme2.5_03011.1_g00005.1 | 74.63    | 110.84   | 89.79    | 37.92    | 61.69    | 29.98    | 1.0884 | 0.00075493 |
| novel.861                    | 568.81   | 369.16   | 469.75   | 274.11   | 163.43   | 224.31   | 1.0889 | 1.37E-06   |
| gene:Sme2.5_01417.1_g00006.1 | 3527.51  | 2887.50  | 3304.35  | 1360.80  | 1660.32  | 1546.41  | 1.0895 | 2.49E-18   |
| gene:Sme2.5_00721.1_g00002.1 | 1829.28  | 1672.01  | 1792.06  | 641.40   | 1026.06  | 816.62   | 1.0915 | 7.80E-11   |
| novel.3146                   | 52.79    | 54.48    | 58.60    | 17.34    | 34.64    | 25.84    | 1.0917 | 0.00141491 |
| gene:Sme2.5_00427.1_g00010.1 | 2309.81  | 2375.57  | 2468.81  | 1040.10  | 1214.39  | 1101.92  | 1.0919 | 1.12E-26   |
| gene:Sme2.5_08011.1_g00002.1 | 17602.96 | 12443.32 | 14629.50 | 5728.15  | 8228.00  | 7001.21  | 1.0920 | 1.05E-10   |
| gene:Sme2.5_03930.1_g00002.1 | 297.60   | 215.11   | 261.81   | 92.09    | 147.20   | 124.04   | 1.0921 | 6.87E-07   |
| gene:Sme2.5_00022.1_g00007.1 | 247.54   | 242.35   | 272.21   | 110.51   | 135.29   | 111.64   | 1.0927 | 2.27E-10   |

|                              |          |         |         |         |         |         |        |            |
|------------------------------|----------|---------|---------|---------|---------|---------|--------|------------|
| gene:Sme2.5_11747.1_g00001.1 | 297.60   | 299.65  | 273.16  | 147.35  | 117.98  | 142.65  | 1.0929 | 2.85E-11   |
| gene:Sme2.5_01314.1_g00006.1 | 10092.90 | 9215.78 | 9602.08 | 3692.37 | 5442.04 | 4416.98 | 1.0932 | 9.46E-14   |
| gene:Sme2.5_11120.1_g00001.1 | 64.62    | 66.69   | 69.94   | 21.67   | 56.28   | 16.54   | 1.0932 | 0.01024774 |
| gene:Sme2.5_05825.1_g00008.1 | 123.77   | 67.63   | 116.26  | 31.42   | 73.60   | 39.28   | 1.0934 | 0.00291829 |
| gene:Sme2.5_05361.1_g00002.1 | 882.79   | 752.40  | 790.17  | 329.37  | 437.27  | 370.06  | 1.0935 | 5.58E-14   |
| gene:Sme2.5_03391.1_g00010.1 | 336.73   | 263.01  | 368.62  | 165.77  | 124.47  | 163.32  | 1.0939 | 2.54E-08   |
| gene:Sme2.5_16651.1_g00002.1 | 109.21   | 58.24   | 81.29   | 66.09   | 20.56   | 29.98   | 1.0942 | 0.01023997 |
| gene:Sme2.5_08000.1_g00005.1 | 4365.70  | 3139.24 | 3879.96 | 2158.21 | 1441.69 | 1730.41 | 1.0949 | 4.77E-10   |
| gene:Sme2.5_00026.1_g00008.1 | 4274.69  | 3285.78 | 3856.33 | 1525.48 | 1955.80 | 1861.68 | 1.0954 | 1.67E-14   |
| gene:Sme2.5_05106.1_g00008.1 | 85.55    | 52.60   | 69.00   | 18.42   | 45.46   | 33.08   | 1.0956 | 0.00314671 |
| gene:Sme2.5_05086.1_g00002.1 | 130.14   | 85.48   | 103.97  | 54.17   | 57.36   | 38.25   | 1.0958 | 8.03E-05   |
| gene:Sme2.5_03478.1_g00005.1 | 169.28   | 176.59  | 167.30  | 102.93  | 63.86   | 73.39   | 1.0960 | 7.78E-07   |
| gene:Sme2.5_01194.1_g00001.1 | 4785.25  | 3428.56 | 4075.62 | 2047.70 | 1743.66 | 1955.75 | 1.0965 | 1.95E-14   |
| gene:Sme2.5_02641.1_g00005.1 | 56.43    | 35.69   | 58.60   | 24.92   | 27.06   | 18.61   | 1.0967 | 0.00273897 |
| gene:Sme2.5_00147.1_g00014.1 | 137.42   | 115.54  | 148.39  | 55.26   | 71.43   | 60.99   | 1.0968 | 1.47E-06   |
| gene:Sme2.5_00236.1_g00024.1 | 911.91   | 860.43  | 782.61  | 439.88  | 342.02  | 411.41  | 1.0983 | 2.67E-15   |
| novel.1538                   | 172.92   | 196.32  | 174.86  | 89.93   | 93.08   | 71.32   | 1.0984 | 2.90E-08   |
| gene:Sme2.5_12477.1_g00001.1 | 1769.21  | 1664.49 | 1848.77 | 647.90  | 1005.50 | 812.48  | 1.0991 | 1.18E-11   |
| novel.2981                   | 39.13    | 37.57   | 39.70   | 16.25   | 17.32   | 20.67   | 1.1000 | 0.00287361 |
| gene:Sme2.5_09472.1_g00001.1 | 111.03   | 94.87   | 107.75  | 36.84   | 70.35   | 39.28   | 1.1000 | 0.00017522 |
| gene:Sme2.5_01363.1_g00006.1 | 1701.87  | 1465.36 | 1636.11 | 551.47  | 956.79  | 731.86  | 1.1005 | 5.02E-09   |
| gene:Sme2.5_06514.1_g00005.1 | 958.32   | 716.71  | 882.80  | 448.54  | 314.96  | 427.95  | 1.1021 | 3.68E-10   |
| gene:Sme2.5_00039.1_g00025.1 | 2426.30  | 1746.22 | 2053.88 | 902.51  | 1103.99 | 893.11  | 1.1027 | 8.79E-13   |
| gene:Sme2.5_00161.1_g00014.1 | 87.37    | 44.15   | 63.33   | 32.50   | 33.55   | 24.81   | 1.1029 | 0.00182837 |
| gene:Sme2.5_03467.1_g00007.1 | 92.83    | 62.00   | 81.29   | 33.59   | 44.38   | 32.04   | 1.1035 | 0.00021687 |
| gene:Sme2.5_30648.1_g00001.1 | 93.74    | 77.96   | 77.50   | 31.42   | 34.64   | 49.62   | 1.1051 | 0.00011044 |
| gene:Sme2.5_04102.1_g00009.1 | 117.40   | 74.21   | 74.67   | 29.25   | 56.28   | 38.25   | 1.1064 | 0.00086902 |
| gene:Sme2.5_00749.1_g00002.1 | 63.71    | 47.91   | 42.53   | 33.59   | 19.48   | 18.61   | 1.1076 | 0.00305582 |
| gene:Sme2.5_05247.1_g00007.1 | 481.44   | 486.57  | 453.69  | 190.69  | 246.78  | 222.24  | 1.1077 | 2.85E-14   |
| gene:Sme2.5_00803.1_g00008.1 | 50.97    | 49.78   | 25.52   | 15.17   | 21.65   | 21.71   | 1.1093 | 0.00803985 |

|                              |          |          |          |          |         |         |        |            |
|------------------------------|----------|----------|----------|----------|---------|---------|--------|------------|
| gene:Sme2.5_00100.1_g00004.1 | 2092.30  | 2449.77  | 2367.68  | 899.26   | 1192.75 | 1110.19 | 1.1095 | 3.65E-16   |
| novel.1677                   | 137.42   | 203.83   | 164.46   | 65.01    | 84.42   | 84.76   | 1.1096 | 1.90E-06   |
| gene:Sme2.5_03303.1_g00002.1 | 232.98   | 131.51   | 206.05   | 91.01    | 85.51   | 87.86   | 1.1101 | 7.34E-06   |
| gene:Sme2.5_01762.1_g00003.1 | 2145.99  | 1701.13  | 1936.67  | 877.59   | 873.45  | 925.16  | 1.1118 | 2.22E-20   |
| gene:Sme2.5_00474.1_g00017.1 | 78.27    | 220.74   | 125.71   | 48.75    | 62.78   | 84.76   | 1.1120 | 0.0029532  |
| gene:Sme2.5_01489.1_g00006.1 | 34.58    | 27.24    | 30.25    | 9.75     | 17.32   | 15.51   | 1.1122 | 0.00983089 |
| novel.1441                   | 76.45    | 57.30    | 80.34    | 26.00    | 34.64   | 38.25   | 1.1130 | 0.00026968 |
| gene:Sme2.5_00234.1_g00013.1 | 22423.70 | 18564.94 | 20970.71 | 12163.79 | 6828.53 | 9651.61 | 1.1131 | 5.58E-09   |
| gene:Sme2.5_00942.1_g00012.1 | 637.06   | 671.62   | 712.67   | 251.36   | 356.09  | 325.61  | 1.1150 | 6.95E-13   |
| gene:Sme2.5_13607.1_g00002.1 | 83.73    | 96.75    | 75.61    | 27.09    | 46.54   | 44.45   | 1.1158 | 0.00013347 |
| novel.1230                   | 40.04    | 28.18    | 31.19    | 14.08    | 18.40   | 13.44   | 1.1164 | 0.00704979 |
| gene:Sme2.5_01032.1_g00003.1 | 36.40    | 44.15    | 49.15    | 14.08    | 29.22   | 16.54   | 1.1167 | 0.00492302 |
| gene:Sme2.5_03829.1_g00011.1 | 53.70    | 34.76    | 54.82    | 18.42    | 24.89   | 22.74   | 1.1170 | 0.00229209 |
| gene:Sme2.5_01898.1_g00008.1 | 442.30   | 400.15   | 460.30   | 196.10   | 209.98  | 194.33  | 1.1178 | 1.40E-15   |
| gene:Sme2.5_01445.1_g00002.1 | 119.22   | 153.11   | 138.00   | 59.59    | 62.78   | 66.16   | 1.1211 | 3.47E-07   |
| gene:Sme2.5_00622.1_g00005.1 | 384.97   | 214.17   | 358.22   | 105.09   | 181.83  | 152.99  | 1.1218 | 2.87E-05   |
| gene:Sme2.5_00070.1_g00011.1 | 138.33   | 60.12    | 99.24    | 46.59    | 45.46   | 44.45   | 1.1259 | 0.00071638 |
| gene:Sme2.5_00161.1_g00022.1 | 955.59   | 1035.14  | 966.92   | 356.45   | 547.67  | 450.69  | 1.1263 | 4.70E-12   |
| gene:Sme2.5_00037.1_g00026.1 | 1218.61  | 1455.96  | 1371.46  | 419.29   | 843.15  | 590.24  | 1.1269 | 3.29E-07   |
| gene:Sme2.5_01077.1_g00004.1 | 47.32    | 34.76    | 35.92    | 10.83    | 14.07   | 28.94   | 1.1273 | 0.0111105  |
| gene:Sme2.5_01233.1_g00013.1 | 1938.49  | 1956.63  | 1934.78  | 731.32   | 1045.55 | 891.04  | 1.1277 | 1.29E-15   |
| gene:Sme2.5_05777.1_g00001.1 | 49.14    | 62.94    | 71.83    | 14.08    | 38.96   | 31.01   | 1.1281 | 0.00347442 |
| gene:Sme2.5_02790.1_g00004.1 | 121.04   | 92.99    | 137.05   | 52.01    | 42.21   | 66.16   | 1.1286 | 2.85E-05   |
| gene:Sme2.5_05066.1_g00002.1 | 78.27    | 56.36    | 63.33    | 31.42    | 27.06   | 32.04   | 1.1289 | 0.00020786 |
| gene:Sme2.5_05242.1_g00002.1 | 243.90   | 179.41   | 237.24   | 69.34    | 138.54  | 94.07   | 1.1298 | 1.65E-05   |
| gene:Sme2.5_00595.1_g00006.1 | 1842.02  | 794.67   | 1482.04  | 756.24   | 537.93  | 586.10  | 1.1314 | 1.82E-05   |
| gene:Sme2.5_06530.1_g00007.1 | 1638.16  | 1774.40  | 1699.43  | 608.89   | 987.10  | 734.96  | 1.1330 | 4.59E-11   |
| gene:Sme2.5_05428.1_g00008.1 | 67.35    | 63.87    | 69.94    | 21.67    | 41.13   | 28.94   | 1.1332 | 0.00034724 |
| gene:Sme2.5_00803.1_g00012.1 | 342.19   | 295.89   | 320.42   | 124.60   | 165.60  | 146.78  | 1.1333 | 1.78E-11   |
| gene:Sme2.5_21041.1_g00001.1 | 55.52    | 69.51    | 61.44    | 26.00    | 19.48   | 39.28   | 1.1336 | 0.00083869 |



|                              |         |         |         |         |         |         |        |            |
|------------------------------|---------|---------|---------|---------|---------|---------|--------|------------|
| gene:Sme2.5_21731.1_g00002.1 | 49.14   | 49.78   | 41.59   | 21.67   | 24.89   | 17.57   | 1.1338 | 0.00111312 |
| gene:Sme2.5_06456.1_g00004.1 | 151.99  | 150.29  | 122.87  | 59.59   | 59.53   | 74.43   | 1.1342 | 3.58E-07   |
| gene:Sme2.5_01565.1_g00004.1 | 1761.02 | 1574.32 | 1605.86 | 739.99  | 690.54  | 818.69  | 1.1352 | 1.71E-23   |
| gene:Sme2.5_00095.1_g00016.1 | 733.53  | 502.54  | 666.35  | 345.62  | 263.01  | 256.36  | 1.1376 | 1.85E-09   |
| novel.2553                   | 41.86   | 54.48   | 34.97   | 14.08   | 23.81   | 21.71   | 1.1386 | 0.00323939 |
| novel.1157                   | 224.79  | 100.51  | 155.95  | 72.59   | 76.85   | 69.26   | 1.1387 | 0.0001359  |
| gene:Sme2.5_00966.1_g00004.1 | 439.57  | 276.16  | 360.11  | 120.26  | 201.32  | 166.42  | 1.1406 | 1.39E-06   |
| gene:Sme2.5_01636.1_g00002.1 | 245.72  | 223.56  | 277.88  | 98.59   | 148.28  | 92.00   | 1.1416 | 2.03E-07   |
| gene:Sme2.5_01417.1_g00002.1 | 2871.33 | 2153.89 | 2553.88 | 1069.36 | 1279.33 | 1084.35 | 1.1427 | 5.06E-16   |
| gene:Sme2.5_01146.1_g00010.1 | 98.29   | 126.81  | 106.81  | 44.42   | 53.03   | 52.72   | 1.1432 | 2.60E-06   |
| gene:Sme2.5_00745.1_g00012.1 | 1329.64 | 1055.81 | 1292.06 | 447.46  | 603.95  | 612.98  | 1.1435 | 1.23E-12   |
| gene:Sme2.5_00743.1_g00005.1 | 51.88   | 28.18   | 23.63   | 18.42   | 14.07   | 14.47   | 1.1451 | 0.0133001  |
| gene:Sme2.5_03678.1_g00011.1 | 242.99  | 242.35  | 232.51  | 92.09   | 104.99  | 127.14  | 1.1453 | 3.08E-10   |
| gene:Sme2.5_29799.1_g00001.1 | 52.79   | 64.81   | 59.55   | 22.75   | 33.55   | 23.77   | 1.1461 | 0.00035439 |
| gene:Sme2.5_07791.1_g00001.1 | 1500.74 | 1477.57 | 1489.60 | 442.04  | 904.84  | 671.90  | 1.1461 | 1.39E-07   |
| gene:Sme2.5_14095.1_g00002.1 | 66.44   | 47.91   | 52.93   | 32.50   | 15.15   | 27.91   | 1.1461 | 0.00164897 |
| gene:Sme2.5_00317.1_g00002.1 | 2237.91 | 1824.18 | 2128.55 | 1021.68 | 834.49  | 939.63  | 1.1469 | 6.62E-19   |
| gene:Sme2.5_06035.1_g00001.1 | 393.16  | 327.83  | 398.87  | 133.26  | 206.73  | 165.39  | 1.1480 | 2.08E-09   |
| gene:Sme2.5_04113.1_g00006.1 | 82.82   | 80.78   | 94.52   | 43.34   | 44.38   | 28.94   | 1.1480 | 3.45E-05   |
| gene:Sme2.5_03055.1_g00003.1 | 55.52   | 34.76   | 33.08   | 21.67   | 23.81   | 10.34   | 1.1488 | 0.00858239 |
| gene:Sme2.5_31184.1_g00001.1 | 70.99   | 35.69   | 61.44   | 22.75   | 33.55   | 19.64   | 1.1488 | 0.00315348 |
| gene:Sme2.5_03959.1_g00004.1 | 1129.42 | 858.55  | 1013.23 | 371.62  | 537.93  | 443.46  | 1.1495 | 1.47E-11   |
| gene:Sme2.5_04242.1_g00007.1 | 2996.93 | 3114.82 | 3037.81 | 1445.31 | 1260.93 | 1415.13 | 1.1505 | 9.91E-33   |
| gene:Sme2.5_00569.1_g00014.1 | 47.32   | 31.94   | 41.59   | 10.83   | 28.14   | 15.51   | 1.1510 | 0.00810319 |
| gene:Sme2.5_00735.1_g00002.1 | 619.77  | 377.61  | 494.33  | 206.94  | 237.03  | 227.41  | 1.1520 | 5.68E-09   |
| gene:Sme2.5_00427.1_g00004.1 | 292.14  | 209.47  | 257.09  | 94.26   | 116.89  | 128.18  | 1.1603 | 1.46E-08   |
| gene:Sme2.5_00127.1_g00023.1 | 165.64  | 147.47  | 180.53  | 70.42   | 76.85   | 73.39   | 1.1616 | 8.23E-09   |
| gene:Sme2.5_00606.1_g00011.1 | 47.32   | 27.24   | 44.42   | 17.34   | 12.99   | 22.74   | 1.1629 | 0.00541961 |
| novel.3003                   | 111.94  | 81.72   | 95.46   | 45.50   | 46.54   | 37.21   | 1.1633 | 1.06E-05   |
| gene:Sme2.5_06209.1_g00002.1 | 86.46   | 120.23  | 87.90   | 47.67   | 53.03   | 31.01   | 1.1633 | 6.88E-05   |

|                              |          |          |          |          |          |          |        |            |
|------------------------------|----------|----------|----------|----------|----------|----------|--------|------------|
| gene:Sme2.5_02969.1_g00006.1 | 298.51   | 232.01   | 249.53   | 71.51    | 150.45   | 126.11   | 1.1640 | 6.60E-06   |
| gene:Sme2.5_03678.1_g00012.1 | 2477.26  | 2719.36  | 2601.14  | 1018.43  | 1337.78  | 1123.63  | 1.1641 | 3.39E-20   |
| gene:Sme2.5_00125.1_g00002.1 | 34.58    | 36.63    | 38.75    | 18.42    | 15.15    | 15.51    | 1.1643 | 0.00237579 |
| gene:Sme2.5_05139.1_g00001.1 | 167.46   | 130.57   | 145.56   | 48.75    | 71.43    | 77.53    | 1.1647 | 1.34E-06   |
| novel.2279                   | 29.12    | 36.63    | 25.52    | 14.08    | 19.48    | 7.24     | 1.1660 | 0.01353204 |
| gene:Sme2.5_11392.1_g00002.1 | 357.67   | 300.59   | 326.09   | 118.10   | 179.67   | 140.58   | 1.1674 | 6.97E-10   |
| gene:Sme2.5_01054.1_g00002.1 | 42.77    | 28.18    | 46.31    | 14.08    | 18.40    | 19.64    | 1.1686 | 0.00369468 |
| gene:Sme2.5_12070.1_g00007.1 | 70.99    | 71.39    | 63.33    | 23.84    | 30.31    | 37.21    | 1.1689 | 9.73E-05   |
| gene:Sme2.5_06156.1_g00003.1 | 30.03    | 26.30    | 30.25    | 18.42    | 11.91    | 8.27     | 1.1696 | 0.01065659 |
| gene:Sme2.5_03529.1_g00012.1 | 98.29    | 88.30    | 88.85    | 30.34    | 46.54    | 45.48    | 1.1697 | 1.33E-05   |
| gene:Sme2.5_00776.1_g00003.1 | 328.54   | 269.59   | 300.57   | 111.59   | 145.03   | 142.65   | 1.1701 | 4.19E-11   |
| gene:Sme2.5_17758.1_g00001.1 | 270.30   | 320.31   | 276.94   | 110.51   | 162.35   | 112.67   | 1.1707 | 3.39E-09   |
| gene:Sme2.5_00142.1_g00005.1 | 471.43   | 321.25   | 349.72   | 186.35   | 156.94   | 164.36   | 1.1707 | 1.05E-09   |
| gene:Sme2.5_03546.1_g00008.1 | 354.02   | 228.26   | 310.96   | 109.43   | 160.19   | 127.14   | 1.1712 | 1.60E-07   |
| novel.1690                   | 760.84   | 664.11   | 628.54   | 226.44   | 418.87   | 266.69   | 1.1713 | 8.06E-08   |
| gene:Sme2.5_00447.1_g00001.1 | 1137.61  | 964.69   | 999.06   | 348.87   | 605.03   | 422.78   | 1.1719 | 2.17E-09   |
| gene:Sme2.5_00015.1_g00014.1 | 31.85    | 39.45    | 34.03    | 17.34    | 7.58     | 21.71    | 1.1720 | 0.00856286 |
| gene:Sme2.5_13293.1_g00001.1 | 280.31   | 346.61   | 294.90   | 98.59    | 165.60   | 144.72   | 1.1722 | 3.01E-08   |
| novel.866                    | 928.29   | 509.12   | 787.33   | 308.78   | 374.49   | 303.91   | 1.1725 | 7.01E-08   |
| gene:Sme2.5_03916.1_g00006.1 | 322.17   | 468.73   | 398.87   | 163.60   | 185.08   | 178.83   | 1.1730 | 9.72E-11   |
| gene:Sme2.5_16905.1_g00001.1 | 92.83    | 59.18    | 81.29    | 37.92    | 34.64    | 31.01    | 1.1731 | 9.62E-05   |
| gene:Sme2.5_01650.1_g00001.1 | 41560.16 | 48967.32 | 46701.34 | 14665.46 | 25988.23 | 20187.03 | 1.1735 | 4.52E-10   |
| gene:Sme2.5_01294.1_g00003.1 | 437.75   | 276.16   | 362.95   | 143.01   | 156.94   | 176.76   | 1.1754 | 9.73E-09   |
| gene:Sme2.5_00474.1_g00018.1 | 102.84   | 90.18    | 109.64   | 30.34    | 46.54    | 56.85    | 1.1760 | 2.92E-05   |
| gene:Sme2.5_03063.1_g00003.1 | 720.79   | 653.77   | 731.57   | 228.61   | 422.12   | 281.16   | 1.1766 | 2.12E-08   |
| gene:Sme2.5_01410.1_g00011.1 | 96.47    | 109.90   | 114.37   | 19.50    | 75.76    | 46.52    | 1.1776 | 0.00248178 |
| gene:Sme2.5_01517.1_g00006.1 | 300.33   | 265.83   | 255.20   | 105.09   | 126.63   | 131.28   | 1.1776 | 1.34E-11   |
| novel.1656                   | 260.29   | 225.44   | 237.24   | 99.68    | 106.07   | 113.71   | 1.1780 | 9.05E-12   |
| novel.82                     | 556.97   | 629.35   | 569.00   | 222.11   | 297.65   | 255.32   | 1.1793 | 3.30E-15   |
| gene:Sme2.5_01033.1_g00007.1 | 32.76    | 31.94    | 41.59    | 15.17    | 15.15    | 16.54    | 1.1804 | 0.00290038 |

|                              |         |         |         |         |         |         |        |            |
|------------------------------|---------|---------|---------|---------|---------|---------|--------|------------|
| gene:Sme2.5_01071.1_g00003.1 | 78.27   | 76.09   | 70.89   | 40.09   | 33.55   | 25.84   | 1.1815 | 4.09E-05   |
| gene:Sme2.5_08163.1_g00003.1 | 45.50   | 38.51   | 49.15   | 22.75   | 18.40   | 17.57   | 1.1824 | 0.00098682 |
| gene:Sme2.5_01758.1_g00009.1 | 88.28   | 65.75   | 66.16   | 36.84   | 29.22   | 31.01   | 1.1829 | 6.73E-05   |
| gene:Sme2.5_02745.1_g00009.1 | 51.88   | 58.24   | 42.53   | 16.25   | 30.31   | 20.67   | 1.1839 | 0.00113286 |
| gene:Sme2.5_11638.1_g00002.1 | 676.20  | 618.08  | 602.08  | 313.11  | 276.00  | 246.02  | 1.1839 | 2.67E-17   |
| gene:Sme2.5_04349.1_g00003.1 | 32.76   | 36.63   | 22.68   | 16.25   | 11.91   | 12.40   | 1.1842 | 0.00741184 |
| gene:Sme2.5_00100.1_g00019.1 | 40.04   | 30.06   | 46.31   | 16.25   | 17.32   | 17.57   | 1.1863 | 0.0024001  |
| gene:Sme2.5_00057.1_g00020.1 | 85.55   | 60.12   | 69.94   | 30.34   | 27.06   | 37.21   | 1.1873 | 9.57E-05   |
| gene:Sme2.5_03037.1_g00004.1 | 181.11  | 142.78  | 213.61  | 42.25   | 119.06  | 74.43   | 1.1892 | 0.00033682 |
| gene:Sme2.5_30391.1_g00001.1 | 984.72  | 978.78  | 1075.61 | 331.53  | 564.99  | 436.22  | 1.1893 | 1.23E-10   |
| gene:Sme2.5_00235.1_g00014.1 | 62.80   | 57.30   | 54.82   | 22.75   | 27.06   | 26.88   | 1.1894 | 0.00013041 |
| gene:Sme2.5_00295.1_g00017.1 | 156.54  | 128.69  | 128.54  | 63.92   | 58.45   | 58.92   | 1.1913 | 5.68E-08   |
| gene:Sme2.5_00078.1_g00009.1 | 277.58  | 302.46  | 318.53  | 89.93   | 173.18  | 130.25  | 1.1917 | 1.80E-07   |
| novel.1862                   | 840.01  | 751.46  | 743.86  | 232.94  | 443.76  | 345.25  | 1.1923 | 1.50E-08   |
| gene:Sme2.5_03596.1_g00004.1 | 3127.98 | 2978.62 | 2985.82 | 1472.40 | 1043.38 | 1461.64 | 1.1927 | 3.69E-16   |
| gene:Sme2.5_08423.1_g00001.1 | 115.58  | 95.81   | 100.19  | 46.59   | 40.05   | 49.62   | 1.1928 | 1.29E-06   |
| novel.1209                   | 50.05   | 35.69   | 43.48   | 23.84   | 15.15   | 17.57   | 1.1934 | 0.00161081 |
| gene:Sme2.5_00925.1_g00013.1 | 400.44  | 295.89  | 334.59  | 124.60  | 164.52  | 161.26  | 1.1946 | 2.28E-10   |
| gene:Sme2.5_02393.1_g00008.1 | 138.33  | 85.48   | 124.76  | 37.92   | 58.45   | 55.82   | 1.1953 | 3.00E-05   |
| gene:Sme2.5_00990.1_g00005.1 | 4778.88 | 5048.90 | 5281.67 | 1957.78 | 2598.71 | 2041.55 | 1.1954 | 9.30E-20   |
| gene:Sme2.5_06434.1_g00007.1 | 509.65  | 414.24  | 460.30  | 153.85  | 248.94  | 201.57  | 1.1957 | 5.20E-10   |
| gene:Sme2.5_07789.1_g00001.1 | 3131.62 | 3601.39 | 3216.45 | 1466.98 | 1517.45 | 1358.27 | 1.1961 | 2.18E-30   |
| gene:Sme2.5_00750.1_g00011.1 | 54.61   | 25.36   | 39.70   | 22.75   | 12.99   | 16.54   | 1.1962 | 0.00682295 |
| gene:Sme2.5_03838.1_g00005.1 | 81.00   | 103.33  | 94.52   | 24.92   | 59.53   | 37.21   | 1.1968 | 0.0002459  |
| gene:Sme2.5_00236.1_g00001.1 | 7248.87 | 5438.73 | 6079.40 | 2958.88 | 2528.36 | 2689.67 | 1.1986 | 2.45E-19   |
| gene:Sme2.5_11494.1_g00003.1 | 902.81  | 758.04  | 791.12  | 332.62  | 403.72  | 330.78  | 1.2007 | 1.05E-17   |
| gene:Sme2.5_16184.1_g00004.1 | 38.22   | 65.75   | 45.37   | 16.25   | 21.65   | 26.88   | 1.2022 | 0.00171766 |
| gene:Sme2.5_09386.1_g00004.1 | 60.07   | 84.54   | 67.11   | 10.83   | 56.28   | 24.81   | 1.2042 | 0.01157972 |
| gene:Sme2.5_05633.1_g00002.1 | 101.02  | 114.60  | 81.29   | 47.67   | 32.47   | 48.58   | 1.2047 | 1.48E-05   |
| novel.152                    | 30.03   | 30.06   | 28.36   | 7.58    | 17.32   | 13.44   | 1.2054 | 0.00776817 |

|                              |         |         |         |         |         |         |        |            |
|------------------------------|---------|---------|---------|---------|---------|---------|--------|------------|
| gene:Sme2.5_02490.1_g00008.1 | 627.96  | 543.87  | 591.68  | 202.60  | 317.13  | 244.99  | 1.2057 | 1.21E-11   |
| novel.381                    | 721.70  | 672.56  | 617.20  | 261.11  | 347.43  | 263.59  | 1.2061 | 8.60E-15   |
| gene:Sme2.5_00655.1_g00003.1 | 239.35  | 194.44  | 248.58  | 93.18   | 113.65  | 88.90   | 1.2072 | 8.49E-10   |
| gene:Sme2.5_04427.1_g00004.1 | 128.32  | 120.23  | 118.15  | 50.92   | 55.20   | 52.72   | 1.2073 | 4.79E-08   |
| gene:Sme2.5_02490.1_g00009.1 | 246.63  | 231.08  | 238.19  | 82.34   | 114.73  | 112.67  | 1.2080 | 1.08E-10   |
| gene:Sme2.5_01728.1_g00008.1 | 629.78  | 660.35  | 672.02  | 212.35  | 337.69  | 298.74  | 1.2087 | 5.17E-12   |
| gene:Sme2.5_01399.1_g00007.1 | 1164.00 | 1144.11 | 1209.83 | 556.89  | 474.07  | 491.01  | 1.2089 | 6.04E-27   |
| gene:Sme2.5_06133.1_g00003.1 | 2192.41 | 1633.50 | 1810.02 | 430.13  | 1244.70 | 762.87  | 1.2092 | 0.00575312 |
| gene:Sme2.5_00487.1_g00003.1 | 231.16  | 241.41  | 256.14  | 101.84  | 92.00   | 120.94  | 1.2095 | 1.67E-11   |
| gene:Sme2.5_00575.1_g00002.1 | 827.27  | 644.38  | 774.10  | 396.54  | 277.08  | 296.67  | 1.2111 | 3.89E-12   |
| gene:Sme2.5_01332.1_g00005.1 | 31.85   | 28.18   | 35.92   | 13.00   | 7.58    | 20.67   | 1.2129 | 0.00855504 |
| gene:Sme2.5_06832.1_g00001.1 | 1002.92 | 764.62  | 910.21  | 379.20  | 380.99  | 394.87  | 1.2131 | 2.59E-18   |
| gene:Sme2.5_00173.1_g00017.1 | 23.66   | 29.12   | 38.75   | 7.58    | 18.40   | 13.44   | 1.2141 | 0.01068423 |
| gene:Sme2.5_04620.1_g00003.1 | 77.36   | 77.96   | 72.78   | 20.59   | 53.03   | 24.81   | 1.2142 | 0.00083266 |
| gene:Sme2.5_00632.1_g00021.1 | 63.71   | 48.85   | 57.66   | 17.34   | 23.81   | 32.04   | 1.2149 | 0.00043578 |
| gene:Sme2.5_00169.1_g00006.1 | 526.03  | 488.45  | 525.52  | 204.77  | 240.28  | 218.11  | 1.2156 | 1.49E-19   |
| gene:Sme2.5_30617.1_g00001.1 | 310.34  | 236.71  | 248.58  | 124.60  | 117.98  | 100.27  | 1.2159 | 1.77E-10   |
| gene:Sme2.5_06812.1_g00003.1 | 88.28   | 122.11  | 102.08  | 22.75   | 68.19   | 43.42   | 1.2175 | 0.00065402 |
| gene:Sme2.5_01586.1_g00001.1 | 105.57  | 101.45  | 90.74   | 58.51   | 29.22   | 40.31   | 1.2182 | 2.73E-05   |
| gene:Sme2.5_00512.1_g00007.1 | 113.76  | 74.21   | 92.63   | 46.59   | 40.05   | 34.11   | 1.2185 | 1.97E-05   |
| gene:Sme2.5_20003.1_g00001.1 | 49.14   | 36.63   | 30.25   | 8.67    | 15.15   | 25.84   | 1.2204 | 0.00830195 |
| gene:Sme2.5_01216.1_g00015.1 | 157.45  | 106.14  | 133.27  | 55.26   | 51.95   | 63.06   | 1.2205 | 7.20E-07   |
| gene:Sme2.5_02408.1_g00008.1 | 81.00   | 102.39  | 104.91  | 34.67   | 46.54   | 42.38   | 1.2211 | 4.27E-06   |
| gene:Sme2.5_04646.1_g00003.1 | 2718.44 | 2137.92 | 2460.30 | 1003.27 | 1085.59 | 1049.20 | 1.2214 | 5.88E-24   |
| gene:Sme2.5_03686.1_g00007.1 | 38.22   | 38.51   | 57.66   | 16.25   | 23.81   | 17.57   | 1.2215 | 0.00149851 |
| gene:Sme2.5_00036.1_g00029.1 | 2027.68 | 1209.86 | 1585.07 | 814.75  | 576.89  | 676.04  | 1.2219 | 1.37E-09   |
| gene:Sme2.5_08462.1_g00001.1 | 26.39   | 31.00   | 32.14   | 18.42   | 6.49    | 13.44   | 1.2222 | 0.00957145 |
| novel.2192                   | 44.59   | 43.21   | 46.31   | 18.42   | 16.24   | 22.74   | 1.2223 | 0.00059168 |
| gene:Sme2.5_14895.1_g00001.1 | 131.05  | 135.26  | 161.63  | 66.09   | 55.20   | 62.02   | 1.2226 | 2.73E-08   |
| gene:Sme2.5_03977.1_g00003.1 | 305.79  | 216.05  | 260.87  | 108.34  | 134.21  | 93.03   | 1.2231 | 8.24E-09   |

|                              |         |         |         |        |        |        |        |            |
|------------------------------|---------|---------|---------|--------|--------|--------|--------|------------|
| gene:Sme2.5_01578.1_g00007.1 | 286.68  | 224.50  | 242.91  | 89.93  | 122.31 | 110.61 | 1.2240 | 3.24E-10   |
| gene:Sme2.5_04368.1_g00001.1 | 391.34  | 249.86  | 308.13  | 125.68 | 149.36 | 131.28 | 1.2248 | 2.99E-09   |
| gene:Sme2.5_04228.1_g00011.1 | 48.23   | 25.36   | 38.75   | 19.50  | 16.24  | 12.40  | 1.2258 | 0.00447449 |
| gene:Sme2.5_01216.1_g00016.1 | 361.31  | 289.31  | 306.24  | 133.26 | 155.86 | 119.91 | 1.2272 | 5.15E-12   |
| gene:Sme2.5_07604.1_g00004.1 | 76.45   | 145.60  | 103.02  | 41.17  | 53.03  | 44.45  | 1.2289 | 5.40E-05   |
| novel.1397                   | 1886.62 | 1946.29 | 2072.78 | 656.57 | 988.18 | 873.47 | 1.2296 | 2.80E-15   |
| gene:Sme2.5_00250.1_g00005.1 | 681.66  | 667.86  | 720.23  | 204.77 | 377.74 | 299.77 | 1.2301 | 1.36E-09   |
| gene:Sme2.5_12538.1_g00002.1 | 106.48  | 84.54   | 76.56   | 39.00  | 38.96  | 36.18  | 1.2303 | 6.64E-06   |
| gene:Sme2.5_02714.1_g00002.1 | 31.85   | 40.39   | 42.53   | 9.75   | 17.32  | 21.71  | 1.2305 | 0.00322582 |
| gene:Sme2.5_00420.1_g00012.1 | 1867.50 | 1487.90 | 1839.32 | 751.91 | 759.81 | 700.85 | 1.2315 | 2.56E-22   |
| gene:Sme2.5_01754.1_g00001.1 | 352.20  | 322.19  | 329.87  | 100.76 | 159.10 | 167.46 | 1.2319 | 1.17E-09   |
| gene:Sme2.5_00064.1_g00024.1 | 91.92   | 88.30   | 72.78   | 32.50  | 38.96  | 36.18  | 1.2331 | 5.86E-06   |
| gene:Sme2.5_05415.1_g00005.1 | 42.77   | 51.66   | 35.92   | 20.59  | 17.32  | 17.57  | 1.2332 | 0.00089076 |
| gene:Sme2.5_05566.1_g00002.1 | 80.09   | 89.24   | 91.68   | 33.59  | 44.38  | 33.08  | 1.2337 | 4.48E-06   |
| gene:Sme2.5_01098.1_g00002.1 | 107.39  | 83.60   | 84.12   | 42.25  | 27.06  | 47.55  | 1.2339 | 2.46E-05   |
| gene:Sme2.5_05628.1_g00006.1 | 555.15  | 365.40  | 526.47  | 170.10 | 244.61 | 200.54 | 1.2340 | 3.10E-09   |
| novel.1816                   | 408.63  | 391.70  | 384.69  | 148.43 | 194.82 | 160.22 | 1.2353 | 2.26E-15   |
| gene:Sme2.5_00858.1_g00003.1 | 1261.38 | 1139.41 | 1172.02 | 369.45 | 587.71 | 559.23 | 1.2362 | 2.15E-12   |
| gene:Sme2.5_18845.1_g00002.1 | 128.32  | 125.87  | 140.83  | 56.34  | 57.36  | 53.75  | 1.2384 | 1.06E-08   |
| gene:Sme2.5_03590.1_g00007.1 | 127.41  | 131.51  | 151.23  | 50.92  | 63.86  | 58.92  | 1.2390 | 2.44E-08   |
| gene:Sme2.5_09553.1_g00003.1 | 55.52   | 44.15   | 82.23   | 41.17  | 17.32  | 18.61  | 1.2400 | 0.00331737 |
| gene:Sme2.5_00629.1_g00013.1 | 140.15  | 126.81  | 136.11  | 62.84  | 55.20  | 52.72  | 1.2400 | 1.08E-08   |
| gene:Sme2.5_05161.1_g00006.1 | 24.57   | 27.24   | 41.59   | 13.00  | 16.24  | 10.34  | 1.2401 | 0.00655862 |
| gene:Sme2.5_13480.1_g00001.1 | 235.71  | 159.69  | 196.60  | 78.01  | 87.67  | 84.76  | 1.2415 | 9.34E-09   |
| gene:Sme2.5_04394.1_g00002.1 | 1021.12 | 854.79  | 934.78  | 330.45 | 452.42 | 405.21 | 1.2423 | 1.21E-16   |
| gene:Sme2.5_00243.1_g00003.1 | 495.09  | 396.40  | 425.33  | 170.10 | 201.32 | 185.03 | 1.2430 | 2.52E-15   |
| gene:Sme2.5_00788.1_g00011.1 | 30.03   | 22.54   | 25.52   | 8.67   | 10.82  | 13.44  | 1.2440 | 0.0079401  |
| gene:Sme2.5_01404.1_g00002.1 | 296.69  | 285.56  | 278.83  | 107.26 | 134.21 | 121.98 | 1.2444 | 3.48E-14   |
| gene:Sme2.5_12199.1_g00001.1 | 37.31   | 44.15   | 65.22   | 14.08  | 27.06  | 20.67  | 1.2456 | 0.00183858 |
| gene:Sme2.5_00250.1_g00007.1 | 782.68  | 731.74  | 721.17  | 299.03 | 313.88 | 329.75 | 1.2456 | 6.00E-26   |

|                              |         |         |         |        |         |         |        |            |
|------------------------------|---------|---------|---------|--------|---------|---------|--------|------------|
| gene:Sme2.5_08266.1_g00003.1 | 294.87  | 178.47  | 229.68  | 147.35 | 53.03   | 96.13   | 1.2458 | 0.00016044 |
| gene:Sme2.5_31511.1_g00001.1 | 163.82  | 132.45  | 161.63  | 53.09  | 80.09   | 59.95   | 1.2461 | 9.71E-08   |
| gene:Sme2.5_00374.1_g00002.1 | 2057.71 | 1316.94 | 1826.09 | 909.01 | 571.48  | 712.22  | 1.2461 | 1.60E-09   |
| gene:Sme2.5_02429.1_g00003.1 | 211.14  | 211.35  | 251.42  | 91.01  | 80.09   | 112.67  | 1.2461 | 4.17E-10   |
| gene:Sme2.5_21838.1_g00001.1 | 71.90   | 83.60   | 69.94   | 39.00  | 28.14   | 27.91   | 1.2471 | 1.93E-05   |
| gene:Sme2.5_01723.1_g00001.1 | 612.49  | 535.42  | 539.70  | 164.68 | 309.55  | 236.72  | 1.2472 | 4.36E-09   |
| gene:Sme2.5_01443.1_g00002.1 | 2374.42 | 2027.08 | 2307.18 | 786.58 | 1066.11 | 969.61  | 1.2491 | 4.40E-19   |
| novel.101                    | 156.54  | 112.72  | 98.30   | 71.51  | 34.64   | 48.58   | 1.2492 | 6.52E-05   |
| gene:Sme2.5_00521.1_g00008.1 | 141.06  | 130.57  | 154.06  | 58.51  | 54.12   | 66.16   | 1.2505 | 8.32E-09   |
| gene:Sme2.5_00398.1_g00017.1 | 38.22   | 33.82   | 39.70   | 7.58   | 25.98   | 13.44   | 1.2506 | 0.00704046 |
| gene:Sme2.5_00499.1_g00007.1 | 47.32   | 45.09   | 39.70   | 22.75  | 18.40   | 14.47   | 1.2508 | 0.0006681  |
| gene:Sme2.5_17811.1_g00002.1 | 60.98   | 61.06   | 79.40   | 23.84  | 44.38   | 16.54   | 1.2516 | 0.00100187 |
| gene:Sme2.5_00398.1_g00032.1 | 162.00  | 186.93  | 156.90  | 81.26  | 70.35   | 60.99   | 1.2517 | 2.65E-09   |
| gene:Sme2.5_00243.1_g00015.1 | 612.49  | 508.18  | 570.89  | 249.19 | 231.62  | 229.48  | 1.2522 | 1.37E-19   |
| gene:Sme2.5_04427.1_g00002.1 | 370.41  | 323.13  | 314.74  | 140.85 | 143.95  | 138.52  | 1.2526 | 1.11E-15   |
| gene:Sme2.5_03748.1_g00003.1 | 427.74  | 317.49  | 352.55  | 126.76 | 189.41  | 144.72  | 1.2526 | 3.97E-10   |
| gene:Sme2.5_16123.1_g00003.1 | 23.66   | 35.69   | 32.14   | 7.58   | 17.32   | 13.44   | 1.2534 | 0.00718534 |
| gene:Sme2.5_30841.1_g00001.1 | 188.39  | 189.74  | 210.78  | 63.92  | 86.59   | 96.13   | 1.2540 | 1.55E-09   |
| gene:Sme2.5_20042.1_g00001.1 | 550.60  | 414.24  | 510.40  | 191.77 | 190.49  | 235.68  | 1.2548 | 1.55E-13   |
| gene:Sme2.5_00024.1_g00029.1 | 255.74  | 205.71  | 229.68  | 96.43  | 112.56  | 80.63   | 1.2563 | 2.29E-10   |
| gene:Sme2.5_01486.1_g00010.1 | 65.53   | 106.14  | 85.07   | 17.34  | 47.62   | 42.38   | 1.2565 | 0.00079545 |
| gene:Sme2.5_06630.1_g00005.1 | 35.49   | 38.51   | 22.68   | 14.08  | 9.74    | 16.54   | 1.2585 | 0.00532909 |
| gene:Sme2.5_01102.1_g00003.1 | 844.56  | 767.43  | 795.84  | 248.11 | 395.06  | 362.83  | 1.2589 | 9.30E-13   |
| gene:Sme2.5_01661.1_g00005.1 | 3223.54 | 2397.17 | 2922.50 | 916.59 | 1436.27 | 1215.63 | 1.2595 | 2.70E-12   |
| gene:Sme2.5_11925.1_g00004.1 | 53.70   | 48.85   | 51.04   | 19.50  | 23.81   | 20.67   | 1.2637 | 0.00014726 |
| gene:Sme2.5_12914.1_g00003.1 | 49.14   | 46.97   | 57.66   | 22.75  | 20.56   | 20.67   | 1.2649 | 0.00016682 |
| novel.1037                   | 41.86   | 22.54   | 37.81   | 6.50   | 18.40   | 17.57   | 1.2654 | 0.01007886 |
| gene:Sme2.5_00141.1_g00001.1 | 1153.08 | 847.28  | 1034.97 | 406.29 | 416.70  | 439.32  | 1.2658 | 3.46E-18   |
| gene:Sme2.5_00108.1_g00018.1 | 1040.23 | 850.09  | 901.70  | 315.28 | 430.77  | 414.51  | 1.2663 | 6.58E-16   |
| novel.1326                   | 867.32  | 943.09  | 879.96  | 282.78 | 466.49  | 369.03  | 1.2665 | 1.22E-12   |

|                              |         |         |         |         |         |         |        |            |
|------------------------------|---------|---------|---------|---------|---------|---------|--------|------------|
| gene:Sme2.5_01239.1_g00013.1 | 182.02  | 197.26  | 215.50  | 104.01  | 56.28   | 86.83   | 1.2666 | 9.76E-08   |
| gene:Sme2.5_00474.1_g00019.1 | 536.04  | 412.37  | 466.92  | 160.35  | 251.10  | 176.76  | 1.2672 | 1.88E-10   |
| gene:Sme2.5_12340.1_g00001.1 | 212.05  | 224.50  | 209.83  | 82.34   | 92.00   | 94.07   | 1.2674 | 1.03E-12   |
| gene:Sme2.5_24170.1_g00001.1 | 188.39  | 196.32  | 202.27  | 84.51   | 64.94   | 94.07   | 1.2678 | 2.81E-10   |
| gene:Sme2.5_10090.1_g00002.1 | 744.45  | 688.53  | 724.95  | 203.69  | 388.56  | 303.91  | 1.2678 | 1.37E-09   |
| novel.126                    | 100.11  | 100.51  | 100.19  | 36.84   | 51.95   | 36.18   | 1.2686 | 8.09E-07   |
| gene:Sme2.5_00347.1_g00013.1 | 39.13   | 33.82   | 42.53   | 17.34   | 11.91   | 18.61   | 1.2693 | 0.0012594  |
| gene:Sme2.5_13547.1_g00003.1 | 1120.32 | 900.82  | 989.60  | 335.87  | 480.56  | 432.08  | 1.2699 | 4.57E-15   |
| gene:Sme2.5_12975.1_g00003.1 | 266.66  | 237.65  | 258.98  | 134.35  | 73.60   | 108.54  | 1.2700 | 1.14E-08   |
| gene:Sme2.5_12190.1_g00001.1 | 127.41  | 90.18   | 99.24   | 47.67   | 47.62   | 36.18   | 1.2712 | 2.13E-06   |
| novel.2732                   | 186.57  | 168.14  | 125.71  | 53.09   | 94.16   | 51.68   | 1.2735 | 8.26E-06   |
| gene:Sme2.5_16470.1_g00001.1 | 4984.56 | 5028.24 | 4976.37 | 1564.49 | 2485.07 | 2146.98 | 1.2744 | 3.69E-15   |
| gene:Sme2.5_00297.1_g00020.1 | 1173.11 | 1288.76 | 1144.61 | 426.88  | 618.02  | 445.52  | 1.2751 | 2.08E-15   |
| gene:Sme2.5_10732.1_g00001.1 | 262.11  | 57.30   | 191.87  | 60.67   | 79.01   | 71.32   | 1.2771 | 0.00307976 |
| gene:Sme2.5_03471.1_g00002.1 | 125.59  | 110.84  | 122.87  | 34.67   | 64.94   | 48.58   | 1.2779 | 1.56E-06   |
| gene:Sme2.5_03663.1_g00005.1 | 27.30   | 21.60   | 31.19   | 9.75    | 10.82   | 12.40   | 1.2787 | 0.00595951 |
| gene:Sme2.5_05379.1_g00006.1 | 49.14   | 36.63   | 56.71   | 17.34   | 24.89   | 16.54   | 1.2793 | 0.00068537 |
| gene:Sme2.5_00077.1_g00001.1 | 214.78  | 172.84  | 175.80  | 43.34   | 106.07  | 82.70   | 1.2793 | 1.16E-05   |
| novel.878                    | 70.08   | 62.94   | 51.04   | 29.25   | 28.14   | 18.61   | 1.2793 | 0.00011868 |
| gene:Sme2.5_00531.1_g00013.1 | 57.34   | 67.63   | 55.77   | 22.75   | 19.48   | 32.04   | 1.2797 | 0.00010529 |
| gene:Sme2.5_15253.1_g00001.1 | 164.73  | 90.18   | 120.98  | 33.59   | 76.85   | 44.45   | 1.2802 | 0.00021614 |
| gene:Sme2.5_00232.1_g00017.1 | 625.23  | 601.17  | 573.72  | 159.27  | 334.45  | 247.05  | 1.2810 | 2.76E-08   |
| gene:Sme2.5_00345.1_g00018.1 | 77.36   | 82.66   | 91.68   | 27.09   | 45.46   | 31.01   | 1.2819 | 1.11E-05   |
| gene:Sme2.5_08492.1_g00002.1 | 47.32   | 46.97   | 40.64   | 16.25   | 22.73   | 16.54   | 1.2826 | 0.00040575 |
| gene:Sme2.5_03006.1_g00004.1 | 35.49   | 38.51   | 45.37   | 10.83   | 21.65   | 16.54   | 1.2833 | 0.00143812 |
| gene:Sme2.5_14468.1_g00001.1 | 253.92  | 170.02  | 211.72  | 108.34  | 62.78   | 89.93   | 1.2841 | 2.72E-07   |
| gene:Sme2.5_16875.1_g00001.1 | 255.74  | 169.08  | 205.10  | 60.67   | 101.74  | 96.13   | 1.2844 | 3.63E-07   |
| gene:Sme2.5_00401.1_g00021.1 | 613.40  | 634.99  | 672.02  | 230.77  | 303.06  | 254.29  | 1.2850 | 2.32E-19   |
| gene:Sme2.5_05834.1_g00003.1 | 1706.42 | 1204.22 | 1571.83 | 664.15  | 556.33  | 618.15  | 1.2857 | 2.04E-16   |
| gene:Sme2.5_12932.1_g00001.1 | 554.24  | 448.06  | 506.62  | 184.18  | 215.39  | 219.14  | 1.2860 | 3.18E-17   |

|                              |         |         |         |         |         |         |        |            |
|------------------------------|---------|---------|---------|---------|---------|---------|--------|------------|
| gene:Sme2.5_09358.1_g00003.1 | 614.31  | 644.38  | 694.71  | 201.52  | 316.05  | 283.23  | 1.2862 | 2.61E-13   |
| gene:Sme2.5_00044.1_g00026.1 | 62.80   | 48.85   | 70.89   | 22.75   | 34.64   | 17.57   | 1.2866 | 0.00030702 |
| gene:Sme2.5_02798.1_g00003.1 | 1112.13 | 575.81  | 739.13  | 319.62  | 344.19  | 330.78  | 1.2872 | 7.92E-09   |
| gene:Sme2.5_01971.1_g00007.1 | 238.44  | 205.71  | 230.62  | 73.67   | 120.14  | 82.70   | 1.2879 | 3.54E-09   |
| gene:Sme2.5_25728.1_g00002.1 | 84.64   | 31.00   | 74.67   | 35.75   | 18.40   | 23.77   | 1.2892 | 0.00349405 |
| gene:Sme2.5_02334.1_g00001.1 | 83.73   | 108.02  | 118.15  | 22.75   | 56.28   | 47.55   | 1.2904 | 0.00010242 |
| gene:Sme2.5_00984.1_g00001.1 | 520.57  | 471.54  | 533.08  | 232.94  | 178.59  | 211.91  | 1.2906 | 8.78E-18   |
| gene:Sme2.5_01194.1_g00002.1 | 60.98   | 49.78   | 61.44   | 19.50   | 29.22   | 21.71   | 1.2907 | 0.00010198 |
| gene:Sme2.5_00165.1_g00017.1 | 101.93  | 49.78   | 86.01   | 28.17   | 40.05   | 28.94   | 1.2922 | 0.00024155 |
| novel.1189                   | 52.79   | 30.06   | 34.97   | 14.08   | 22.73   | 11.37   | 1.2936 | 0.00332599 |
| novel.2876                   | 57.34   | 57.30   | 73.72   | 9.75    | 43.29   | 23.77   | 1.2941 | 0.00379851 |
| gene:Sme2.5_00673.1_g00011.1 | 4069.92 | 3602.33 | 3965.98 | 1754.09 | 1386.49 | 1604.29 | 1.2944 | 3.65E-27   |
| gene:Sme2.5_00010.1_g00033.1 | 17.29   | 28.18   | 22.68   | 7.58    | 12.99   | 7.24    | 1.2947 | 0.01370951 |
| gene:Sme2.5_04668.1_g00003.1 | 485.08  | 655.65  | 635.16  | 184.18  | 287.90  | 251.19  | 1.2956 | 5.11E-11   |
| gene:Sme2.5_00059.1_g00023.1 | 1489.82 | 1130.95 | 1431.95 | 438.79  | 672.14  | 538.55  | 1.2969 | 5.10E-13   |
| gene:Sme2.5_04153.1_g00001.1 | 508.74  | 266.77  | 444.23  | 215.60  | 111.48  | 168.49  | 1.2995 | 4.47E-06   |
| gene:Sme2.5_00171.1_g00009.1 | 2158.73 | 1455.02 | 1851.61 | 762.74  | 728.42  | 727.72  | 1.3006 | 4.68E-17   |
| gene:Sme2.5_00311.1_g00001.1 | 409.54  | 318.43  | 356.33  | 139.76  | 161.27  | 138.52  | 1.3033 | 1.28E-14   |
| gene:Sme2.5_01426.1_g00002.1 | 814.53  | 845.40  | 793.01  | 356.45  | 281.41  | 355.59  | 1.3036 | 2.59E-22   |
| gene:Sme2.5_02000.1_g00019.1 | 545.14  | 616.20  | 560.49  | 219.94  | 233.79  | 242.92  | 1.3050 | 3.24E-23   |
| gene:Sme2.5_05825.1_g00007.1 | 32.76   | 22.54   | 26.47   | 5.42    | 18.40   | 9.30    | 1.3059 | 0.01281751 |
| gene:Sme2.5_00629.1_g00005.1 | 116.49  | 115.54  | 78.45   | 43.34   | 33.55   | 48.58   | 1.3062 | 4.34E-06   |
| gene:Sme2.5_08629.1_g00001.1 | 450.49  | 380.43  | 411.15  | 165.77  | 151.53  | 184.00  | 1.3085 | 2.44E-17   |
| gene:Sme2.5_09944.1_g00003.1 | 36.40   | 51.66   | 33.08   | 14.08   | 12.99   | 21.71   | 1.3088 | 0.00155702 |
| novel.369                    | 70.99   | 65.75   | 61.44   | 30.34   | 23.81   | 25.84   | 1.3096 | 1.40E-05   |
| gene:Sme2.5_00407.1_g00011.1 | 1086.65 | 709.19  | 808.13  | 293.61  | 397.22  | 359.73  | 1.3096 | 7.33E-12   |
| gene:Sme2.5_13587.1_g00001.1 | 580.64  | 634.99  | 641.78  | 228.61  | 270.59  | 249.12  | 1.3114 | 2.79E-23   |
| gene:Sme2.5_08795.1_g00004.1 | 44.59   | 51.66   | 38.75   | 17.34   | 17.32   | 19.64   | 1.3133 | 0.00030712 |
| gene:Sme2.5_02607.1_g00001.1 | 2690.23 | 1748.09 | 2310.97 | 1026.02 | 819.34  | 869.34  | 1.3141 | 2.74E-14   |
| novel.1764                   | 143.79  | 141.84  | 142.72  | 67.17   | 60.61   | 44.45   | 1.3166 | 6.86E-09   |



|                              |          |          |          |          |         |          |        |            |
|------------------------------|----------|----------|----------|----------|---------|----------|--------|------------|
| gene:Sme2.5_03327.1_g00005.1 | 140.15   | 28.18    | 86.96    | 45.50    | 25.98   | 31.01    | 1.3176 | 0.00844479 |
| gene:Sme2.5_00021.1_g00015.1 | 4613.25  | 3318.66  | 3945.18  | 1405.22  | 1864.88 | 1493.69  | 1.3181 | 1.39E-16   |
| gene:Sme2.5_01802.1_g00008.1 | 21.84    | 21.60    | 28.36    | 5.42     | 14.07   | 9.30     | 1.3182 | 0.01109534 |
| gene:Sme2.5_00736.1_g00014.1 | 175.65   | 200.08   | 191.87   | 59.59    | 108.23  | 59.95    | 1.3183 | 2.60E-07   |
| gene:Sme2.5_06091.1_g00002.1 | 656.17   | 710.13   | 648.39   | 206.94   | 334.45  | 265.66   | 1.3199 | 1.20E-13   |
| gene:Sme2.5_05261.1_g00003.1 | 5415.03  | 3775.17  | 4534.03  | 1541.74  | 2072.69 | 1882.36  | 1.3201 | 8.20E-16   |
| gene:Sme2.5_15228.1_g00002.1 | 142.88   | 134.32   | 100.19   | 39.00    | 53.03   | 58.92    | 1.3209 | 5.32E-07   |
| gene:Sme2.5_00858.1_g00007.1 | 232.07   | 186.93   | 205.10   | 74.76    | 103.91  | 71.32    | 1.3213 | 6.70E-10   |
| gene:Sme2.5_01754.1_g00005.1 | 1862.95  | 1269.98  | 1625.71  | 794.16   | 452.42  | 655.36   | 1.3231 | 5.15E-10   |
| gene:Sme2.5_03468.1_g00002.1 | 34.58    | 26.30    | 33.08    | 10.83    | 18.40   | 8.27     | 1.3290 | 0.00387849 |
| gene:Sme2.5_00606.1_g00004.1 | 33261.96 | 27154.18 | 30404.55 | 15587.46 | 8613.32 | 11926.77 | 1.3299 | 8.61E-12   |
| gene:Sme2.5_16480.1_g00001.1 | 45.50    | 38.51    | 36.86    | 17.34    | 19.48   | 11.37    | 1.3306 | 0.00071979 |
| gene:Sme2.5_00024.1_g00017.1 | 227.52   | 95.81    | 176.75   | 78.01    | 70.35   | 50.65    | 1.3308 | 4.89E-05   |
| gene:Sme2.5_19004.1_g00001.1 | 119.22   | 122.11   | 109.64   | 44.42    | 44.38   | 50.65    | 1.3308 | 1.03E-08   |
| gene:Sme2.5_00264.1_g00013.1 | 23.66    | 24.42    | 18.90    | 6.50     | 9.74    | 10.34    | 1.3320 | 0.0090203  |
| gene:Sme2.5_00099.1_g00022.1 | 156.54   | 318.43   | 229.68   | 99.68    | 95.25   | 84.76    | 1.3331 | 6.50E-07   |
| novel.316                    | 253.00   | 196.32   | 216.45   | 72.59    | 99.58   | 92.00    | 1.3336 | 7.43E-11   |
| gene:Sme2.5_00018.1_g00012.1 | 93.74    | 64.81    | 75.61    | 39.00    | 30.31   | 23.77    | 1.3338 | 2.06E-05   |
| gene:Sme2.5_01475.1_g00005.1 | 245.72   | 214.17   | 192.82   | 69.34    | 127.72  | 62.02    | 1.3345 | 1.22E-06   |
| gene:Sme2.5_02096.1_g00005.1 | 42.77    | 53.54    | 46.31    | 17.34    | 20.56   | 18.61    | 1.3355 | 0.00015695 |
| gene:Sme2.5_00351.1_g00023.1 | 5958.36  | 8636.21  | 7276.00  | 2050.95  | 3775.23 | 2836.46  | 1.3361 | 4.49E-10   |
| gene:Sme2.5_00923.1_g00005.1 | 2665.65  | 2291.97  | 2444.24  | 643.56   | 1355.10 | 932.39   | 1.3365 | 3.13E-09   |
| novel.2023                   | 2473.62  | 2078.74  | 2373.35  | 593.73   | 1310.72 | 837.29   | 1.3369 | 2.04E-08   |
| gene:Sme2.5_00410.1_g00014.1 | 31.85    | 46.03    | 43.48    | 19.50    | 11.91   | 16.54    | 1.3386 | 0.00084911 |
| gene:Sme2.5_03522.1_g00001.1 | 259.38   | 106.14   | 197.54   | 43.34    | 101.74  | 77.53    | 1.3389 | 0.00025774 |
| gene:Sme2.5_12929.1_g00003.1 | 40.95    | 39.45    | 27.41    | 18.42    | 9.74    | 14.47    | 1.3391 | 0.00192797 |
| gene:Sme2.5_03893.1_g00002.1 | 31.85    | 40.39    | 33.08    | 15.17    | 14.07   | 12.40    | 1.3396 | 0.00102921 |
| gene:Sme2.5_00442.1_g00008.1 | 966.52   | 791.86   | 883.74   | 364.04   | 349.60  | 329.75   | 1.3408 | 4.05E-25   |
| gene:Sme2.5_02731.1_g00004.1 | 6474.38  | 4453.37  | 5622.88  | 2319.65  | 2001.26 | 2204.87  | 1.3427 | 3.13E-19   |
| novel.933                    | 43.68    | 59.18    | 54.82    | 26.00    | 25.98   | 10.34    | 1.3433 | 0.00074296 |

|                              |          |          |          |         |          |         |        |            |
|------------------------------|----------|----------|----------|---------|----------|---------|--------|------------|
| gene:Sme2.5_00669.1_g00017.1 | 59.16    | 40.39    | 60.49    | 29.25   | 19.48    | 14.47   | 1.3435 | 0.00044136 |
| gene:Sme2.5_12436.1_g00002.1 | 12803.14 | 8420.16  | 10764.65 | 4961.08 | 3449.44  | 4192.67 | 1.3438 | 1.05E-13   |
| gene:Sme2.5_01341.1_g00012.1 | 218.42   | 192.56   | 184.31   | 89.93   | 67.11    | 77.53   | 1.3441 | 2.17E-11   |
| gene:Sme2.5_05415.1_g00006.1 | 53.70    | 77.03    | 48.20    | 21.67   | 27.06    | 21.71   | 1.3455 | 0.00010897 |
| gene:Sme2.5_01393.1_g00004.1 | 1717.34  | 1641.95  | 1672.97  | 488.63  | 831.24   | 658.46  | 1.3469 | 5.12E-14   |
| gene:Sme2.5_02557.1_g00010.1 | 541.50   | 296.83   | 469.75   | 205.85  | 120.14   | 188.13  | 1.3472 | 2.72E-07   |
| gene:Sme2.5_00333.1_g00014.1 | 30.94    | 17.85    | 21.74    | 7.58    | 11.91    | 8.27    | 1.3476 | 0.00959075 |
| gene:Sme2.5_02333.1_g00003.1 | 17946.97 | 25489.68 | 21276.00 | 4589.46 | 12522.75 | 8277.83 | 1.3498 | 0.00120895 |
| gene:Sme2.5_08759.1_g00004.1 | 81.00    | 62.94    | 84.12    | 20.59   | 32.47    | 36.18   | 1.3517 | 1.88E-05   |
| gene:Sme2.5_10058.1_g00006.1 | 696.22   | 588.02   | 846.88   | 169.02  | 390.73   | 274.96  | 1.3523 | 3.24E-07   |
| gene:Sme2.5_31299.1_g00001.1 | 191.12   | 156.87   | 163.52   | 60.67   | 72.52    | 67.19   | 1.3523 | 7.96E-11   |
| gene:Sme2.5_18160.1_g00001.1 | 167.46   | 145.60   | 150.28   | 43.34   | 81.18    | 56.85   | 1.3538 | 8.99E-08   |
| gene:Sme2.5_00165.1_g00019.1 | 68.26    | 55.42    | 69.94    | 26.00   | 27.06    | 22.74   | 1.3542 | 1.33E-05   |
| gene:Sme2.5_02795.1_g00004.1 | 219.33   | 133.38   | 177.69   | 46.59   | 81.18    | 79.59   | 1.3545 | 1.27E-06   |
| gene:Sme2.5_24356.1_g00001.1 | 1767.39  | 1517.96  | 1700.38  | 589.39  | 750.07   | 609.88  | 1.3550 | 2.69E-24   |
| novel.107                    | 1410.64  | 1378.00  | 1373.35  | 505.97  | 612.61   | 506.51  | 1.3570 | 8.34E-31   |
| gene:Sme2.5_09303.1_g00001.1 | 1657.27  | 840.70   | 1214.56  | 757.33  | 252.19   | 439.32  | 1.3576 | 0.00882792 |
| gene:Sme2.5_00810.1_g00016.1 | 2133.25  | 2085.31  | 2116.26  | 671.73  | 977.36   | 819.72  | 1.3595 | 4.89E-21   |
| gene:Sme2.5_12421.1_g00004.1 | 42.77    | 33.82    | 33.08    | 7.58    | 24.89    | 10.34   | 1.3598 | 0.00503007 |
| gene:Sme2.5_08458.1_g00001.1 | 5822.75  | 4272.08  | 5146.51  | 2512.50 | 1411.38  | 2007.44 | 1.3616 | 1.73E-11   |
| gene:Sme2.5_03933.1_g00002.1 | 237.53   | 231.08   | 246.69   | 75.84   | 103.91   | 98.20   | 1.3631 | 2.17E-13   |
| gene:Sme2.5_04716.1_g00001.1 | 376.78   | 352.25   | 362.00   | 126.76  | 179.67   | 117.84  | 1.3637 | 2.75E-13   |
| gene:Sme2.5_04456.1_g00002.1 | 297.60   | 192.56   | 253.31   | 126.76  | 63.86    | 98.20   | 1.3643 | 3.65E-07   |
| gene:Sme2.5_03755.1_g00001.1 | 150.16   | 119.30   | 118.15   | 34.67   | 70.35    | 45.48   | 1.3658 | 1.95E-06   |
| gene:Sme2.5_00002.1_g00011.1 | 129.23   | 81.72    | 123.82   | 22.75   | 57.36    | 49.62   | 1.3669 | 8.22E-05   |
| gene:Sme2.5_00367.1_g00011.1 | 52.79    | 45.09    | 36.86    | 14.08   | 21.65    | 16.54   | 1.3673 | 0.00033743 |
| gene:Sme2.5_19880.1_g00001.1 | 77.36    | 76.09    | 66.16    | 28.17   | 19.48    | 37.21   | 1.3688 | 1.57E-05   |
| gene:Sme2.5_00407.1_g00012.1 | 204.77   | 118.36   | 130.43   | 54.17   | 51.95    | 69.26   | 1.3703 | 1.02E-06   |
| gene:Sme2.5_00345.1_g00024.1 | 144.70   | 145.60   | 123.82   | 59.59   | 58.45    | 42.38   | 1.3704 | 4.80E-09   |
| gene:Sme2.5_02659.1_g00005.1 | 89.19    | 84.54    | 93.57    | 27.09   | 41.13    | 35.15   | 1.3705 | 5.63E-07   |

|                              |          |          |          |         |         |         |        |            |
|------------------------------|----------|----------|----------|---------|---------|---------|--------|------------|
| gene:Sme2.5_04861.1_g00003.1 | 76.45    | 105.21   | 64.27    | 31.42   | 35.72   | 27.91   | 1.3725 | 1.10E-05   |
| gene:Sme2.5_00867.1_g00006.1 | 1306.89  | 799.37   | 1126.65  | 404.12  | 453.50  | 389.70  | 1.3742 | 1.76E-13   |
| gene:Sme2.5_00139.1_g00003.1 | 72.81    | 31.94    | 83.18    | 30.34   | 17.32   | 24.81   | 1.3749 | 0.00132843 |
| gene:Sme2.5_00009.1_g00020.1 | 2073.18  | 1581.83  | 1860.11  | 777.91  | 665.64  | 683.27  | 1.3749 | 1.20E-23   |
| gene:Sme2.5_02351.1_g00003.1 | 785.41   | 761.80   | 821.36   | 289.28  | 338.77  | 285.30  | 1.3751 | 7.94E-28   |
| gene:Sme2.5_14974.1_g00001.1 | 182.93   | 89.24    | 129.49   | 55.26   | 57.36   | 42.38   | 1.3754 | 8.09E-06   |
| gene:Sme2.5_00626.1_g00002.1 | 172.01   | 108.02   | 130.43   | 43.34   | 43.29   | 71.32   | 1.3759 | 2.27E-06   |
| gene:Sme2.5_00225.1_g00019.1 | 98.29    | 51.66    | 76.56    | 14.08   | 40.05   | 33.08   | 1.3766 | 0.00069524 |
| gene:Sme2.5_01465.1_g00012.1 | 3043.34  | 1904.02  | 2462.19  | 542.80  | 1342.11 | 966.50  | 1.3777 | 6.69E-07   |
| gene:Sme2.5_11258.1_g00002.1 | 14303.88 | 12091.07 | 12674.86 | 5871.17 | 4157.29 | 4993.78 | 1.3790 | 8.32E-22   |
| gene:Sme2.5_01390.1_g00003.1 | 44.59    | 21.60    | 58.60    | 7.58    | 22.73   | 17.57   | 1.3811 | 0.00750268 |
| gene:Sme2.5_00048.1_g00005.1 | 404.08   | 394.52   | 419.66   | 138.68  | 161.27  | 167.46  | 1.3814 | 7.70E-21   |
| gene:Sme2.5_04142.1_g00005.1 | 58.25    | 25.36    | 41.59    | 18.42   | 10.82   | 18.61   | 1.3873 | 0.00233082 |
| gene:Sme2.5_00779.1_g00005.1 | 50.05    | 27.24    | 34.03    | 10.83   | 14.07   | 17.57   | 1.3887 | 0.00170508 |
| gene:Sme2.5_12747.1_g00001.1 | 45.50    | 38.51    | 47.26    | 11.92   | 22.73   | 15.51   | 1.3890 | 0.00036283 |
| gene:Sme2.5_31634.1_g00001.1 | 301.24   | 228.26   | 238.19   | 70.42   | 113.65  | 108.54  | 1.3911 | 7.17E-10   |
| gene:Sme2.5_08992.1_g00003.1 | 67.35    | 79.84    | 68.05    | 16.25   | 34.64   | 31.01   | 1.3926 | 2.88E-05   |
| gene:Sme2.5_06968.1_g00001.1 | 272.12   | 193.50   | 240.08   | 101.84  | 82.26   | 84.76   | 1.3929 | 2.03E-11   |
| gene:Sme2.5_02199.1_g00002.1 | 78.27    | 80.78    | 95.46    | 28.17   | 30.31   | 38.25   | 1.3934 | 7.54E-07   |
| gene:Sme2.5_01005.1_g00012.1 | 546.96   | 473.42   | 452.74   | 162.52  | 215.39  | 182.96  | 1.3935 | 8.14E-18   |
| gene:Sme2.5_01990.1_g00004.1 | 48.23    | 85.48    | 59.55    | 10.83   | 37.88   | 24.81   | 1.3937 | 0.00138868 |
| gene:Sme2.5_00563.1_g00013.1 | 1640.89  | 916.79   | 1429.11  | 338.03  | 662.40  | 516.85  | 1.3938 | 7.18E-08   |
| gene:Sme2.5_29705.1_g00001.1 | 170.19   | 89.24    | 132.33   | 45.50   | 49.79   | 53.75   | 1.3942 | 1.62E-06   |
| gene:Sme2.5_03223.1_g00001.1 | 20.02    | 29.12    | 23.63    | 8.67    | 7.58    | 11.37   | 1.3945 | 0.00532364 |
| gene:Sme2.5_00075.1_g00013.1 | 958.32   | 594.60   | 800.57   | 288.20  | 286.82  | 319.41  | 1.3957 | 6.44E-14   |
| gene:Sme2.5_07634.1_g00003.1 | 540.59   | 251.74   | 431.00   | 202.60  | 108.23  | 154.02  | 1.3962 | 2.45E-06   |
| gene:Sme2.5_04089.1_g00001.1 | 176.56   | 143.72   | 165.41   | 63.92   | 62.78   | 57.89   | 1.3966 | 3.50E-11   |
| gene:Sme2.5_00845.1_g00005.1 | 179.29   | 89.24    | 128.54   | 91.01   | 14.07   | 45.48   | 1.3995 | 0.00478127 |
| gene:Sme2.5_05438.1_g00002.1 | 62.80    | 31.00    | 71.83    | 20.59   | 16.24   | 25.84   | 1.4006 | 0.00082282 |
| gene:Sme2.5_16354.1_g00002.1 | 148.34   | 139.96   | 164.46   | 52.01   | 53.03   | 66.16   | 1.4014 | 1.85E-10   |

|                              |         |         |         |        |        |        |        |            |
|------------------------------|---------|---------|---------|--------|--------|--------|--------|------------|
| gene:Sme2.5_00038.1_g00017.1 | 48.23   | 47.91   | 35.92   | 7.58   | 21.65  | 20.67  | 1.4020 | 0.00116717 |
| gene:Sme2.5_10698.1_g00003.1 | 77.36   | 62.00   | 94.52   | 29.25  | 29.22  | 29.98  | 1.4024 | 3.83E-06   |
| gene:Sme2.5_00457.1_g00008.1 | 28.21   | 27.24   | 37.81   | 10.83  | 16.24  | 8.27   | 1.4027 | 0.00233916 |
| gene:Sme2.5_00043.1_g00027.1 | 22.75   | 33.82   | 31.19   | 16.25  | 9.74   | 7.24   | 1.4041 | 0.0038055  |
| gene:Sme2.5_05502.1_g00004.1 | 61.89   | 32.88   | 43.48   | 15.17  | 19.48  | 17.57  | 1.4054 | 0.00048935 |
| gene:Sme2.5_20506.1_g00003.1 | 26.39   | 28.18   | 30.25   | 10.83  | 11.91  | 9.30   | 1.4056 | 0.00189256 |
| gene:Sme2.5_15154.1_g00002.1 | 32.76   | 37.57   | 39.70   | 14.08  | 10.82  | 16.54  | 1.4058 | 0.00056207 |
| gene:Sme2.5_02028.1_g00014.1 | 47.32   | 59.18   | 86.01   | 18.42  | 31.39  | 22.74  | 1.4076 | 0.00014574 |
| gene:Sme2.5_02219.1_g00005.1 | 176.56  | 184.11  | 194.71  | 48.75  | 100.66 | 59.95  | 1.4081 | 1.05E-07   |
| gene:Sme2.5_02587.1_g00015.1 | 44.59   | 66.69   | 69.94   | 30.34  | 14.07  | 23.77  | 1.4092 | 0.00018527 |
| gene:Sme2.5_03377.1_g00006.1 | 146.52  | 118.36  | 137.05  | 47.67  | 53.03  | 50.65  | 1.4092 | 6.42E-10   |
| gene:Sme2.5_03226.1_g00001.1 | 107.39  | 92.99   | 91.68   | 29.25  | 48.71  | 32.04  | 1.4103 | 5.77E-07   |
| novel.2657                   | 43.68   | 25.36   | 30.25   | 5.42   | 21.65  | 10.34  | 1.4107 | 0.00786124 |
| novel.654                    | 181.11  | 91.12   | 143.67  | 49.84  | 47.62  | 58.92  | 1.4108 | 1.96E-06   |
| gene:Sme2.5_04177.1_g00001.1 | 41.86   | 30.06   | 35.92   | 16.25  | 12.99  | 11.37  | 1.4115 | 0.00071174 |
| gene:Sme2.5_12070.1_g00006.1 | 389.52  | 378.55  | 386.58  | 65.01  | 230.54 | 138.52 | 1.4115 | 2.64E-05   |
| gene:Sme2.5_03976.1_g00006.1 | 1377.88 | 1224.89 | 1256.14 | 292.53 | 684.04 | 473.43 | 1.4122 | 1.07E-08   |
| gene:Sme2.5_01699.1_g00010.1 | 38.22   | 32.88   | 28.36   | 10.83  | 17.32  | 9.30   | 1.4124 | 0.00146477 |
| gene:Sme2.5_00876.1_g00016.1 | 2022.22 | 1143.17 | 1597.35 | 778.99 | 440.52 | 569.57 | 1.4127 | 3.90E-09   |
| gene:Sme2.5_01411.1_g00009.1 | 99.20   | 62.94   | 56.71   | 13.00  | 45.46  | 23.77  | 1.4134 | 0.00121668 |
| gene:Sme2.5_00018.1_g00017.1 | 392.25  | 728.92  | 565.22  | 190.69 | 253.27 | 189.17 | 1.4135 | 1.63E-09   |
| gene:Sme2.5_00861.1_g00002.1 | 21.84   | 23.48   | 22.68   | 8.67   | 5.41   | 11.37  | 1.4139 | 0.00630048 |
| gene:Sme2.5_06668.1_g00002.1 | 1085.74 | 676.32  | 818.53  | 395.46 | 257.60 | 315.28 | 1.4143 | 2.94E-11   |
| gene:Sme2.5_00033.1_g00006.1 | 148.34  | 133.38  | 157.85  | 42.25  | 55.20  | 67.19  | 1.4147 | 2.63E-09   |
| gene:Sme2.5_00029.1_g00036.1 | 54.61   | 38.51   | 66.16   | 13.00  | 28.14  | 18.61  | 1.4150 | 0.00042344 |
| novel.1524                   | 24.57   | 57.30   | 34.97   | 14.08  | 17.32  | 12.40  | 1.4157 | 0.00221127 |
| novel.1221                   | 858.21  | 579.57  | 741.97  | 320.70 | 222.96 | 271.86 | 1.4185 | 1.71E-13   |
| gene:Sme2.5_00208.1_g00007.1 | 365.86  | 246.10  | 300.57  | 110.51 | 116.89 | 113.71 | 1.4200 | 6.59E-13   |
| gene:Sme2.5_06721.1_g00002.1 | 25.48   | 40.39   | 28.36   | 15.17  | 8.66   | 11.37  | 1.4205 | 0.00217073 |
| gene:Sme2.5_00348.1_g00016.1 | 20.93   | 31.00   | 36.86   | 11.92  | 12.99  | 8.27   | 1.4218 | 0.00290958 |

|                              |         |         |         |        |        |        |        |            |
|------------------------------|---------|---------|---------|--------|--------|--------|--------|------------|
| gene:Sme2.5_00670.1_g00005.1 | 380.42  | 309.98  | 352.55  | 147.35 | 114.73 | 127.14 | 1.4224 | 1.49E-16   |
| gene:Sme2.5_00444.1_g00014.1 | 226.61  | 260.19  | 285.44  | 81.26  | 112.56 | 94.07  | 1.4234 | 3.77E-13   |
| gene:Sme2.5_04696.1_g00006.1 | 164.73  | 111.78  | 157.85  | 58.51  | 44.38  | 58.92  | 1.4242 | 2.10E-08   |
| gene:Sme2.5_08601.1_g00002.1 | 134.69  | 120.23  | 144.61  | 27.09  | 60.61  | 60.99  | 1.4245 | 1.95E-06   |
| novel.828                    | 37.31   | 107.08  | 70.89   | 33.59  | 23.81  | 22.74  | 1.4258 | 0.00071555 |
| novel.214                    | 1201.32 | 1766.88 | 1514.18 | 604.56 | 503.29 | 557.16 | 1.4286 | 1.63E-18   |
| novel.1593                   | 83.73   | 53.54   | 84.12   | 23.84  | 34.64  | 23.77  | 1.4301 | 1.92E-05   |
| gene:Sme2.5_12236.1_g00001.1 | 70.99   | 70.45   | 82.23   | 8.67   | 38.96  | 35.15  | 1.4323 | 0.00089691 |
| gene:Sme2.5_02465.1_g00001.1 | 1317.81 | 1055.81 | 1239.13 | 328.28 | 587.71 | 422.78 | 1.4323 | 1.56E-12   |
| gene:Sme2.5_00433.1_g00002.1 | 153.81  | 133.38  | 139.89  | 43.34  | 76.85  | 38.25  | 1.4327 | 3.37E-07   |
| gene:Sme2.5_00010.1_g00034.1 | 23.66   | 15.03   | 18.90   | 8.67   | 6.49   | 6.20   | 1.4333 | 0.01087807 |
| gene:Sme2.5_01301.1_g00008.1 | 42.77   | 42.27   | 47.26   | 10.83  | 19.48  | 18.61  | 1.4334 | 0.00018686 |
| gene:Sme2.5_01834.1_g00009.1 | 20.93   | 17.85   | 18.90   | 8.67   | 7.58   | 5.17   | 1.4335 | 0.00953267 |
| novel.824                    | 115.58  | 81.72   | 76.56   | 34.67  | 38.96  | 27.91  | 1.4338 | 1.82E-06   |
| gene:Sme2.5_03274.1_g00011.1 | 22.75   | 22.54   | 29.30   | 3.25   | 10.82  | 13.44  | 1.4339 | 0.00897574 |
| gene:Sme2.5_00810.1_g00003.1 | 88.28   | 119.30  | 95.46   | 42.25  | 38.96  | 31.01  | 1.4344 | 1.49E-07   |
| gene:Sme2.5_06254.1_g00005.1 | 1751.92 | 1401.48 | 1558.60 | 691.24 | 483.81 | 567.50 | 1.4353 | 1.05E-19   |
| gene:Sme2.5_04927.1_g00001.1 | 279.40  | 240.47  | 219.28  | 61.76  | 128.80 | 82.70  | 1.4363 | 3.31E-08   |
| gene:Sme2.5_01156.1_g00003.1 | 1033.86 | 1031.39 | 933.84  | 303.36 | 468.66 | 335.95 | 1.4369 | 5.42E-17   |
| gene:Sme2.5_01789.1_g00003.1 | 48.23   | 53.54   | 48.20   | 19.50  | 15.15  | 20.67  | 1.4371 | 4.09E-05   |
| gene:Sme2.5_01343.1_g00002.1 | 140.15  | 134.32  | 127.60  | 37.92  | 63.86  | 46.52  | 1.4397 | 6.36E-09   |
| gene:Sme2.5_01236.1_g00008.1 | 39.13   | 30.06   | 43.48   | 13.00  | 12.99  | 15.51  | 1.4397 | 0.00044601 |
| gene:Sme2.5_00754.1_g00004.1 | 256.65  | 178.47  | 188.09  | 70.42  | 98.49  | 60.99  | 1.4404 | 6.35E-09   |
| gene:Sme2.5_03976.1_g00005.1 | 195.67  | 162.50  | 179.58  | 47.67  | 81.18  | 69.26  | 1.4405 | 7.18E-10   |
| gene:Sme2.5_24535.1_g00002.1 | 203.86  | 182.23  | 215.50  | 53.09  | 81.18  | 86.83  | 1.4427 | 1.22E-10   |
| gene:Sme2.5_00009.1_g00017.1 | 124.68  | 112.72  | 143.67  | 43.34  | 63.86  | 33.08  | 1.4440 | 2.27E-07   |
| gene:Sme2.5_02231.1_g00005.1 | 204.77  | 125.87  | 157.85  | 68.26  | 61.69  | 49.62  | 1.4456 | 2.34E-08   |
| gene:Sme2.5_25094.1_g00001.1 | 29.12   | 20.67   | 40.64   | 14.08  | 11.91  | 7.24   | 1.4477 | 0.00354818 |
| gene:Sme2.5_13865.1_g00001.1 | 85.55   | 71.39   | 67.11   | 22.75  | 33.55  | 25.84  | 1.4486 | 2.11E-06   |
| gene:Sme2.5_01284.1_g00006.1 | 211.14  | 170.02  | 189.98  | 40.09  | 108.23 | 60.99  | 1.4488 | 3.72E-06   |

|                              |         |         |         |         |         |         |        |            |
|------------------------------|---------|---------|---------|---------|---------|---------|--------|------------|
| gene:Sme2.5_05609.1_g00005.1 | 2803.08 | 1847.66 | 2534.97 | 423.63  | 1322.63 | 884.84  | 1.4495 | 0.00274601 |
| gene:Sme2.5_13457.1_g00003.1 | 19.11   | 25.36   | 25.52   | 3.25    | 15.15   | 7.24    | 1.4496 | 0.01276513 |
| gene:Sme2.5_02549.1_g00008.1 | 219.33  | 120.23  | 190.93  | 71.51   | 56.28   | 66.16   | 1.4519 | 7.62E-08   |
| gene:Sme2.5_00984.1_g00004.1 | 40.04   | 33.82   | 42.53   | 6.50    | 16.24   | 19.64   | 1.4538 | 0.00112224 |
| gene:Sme2.5_08372.1_g00001.1 | 44.59   | 43.21   | 61.44   | 10.83   | 28.14   | 15.51   | 1.4546 | 0.00049229 |
| gene:Sme2.5_10189.1_g00003.1 | 404.08  | 174.72  | 331.76  | 80.17   | 127.72  | 124.04  | 1.4557 | 2.09E-06   |
| gene:Sme2.5_02724.1_g00006.1 | 23.66   | 35.69   | 28.36   | 15.17   | 4.33    | 12.40   | 1.4570 | 0.00470031 |
| gene:Sme2.5_00345.1_g00009.1 | 251.18  | 303.40  | 257.09  | 100.76  | 102.82  | 92.00   | 1.4578 | 2.40E-16   |
| gene:Sme2.5_14566.1_g00001.1 | 1971.25 | 1670.13 | 1754.25 | 401.96  | 927.57  | 634.69  | 1.4579 | 2.58E-09   |
| gene:Sme2.5_30201.1_g00001.1 | 20.93   | 15.97   | 21.74   | 9.75    | 5.41    | 6.20    | 1.4585 | 0.00940067 |
| gene:Sme2.5_20706.1_g00001.1 | 936.48  | 998.51  | 1055.77 | 400.87  | 359.34  | 327.68  | 1.4594 | 8.67E-31   |
| gene:Sme2.5_00276.1_g00022.1 | 391.34  | 268.65  | 366.73  | 144.10  | 112.56  | 116.81  | 1.4596 | 6.47E-13   |
| gene:Sme2.5_10920.1_g00003.1 | 43.68   | 32.88   | 32.14   | 16.25   | 14.07   | 9.30    | 1.4600 | 0.00064381 |
| gene:Sme2.5_07900.1_g00002.1 | 2935.04 | 3727.26 | 3372.40 | 980.51  | 1440.60 | 1221.83 | 1.4618 | 9.25E-20   |
| novel.2292                   | 30.94   | 18.79   | 23.63   | 8.67    | 8.66    | 9.30    | 1.4625 | 0.00392034 |
| gene:Sme2.5_03644.1_g00007.1 | 205.68  | 182.23  | 205.10  | 76.92   | 59.53   | 78.56   | 1.4628 | 3.44E-13   |
| gene:Sme2.5_09086.1_g00003.1 | 128.32  | 130.57  | 122.87  | 36.84   | 51.95   | 49.62   | 1.4630 | 6.30E-10   |
| gene:Sme2.5_02420.1_g00003.1 | 25.48   | 17.85   | 30.25   | 7.58    | 11.91   | 7.24    | 1.4630 | 0.00486785 |
| gene:Sme2.5_09255.1_g00004.1 | 116.49  | 74.21   | 120.98  | 8.67    | 67.11   | 37.21   | 1.4640 | 0.0041426  |
| gene:Sme2.5_01099.1_g00004.1 | 53.70   | 34.76   | 50.09   | 8.67    | 28.14   | 13.44   | 1.4651 | 0.00144528 |
| gene:Sme2.5_06498.1_g00005.1 | 67.35   | 53.54   | 87.90   | 20.59   | 25.98   | 28.94   | 1.4657 | 1.35E-05   |
| gene:Sme2.5_00499.1_g00009.1 | 393.16  | 340.98  | 383.74  | 135.43  | 120.14  | 148.85  | 1.4661 | 7.24E-20   |
| gene:Sme2.5_10214.1_g00003.1 | 22.75   | 51.66   | 43.48   | 14.08   | 9.74    | 18.61   | 1.4703 | 0.00186945 |
| novel.2631                   | 108.30  | 79.84   | 106.81  | 33.59   | 31.39   | 41.35   | 1.4706 | 1.22E-07   |
| gene:Sme2.5_04906.1_g00007.1 | 37.31   | 31.00   | 34.97   | 6.50    | 16.24   | 14.47   | 1.4713 | 0.00106866 |
| gene:Sme2.5_08694.1_g00002.1 | 101.02  | 37.57   | 59.55   | 24.92   | 23.81   | 22.74   | 1.4725 | 0.00037105 |
| gene:Sme2.5_01315.1_g00006.1 | 210.23  | 152.17  | 170.13  | 78.01   | 49.79   | 64.09   | 1.4731 | 9.81E-10   |
| gene:Sme2.5_00646.1_g00020.1 | 7467.29 | 7504.31 | 7714.56 | 1632.75 | 3857.48 | 2675.20 | 1.4742 | 1.18E-09   |
| novel.581                    | 1795.61 | 1647.59 | 1681.48 | 340.20  | 938.39  | 564.40  | 1.4755 | 1.17E-07   |
| gene:Sme2.5_00845.1_g00007.1 | 75.54   | 78.90   | 70.89   | 24.92   | 25.98   | 29.98   | 1.4770 | 3.48E-07   |

|                              |         |         |         |        |        |        |        |            |
|------------------------------|---------|---------|---------|--------|--------|--------|--------|------------|
| gene:Sme2.5_02857.1_g00008.1 | 1607.22 | 1298.16 | 1545.37 | 319.62 | 729.50 | 548.89 | 1.4777 | 1.90E-09   |
| gene:Sme2.5_00978.1_g00004.1 | 497.82  | 601.17  | 567.11  | 111.59 | 284.66 | 201.57 | 1.4786 | 5.84E-08   |
| gene:Sme2.5_05459.1_g00005.1 | 111.03  | 103.33  | 112.48  | 41.17  | 37.88  | 38.25  | 1.4787 | 1.21E-09   |
| gene:Sme2.5_05312.1_g00002.1 | 49.14   | 32.88   | 46.31   | 15.17  | 22.73  | 8.27   | 1.4797 | 0.00077065 |
| gene:Sme2.5_03706.1_g00008.1 | 29.12   | 30.06   | 33.08   | 11.92  | 10.82  | 10.34  | 1.4804 | 0.00074511 |
| gene:Sme2.5_01004.1_g00011.1 | 1452.50 | 1426.84 | 1405.48 | 429.04 | 605.03 | 501.34 | 1.4807 | 7.39E-26   |
| gene:Sme2.5_19358.1_g00001.1 | 364.04  | 292.13  | 308.13  | 121.35 | 104.99 | 118.87 | 1.4821 | 1.37E-17   |
| gene:Sme2.5_00776.1_g00011.1 | 118.31  | 80.78   | 99.24   | 33.59  | 45.46  | 27.91  | 1.4824 | 5.26E-07   |
| gene:Sme2.5_12250.1_g00001.1 | 55.52   | 42.27   | 51.04   | 11.92  | 22.73  | 18.61  | 1.4825 | 8.38E-05   |
| gene:Sme2.5_00855.1_g00011.1 | 323.08  | 141.84  | 266.54  | 94.26  | 69.27  | 98.20  | 1.4825 | 9.34E-07   |
| gene:Sme2.5_01323.1_g00008.1 | 1313.26 | 428.33  | 924.39  | 399.79 | 255.43 | 298.74 | 1.4827 | 0.0023005  |
| gene:Sme2.5_04400.1_g00002.1 | 120.13  | 123.05  | 99.24   | 27.09  | 50.87  | 44.45  | 1.4835 | 1.26E-07   |
| gene:Sme2.5_01707.1_g00008.1 | 380.42  | 295.89  | 344.05  | 123.51 | 124.47 | 116.81 | 1.4845 | 3.17E-18   |
| gene:Sme2.5_03438.1_g00008.1 | 201.13  | 143.72  | 156.90  | 61.76  | 66.02  | 51.68  | 1.4850 | 2.04E-10   |
| gene:Sme2.5_02798.1_g00004.1 | 1343.29 | 1591.23 | 1416.82 | 392.21 | 644.00 | 517.88 | 1.4854 | 9.54E-17   |
| gene:Sme2.5_04735.1_g00006.1 | 16.38   | 27.24   | 18.90   | 5.42   | 6.49   | 10.34  | 1.4855 | 0.00852452 |
| gene:Sme2.5_01230.1_g00007.1 | 1098.48 | 982.54  | 1000.95 | 451.79 | 312.80 | 334.92 | 1.4874 | 7.56E-21   |
| gene:Sme2.5_05103.1_g00001.1 | 960.14  | 769.31  | 869.57  | 229.69 | 398.30 | 298.74 | 1.4879 | 5.58E-14   |
| gene:Sme2.5_01644.1_g00002.1 | 140.15  | 112.72  | 118.15  | 27.09  | 61.69  | 43.42  | 1.4892 | 6.28E-07   |
| gene:Sme2.5_00536.1_g00002.1 | 35.49   | 31.94   | 13.23   | 6.50   | 10.82  | 11.37  | 1.4905 | 0.00764142 |
| gene:Sme2.5_00736.1_g00017.1 | 129.23  | 75.15   | 98.30   | 47.67  | 16.24  | 43.42  | 1.4951 | 9.57E-05   |
| novel.1436                   | 279.40  | 195.38  | 187.15  | 55.26  | 115.81 | 63.06  | 1.5005 | 4.36E-07   |
| gene:Sme2.5_05877.1_g00005.1 | 342.19  | 245.17  | 301.51  | 93.18  | 136.38 | 84.76  | 1.5010 | 3.69E-11   |
| gene:Sme2.5_00030.1_g00022.1 | 1509.84 | 708.26  | 1179.58 | 604.56 | 181.83 | 412.44 | 1.5029 | 0.00745993 |
| novel.2741                   | 181.11  | 167.20  | 199.43  | 65.01  | 62.78  | 65.12  | 1.5054 | 6.63E-14   |
| gene:Sme2.5_05028.1_g00005.1 | 181.11  | 170.02  | 197.54  | 47.67  | 81.18  | 64.09  | 1.5077 | 6.20E-11   |
| gene:Sme2.5_00372.1_g00004.1 | 101.93  | 84.54   | 87.90   | 37.92  | 38.96  | 19.64  | 1.5111 | 1.00E-06   |
| gene:Sme2.5_07809.1_g00002.1 | 72.81   | 94.87   | 84.12   | 26.00  | 24.89  | 37.21  | 1.5117 | 4.19E-07   |
| gene:Sme2.5_00171.1_g00001.1 | 618.86  | 441.49  | 524.57  | 165.77 | 232.70 | 157.12 | 1.5131 | 4.19E-14   |
| gene:Sme2.5_18092.1_g00001.1 | 545.14  | 461.21  | 541.59  | 183.10 | 168.85 | 189.17 | 1.5161 | 3.25E-25   |

|                              |         |         |         |        |        |        |        |            |
|------------------------------|---------|---------|---------|--------|--------|--------|--------|------------|
| gene:Sme2.5_00228.1_g00015.1 | 69.17   | 33.82   | 43.48   | 14.08  | 22.73  | 14.47  | 1.5164 | 0.00039669 |
| gene:Sme2.5_00216.1_g00001.1 | 339.46  | 211.35  | 255.20  | 101.84 | 96.33  | 83.73  | 1.5167 | 1.56E-11   |
| gene:Sme2.5_00076.1_g00022.1 | 491.45  | 497.85  | 505.67  | 167.93 | 168.85 | 185.03 | 1.5179 | 8.87E-30   |
| gene:Sme2.5_00018.1_g00029.1 | 145.61  | 59.18   | 94.52   | 42.25  | 29.22  | 33.08  | 1.5185 | 3.75E-05   |
| gene:Sme2.5_00407.1_g00013.1 | 267.57  | 77.96   | 176.75  | 53.09  | 70.35  | 58.92  | 1.5185 | 7.85E-05   |
| gene:Sme2.5_00225.1_g00005.1 | 172.92  | 147.47  | 177.69  | 58.51  | 57.36  | 57.89  | 1.5194 | 5.47E-13   |
| gene:Sme2.5_08782.1_g00004.1 | 678.02  | 704.50  | 720.23  | 170.10 | 317.13 | 246.02 | 1.5198 | 8.58E-14   |
| gene:Sme2.5_02368.1_g00006.1 | 1836.56 | 1060.50 | 1449.91 | 563.39 | 454.59 | 496.17 | 1.5216 | 1.33E-14   |
| gene:Sme2.5_00612.1_g00004.1 | 29.12   | 38.51   | 39.70   | 5.42   | 20.56  | 11.37  | 1.5229 | 0.00195132 |
| gene:Sme2.5_02557.1_g00012.1 | 632.51  | 397.34  | 496.22  | 210.19 | 168.85 | 151.95 | 1.5239 | 3.90E-13   |
| gene:Sme2.5_13349.1_g00001.1 | 35.49   | 41.33   | 49.15   | 8.67   | 22.73  | 12.40  | 1.5249 | 0.00049296 |
| gene:Sme2.5_05971.1_g00001.1 | 202.04  | 151.23  | 140.83  | 76.92  | 41.13  | 53.75  | 1.5250 | 2.90E-08   |
| gene:Sme2.5_01955.1_g00002.1 | 60.98   | 59.18   | 57.66   | 16.25  | 22.73  | 22.74  | 1.5253 | 3.65E-06   |
| gene:Sme2.5_01270.1_g00006.1 | 207.50  | 139.02  | 186.20  | 79.09  | 63.86  | 42.38  | 1.5256 | 1.97E-08   |
| novel.227                    | 148.34  | 262.07  | 233.46  | 47.67  | 87.67  | 87.86  | 1.5272 | 2.22E-07   |
| gene:Sme2.5_00740.1_g00010.1 | 1020.21 | 824.73  | 936.67  | 208.02 | 442.68 | 314.24 | 1.5275 | 7.88E-11   |
| gene:Sme2.5_03299.1_g00002.1 | 273.94  | 233.89  | 256.14  | 62.84  | 119.06 | 82.70  | 1.5302 | 6.34E-11   |
| gene:Sme2.5_01725.1_g00002.1 | 113.76  | 95.81   | 103.02  | 24.92  | 51.95  | 31.01  | 1.5362 | 4.14E-07   |
| gene:Sme2.5_06541.1_g00003.1 | 458.69  | 315.62  | 450.85  | 125.68 | 161.27 | 135.41 | 1.5367 | 1.55E-14   |
| gene:Sme2.5_00906.1_g00013.1 | 26.39   | 31.00   | 29.30   | 7.58   | 12.99  | 9.30   | 1.5373 | 0.0010016  |
| gene:Sme2.5_02420.1_g00004.1 | 242.99  | 209.47  | 281.66  | 63.92  | 107.15 | 81.66  | 1.5385 | 1.93E-11   |
| gene:Sme2.5_04071.1_g00001.1 | 31.85   | 39.45   | 34.03   | 4.33   | 19.48  | 12.40  | 1.5394 | 0.00203266 |
| gene:Sme2.5_06484.1_g00003.1 | 121.04  | 108.96  | 158.79  | 15.17  | 83.34  | 35.15  | 1.5411 | 0.00078941 |
| gene:Sme2.5_00347.1_g00007.1 | 992.91  | 686.65  | 881.85  | 228.61 | 347.43 | 303.91 | 1.5414 | 2.65E-15   |
| gene:Sme2.5_02055.1_g00010.1 | 92.83   | 58.24   | 78.45   | 32.50  | 19.48  | 26.88  | 1.5416 | 3.94E-06   |
| gene:Sme2.5_07207.1_g00002.1 | 15.47   | 15.03   | 16.07   | 5.42   | 5.41   | 5.17   | 1.5419 | 0.01216531 |
| novel.1273                   | 139.24  | 57.30   | 120.04  | 44.42  | 28.14  | 36.18  | 1.5422 | 3.04E-05   |
| gene:Sme2.5_00951.1_g00012.1 | 45.50   | 47.91   | 43.48   | 19.50  | 11.91  | 15.51  | 1.5451 | 4.19E-05   |
| gene:Sme2.5_03219.1_g00006.1 | 239.35  | 241.41  | 206.99  | 45.50  | 113.65 | 76.49  | 1.5454 | 5.31E-08   |
| gene:Sme2.5_21838.1_g00003.1 | 52.79   | 53.54   | 58.60   | 11.92  | 24.89  | 19.64  | 1.5460 | 2.04E-05   |



|                              |         |         |         |         |         |         |        |            |
|------------------------------|---------|---------|---------|---------|---------|---------|--------|------------|
| gene:Sme2.5_01040.1_g00005.1 | 187.48  | 161.56  | 198.49  | 57.42   | 81.18   | 48.58   | 1.5503 | 6.58E-11   |
| gene:Sme2.5_02452.1_g00002.1 | 20.93   | 15.03   | 17.01   | 3.25    | 7.58    | 7.24    | 1.5505 | 0.01046078 |
| gene:Sme2.5_02377.1_g00010.1 | 250.27  | 91.12   | 185.26  | 42.25   | 64.94   | 72.36   | 1.5520 | 1.82E-05   |
| gene:Sme2.5_03454.1_g00006.1 | 31.85   | 25.36   | 42.53   | 7.58    | 10.82   | 15.51   | 1.5521 | 0.00101182 |
| novel.3223                   | 35.49   | 26.30   | 22.68   | 10.83   | 9.74    | 8.27    | 1.5531 | 0.00130154 |
| novel.2635                   | 56.43   | 62.94   | 50.09   | 17.34   | 28.14   | 12.40   | 1.5534 | 3.66E-05   |
| gene:Sme2.5_02777.1_g00001.1 | 28.21   | 15.03   | 13.23   | 8.67    | 6.49    | 4.13    | 1.5551 | 0.01304486 |
| gene:Sme2.5_03533.1_g00001.1 | 191.12  | 154.99  | 164.46  | 48.75   | 63.86   | 60.99   | 1.5561 | 1.39E-12   |
| gene:Sme2.5_01082.1_g00002.1 | 54.61   | 52.60   | 52.93   | 18.42   | 21.65   | 14.47   | 1.5566 | 7.67E-06   |
| gene:Sme2.5_06783.1_g00001.1 | 19.11   | 41.33   | 27.41   | 9.75    | 8.66    | 11.37   | 1.5581 | 0.00216072 |
| gene:Sme2.5_00041.1_g00011.1 | 1263.20 | 1959.44 | 1551.99 | 444.21  | 636.42  | 540.62  | 1.5582 | 3.38E-16   |
| gene:Sme2.5_03271.1_g00010.1 | 223.88  | 206.65  | 200.38  | 53.09   | 86.59   | 74.43   | 1.5589 | 5.28E-13   |
| gene:Sme2.5_03250.1_g00002.1 | 1766.48 | 1371.42 | 1538.75 | 440.96  | 605.03  | 539.59  | 1.5605 | 1.16E-23   |
| gene:Sme2.5_04205.1_g00003.1 | 86.46   | 117.42  | 79.40   | 21.67   | 37.88   | 36.18   | 1.5637 | 6.43E-07   |
| gene:Sme2.5_06179.1_g00001.1 | 12.74   | 22.54   | 21.74   | 8.67    | 7.58    | 3.10    | 1.5642 | 0.01100195 |
| gene:Sme2.5_00396.1_g00021.1 | 43.68   | 40.39   | 35.92   | 9.75    | 20.56   | 10.34   | 1.5644 | 0.00026195 |
| gene:Sme2.5_00254.1_g00006.1 | 318.53  | 236.71  | 271.27  | 86.68   | 103.91  | 88.90   | 1.5650 | 8.36E-16   |
| gene:Sme2.5_01341.1_g00014.1 | 985.63  | 850.09  | 951.80  | 264.36  | 334.45  | 342.15  | 1.5664 | 5.57E-28   |
| gene:Sme2.5_03245.1_g00008.1 | 308.52  | 723.28  | 860.11  | 224.27  | 264.09  | 149.89  | 1.5678 | 0.00121293 |
| novel.2503                   | 183.84  | 214.17  | 155.95  | 48.75   | 71.43   | 66.16   | 1.5713 | 1.71E-11   |
| gene:Sme2.5_00019.1_g00004.1 | 300.33  | 261.13  | 278.83  | 117.01  | 77.93   | 87.86   | 1.5718 | 1.05E-15   |
| gene:Sme2.5_20915.1_g00001.1 | 6082.13 | 6472.93 | 6448.96 | 1560.15 | 2657.16 | 2170.76 | 1.5728 | 5.41E-19   |
| gene:Sme2.5_02032.1_g00006.1 | 163.82  | 107.08  | 154.06  | 28.17   | 60.61   | 53.75   | 1.5754 | 3.50E-07   |
| gene:Sme2.5_00423.1_g00011.1 | 1377.88 | 1313.18 | 1405.48 | 393.29  | 522.77  | 457.93  | 1.5760 | 2.14E-33   |
| gene:Sme2.5_01260.1_g00005.1 | 63.71   | 42.27   | 46.31   | 19.50   | 10.82   | 20.67   | 1.5769 | 6.45E-05   |
| gene:Sme2.5_00615.1_g00010.1 | 54.61   | 42.27   | 55.77   | 8.67    | 21.65   | 20.67   | 1.5798 | 8.95E-05   |
| gene:Sme2.5_07287.1_g00003.1 | 154.72  | 84.54   | 118.15  | 61.76   | 20.56   | 37.21   | 1.5809 | 3.45E-05   |
| gene:Sme2.5_00867.1_g00009.1 | 255.74  | 274.28  | 238.19  | 83.42   | 80.09   | 93.03   | 1.5814 | 9.32E-19   |
| gene:Sme2.5_02014.1_g00008.1 | 436.84  | 450.88  | 448.96  | 105.09  | 193.74  | 147.82  | 1.5814 | 2.22E-14   |
| gene:Sme2.5_20506.1_g00002.1 | 30.94   | 33.82   | 31.19   | 8.67    | 15.15   | 8.27    | 1.5827 | 0.00051105 |

|                              |         |          |          |         |         |         |        |            |
|------------------------------|---------|----------|----------|---------|---------|---------|--------|------------|
| gene:Sme2.5_00187.1_g00002.1 | 8338.24 | 7746.66  | 8541.59  | 1828.85 | 3623.70 | 2768.23 | 1.5829 | 3.08E-14   |
| gene:Sme2.5_04162.1_g00002.1 | 1129.42 | 844.46   | 1028.36  | 280.61  | 386.40  | 334.92  | 1.5833 | 2.25E-21   |
| gene:Sme2.5_18104.1_g00001.1 | 351.29  | 230.14   | 270.32   | 117.01  | 61.69   | 105.44  | 1.5836 | 1.32E-09   |
| novel.2267                   | 170.19  | 171.90   | 146.50   | 47.67   | 50.87   | 64.09   | 1.5853 | 1.06E-12   |
| novel.1489                   | 111.03  | 95.81    | 87.90    | 40.09   | 27.06   | 31.01   | 1.5874 | 1.23E-08   |
| gene:Sme2.5_02754.1_g00004.1 | 17.29   | 31.00    | 25.52    | 3.25    | 12.99   | 8.27    | 1.5894 | 0.00596253 |
| gene:Sme2.5_09833.1_g00003.1 | 325.81  | 221.68   | 338.37   | 88.84   | 128.80  | 76.49   | 1.5918 | 1.65E-10   |
| gene:Sme2.5_00772.1_g00009.1 | 45.50   | 23.48    | 36.86    | 17.34   | 4.33    | 13.44   | 1.5918 | 0.0024617  |
| gene:Sme2.5_16719.1_g00002.1 | 708.96  | 811.58   | 808.13   | 239.44  | 277.08  | 255.32  | 1.5930 | 7.92E-34   |
| gene:Sme2.5_00625.1_g00004.1 | 9930.90 | 10054.60 | 10107.75 | 2890.62 | 3822.85 | 3253.04 | 1.5943 | 5.81E-40   |
| gene:Sme2.5_00748.1_g00002.1 | 67.35   | 55.42    | 47.26    | 17.34   | 12.99   | 25.84   | 1.5947 | 2.12E-05   |
| gene:Sme2.5_00881.1_g00011.1 | 170.19  | 163.44   | 193.76   | 44.42   | 62.78   | 67.19   | 1.5949 | 1.63E-12   |
| gene:Sme2.5_00555.1_g00001.1 | 7321.67 | 5541.11  | 6452.74  | 2890.62 | 1429.78 | 2071.52 | 1.5955 | 8.15E-13   |
| gene:Sme2.5_00747.1_g00010.1 | 1500.74 | 972.21   | 1278.83  | 345.62  | 431.86  | 463.10  | 1.5964 | 8.66E-18   |
| gene:Sme2.5_03438.1_g00001.1 | 141.97  | 137.14   | 137.05   | 42.25   | 46.54   | 48.58   | 1.5984 | 7.46E-13   |
| gene:Sme2.5_04303.1_g00004.1 | 61.89   | 38.51    | 38.75    | 13.00   | 19.48   | 13.44   | 1.6018 | 9.98E-05   |
| gene:Sme2.5_00299.1_g00007.1 | 264.84  | 180.35   | 212.67   | 74.76   | 79.01   | 63.06   | 1.6027 | 6.94E-13   |
| gene:Sme2.5_01532.1_g00006.1 | 21.84   | 9.39     | 23.63    | 5.42    | 4.33    | 8.27    | 1.6030 | 0.01325255 |
| gene:Sme2.5_15399.1_g00002.1 | 811.80  | 515.69   | 698.49   | 250.27  | 203.48  | 212.94  | 1.6038 | 7.65E-17   |
| gene:Sme2.5_01475.1_g00007.1 | 789.96  | 949.66   | 829.87   | 208.02  | 379.90  | 257.39  | 1.6041 | 1.53E-14   |
| gene:Sme2.5_07515.1_g00002.1 | 25.48   | 15.03    | 34.03    | 11.92   | 3.25    | 9.30    | 1.6057 | 0.0069214  |
| novel.1401                   | 154.72  | 132.45   | 156.90   | 37.92   | 51.95   | 55.82   | 1.6064 | 1.18E-11   |
| gene:Sme2.5_01391.1_g00012.1 | 63.71   | 51.66    | 50.09    | 14.08   | 19.48   | 20.67   | 1.6080 | 5.74E-06   |
| novel.1601                   | 18.20   | 25.36    | 15.12    | 10.83   | 4.33    | 4.13    | 1.6086 | 0.00904012 |
| gene:Sme2.5_00026.1_g00009.1 | 40.95   | 13.15    | 27.41    | 16.25   | 4.33    | 6.20    | 1.6093 | 0.01195777 |
| gene:Sme2.5_03284.1_g00006.1 | 771.76  | 619.02   | 742.91   | 171.18  | 312.80  | 215.01  | 1.6103 | 4.36E-14   |
| gene:Sme2.5_00694.1_g00012.1 | 1836.56 | 1126.26  | 1463.14  | 642.48  | 311.72  | 493.07  | 1.6127 | 1.55E-10   |
| novel.1668                   | 58.25   | 37.57    | 51.04    | 21.67   | 11.91   | 14.47   | 1.6136 | 5.26E-05   |
| gene:Sme2.5_09568.1_g00004.1 | 34.58   | 20.67    | 26.47    | 8.67    | 9.74    | 8.27    | 1.6168 | 0.00117428 |
| gene:Sme2.5_01687.1_g00002.1 | 1003.83 | 1102.77  | 967.86   | 261.11  | 430.77  | 310.11  | 1.6176 | 8.33E-19   |

|                              |          |         |         |         |         |         |        |            |
|------------------------------|----------|---------|---------|---------|---------|---------|--------|------------|
| gene:Sme2.5_00468.1_g00005.1 | 47.32    | 46.03   | 31.19   | 11.92   | 12.99   | 15.51   | 1.6227 | 8.37E-05   |
| gene:Sme2.5_03682.1_g00009.1 | 343.10   | 284.62  | 338.37  | 74.76   | 133.13  | 105.44  | 1.6245 | 8.94E-14   |
| novel.1353                   | 138.33   | 17.85   | 68.05   | 33.59   | 20.56   | 18.61   | 1.6254 | 0.00605445 |
| gene:Sme2.5_06075.1_g00010.1 | 32.76    | 38.51   | 34.03   | 8.67    | 10.82   | 14.47   | 1.6288 | 0.00017184 |
| gene:Sme2.5_00015.1_g00032.1 | 34.58    | 19.73   | 15.12   | 6.50    | 11.91   | 4.13    | 1.6290 | 0.00743835 |
| novel.2654                   | 46.41    | 51.66   | 20.79   | 13.00   | 15.15   | 10.34   | 1.6293 | 0.00075931 |
| gene:Sme2.5_03311.1_g00003.1 | 14.56    | 30.06   | 24.57   | 5.42    | 7.58    | 9.30    | 1.6296 | 0.00390369 |
| gene:Sme2.5_11398.1_g00003.1 | 2972.35  | 2060.89 | 2447.07 | 1017.35 | 535.76  | 863.14  | 1.6303 | 3.04E-13   |
| gene:Sme2.5_15591.1_g00001.1 | 214.78   | 60.12   | 152.17  | 39.00   | 64.94   | 34.11   | 1.6305 | 0.00015041 |
| gene:Sme2.5_02511.1_g00003.1 | 110.12   | 106.14  | 126.65  | 33.59   | 32.47   | 44.45   | 1.6313 | 2.73E-10   |
| gene:Sme2.5_01186.1_g00003.1 | 56.43    | 17.85   | 34.97   | 8.67    | 18.40   | 8.27    | 1.6317 | 0.00346192 |
| gene:Sme2.5_15851.1_g00001.1 | 30.03    | 20.67   | 32.14   | 8.67    | 11.91   | 6.20    | 1.6331 | 0.0012251  |
| gene:Sme2.5_00654.1_g00008.1 | 576.09   | 792.80  | 761.82  | 154.93  | 284.66  | 247.05  | 1.6333 | 3.39E-13   |
| gene:Sme2.5_00956.1_g00006.1 | 677.11   | 477.18  | 545.37  | 180.93  | 175.34  | 191.23  | 1.6343 | 1.60E-21   |
| gene:Sme2.5_16576.1_g00001.1 | 19.11    | 15.03   | 12.29   | 4.33    | 7.58    | 3.10    | 1.6346 | 0.01319957 |
| gene:Sme2.5_00556.1_g00009.1 | 295.78   | 266.77  | 296.79  | 46.59   | 141.79  | 87.86   | 1.6374 | 1.68E-07   |
| gene:Sme2.5_14454.1_g00002.1 | 100.11   | 46.03   | 63.33   | 35.75   | 15.15   | 16.54   | 1.6375 | 0.0001765  |
| novel.413                    | 18.20    | 32.88   | 25.52   | 5.42    | 11.91   | 7.24    | 1.6413 | 0.0024471  |
| gene:Sme2.5_01031.1_g00003.1 | 333.09   | 196.32  | 285.44  | 54.17   | 110.40  | 96.13   | 1.6438 | 9.20E-09   |
| gene:Sme2.5_05401.1_g00007.1 | 246.63   | 197.26  | 206.05  | 44.42   | 84.42   | 78.56   | 1.6471 | 4.44E-11   |
| gene:Sme2.5_00749.1_g00003.1 | 10708.12 | 6183.62 | 8554.82 | 3958.89 | 1499.05 | 2663.83 | 1.6476 | 0.00017357 |
| gene:Sme2.5_05686.1_g00004.1 | 369.50   | 298.71  | 378.07  | 72.59   | 154.78  | 106.47  | 1.6482 | 6.20E-11   |
| gene:Sme2.5_01849.1_g00002.1 | 2095.03  | 1472.87 | 1841.21 | 665.23  | 494.63  | 564.40  | 1.6495 | 8.11E-23   |
| gene:Sme2.5_12829.1_g00001.1 | 22.75    | 29.12   | 25.52   | 13.00   | 7.58    | 4.13    | 1.6523 | 0.00203904 |
| gene:Sme2.5_03783.1_g00001.1 | 216.60   | 218.86  | 227.79  | 57.42   | 75.76   | 77.53   | 1.6531 | 2.52E-17   |
| gene:Sme2.5_29481.1_g00001.1 | 20.93    | 11.27   | 21.74   | 7.58    | 7.58    | 2.07    | 1.6541 | 0.01226153 |
| gene:Sme2.5_02232.1_g00003.1 | 29.12    | 27.24   | 14.18   | 6.50    | 9.74    | 6.20    | 1.6551 | 0.003374   |
| gene:Sme2.5_00204.1_g00020.1 | 91.01    | 104.27  | 105.86  | 6.50    | 45.46   | 43.42   | 1.6571 | 0.00056817 |
| novel.1400                   | 150.16   | 127.75  | 172.02  | 54.17   | 33.55   | 54.79   | 1.6573 | 1.73E-10   |
| gene:Sme2.5_11232.1_g00002.1 | 730.80   | 739.25  | 782.61  | 202.60  | 273.83  | 236.72  | 1.6593 | 4.75E-31   |

|                              |         |         |         |         |         |         |        |            |
|------------------------------|---------|---------|---------|---------|---------|---------|--------|------------|
| gene:Sme2.5_07604.1_g00003.1 | 91.92   | 119.30  | 108.70  | 19.50   | 47.62   | 34.11   | 1.6595 | 2.36E-07   |
| gene:Sme2.5_00942.1_g00011.1 | 51.88   | 38.51   | 51.04   | 15.17   | 11.91   | 17.57   | 1.6616 | 1.70E-05   |
| gene:Sme2.5_08460.1_g00001.1 | 648.89  | 532.60  | 656.90  | 215.60  | 171.01  | 194.33  | 1.6620 | 3.93E-26   |
| gene:Sme2.5_00225.1_g00004.1 | 5680.78 | 4717.32 | 5107.75 | 1253.54 | 2006.67 | 1638.41 | 1.6624 | 1.88E-22   |
| gene:Sme2.5_04120.1_g00002.1 | 43.68   | 65.75   | 55.77   | 16.25   | 15.15   | 20.67   | 1.6626 | 6.08E-06   |
| gene:Sme2.5_01273.1_g00004.1 | 16.38   | 12.21   | 25.52   | 3.25    | 8.66    | 5.17    | 1.6642 | 0.01025603 |
| gene:Sme2.5_00019.1_g00005.1 | 616.13  | 460.27  | 549.15  | 140.85  | 214.30  | 157.12  | 1.6664 | 1.30E-17   |
| gene:Sme2.5_02555.1_g00008.1 | 29.12   | 24.42   | 31.19   | 11.92   | 6.49    | 8.27    | 1.6681 | 0.000631   |
| gene:Sme2.5_01984.1_g00010.1 | 1315.08 | 868.88  | 1156.90 | 104.01  | 569.31  | 377.30  | 1.6690 | 0.01222914 |
| gene:Sme2.5_00989.1_g00008.1 | 23.66   | 20.67   | 19.85   | 4.33    | 4.33    | 11.37   | 1.6718 | 0.00412997 |
| gene:Sme2.5_00916.1_g00007.1 | 18.20   | 26.30   | 23.63   | 4.33    | 9.74    | 7.24    | 1.6757 | 0.00239981 |
| gene:Sme2.5_09539.1_g00004.1 | 940.12  | 224.50  | 644.61  | 128.93  | 225.13  | 211.91  | 1.6766 | 0.0059305  |
| gene:Sme2.5_06043.1_g00003.1 | 31.85   | 32.88   | 34.03   | 8.67    | 9.74    | 12.40   | 1.6775 | 0.00015169 |
| gene:Sme2.5_00226.1_g00011.1 | 63.71   | 39.45   | 50.09   | 8.67    | 19.48   | 19.64   | 1.6794 | 5.47E-05   |
| gene:Sme2.5_17552.1_g00002.1 | 31.85   | 32.88   | 31.19   | 9.75    | 12.99   | 7.24    | 1.6815 | 0.0002244  |
| gene:Sme2.5_01285.1_g00002.1 | 50.05   | 52.60   | 45.37   | 13.00   | 23.81   | 9.30    | 1.6867 | 3.74E-05   |
| gene:Sme2.5_13865.1_g00002.1 | 607.94  | 500.66  | 583.18  | 172.27  | 141.79  | 210.87  | 1.6873 | 1.03E-21   |
| gene:Sme2.5_04939.1_g00004.1 | 4164.57 | 3044.37 | 3882.80 | 1146.28 | 1124.56 | 1171.18 | 1.6882 | 1.68E-35   |
| gene:Sme2.5_08558.1_g00001.1 | 217.51  | 153.11  | 212.67  | 40.09   | 71.43   | 69.26   | 1.6891 | 1.86E-10   |
| novel.2505                   | 75.54   | 55.42   | 78.45   | 15.17   | 22.73   | 26.88   | 1.6904 | 8.90E-07   |
| novel.1811                   | 38.22   | 48.85   | 43.48   | 6.50    | 16.24   | 17.57   | 1.6916 | 8.66E-05   |
| gene:Sme2.5_05385.1_g00008.1 | 167.46  | 140.90  | 148.39  | 32.50   | 45.46   | 63.06   | 1.6928 | 1.33E-10   |
| gene:Sme2.5_30343.1_g00001.1 | 657.99  | 677.26  | 696.60  | 165.77  | 261.93  | 200.54  | 1.6936 | 1.09E-22   |
| gene:Sme2.5_07081.1_g00006.1 | 90.10   | 81.72   | 86.01   | 20.59   | 19.48   | 39.28   | 1.6955 | 1.98E-07   |
| gene:Sme2.5_02721.1_g00005.1 | 3126.16 | 2017.68 | 2696.60 | 849.42  | 800.94  | 770.10  | 1.6958 | 6.92E-25   |
| gene:Sme2.5_01543.1_g00002.1 | 23.66   | 31.94   | 27.41   | 8.67    | 9.74    | 7.24    | 1.6960 | 0.0005138  |
| gene:Sme2.5_05302.1_g00002.1 | 169.28  | 201.02  | 177.69  | 54.17   | 66.02   | 48.58   | 1.7002 | 4.28E-15   |
| gene:Sme2.5_00641.1_g00006.1 | 34.58   | 42.27   | 27.41   | 9.75    | 14.07   | 8.27    | 1.7028 | 0.00019965 |
| gene:Sme2.5_07135.1_g00001.1 | 270.30  | 320.31  | 298.68  | 54.17   | 134.21  | 84.76   | 1.7031 | 8.51E-10   |
| gene:Sme2.5_00367.1_g00003.1 | 334.00  | 273.35  | 277.88  | 91.01   | 93.08   | 87.86   | 1.7033 | 1.90E-21   |

|                              |         |         |         |        |        |        |        |            |
|------------------------------|---------|---------|---------|--------|--------|--------|--------|------------|
| gene:Sme2.5_06456.1_g00003.1 | 374.05  | 399.22  | 445.18  | 115.93 | 156.94 | 101.30 | 1.7043 | 4.66E-19   |
| gene:Sme2.5_13912.1_g00002.1 | 30.03   | 32.88   | 31.19   | 11.92  | 10.82  | 6.20   | 1.7053 | 0.00024645 |
| gene:Sme2.5_07789.1_g00005.1 | 77.36   | 102.39  | 98.30   | 20.59  | 33.55  | 31.01  | 1.7057 | 1.36E-08   |
| gene:Sme2.5_18593.1_g00001.1 | 200.22  | 128.69  | 123.82  | 34.67  | 61.69  | 42.38  | 1.7073 | 1.48E-08   |
| gene:Sme2.5_00024.1_g00001.1 | 1339.65 | 881.09  | 1138.94 | 264.36 | 419.95 | 344.22 | 1.7078 | 7.86E-17   |
| gene:Sme2.5_01183.1_g00015.1 | 16.38   | 22.54   | 31.19   | 3.25   | 15.15  | 3.10   | 1.7091 | 0.01096452 |
| gene:Sme2.5_05439.1_g00004.1 | 40.04   | 64.81   | 51.98   | 15.17  | 15.15  | 17.57  | 1.7095 | 7.51E-06   |
| gene:Sme2.5_07055.1_g00005.1 | 40.95   | 33.82   | 26.47   | 4.33   | 18.40  | 8.27   | 1.7096 | 0.00131847 |
| gene:Sme2.5_00025.1_g00009.1 | 91.92   | 105.21  | 78.45   | 19.50  | 37.88  | 26.88  | 1.7100 | 5.10E-08   |
| gene:Sme2.5_01391.1_g00011.1 | 172.01  | 180.35  | 171.08  | 32.50  | 74.68  | 52.72  | 1.7108 | 3.95E-10   |
| novel.2261                   | 435.02  | 441.49  | 417.77  | 109.43 | 150.45 | 135.41 | 1.7109 | 2.60E-26   |
| gene:Sme2.5_02752.1_g00010.1 | 2004.02 | 1196.71 | 1668.24 | 541.72 | 442.68 | 499.27 | 1.7145 | 1.91E-19   |
| gene:Sme2.5_00776.1_g00015.1 | 50.97   | 49.78   | 46.31   | 14.08  | 16.24  | 14.47  | 1.7157 | 2.81E-06   |
| gene:Sme2.5_13256.1_g00001.1 | 900.08  | 776.83  | 818.53  | 162.52 | 369.08 | 226.38 | 1.7193 | 4.95E-12   |
| gene:Sme2.5_00999.1_g00003.1 | 200.22  | 216.99  | 211.72  | 49.84  | 74.68  | 66.16  | 1.7212 | 1.27E-16   |
| gene:Sme2.5_02195.1_g00012.1 | 33.67   | 26.30   | 66.16   | 18.42  | 2.16   | 17.57  | 1.7223 | 0.00533089 |
| gene:Sme2.5_03763.1_g00003.1 | 13.65   | 16.91   | 18.90   | 4.33   | 6.49   | 4.13   | 1.7263 | 0.00620107 |
| gene:Sme2.5_00113.1_g00014.1 | 170.19  | 53.54   | 96.41   | 37.92  | 20.56  | 38.25  | 1.7264 | 6.48E-05   |
| gene:Sme2.5_02064.1_g00002.1 | 164.73  | 148.41  | 122.87  | 60.67  | 38.96  | 32.04  | 1.7300 | 5.77E-10   |
| gene:Sme2.5_14790.1_g00001.1 | 68.26   | 57.30   | 48.20   | 13.00  | 24.89  | 14.47  | 1.7328 | 4.85E-06   |
| gene:Sme2.5_00654.1_g00007.1 | 204.77  | 269.59  | 268.43  | 63.92  | 96.33  | 63.06  | 1.7347 | 5.08E-14   |
| gene:Sme2.5_01960.1_g00004.1 | 81.91   | 98.63   | 74.67   | 8.67   | 38.96  | 28.94  | 1.7357 | 3.50E-05   |
| gene:Sme2.5_00009.1_g00016.1 | 539.68  | 672.56  | 615.31  | 117.01 | 216.47 | 213.97 | 1.7384 | 8.49E-15   |
| gene:Sme2.5_00136.1_g00026.1 | 321.26  | 296.83  | 349.72  | 97.51  | 89.83  | 102.34 | 1.7396 | 1.18E-24   |
| gene:Sme2.5_00155.1_g00013.1 | 320.35  | 276.16  | 338.37  | 99.68  | 96.33  | 83.73  | 1.7417 | 1.96E-22   |
| gene:Sme2.5_01637.1_g00001.1 | 26.39   | 22.54   | 22.68   | 6.50   | 5.41   | 9.30   | 1.7516 | 0.00094016 |
| gene:Sme2.5_00006.1_g00047.1 | 30.03   | 25.36   | 19.85   | 8.67   | 4.33   | 9.30   | 1.7524 | 0.00110293 |
| gene:Sme2.5_01649.1_g00012.1 | 117.40  | 670.68  | 395.09  | 97.51  | 123.39 | 130.25 | 1.7524 | 0.00961371 |
| gene:Sme2.5_09948.1_g00001.1 | 10.92   | 25.36   | 14.18   | 4.33   | 6.49   | 4.13   | 1.7547 | 0.00907132 |
| gene:Sme2.5_03228.1_g00006.1 | 277.58  | 319.37  | 342.16  | 47.67  | 137.46 | 93.03  | 1.7552 | 6.90E-09   |

|                              |         |         |         |        |         |         |        |            |
|------------------------------|---------|---------|---------|--------|---------|---------|--------|------------|
| gene:Sme2.5_00025.1_g00026.1 | 1258.65 | 1118.74 | 1146.50 | 228.61 | 439.43  | 373.16  | 1.7588 | 5.12E-17   |
| gene:Sme2.5_06347.1_g00001.1 | 269.39  | 372.91  | 254.25  | 83.42  | 109.32  | 72.36   | 1.7589 | 2.59E-14   |
| gene:Sme2.5_10927.1_g00004.1 | 60.07   | 25.36   | 44.42   | 16.25  | 9.74    | 12.40   | 1.7591 | 0.00018985 |
| gene:Sme2.5_00024.1_g00031.1 | 2044.97 | 1867.39 | 1902.65 | 565.56 | 597.46  | 553.03  | 1.7609 | 1.41E-67   |
| gene:Sme2.5_01314.1_g00007.1 | 707.14  | 735.50  | 734.40  | 108.34 | 330.12  | 202.60  | 1.7639 | 3.88E-09   |
| gene:Sme2.5_00374.1_g00001.1 | 93.74   | 67.63   | 59.55   | 20.59  | 24.89   | 19.64   | 1.7643 | 1.87E-07   |
| gene:Sme2.5_00378.1_g00010.1 | 90.10   | 75.15   | 73.72   | 15.17  | 31.39   | 23.77   | 1.7648 | 8.17E-08   |
| gene:Sme2.5_03748.1_g00005.1 | 181.11  | 131.51  | 173.91  | 37.92  | 67.11   | 38.25   | 1.7654 | 2.62E-10   |
| gene:Sme2.5_18471.1_g00001.1 | 229.34  | 230.14  | 242.91  | 46.59  | 82.26   | 77.53   | 1.7659 | 3.64E-15   |
| gene:Sme2.5_01929.1_g00008.1 | 753.55  | 282.74  | 523.63  | 188.52 | 100.66  | 168.49  | 1.7691 | 7.74E-08   |
| gene:Sme2.5_00372.1_g00010.1 | 19.11   | 12.21   | 12.29   | 4.33   | 4.33    | 4.13    | 1.7706 | 0.00916618 |
| gene:Sme2.5_01960.1_g00009.1 | 1012.02 | 816.28  | 919.66  | 276.28 | 265.17  | 263.59  | 1.7715 | 4.15E-40   |
| gene:Sme2.5_05882.1_g00001.1 | 339.46  | 206.65  | 295.84  | 61.76  | 107.15  | 77.53   | 1.7730 | 1.03E-11   |
| gene:Sme2.5_28714.1_g00002.1 | 4362.06 | 4015.64 | 4009.45 | 847.25 | 1567.24 | 1207.36 | 1.7741 | 8.69E-20   |
| gene:Sme2.5_05555.1_g00006.1 | 490.54  | 427.40  | 448.96  | 123.51 | 164.52  | 111.64  | 1.7753 | 1.83E-23   |
| gene:Sme2.5_00574.1_g00007.1 | 25.48   | 15.03   | 14.18   | 3.25   | 6.49    | 6.20    | 1.7775 | 0.00525916 |
| gene:Sme2.5_08145.1_g00005.1 | 34.58   | 21.60   | 24.57   | 5.42   | 14.07   | 4.13    | 1.7793 | 0.00187094 |
| gene:Sme2.5_02228.1_g00003.1 | 58.25   | 31.94   | 49.15   | 15.17  | 14.07   | 11.37   | 1.7812 | 2.32E-05   |
| novel.1633                   | 60.07   | 57.30   | 57.66   | 13.00  | 10.82   | 26.88   | 1.7814 | 5.34E-06   |
| gene:Sme2.5_16389.1_g00001.1 | 65.53   | 19.73   | 28.36   | 19.50  | 3.25    | 10.34   | 1.7814 | 0.00571305 |
| gene:Sme2.5_00837.1_g00004.1 | 17.29   | 18.79   | 22.68   | 4.33   | 7.58    | 5.17    | 1.7832 | 0.00241543 |
| gene:Sme2.5_07035.1_g00006.1 | 54.61   | 5.64    | 34.97   | 10.83  | 6.49    | 10.34   | 1.7833 | 0.01290056 |
| gene:Sme2.5_03383.1_g00003.1 | 104.66  | 128.69  | 148.39  | 42.25  | 30.31   | 38.25   | 1.7837 | 2.73E-11   |
| gene:Sme2.5_02326.1_g00001.1 | 247.54  | 197.26  | 224.95  | 50.92  | 85.51   | 57.89   | 1.7863 | 1.90E-14   |
| gene:Sme2.5_07225.1_g00002.1 | 44.59   | 50.72   | 40.64   | 9.75   | 15.15   | 14.47   | 1.7865 | 6.62E-06   |
| gene:Sme2.5_00226.1_g00019.1 | 42.77   | 29.12   | 34.97   | 6.50   | 15.15   | 9.30    | 1.7892 | 0.00014331 |
| gene:Sme2.5_00931.1_g00001.1 | 60.98   | 44.15   | 65.22   | 13.00  | 24.89   | 11.37   | 1.7930 | 8.44E-06   |
| gene:Sme2.5_01984.1_g00003.1 | 209.32  | 222.62  | 199.43  | 47.67  | 69.27   | 65.12   | 1.7933 | 9.39E-18   |
| gene:Sme2.5_02447.1_g00004.1 | 28.21   | 51.66   | 46.31   | 10.83  | 14.07   | 11.37   | 1.7981 | 4.50E-05   |
| gene:Sme2.5_05513.1_g00004.1 | 14.56   | 14.09   | 27.41   | 4.33   | 9.74    | 2.07    | 1.8017 | 0.00908056 |

|                              |          |          |          |         |         |         |        |            |
|------------------------------|----------|----------|----------|---------|---------|---------|--------|------------|
| gene:Sme2.5_19578.1_g00002.1 | 121.95   | 157.81   | 143.67   | 19.50   | 56.28   | 45.48   | 1.8028 | 4.37E-08   |
| gene:Sme2.5_13488.1_g00001.1 | 1472.53  | 907.39   | 1271.27  | 245.94  | 475.15  | 322.51  | 1.8069 | 1.84E-13   |
| gene:Sme2.5_00005.1_g00023.1 | 310.34   | 251.74   | 284.50   | 65.01   | 85.51   | 90.97   | 1.8088 | 4.23E-20   |
| gene:Sme2.5_00089.1_g00018.1 | 31.85    | 51.66    | 73.72    | 10.83   | 15.15   | 18.61   | 1.8146 | 4.62E-05   |
| gene:Sme2.5_00396.1_g00024.1 | 30.94    | 24.42    | 27.41    | 6.50    | 12.99   | 4.13    | 1.8149 | 0.00069892 |
| gene:Sme2.5_00926.1_g00009.1 | 77.36    | 59.18    | 85.07    | 18.42   | 27.06   | 17.57   | 1.8152 | 7.60E-08   |
| gene:Sme2.5_04477.1_g00003.1 | 265.75   | 215.11   | 235.35   | 30.34   | 73.60   | 99.23   | 1.8158 | 3.90E-08   |
| gene:Sme2.5_25873.1_g00001.1 | 182.93   | 228.26   | 185.26   | 70.42   | 37.88   | 60.99   | 1.8161 | 3.69E-13   |
| gene:Sme2.5_05409.1_g00002.1 | 9.10     | 52.60    | 35.92    | 6.50    | 10.82   | 10.34   | 1.8171 | 0.00509335 |
| gene:Sme2.5_12720.1_g00002.1 | 24.57    | 22.54    | 13.23    | 6.50    | 5.41    | 5.17    | 1.8232 | 0.00243764 |
| gene:Sme2.5_00057.1_g00016.1 | 69.17    | 64.81    | 99.24    | 5.42    | 31.39   | 28.94   | 1.8245 | 0.00012717 |
| gene:Sme2.5_07023.1_g00003.1 | 123.77   | 121.17   | 113.42   | 28.17   | 35.72   | 37.21   | 1.8245 | 5.01E-13   |
| gene:Sme2.5_00239.1_g00017.1 | 32.76    | 48.85    | 47.26    | 11.92   | 17.32   | 7.24    | 1.8248 | 4.00E-05   |
| gene:Sme2.5_00095.1_g00009.1 | 272.12   | 173.78   | 231.57   | 33.59   | 74.68   | 82.70   | 1.8255 | 4.47E-09   |
| gene:Sme2.5_01414.1_g00002.1 | 45.50    | 83.60    | 59.55    | 18.42   | 12.99   | 21.71   | 1.8256 | 2.76E-06   |
| gene:Sme2.5_00835.1_g00002.1 | 20.02    | 26.30    | 14.18    | 8.67    | 3.25    | 5.17    | 1.8258 | 0.00328902 |
| gene:Sme2.5_00261.1_g00014.1 | 198.40   | 112.72   | 150.28   | 30.34   | 60.61   | 39.28   | 1.8260 | 8.11E-09   |
| gene:Sme2.5_01562.1_g00009.1 | 51.88    | 31.94    | 33.08    | 4.33    | 14.07   | 14.47   | 1.8277 | 0.0002417  |
| gene:Sme2.5_02728.1_g00004.1 | 13.65    | 14.09    | 14.18    | 6.50    | 4.33    | 1.03    | 1.8303 | 0.01219611 |
| gene:Sme2.5_01534.1_g00008.1 | 55.52    | 36.63    | 48.20    | 7.58    | 17.32   | 14.47   | 1.8331 | 1.65E-05   |
| gene:Sme2.5_20171.1_g00001.1 | 379.51   | 374.79   | 379.02   | 58.51   | 158.02  | 101.30  | 1.8343 | 8.62E-11   |
| gene:Sme2.5_12681.1_g00001.1 | 742.63   | 1241.80  | 1031.19  | 164.68  | 403.72  | 276.00  | 1.8364 | 1.34E-10   |
| gene:Sme2.5_13486.1_g00001.1 | 637.97   | 860.43   | 643.67   | 185.27  | 203.48  | 210.87  | 1.8365 | 5.75E-28   |
| novel.2691                   | 81.00    | 46.97    | 86.01    | 18.42   | 28.14   | 13.44   | 1.8376 | 3.13E-06   |
| novel.204                    | 559.71   | 537.30   | 559.55   | 114.84  | 191.58  | 156.09  | 1.8405 | 1.46E-23   |
| novel.224                    | 17228.91 | 16627.10 | 17278.84 | 2959.96 | 6603.40 | 4674.37 | 1.8446 | 1.21E-15   |
| gene:Sme2.5_00038.1_g00006.1 | 24.57    | 26.30    | 14.18    | 2.17    | 8.66    | 7.24    | 1.8468 | 0.00312233 |
| gene:Sme2.5_00081.1_g00027.1 | 41.86    | 19.73    | 30.25    | 4.33    | 10.82   | 10.34   | 1.8475 | 0.00066316 |
| gene:Sme2.5_00739.1_g00003.1 | 147.43   | 55.42    | 100.19   | 5.42    | 49.79   | 28.94   | 1.8486 | 0.00110639 |
| gene:Sme2.5_06701.1_g00002.1 | 43.68    | 23.48    | 48.20    | 6.50    | 16.24   | 9.30    | 1.8498 | 0.00024374 |

|                              |         |        |         |        |        |        |        |            |
|------------------------------|---------|--------|---------|--------|--------|--------|--------|------------|
| gene:Sme2.5_12441.1_g00001.1 | 11.83   | 26.30  | 16.07   | 6.50   | 7.58   | 1.03   | 1.8502 | 0.00983999 |
| gene:Sme2.5_06068.1_g00001.1 | 240.26  | 275.22 | 275.99  | 36.84  | 94.16  | 87.86  | 1.8534 | 1.59E-10   |
| gene:Sme2.5_12504.1_g00002.1 | 55.52   | 40.39  | 38.75   | 4.33   | 15.15  | 17.57  | 1.8578 | 9.23E-05   |
| gene:Sme2.5_15084.1_g00001.1 | 261.20  | 246.10 | 272.21  | 58.51  | 71.43  | 84.76  | 1.8583 | 1.70E-21   |
| novel.1908                   | 1020.21 | 590.84 | 878.07  | 310.95 | 115.81 | 258.42 | 1.8610 | 1.92E-09   |
| gene:Sme2.5_08305.1_g00001.1 | 119.22  | 108.02 | 90.74   | 27.09  | 35.72  | 24.81  | 1.8619 | 4.97E-11   |
| gene:Sme2.5_03311.1_g00006.1 | 122.86  | 70.45  | 102.08  | 13.00  | 45.46  | 22.74  | 1.8643 | 6.92E-06   |
| novel.1390                   | 663.46  | 867.00 | 749.53  | 146.26 | 296.56 | 182.96 | 1.8655 | 4.63E-15   |
| gene:Sme2.5_07614.1_g00001.1 | 32.76   | 20.67  | 32.14   | 7.58   | 8.66   | 7.24   | 1.8671 | 0.00024103 |
| gene:Sme2.5_00226.1_g00033.1 | 584.28  | 402.97 | 456.52  | 136.51 | 122.31 | 136.45 | 1.8690 | 1.10E-23   |
| novel.2365                   | 26.39   | 32.88  | 26.47   | 7.58   | 6.49   | 9.30   | 1.8717 | 0.00015697 |
| gene:Sme2.5_01499.1_g00004.1 | 207.50  | 221.68 | 217.39  | 54.17  | 76.85  | 45.48  | 1.8751 | 5.76E-17   |
| gene:Sme2.5_01895.1_g00002.1 | 1555.34 | 904.58 | 1270.32 | 279.53 | 423.20 | 314.24 | 1.8752 | 1.80E-17   |
| gene:Sme2.5_04404.1_g00012.1 | 128.32  | 116.48 | 126.65  | 26.00  | 38.96  | 36.18  | 1.8759 | 2.90E-13   |
| gene:Sme2.5_01628.1_g00014.1 | 156.54  | 139.96 | 145.56  | 45.50  | 29.22  | 45.48  | 1.8774 | 2.48E-14   |
| gene:Sme2.5_00183.1_g00003.1 | 296.69  | 201.96 | 234.40  | 62.84  | 59.53  | 76.49  | 1.8813 | 8.11E-17   |
| gene:Sme2.5_00896.1_g00012.1 | 216.60  | 248.92 | 241.02  | 29.25  | 89.83  | 72.36  | 1.8831 | 2.79E-09   |
| gene:Sme2.5_09885.1_g00002.1 | 29.12   | 22.54  | 15.12   | 8.67   | 2.16   | 7.24   | 1.8851 | 0.00243886 |
| gene:Sme2.5_06980.1_g00002.1 | 11.83   | 12.21  | 11.34   | 2.17   | 3.25   | 4.13   | 1.8856 | 0.0125889  |
| gene:Sme2.5_08257.1_g00004.1 | 104.66  | 63.87  | 65.22   | 11.92  | 41.13  | 10.34  | 1.8861 | 0.00011885 |
| gene:Sme2.5_02159.1_g00012.1 | 761.75  | 765.55 | 763.71  | 135.43 | 282.49 | 200.54 | 1.8893 | 3.26E-17   |
| gene:Sme2.5_01232.1_g00022.1 | 24.57   | 17.85  | 32.14   | 2.17   | 5.41   | 12.40  | 1.8904 | 0.0025519  |
| gene:Sme2.5_12180.1_g00002.1 | 23.66   | 26.30  | 29.30   | 4.33   | 11.91  | 5.17   | 1.8913 | 0.00053747 |
| gene:Sme2.5_05147.1_g00003.1 | 15.47   | 13.15  | 18.90   | 2.17   | 5.41   | 5.17   | 1.8953 | 0.00495493 |
| gene:Sme2.5_02440.1_g00001.1 | 40.04   | 44.15  | 42.53   | 6.50   | 12.99  | 14.47  | 1.8960 | 8.75E-06   |
| novel.2228                   | 50.97   | 40.39  | 27.41   | 1.08   | 18.40  | 12.40  | 1.8963 | 0.0021558  |
| gene:Sme2.5_04022.1_g00002.1 | 31.85   | 32.88  | 26.47   | 5.42   | 9.74   | 9.30   | 1.8968 | 0.00010306 |
| gene:Sme2.5_05296.1_g00004.1 | 294.87  | 243.29 | 246.69  | 42.25  | 107.15 | 60.99  | 1.9001 | 7.05E-11   |
| gene:Sme2.5_16382.1_g00001.1 | 278.49  | 169.08 | 202.27  | 40.09  | 77.93  | 55.82  | 1.9029 | 3.00E-11   |
| gene:Sme2.5_04323.1_g00006.1 | 238.44  | 196.32 | 228.73  | 42.25  | 81.18  | 53.75  | 1.9056 | 1.65E-14   |



|                              |          |          |          |         |          |         |        |            |
|------------------------------|----------|----------|----------|---------|----------|---------|--------|------------|
| gene:Sme2.5_06456.1_g00002.1 | 43.68    | 40.39    | 39.70    | 17.34   | 3.25     | 12.40   | 1.9067 | 0.00010086 |
| gene:Sme2.5_09284.1_g00001.1 | 30.03    | 28.18    | 21.74    | 5.42    | 8.66     | 7.24    | 1.9078 | 0.00024839 |
| gene:Sme2.5_05393.1_g00002.1 | 1910.28  | 1285.94  | 1560.49  | 264.36  | 616.94   | 385.57  | 1.9088 | 5.95E-13   |
| gene:Sme2.5_01323.1_g00002.1 | 1054.79  | 680.08   | 840.27   | 310.95  | 114.73   | 259.46  | 1.9101 | 1.94E-10   |
| gene:Sme2.5_10020.1_g00002.1 | 334.00   | 468.73   | 434.78   | 66.09   | 162.35   | 100.27  | 1.9127 | 1.46E-11   |
| gene:Sme2.5_03824.1_g00001.1 | 654.35   | 429.27   | 545.37   | 94.26   | 205.65   | 132.31  | 1.9145 | 6.60E-13   |
| gene:Sme2.5_06196.1_g00004.1 | 1283.23  | 1041.72  | 1174.86  | 282.78  | 342.02   | 301.84  | 1.9174 | 4.30E-44   |
| gene:Sme2.5_03676.1_g00005.1 | 87.37    | 72.33    | 86.01    | 8.67    | 35.72    | 20.67   | 1.9175 | 2.51E-06   |
| novel.2480                   | 60.07    | 48.85    | 56.71    | 9.75    | 23.81    | 10.34   | 1.9189 | 3.33E-06   |
| gene:Sme2.5_03556.1_g00003.1 | 176.56   | 131.51   | 151.23   | 45.50   | 31.39    | 44.45   | 1.9197 | 3.63E-14   |
| gene:Sme2.5_01363.1_g00007.1 | 20.02    | 17.85    | 22.68    | 3.25    | 7.58     | 5.17    | 1.9207 | 0.00134714 |
| gene:Sme2.5_00358.1_g00011.1 | 628.87   | 567.36   | 549.15   | 108.34  | 206.73   | 145.75  | 1.9215 | 3.11E-19   |
| gene:Sme2.5_13587.1_g00002.1 | 62.80    | 30.06    | 40.64    | 13.00   | 14.07    | 8.27    | 1.9217 | 3.51E-05   |
| gene:Sme2.5_00009.1_g00008.1 | 32674.05 | 30407.08 | 31889.43 | 5797.49 | 10731.47 | 8475.26 | 1.9253 | 2.12E-23   |
| gene:Sme2.5_08916.1_g00005.1 | 1184.03  | 1363.91  | 1223.06  | 199.35  | 435.10   | 356.62  | 1.9277 | 2.30E-16   |
| gene:Sme2.5_10537.1_g00002.1 | 197.49   | 80.78    | 144.61   | 30.34   | 51.95    | 28.94   | 1.9284 | 2.20E-07   |
| gene:Sme2.5_13566.1_g00002.1 | 501.46   | 137.14   | 327.03   | 122.43  | 54.12    | 76.49   | 1.9323 | 0.00153426 |
| gene:Sme2.5_03876.1_g00003.1 | 104.66   | 99.57    | 105.86   | 31.42   | 32.47    | 17.57   | 1.9325 | 4.28E-11   |
| gene:Sme2.5_03284.1_g00005.1 | 75.54    | 60.12    | 71.83    | 10.83   | 24.89    | 18.61   | 1.9329 | 7.98E-08   |
| gene:Sme2.5_04303.1_g00003.1 | 73.72    | 39.45    | 57.66    | 16.25   | 12.99    | 15.51   | 1.9331 | 1.36E-06   |
| novel.1477                   | 139.24   | 142.78   | 146.50   | 35.75   | 44.38    | 32.04   | 1.9353 | 6.15E-16   |
| gene:Sme2.5_04886.1_g00003.1 | 201.13   | 185.99   | 179.58   | 40.09   | 57.36    | 50.65   | 1.9359 | 7.58E-19   |
| gene:Sme2.5_00048.1_g00021.1 | 273.03   | 231.08   | 248.58   | 46.59   | 96.33    | 53.75   | 1.9375 | 1.45E-13   |
| gene:Sme2.5_12982.1_g00001.1 | 3342.76  | 2229.97  | 2846.88  | 502.72  | 960.04   | 734.96  | 1.9378 | 1.09E-17   |
| novel.2762                   | 14.56    | 17.85    | 17.01    | 3.25    | 8.66     | 1.03    | 1.9414 | 0.00739722 |
| gene:Sme2.5_01645.1_g00010.1 | 19.11    | 12.21    | 26.47    | 2.17    | 8.66     | 4.13    | 1.9512 | 0.00412298 |
| gene:Sme2.5_02371.1_g00003.1 | 281.22   | 135.26   | 203.21   | 72.59   | 34.64    | 52.72   | 1.9544 | 3.34E-09   |
| gene:Sme2.5_09100.1_g00001.1 | 134.69   | 99.57    | 117.20   | 35.75   | 27.06    | 27.91   | 1.9552 | 1.33E-12   |
| gene:Sme2.5_03129.1_g00001.1 | 249.36   | 212.29   | 231.57   | 41.17   | 82.26    | 54.79   | 1.9604 | 2.66E-15   |
| gene:Sme2.5_00038.1_g00007.1 | 759.01   | 170.96   | 454.63   | 144.10  | 83.34    | 126.11  | 1.9695 | 0.00158493 |

|                              |         |         |         |        |        |        |        |            |
|------------------------------|---------|---------|---------|--------|--------|--------|--------|------------|
| gene:Sme2.5_00595.1_g00015.1 | 112.85  | 91.12   | 104.91  | 14.08  | 34.64  | 29.98  | 1.9714 | 1.39E-09   |
| gene:Sme2.5_06667.1_g00004.1 | 97.38   | 53.54   | 78.45   | 17.34  | 16.24  | 24.81  | 1.9720 | 8.21E-08   |
| gene:Sme2.5_01575.1_g00017.1 | 52.79   | 42.27   | 60.49   | 1.08   | 27.06  | 11.37  | 1.9776 | 0.00164462 |
| gene:Sme2.5_00112.1_g00032.1 | 637.06  | 510.06  | 644.61  | 148.43 | 143.95 | 161.26 | 1.9813 | 1.07E-35   |
| gene:Sme2.5_01270.1_g00009.1 | 1860.22 | 2716.54 | 2193.76 | 460.46 | 703.53 | 548.89 | 1.9829 | 1.18E-25   |
| gene:Sme2.5_03067.1_g00005.1 | 28.21   | 31.00   | 17.01   | 3.25   | 12.99  | 3.10   | 1.9843 | 0.00198608 |
| gene:Sme2.5_04919.1_g00008.1 | 358.58  | 396.40  | 362.95  | 49.84  | 140.71 | 92.00  | 1.9843 | 8.57E-12   |
| gene:Sme2.5_16603.1_g00001.1 | 197.49  | 109.90  | 154.06  | 32.50  | 47.62  | 36.18  | 1.9893 | 2.04E-11   |
| gene:Sme2.5_15542.1_g00001.1 | 350.38  | 286.50  | 356.33  | 109.43 | 45.46  | 95.10  | 1.9897 | 3.73E-13   |
| gene:Sme2.5_00096.1_g00020.1 | 313.07  | 216.99  | 264.65  | 81.26  | 40.05  | 78.56  | 1.9906 | 1.65E-13   |
| gene:Sme2.5_04071.1_g00007.1 | 91.92   | 70.45   | 84.12   | 9.75   | 36.80  | 15.51  | 1.9919 | 2.11E-06   |
| gene:Sme2.5_04375.1_g00011.1 | 1187.67 | 666.92  | 936.67  | 351.03 | 110.40 | 239.82 | 1.9929 | 9.66E-05   |
| novel.1686                   | 45.50   | 37.57   | 35.92   | 7.58   | 15.15  | 7.24   | 1.9931 | 1.22E-05   |
| gene:Sme2.5_03189.1_g00001.1 | 152.90  | 114.60  | 144.61  | 17.34  | 55.20  | 31.01  | 1.9935 | 1.58E-08   |
| gene:Sme2.5_00204.1_g00018.1 | 73.72   | 47.91   | 65.22   | 8.67   | 20.56  | 17.57  | 1.9961 | 4.91E-07   |
| novel.62                     | 161.09  | 47.91   | 106.81  | 27.09  | 32.47  | 19.64  | 1.9976 | 4.64E-06   |
| gene:Sme2.5_02465.1_g00002.1 | 1242.27 | 1409.94 | 1297.73 | 203.69 | 481.64 | 302.87 | 1.9990 | 1.38E-15   |
| gene:Sme2.5_00014.1_g00031.1 | 15.47   | 11.27   | 16.07   | 4.33   | 4.33   | 2.07   | 2.0023 | 0.00520886 |
| gene:Sme2.5_03303.1_g00008.1 | 55.52   | 49.78   | 69.94   | 17.34  | 9.74   | 16.54  | 2.0046 | 1.62E-07   |
| gene:Sme2.5_01887.1_g00010.1 | 151.07  | 154.99  | 160.68  | 44.42  | 32.47  | 39.28  | 2.0061 | 6.32E-18   |
| gene:Sme2.5_00577.1_g00012.1 | 40.04   | 43.21   | 41.59   | 11.92  | 15.15  | 4.13   | 2.0072 | 1.56E-05   |
| gene:Sme2.5_05772.1_g00002.1 | 83.73   | 132.45  | 104.91  | 18.42  | 27.06  | 34.11  | 2.0090 | 4.82E-10   |
| novel.748                    | 38.22   | 49.78   | 36.86   | 2.17   | 19.48  | 9.30   | 2.0129 | 0.00030124 |
| gene:Sme2.5_07439.1_g00002.1 | 1444.31 | 1206.10 | 1433.84 | 347.78 | 322.54 | 332.85 | 2.0256 | 2.81E-58   |
| gene:Sme2.5_03206.1_g00005.1 | 11.83   | 10.33   | 17.01   | 2.17   | 5.41   | 2.07   | 2.0261 | 0.00858697 |
| gene:Sme2.5_12708.1_g00002.1 | 11.83   | 16.91   | 10.40   | 2.17   | 4.33   | 3.10   | 2.0279 | 0.00726566 |
| gene:Sme2.5_24256.1_g00001.1 | 10.92   | 13.15   | 15.12   | 5.42   | 1.08   | 3.10   | 2.0294 | 0.00852211 |
| gene:Sme2.5_04454.1_g00010.1 | 181.11  | 79.84   | 126.65  | 20.59  | 41.13  | 33.08  | 2.0319 | 3.50E-08   |
| novel.873                    | 28.21   | 15.97   | 12.29   | 3.25   | 4.33   | 6.20   | 2.0321 | 0.00254949 |
| gene:Sme2.5_02464.1_g00007.1 | 61.89   | 102.39  | 79.40   | 15.17  | 15.15  | 28.94  | 2.0346 | 4.60E-08   |

|                              |         |         |         |        |        |        |        |            |
|------------------------------|---------|---------|---------|--------|--------|--------|--------|------------|
| gene:Sme2.5_02258.1_g00004.1 | 471.43  | 404.85  | 426.28  | 66.09  | 138.54 | 112.67 | 2.0371 | 4.20E-18   |
| gene:Sme2.5_00450.1_g00010.1 | 819.99  | 498.78  | 721.17  | 78.01  | 284.66 | 134.38 | 2.0372 | 0.00036436 |
| gene:Sme2.5_00954.1_g00006.1 | 23.66   | 24.42   | 26.47   | 4.33   | 7.58   | 6.20   | 2.0405 | 0.00017599 |
| gene:Sme2.5_05755.1_g00006.1 | 15.47   | 25.36   | 20.79   | 2.17   | 8.66   | 4.13   | 2.0436 | 0.00157632 |
| gene:Sme2.5_09702.1_g00002.1 | 91.92   | 50.72   | 64.27   | 8.67   | 22.73  | 18.61  | 2.0485 | 7.86E-07   |
| gene:Sme2.5_01099.1_g00011.1 | 25.48   | 17.85   | 9.45    | 1.08   | 6.49   | 5.17   | 2.0488 | 0.00581866 |
| gene:Sme2.5_01674.1_g00007.1 | 50.97   | 62.94   | 71.83   | 11.92  | 19.48  | 13.44  | 2.0510 | 3.76E-08   |
| gene:Sme2.5_05686.1_g00003.1 | 176.56  | 155.93  | 188.09  | 23.84  | 49.79  | 51.68  | 2.0525 | 1.63E-13   |
| novel.2249                   | 425.01  | 267.71  | 346.88  | 66.09  | 92.00  | 92.00  | 2.0551 | 4.58E-19   |
| gene:Sme2.5_00026.1_g00023.1 | 178.38  | 29.12   | 120.98  | 42.25  | 14.07  | 22.74  | 2.0556 | 0.00031181 |
| gene:Sme2.5_07333.1_g00001.1 | 1366.04 | 1100.90 | 1325.14 | 307.70 | 310.63 | 292.54 | 2.0580 | 1.88E-54   |
| gene:Sme2.5_07413.1_g00002.1 | 28.21   | 37.57   | 32.14   | 6.50   | 10.82  | 6.20   | 2.0596 | 2.68E-05   |
| gene:Sme2.5_06827.1_g00006.1 | 35.49   | 44.15   | 40.64   | 6.50   | 10.82  | 11.37  | 2.0646 | 3.02E-06   |
| gene:Sme2.5_00003.1_g00050.1 | 41.86   | 51.66   | 40.64   | 7.58   | 15.15  | 9.30   | 2.0675 | 1.59E-06   |
| gene:Sme2.5_00441.1_g00012.1 | 442.30  | 325.95  | 413.99  | 89.93  | 84.42  | 107.50 | 2.0675 | 8.41E-27   |
| gene:Sme2.5_21330.1_g00001.1 | 699.86  | 273.35  | 488.66  | 110.51 | 110.40 | 125.08 | 2.0790 | 1.63E-12   |
| gene:Sme2.5_16214.1_g00002.1 | 56.43   | 45.09   | 24.57   | 3.25   | 15.15  | 11.37  | 2.0817 | 0.00014938 |
| gene:Sme2.5_04059.1_g00001.1 | 20.93   | 26.30   | 16.07   | 0.00   | 8.66   | 6.20   | 2.0880 | 0.00373085 |
| gene:Sme2.5_02865.1_g00006.1 | 9.10    | 12.21   | 10.40   | 2.17   | 1.08   | 4.13   | 2.0925 | 0.01376444 |
| gene:Sme2.5_02111.1_g00008.1 | 267.57  | 177.53  | 246.69  | 29.25  | 77.93  | 54.79  | 2.0946 | 2.26E-11   |
| gene:Sme2.5_01116.1_g00003.1 | 11.83   | 23.48   | 10.40   | 5.42   | 3.25   | 2.07   | 2.0956 | 0.00552895 |
| gene:Sme2.5_09910.1_g00001.1 | 920.10  | 916.79  | 965.03  | 115.93 | 317.13 | 222.24 | 2.0961 | 2.28E-14   |
| gene:Sme2.5_01873.1_g00007.1 | 30.03   | 16.91   | 26.47   | 7.58   | 8.66   | 1.03   | 2.0968 | 0.00113909 |
| gene:Sme2.5_06413.1_g00004.1 | 183.84  | 159.69  | 168.24  | 39.00  | 36.80  | 43.42  | 2.1010 | 1.63E-20   |
| gene:Sme2.5_13996.1_g00001.1 | 83.73   | 54.48   | 85.07   | 13.00  | 12.99  | 25.84  | 2.1020 | 5.29E-08   |
| gene:Sme2.5_01418.1_g00002.1 | 929.20  | 645.32  | 811.91  | 211.27 | 172.09 | 172.63 | 2.1022 | 2.98E-32   |
| gene:Sme2.5_17732.1_g00001.1 | 202.95  | 197.26  | 218.34  | 37.92  | 62.78  | 43.42  | 2.1026 | 6.13E-20   |
| gene:Sme2.5_25116.1_g00001.1 | 116.49  | 129.63  | 111.53  | 23.84  | 35.72  | 23.77  | 2.1034 | 2.45E-14   |
| gene:Sme2.5_01050.1_g00004.1 | 13.65   | 15.03   | 21.74   | 2.17   | 5.41   | 4.13   | 2.1040 | 0.00219277 |
| gene:Sme2.5_14233.1_g00002.1 | 54.61   | 44.15   | 66.16   | 8.67   | 15.15  | 14.47  | 2.1047 | 1.60E-07   |

|                              |         |         |         |        |        |        |        |            |
|------------------------------|---------|---------|---------|--------|--------|--------|--------|------------|
| gene:Sme2.5_02225.1_g00004.1 | 61.89   | 65.75   | 55.77   | 5.42   | 21.65  | 15.51  | 2.1061 | 5.81E-07   |
| gene:Sme2.5_02491.1_g00008.1 | 29.12   | 22.54   | 31.19   | 9.75   | 4.33   | 5.17   | 2.1087 | 0.00010786 |
| gene:Sme2.5_04707.1_g00005.1 | 303.06  | 68.57   | 225.90  | 63.92  | 25.98  | 48.58  | 2.1093 | 0.0021205  |
| novel.2336                   | 239.35  | 169.08  | 195.65  | 42.25  | 59.53  | 38.25  | 2.1110 | 4.39E-17   |
| gene:Sme2.5_01962.1_g00002.1 | 251.18  | 163.44  | 220.23  | 66.09  | 28.14  | 51.68  | 2.1211 | 1.50E-12   |
| gene:Sme2.5_00170.1_g00011.1 | 15.47   | 22.54   | 17.96   | 4.33   | 6.49   | 2.07   | 2.1243 | 0.0012543  |
| gene:Sme2.5_25333.1_g00001.1 | 1231.35 | 557.02  | 963.14  | 202.60 | 222.96 | 203.64 | 2.1288 | 2.50E-17   |
| gene:Sme2.5_00232.1_g00020.1 | 1541.69 | 1309.43 | 1509.45 | 256.78 | 384.23 | 355.59 | 2.1292 | 1.36E-38   |
| gene:Sme2.5_08311.1_g00001.1 | 121.04  | 79.84   | 86.01   | 11.92  | 35.72  | 17.57  | 2.1394 | 4.21E-08   |
| novel.1665                   | 195.67  | 49.78   | 127.60  | 36.84  | 20.56  | 26.88  | 2.1469 | 2.69E-06   |
| gene:Sme2.5_00089.1_g00024.1 | 18.20   | 18.79   | 10.40   | 5.42   | 2.16   | 3.10   | 2.1518 | 0.00293031 |
| gene:Sme2.5_12095.1_g00002.1 | 14.56   | 24.42   | 13.23   | 5.42   | 2.16   | 4.13   | 2.1549 | 0.0019705  |
| gene:Sme2.5_06032.1_g00003.1 | 181.11  | 199.14  | 191.87  | 37.92  | 59.53  | 31.01  | 2.1576 | 1.58E-17   |
| gene:Sme2.5_03333.1_g00005.1 | 40.95   | 82.66   | 42.53   | 13.00  | 6.49   | 17.57  | 2.1598 | 6.50E-06   |
| gene:Sme2.5_05517.1_g00007.1 | 84.64   | 51.66   | 59.55   | 16.25  | 17.32  | 10.34  | 2.1615 | 3.03E-08   |
| gene:Sme2.5_02966.1_g00007.1 | 20.93   | 21.60   | 19.85   | 7.58   | 4.33   | 2.07   | 2.1655 | 0.0005696  |
| gene:Sme2.5_07375.1_g00006.1 | 189.30  | 140.90  | 172.02  | 19.50  | 56.28  | 36.18  | 2.1656 | 2.25E-11   |
| gene:Sme2.5_06200.1_g00003.1 | 8.19    | 18.79   | 11.34   | 2.17   | 2.16   | 4.13   | 2.1709 | 0.00743476 |
| gene:Sme2.5_01411.1_g00007.1 | 70.99   | 26.30   | 51.98   | 10.83  | 15.15  | 7.24   | 2.1718 | 1.61E-05   |
| gene:Sme2.5_01573.1_g00003.1 | 32.76   | 30.06   | 28.36   | 7.58   | 4.33   | 8.27   | 2.1727 | 2.05E-05   |
| gene:Sme2.5_03149.1_g00005.1 | 49.14   | 19.73   | 32.14   | 3.25   | 10.82  | 8.27   | 2.1763 | 0.00016675 |
| gene:Sme2.5_00365.1_g00001.1 | 254.83  | 486.57  | 362.00  | 26.00  | 135.29 | 82.70  | 2.1770 | 0.00110334 |
| gene:Sme2.5_00085.1_g00048.1 | 20.02   | 46.03   | 35.92   | 6.50   | 9.74   | 6.20   | 2.1845 | 5.21E-05   |
| gene:Sme2.5_04467.1_g00008.1 | 101.02  | 94.87   | 104.91  | 17.34  | 24.89  | 23.77  | 2.1871 | 6.51E-14   |
| gene:Sme2.5_02899.1_g00006.1 | 81.91   | 82.66   | 58.60   | 9.75   | 20.56  | 18.61  | 2.1882 | 3.00E-09   |
| gene:Sme2.5_29912.1_g00001.1 | 2000.38 | 1804.45 | 2028.36 | 278.44 | 592.04 | 409.34 | 2.1884 | 2.94E-22   |
| gene:Sme2.5_00519.1_g00011.1 | 44.59   | 65.75   | 62.38   | 13.00  | 20.56  | 4.13   | 2.2019 | 3.06E-06   |
| novel.1597                   | 11.83   | 21.60   | 16.07   | 3.25   | 7.58   | 0.00   | 2.2033 | 0.00673127 |
| gene:Sme2.5_06413.1_g00002.1 | 2915.93 | 1984.81 | 2608.70 | 277.36 | 804.18 | 545.79 | 2.2062 | 3.57E-07   |
| gene:Sme2.5_01270.1_g00012.1 | 20.93   | 11.27   | 12.29   | 4.33   | 4.33   | 1.03   | 2.2084 | 0.0041179  |

|                              |          |          |          |         |         |         |        |            |
|------------------------------|----------|----------|----------|---------|---------|---------|--------|------------|
| gene:Sme2.5_08697.1_g00002.1 | 245.72   | 572.99   | 358.22   | 86.68   | 84.42   | 82.70   | 2.2132 | 1.48E-14   |
| gene:Sme2.5_16496.1_g00002.1 | 179.29   | 152.17   | 176.75   | 23.84   | 40.05   | 45.48   | 2.2137 | 2.48E-17   |
| gene:Sme2.5_12504.1_g00003.1 | 19.11    | 8.45     | 17.01    | 5.42    | 1.08    | 3.10    | 2.2165 | 0.00486528 |
| gene:Sme2.5_00505.1_g00002.1 | 230.25   | 194.44   | 236.29   | 43.34   | 55.20   | 43.42   | 2.2202 | 2.23E-24   |
| gene:Sme2.5_03896.1_g00007.1 | 63.71    | 62.94    | 72.78    | 10.83   | 19.48   | 12.40   | 2.2242 | 9.95E-10   |
| gene:Sme2.5_03549.1_g00005.1 | 118.31   | 69.51    | 71.83    | 20.59   | 20.56   | 14.47   | 2.2262 | 1.04E-09   |
| gene:Sme2.5_00701.1_g00009.1 | 489.63   | 372.91   | 456.52   | 80.17   | 104.99  | 96.13   | 2.2293 | 4.84E-33   |
| novel.2510                   | 9.10     | 17.85    | 22.68    | 0.00    | 3.25    | 7.24    | 2.2305 | 0.00775901 |
| novel.2618                   | 142.88   | 83.60    | 118.15   | 8.67    | 35.72   | 28.94   | 2.2315 | 6.18E-08   |
| gene:Sme2.5_07695.1_g00006.1 | 232.07   | 107.08   | 182.42   | 49.84   | 25.98   | 35.15   | 2.2336 | 8.07E-11   |
| gene:Sme2.5_05225.1_g00001.1 | 47.32    | 21.60    | 26.47    | 5.42    | 9.74    | 5.17    | 2.2346 | 8.20E-05   |
| gene:Sme2.5_00010.1_g00024.1 | 18.20    | 19.73    | 22.68    | 5.42    | 6.49    | 1.03    | 2.2370 | 0.00072145 |
| gene:Sme2.5_00441.1_g00013.1 | 59.16    | 42.27    | 34.03    | 3.25    | 14.07   | 11.37   | 2.2377 | 9.16E-06   |
| gene:Sme2.5_00033.1_g00008.1 | 222.06   | 115.54   | 190.93   | 36.84   | 30.31   | 44.45   | 2.2425 | 2.56E-13   |
| novel.1553                   | 65.53    | 35.69    | 51.04    | 4.33    | 20.56   | 7.24    | 2.2477 | 2.21E-05   |
| gene:Sme2.5_29129.1_g00001.1 | 67.35    | 56.36    | 64.27    | 5.42    | 19.48   | 14.47   | 2.2542 | 4.68E-08   |
| gene:Sme2.5_00010.1_g00008.1 | 36.40    | 10.33    | 19.85    | 8.67    | 4.33    | 1.03    | 2.2558 | 0.00312118 |
| gene:Sme2.5_01139.1_g00005.1 | 229.34   | 129.63   | 150.28   | 34.67   | 34.64   | 37.21   | 2.2575 | 9.06E-15   |
| novel.2426                   | 77.36    | 57.30    | 38.75    | 4.33    | 17.32   | 14.47   | 2.2619 | 2.98E-06   |
| gene:Sme2.5_03824.1_g00006.1 | 133.78   | 185.99   | 176.75   | 16.25   | 51.95   | 35.15   | 2.2638 | 3.27E-11   |
| gene:Sme2.5_00162.1_g00012.1 | 152.90   | 355.07   | 262.76   | 35.75   | 72.52   | 51.68   | 2.2684 | 2.31E-11   |
| gene:Sme2.5_13149.1_g00003.1 | 54.61    | 35.69    | 53.88    | 7.58    | 16.24   | 6.20    | 2.2685 | 1.23E-06   |
| gene:Sme2.5_10022.1_g00002.1 | 26.39    | 35.69    | 35.92    | 8.67    | 8.66    | 3.10    | 2.2689 | 1.61E-05   |
| gene:Sme2.5_12436.1_g00001.1 | 52.79    | 28.18    | 53.88    | 19.50   | 3.25    | 5.17    | 2.2762 | 0.00012779 |
| novel.2417                   | 17.29    | 7.51     | 11.34    | 2.17    | 3.25    | 2.07    | 2.2765 | 0.00669109 |
| gene:Sme2.5_01484.1_g00002.1 | 19575.12 | 11401.60 | 15811.92 | 4714.05 | 1666.81 | 3225.13 | 2.2842 | 4.46E-07   |
| gene:Sme2.5_00048.1_g00028.1 | 55.52    | 51.66    | 53.88    | 17.34   | 3.25    | 12.40   | 2.2864 | 6.17E-07   |
| novel.1029                   | 145.61   | 123.99   | 131.38   | 28.17   | 31.39   | 22.74   | 2.2871 | 4.34E-18   |
| gene:Sme2.5_08782.1_g00003.1 | 45.50    | 35.69    | 49.15    | 0.00    | 18.40   | 8.27    | 2.2895 | 0.00054802 |
| novel.2751                   | 172.92   | 146.54   | 188.09   | 10.83   | 64.94   | 27.91   | 2.2921 | 2.10E-07   |

|                              |         |         |         |        |        |        |        |            |
|------------------------------|---------|---------|---------|--------|--------|--------|--------|------------|
| novel. 2073                  | 45.50   | 49.78   | 35.92   | 6.50   | 11.91  | 8.27   | 2.2993 | 3.28E-07   |
| gene:Sme2.5_01183.1_g00014.1 | 30.94   | 31.94   | 26.47   | 4.33   | 8.66   | 5.17   | 2.3008 | 1.48E-05   |
| gene:Sme2.5_02323.1_g00005.1 | 11.83   | 28.18   | 28.36   | 3.25   | 5.41   | 5.17   | 2.3023 | 0.0004471  |
| gene:Sme2.5_08815.1_g00004.1 | 40.04   | 47.91   | 53.88   | 6.50   | 7.58   | 14.47  | 2.3052 | 2.42E-07   |
| novel. 2796                  | 176.56  | 198.20  | 187.15  | 26.00  | 55.20  | 32.04  | 2.3121 | 1.59E-17   |
| gene:Sme2.5_15956.1_g00001.1 | 55.52   | 45.09   | 52.93   | 13.00  | 6.49   | 11.37  | 2.3134 | 2.87E-08   |
| gene:Sme2.5_04638.1_g00002.1 | 119.22  | 158.75  | 124.76  | 32.50  | 15.15  | 33.08  | 2.3161 | 8.27E-14   |
| gene:Sme2.5_08938.1_g00002.1 | 1286.87 | 901.76  | 973.54  | 193.94 | 245.69 | 194.33 | 2.3189 | 4.08E-38   |
| gene:Sme2.5_00083.1_g00005.1 | 339.46  | 292.13  | 352.55  | 42.25  | 86.59  | 68.22  | 2.3199 | 2.04E-22   |
| gene:Sme2.5_00003.1_g00004.1 | 31.85   | 19.73   | 29.30   | 0.00   | 10.82  | 5.17   | 2.3388 | 0.00083564 |
| gene:Sme2.5_00622.1_g00024.1 | 21.84   | 30.06   | 18.90   | 1.08   | 11.91  | 1.03   | 2.3432 | 0.00265842 |
| gene:Sme2.5_01173.1_g00012.1 | 269.39  | 205.71  | 261.81  | 42.25  | 60.61  | 42.38  | 2.3444 | 4.46E-24   |
| gene:Sme2.5_12070.1_g00002.1 | 1869.32 | 1242.73 | 1670.13 | 232.94 | 369.08 | 336.98 | 2.3483 | 1.22E-30   |
| gene:Sme2.5_00629.1_g00001.1 | 384.06  | 381.37  | 351.61  | 62.84  | 79.01  | 76.49  | 2.3545 | 1.84E-41   |
| gene:Sme2.5_16438.1_g00001.1 | 109.21  | 94.87   | 96.41   | 16.25  | 17.32  | 24.81  | 2.3604 | 1.29E-14   |
| gene:Sme2.5_20540.1_g00002.1 | 54.61   | 41.33   | 52.93   | 2.17   | 16.24  | 10.34  | 2.3721 | 2.68E-06   |
| gene:Sme2.5_08275.1_g00002.1 | 275.76  | 315.62  | 312.85  | 69.34  | 49.79  | 54.79  | 2.3788 | 3.32E-33   |
| gene:Sme2.5_03549.1_g00006.1 | 1480.72 | 848.22  | 1288.28 | 217.77 | 230.54 | 243.95 | 2.3854 | 1.22E-31   |
| gene:Sme2.5_00950.1_g00010.1 | 552.42  | 310.92  | 488.66  | 42.25  | 115.81 | 100.27 | 2.3873 | 2.07E-13   |
| gene:Sme2.5_04906.1_g00008.1 | 364.95  | 226.38  | 277.88  | 42.25  | 58.45  | 65.12  | 2.3890 | 3.33E-21   |
| gene:Sme2.5_06480.1_g00005.1 | 28.21   | 15.03   | 23.63   | 2.17   | 3.25   | 7.24   | 2.3935 | 0.00030863 |
| gene:Sme2.5_03274.1_g00005.1 | 10.01   | 9.39    | 8.51    | 1.08   | 1.08   | 3.10   | 2.3947 | 0.01144549 |
| gene:Sme2.5_15507.1_g00002.1 | 17.29   | 6.58    | 20.79   | 2.17   | 1.08   | 5.17   | 2.3973 | 0.00462554 |
| gene:Sme2.5_11315.1_g00001.1 | 188.39  | 136.20  | 144.61  | 10.83  | 32.47  | 45.48  | 2.3983 | 2.54E-10   |
| gene:Sme2.5_14802.1_g00001.1 | 154.72  | 136.20  | 137.05  | 16.25  | 36.80  | 27.91  | 2.4019 | 1.19E-16   |
| gene:Sme2.5_02165.1_g00001.1 | 71.90   | 43.21   | 87.90   | 17.34  | 8.66   | 12.40  | 2.4029 | 2.32E-08   |
| gene:Sme2.5_08647.1_g00003.1 | 30.94   | 45.09   | 31.19   | 0.00   | 14.07  | 6.20   | 2.4034 | 0.00033362 |
| gene:Sme2.5_02774.1_g00009.1 | 343.10  | 245.17  | 270.32  | 46.59  | 71.43  | 44.45  | 2.4036 | 3.34E-23   |
| gene:Sme2.5_00420.1_g00001.1 | 45.50   | 25.36   | 35.92   | 6.50   | 3.25   | 10.34  | 2.4044 | 9.30E-06   |
| gene:Sme2.5_00433.1_g00012.1 | 411.36  | 201.96  | 393.19  | 101.84 | 32.47  | 54.79  | 2.4127 | 1.12E-10   |

|                              |         |         |         |        |        |        |        |            |
|------------------------------|---------|---------|---------|--------|--------|--------|--------|------------|
| gene:Sme2.5_10606.1_g00001.1 | 212.96  | 203.83  | 206.99  | 17.34  | 55.20  | 44.45  | 2.4137 | 1.13E-14   |
| gene:Sme2.5_00064.1_g00006.1 | 35.49   | 23.48   | 26.47   | 7.58   | 5.41   | 3.10   | 2.4150 | 2.23E-05   |
| gene:Sme2.5_00033.1_g00007.1 | 650.71  | 308.10  | 490.55  | 73.67  | 98.49  | 98.20  | 2.4222 | 3.91E-19   |
| gene:Sme2.5_24786.1_g00001.1 | 20.02   | 16.91   | 8.51    | 2.17   | 1.08   | 5.17   | 2.4224 | 0.00287943 |
| gene:Sme2.5_25758.1_g00001.1 | 120.13  | 79.84   | 108.70  | 14.08  | 23.81  | 19.64  | 2.4235 | 2.52E-13   |
| gene:Sme2.5_01620.1_g00010.1 | 81.91   | 58.24   | 77.50   | 4.33   | 22.73  | 13.44  | 2.4261 | 5.99E-08   |
| gene:Sme2.5_01379.1_g00011.1 | 835.46  | 585.20  | 710.78  | 97.51  | 165.60 | 133.35 | 2.4266 | 3.42E-30   |
| gene:Sme2.5_15762.1_g00001.1 | 10.01   | 9.39    | 9.45    | 2.17   | 3.25   | 0.00   | 2.4288 | 0.01193184 |
| gene:Sme2.5_02228.1_g00005.1 | 84.64   | 78.90   | 71.83   | 6.50   | 14.07  | 22.74  | 2.4356 | 4.40E-10   |
| gene:Sme2.5_12101.1_g00002.1 | 65.53   | 62.00   | 63.33   | 16.25  | 8.66   | 10.34  | 2.4388 | 1.59E-10   |
| gene:Sme2.5_00133.1_g00004.1 | 3711.35 | 3674.66 | 3648.39 | 420.38 | 931.90 | 682.24 | 2.4392 | 1.79E-26   |
| gene:Sme2.5_02824.1_g00004.1 | 1051.15 | 714.83  | 976.37  | 178.77 | 163.43 | 163.32 | 2.4398 | 5.07E-43   |
| gene:Sme2.5_02000.1_g00013.1 | 71.90   | 103.33  | 81.29   | 20.59  | 14.07  | 12.40  | 2.4488 | 3.45E-12   |
| gene:Sme2.5_01907.1_g00015.1 | 338.55  | 308.10  | 340.26  | 78.01  | 55.20  | 47.55  | 2.4511 | 2.57E-32   |
| gene:Sme2.5_01699.1_g00005.1 | 32.76   | 49.78   | 51.98   | 8.67   | 9.74   | 6.20   | 2.4530 | 1.49E-07   |
| gene:Sme2.5_03180.1_g00002.1 | 1428.84 | 393.58  | 990.55  | 143.01 | 215.39 | 155.05 | 2.4539 | 6.45E-06   |
| gene:Sme2.5_02985.1_g00003.1 | 42.77   | 37.57   | 42.53   | 4.33   | 12.99  | 5.17   | 2.4540 | 7.32E-07   |
| gene:Sme2.5_02985.1_g00004.1 | 46.41   | 29.12   | 47.26   | 3.25   | 11.91  | 7.24   | 2.4557 | 2.26E-06   |
| novel.1883                   | 54.61   | 98.63   | 59.55   | 14.08  | 12.99  | 11.37  | 2.4695 | 1.20E-09   |
| gene:Sme2.5_12736.1_g00002.1 | 23.66   | 29.12   | 30.25   | 6.50   | 5.41   | 3.10   | 2.4724 | 1.35E-05   |
| gene:Sme2.5_09573.1_g00001.1 | 25.48   | 19.73   | 19.85   | 2.17   | 5.41   | 4.13   | 2.4732 | 0.00011413 |
| gene:Sme2.5_00367.1_g00014.1 | 1408.82 | 877.34  | 1222.12 | 191.77 | 225.13 | 213.97 | 2.4754 | 5.57E-39   |
| novel.3296                   | 29.12   | 43.21   | 40.64   | 4.33   | 10.82  | 5.17   | 2.4770 | 1.65E-06   |
| gene:Sme2.5_31555.1_g00001.1 | 93.74   | 38.51   | 51.98   | 13.00  | 8.66   | 11.37  | 2.4804 | 1.41E-07   |
| gene:Sme2.5_01363.1_g00012.1 | 10.92   | 4.70    | 14.18   | 1.08   | 2.16   | 2.07   | 2.4844 | 0.01078188 |
| gene:Sme2.5_05590.1_g00002.1 | 43.68   | 41.33   | 46.31   | 2.17   | 9.74   | 11.37  | 2.4898 | 4.50E-07   |
| novel.2337                   | 202.04  | 139.02  | 173.91  | 17.34  | 41.13  | 33.08  | 2.4914 | 3.52E-16   |
| gene:Sme2.5_08404.1_g00003.1 | 12.74   | 10.33   | 18.90   | 1.08   | 3.25   | 3.10   | 2.4935 | 0.0021124  |
| gene:Sme2.5_11201.1_g00001.1 | 21.84   | 68.57   | 35.92   | 2.17   | 12.99  | 7.24   | 2.4957 | 7.53E-05   |
| gene:Sme2.5_01709.1_g00005.1 | 121.95  | 87.36   | 120.98  | 17.34  | 18.40  | 22.74  | 2.4959 | 1.77E-15   |

|                              |         |         |         |        |        |        |        |            |
|------------------------------|---------|---------|---------|--------|--------|--------|--------|------------|
| gene:Sme2.5_00003.1_g00035.1 | 412.27  | 183.17  | 319.47  | 55.26  | 53.03  | 53.75  | 2.4976 | 2.99E-17   |
| gene:Sme2.5_06310.1_g00004.1 | 295.78  | 201.02  | 276.94  | 43.34  | 54.12  | 39.28  | 2.5020 | 6.89E-25   |
| gene:Sme2.5_01314.1_g00005.1 | 78.27   | 105.21  | 119.09  | 13.00  | 25.98  | 14.47  | 2.5025 | 1.38E-12   |
| gene:Sme2.5_00001.1_g00049.1 | 70.99   | 46.03   | 52.93   | 10.83  | 10.82  | 8.27   | 2.5087 | 2.45E-09   |
| gene:Sme2.5_10640.1_g00001.1 | 60.07   | 50.72   | 53.88   | 8.67   | 12.99  | 7.24   | 2.5147 | 1.24E-09   |
| gene:Sme2.5_02148.1_g00005.1 | 38.22   | 23.48   | 17.96   | 1.08   | 10.82  | 2.07   | 2.5178 | 0.00058973 |
| gene:Sme2.5_00108.1_g00003.1 | 72.81   | 56.36   | 60.49   | 13.00  | 12.99  | 7.24   | 2.5185 | 1.80E-10   |
| gene:Sme2.5_11338.1_g00001.1 | 219.33  | 267.71  | 218.34  | 45.50  | 38.96  | 38.25  | 2.5238 | 6.67E-30   |
| gene:Sme2.5_00398.1_g00006.1 | 173.83  | 127.75  | 157.85  | 24.92  | 25.98  | 28.94  | 2.5238 | 6.23E-21   |
| gene:Sme2.5_00406.1_g00020.1 | 10.01   | 9.39    | 11.34   | 2.17   | 2.16   | 1.03   | 2.5251 | 0.00586394 |
| gene:Sme2.5_00669.1_g00002.1 | 12.74   | 10.33   | 19.85   | 2.17   | 2.16   | 3.10   | 2.5254 | 0.00163163 |
| gene:Sme2.5_00378.1_g00009.1 | 20.02   | 15.97   | 12.29   | 0.00   | 0.00   | 8.27   | 2.5266 | 0.01115384 |
| gene:Sme2.5_06317.1_g00002.1 | 180.20  | 168.14  | 192.82  | 22.75  | 41.13  | 29.98  | 2.5279 | 4.26E-23   |
| gene:Sme2.5_08843.1_g00002.1 | 329.45  | 95.81   | 196.60  | 41.17  | 34.64  | 32.04  | 2.5285 | 2.01E-10   |
| gene:Sme2.5_15135.1_g00001.1 | 254.83  | 235.77  | 209.83  | 17.34  | 57.36  | 46.52  | 2.5296 | 2.97E-15   |
| gene:Sme2.5_13500.1_g00001.1 | 506.01  | 629.35  | 551.04  | 106.18 | 90.92  | 94.07  | 2.5342 | 3.09E-52   |
| novel.2795                   | 65.53   | 74.21   | 70.89   | 3.25   | 19.48  | 13.44  | 2.5402 | 7.71E-09   |
| gene:Sme2.5_07571.1_g00003.1 | 21.84   | 10.33   | 23.63   | 4.33   | 2.16   | 3.10   | 2.5402 | 0.00054312 |
| gene:Sme2.5_11987.1_g00001.1 | 67.35   | 79.84   | 88.85   | 11.92  | 15.15  | 13.44  | 2.5422 | 5.50E-13   |
| gene:Sme2.5_00594.1_g00014.1 | 317.62  | 356.95  | 272.21  | 43.34  | 77.93  | 41.35  | 2.5435 | 9.07E-24   |
| gene:Sme2.5_00264.1_g00022.1 | 96.47   | 49.78   | 96.41   | 16.25  | 14.07  | 11.37  | 2.5435 | 3.21E-10   |
| novel.1402                   | 20.02   | 11.27   | 24.57   | 2.17   | 3.25   | 4.13   | 2.5444 | 0.00045568 |
| gene:Sme2.5_00034.1_g00016.1 | 113.76  | 71.39   | 88.85   | 10.83  | 20.56  | 15.51  | 2.5470 | 2.19E-12   |
| novel.182                    | 1332.37 | 1242.73 | 1242.91 | 198.27 | 231.62 | 223.28 | 2.5471 | 7.36E-98   |
| gene:Sme2.5_08629.1_g00002.1 | 615.22  | 526.96  | 593.57  | 95.34  | 104.99 | 96.13  | 2.5500 | 3.96E-60   |
| novel.607                    | 137.42  | 100.51  | 82.23   | 15.17  | 25.98  | 13.44  | 2.5558 | 1.08E-12   |
| gene:Sme2.5_05106.1_g00005.1 | 30.94   | 23.48   | 20.79   | 0.00   | 8.66   | 4.13   | 2.5564 | 0.00026707 |
| gene:Sme2.5_05775.1_g00002.1 | 53.70   | 57.30   | 71.83   | 8.67   | 12.99  | 9.30   | 2.5629 | 1.85E-10   |
| gene:Sme2.5_01191.1_g00009.1 | 10.92   | 21.60   | 24.57   | 4.33   | 4.33   | 1.03   | 2.5659 | 0.00058598 |
| gene:Sme2.5_00061.1_g00016.1 | 57.34   | 48.85   | 45.37   | 9.75   | 3.25   | 12.40  | 2.5710 | 2.83E-08   |



|                              |         |         |         |        |         |         |        |            |
|------------------------------|---------|---------|---------|--------|---------|---------|--------|------------|
| gene:Sme2.5_06225.1_g00002.1 | 11.83   | 15.03   | 11.34   | 0.00   | 4.33    | 2.07    | 2.5782 | 0.00358537 |
| gene:Sme2.5_01540.1_g00001.1 | 3642.18 | 2852.75 | 3480.15 | 482.13 | 595.29  | 591.27  | 2.5795 | 1.34E-74   |
| gene:Sme2.5_05242.1_g00005.1 | 10.01   | 12.21   | 16.07   | 2.17   | 2.16    | 2.07    | 2.5805 | 0.00210159 |
| gene:Sme2.5_04467.1_g00005.1 | 40.04   | 42.27   | 38.75   | 2.17   | 8.66    | 9.30    | 2.5829 | 3.15E-07   |
| gene:Sme2.5_00396.1_g00020.1 | 7.28    | 31.00   | 18.90   | 3.25   | 0.00    | 6.20    | 2.5855 | 0.0033249  |
| gene:Sme2.5_01193.1_g00010.1 | 10.01   | 14.09   | 14.18   | 2.17   | 0.00    | 4.13    | 2.5883 | 0.00353967 |
| gene:Sme2.5_01060.1_g00011.1 | 75.54   | 39.45   | 51.98   | 11.92  | 6.49    | 9.30    | 2.5918 | 1.82E-08   |
| gene:Sme2.5_10309.1_g00001.1 | 148.34  | 138.08  | 159.74  | 15.17  | 41.13   | 17.57   | 2.5972 | 8.90E-15   |
| novel.3287                   | 101.93  | 122.11  | 112.48  | 14.08  | 20.56   | 20.67   | 2.6027 | 8.70E-18   |
| gene:Sme2.5_00690.1_g00005.1 | 156.54  | 145.60  | 150.28  | 20.59  | 19.48   | 34.11   | 2.6037 | 3.31E-21   |
| gene:Sme2.5_03087.1_g00001.1 | 20.93   | 18.79   | 25.52   | 3.25   | 5.41    | 2.07    | 2.6102 | 7.62E-05   |
| gene:Sme2.5_16188.1_g00001.1 | 563.35  | 414.24  | 585.07  | 40.09  | 130.96  | 84.76   | 2.6108 | 4.51E-16   |
| gene:Sme2.5_25065.1_g00002.1 | 10.92   | 5.64    | 9.45    | 1.08   | 1.08    | 2.07    | 2.6129 | 0.01118252 |
| gene:Sme2.5_02389.1_g00008.1 | 70.99   | 51.66   | 72.78   | 10.83  | 7.58    | 13.44   | 2.6138 | 8.36E-11   |
| gene:Sme2.5_01466.1_g00005.1 | 187.48  | 150.29  | 177.69  | 19.50  | 33.55   | 31.01   | 2.6151 | 1.03E-22   |
| gene:Sme2.5_00250.1_g00011.1 | 597.93  | 205.71  | 494.33  | 56.34  | 86.59   | 68.22   | 2.6202 | 3.05E-14   |
| gene:Sme2.5_00575.1_g00014.1 | 116.49  | 8.45    | 133.27  | 8.67   | 20.56   | 12.40   | 2.6329 | 0.01181473 |
| gene:Sme2.5_16188.1_g00002.1 | 93.74   | 79.84   | 80.34   | 4.33   | 29.22   | 7.24    | 2.6416 | 2.58E-07   |
| gene:Sme2.5_00917.1_g00010.1 | 20.02   | 15.03   | 11.34   | 3.25   | 0.00    | 4.13    | 2.6429 | 0.00144826 |
| gene:Sme2.5_00374.1_g00003.1 | 2113.23 | 1552.71 | 1996.22 | 218.86 | 395.06  | 289.43  | 2.6481 | 8.68E-37   |
| gene:Sme2.5_01414.1_g00001.1 | 220.24  | 277.10  | 242.91  | 30.34  | 35.72   | 51.68   | 2.6486 | 4.67E-28   |
| gene:Sme2.5_02393.1_g00004.1 | 12.74   | 5.64    | 8.51    | 1.08   | 1.08    | 2.07    | 2.6613 | 0.01001957 |
| gene:Sme2.5_02118.1_g00019.1 | 41.86   | 41.33   | 39.70   | 9.75   | 5.41    | 4.13    | 2.6765 | 5.35E-08   |
| gene:Sme2.5_00479.1_g00004.1 | 95.56   | 63.87   | 78.45   | 4.33   | 12.99   | 19.64   | 2.6798 | 4.91E-10   |
| gene:Sme2.5_00228.1_g00012.1 | 20.93   | 6.58    | 13.23   | 1.08   | 1.08    | 4.13    | 2.6811 | 0.00345827 |
| gene:Sme2.5_06254.1_g00003.1 | 31.85   | 21.60   | 29.30   | 2.17   | 7.58    | 3.10    | 2.6920 | 1.41E-05   |
| gene:Sme2.5_00351.1_g00018.1 | 6353.34 | 9151.90 | 7931.95 | 919.84 | 1520.70 | 1178.41 | 2.6952 | 2.39E-43   |
| gene:Sme2.5_01052.1_g00004.1 | 147.43  | 153.11  | 155.95  | 17.34  | 35.72   | 17.57   | 2.6953 | 7.94E-20   |
| gene:Sme2.5_30765.1_g00001.1 | 39.13   | 35.69   | 42.53   | 1.08   | 9.74    | 7.24    | 2.6970 | 7.24E-07   |
| gene:Sme2.5_02000.1_g00017.1 | 40.04   | 48.85   | 42.53   | 4.33   | 4.33    | 11.37   | 2.7034 | 5.41E-08   |

|                              |        |        |        |       |       |       |        |            |
|------------------------------|--------|--------|--------|-------|-------|-------|--------|------------|
| gene:Sme2.5_00225.1_g00010.1 | 12.74  | 8.45   | 6.62   | 1.08  | 0.00  | 3.10  | 2.7160 | 0.01062684 |
| gene:Sme2.5_29758.1_g00001.1 | 112.85 | 103.33 | 105.86 | 10.83 | 19.48 | 18.61 | 2.7167 | 9.33E-18   |
| novel.115                    | 81.91  | 50.72  | 57.66  | 5.42  | 17.32 | 6.20  | 2.7219 | 8.51E-09   |
| novel.2162                   | 17.29  | 15.97  | 16.07  | 0.00  | 4.33  | 3.10  | 2.7270 | 0.00061159 |
| gene:Sme2.5_01404.1_g00005.1 | 10.01  | 14.09  | 11.34  | 2.17  | 1.08  | 2.07  | 2.7338 | 0.00229145 |
| novel.1754                   | 29.12  | 12.21  | 22.68  | 3.25  | 2.16  | 4.13  | 2.7417 | 0.00013491 |
| gene:Sme2.5_02627.1_g00006.1 | 108.30 | 146.54 | 118.15 | 10.83 | 28.14 | 16.54 | 2.7491 | 6.19E-16   |
| gene:Sme2.5_00670.1_g00004.1 | 7.28   | 14.09  | 7.56   | 2.17  | 2.16  | 0.00  | 2.7542 | 0.00834158 |
| novel.2688                   | 9.10   | 9.39   | 10.40  | 1.08  | 2.16  | 1.03  | 2.7584 | 0.00536369 |
| novel.122                    | 28.21  | 6.58   | 16.07  | 0.00  | 3.25  | 4.13  | 2.7773 | 0.00236671 |
| gene:Sme2.5_04516.1_g00001.1 | 10.01  | 17.85  | 23.63  | 1.08  | 3.25  | 3.10  | 2.7872 | 0.00050221 |
| gene:Sme2.5_06926.1_g00002.1 | 79.18  | 48.85  | 41.59  | 7.58  | 11.91 | 5.17  | 2.7878 | 8.67E-09   |
| gene:Sme2.5_07287.1_g00002.1 | 39.13  | 13.15  | 35.92  | 3.25  | 4.33  | 5.17  | 2.7883 | 2.77E-05   |
| gene:Sme2.5_11987.1_g00002.1 | 48.23  | 70.45  | 58.60  | 6.50  | 5.41  | 13.44 | 2.7973 | 5.21E-10   |
| gene:Sme2.5_02820.1_g00003.1 | 12.74  | 10.33  | 6.62   | 0.00  | 3.25  | 1.03  | 2.7989 | 0.00754927 |
| gene:Sme2.5_09810.1_g00001.1 | 36.40  | 31.00  | 44.42  | 3.25  | 8.66  | 4.13  | 2.8042 | 2.44E-07   |
| gene:Sme2.5_01649.1_g00008.1 | 124.68 | 70.45  | 102.08 | 8.67  | 16.24 | 17.57 | 2.8043 | 2.15E-13   |
| gene:Sme2.5_01540.1_g00002.1 | 21.84  | 9.39   | 20.79  | 4.33  | 0.00  | 3.10  | 2.8043 | 0.0008682  |
| gene:Sme2.5_00013.1_g00010.1 | 375.87 | 305.28 | 362.00 | 33.59 | 68.19 | 47.55 | 2.8049 | 7.64E-32   |
| gene:Sme2.5_01832.1_g00005.1 | 74.63  | 78.90  | 55.77  | 2.17  | 18.40 | 9.30  | 2.8095 | 9.96E-09   |
| gene:Sme2.5_26073.1_g00001.1 | 27.30  | 28.18  | 27.41  | 4.33  | 3.25  | 4.13  | 2.8219 | 2.27E-06   |
| gene:Sme2.5_08035.1_g00004.1 | 33.67  | 45.09  | 42.53  | 5.42  | 10.82 | 1.03  | 2.8222 | 7.13E-07   |
| gene:Sme2.5_13146.1_g00002.1 | 113.76 | 100.51 | 110.59 | 16.25 | 18.40 | 11.37 | 2.8234 | 7.94E-19   |
| gene:Sme2.5_04224.1_g00005.1 | 60.98  | 15.03  | 37.81  | 1.08  | 10.82 | 4.13  | 2.8295 | 9.29E-05   |
| novel.2800                   | 97.38  | 139.96 | 96.41  | 14.08 | 16.24 | 16.54 | 2.8313 | 3.68E-17   |
| gene:Sme2.5_09719.1_g00002.1 | 25.48  | 19.73  | 23.63  | 1.08  | 6.49  | 2.07  | 2.8408 | 4.70E-05   |
| gene:Sme2.5_18939.1_g00002.1 | 290.32 | 117.42 | 206.99 | 15.17 | 38.96 | 31.01 | 2.8516 | 2.11E-13   |
| gene:Sme2.5_02126.1_g00006.1 | 43.68  | 32.88  | 54.82  | 5.42  | 7.58  | 5.17  | 2.8567 | 1.86E-08   |
| gene:Sme2.5_08011.1_g00001.1 | 27.30  | 12.21  | 22.68  | 2.17  | 4.33  | 2.07  | 2.8654 | 0.00011377 |
| gene:Sme2.5_00473.1_g00003.1 | 33.67  | 25.36  | 34.97  | 1.08  | 9.74  | 2.07  | 2.8730 | 1.23E-05   |

|                              |         |         |         |        |        |        |        |            |
|------------------------------|---------|---------|---------|--------|--------|--------|--------|------------|
| gene:Sme2.5_30335.1_g00001.1 | 13.65   | 29.12   | 19.85   | 1.08   | 2.16   | 5.17   | 2.8821 | 0.00014035 |
| gene:Sme2.5_07693.1_g00001.1 | 50.97   | 69.51   | 52.93   | 8.67   | 8.66   | 6.20   | 2.8846 | 4.67E-11   |
| gene:Sme2.5_03706.1_g00009.1 | 350.38  | 321.25  | 318.53  | 53.09  | 42.21  | 38.25  | 2.8924 | 1.21E-46   |
| gene:Sme2.5_03392.1_g00002.1 | 15.47   | 15.03   | 17.01   | 4.33   | 0.00   | 2.07   | 2.8926 | 0.00055147 |
| gene:Sme2.5_00676.1_g00012.1 | 49.14   | 50.72   | 59.55   | 6.50   | 3.25   | 11.37  | 2.9069 | 7.16E-10   |
| gene:Sme2.5_02025.1_g00002.1 | 31.85   | 21.60   | 18.90   | 3.25   | 6.49   | 0.00   | 2.9071 | 8.04E-05   |
| novel.2433                   | 6.37    | 14.09   | 19.85   | 1.08   | 3.25   | 1.03   | 2.9140 | 0.00203289 |
| gene:Sme2.5_26720.1_g00001.1 | 660.73  | 485.63  | 586.01  | 28.17  | 120.14 | 80.63  | 2.9196 | 1.82E-07   |
| novel.1399                   | 6.37    | 10.33   | 7.56    | 1.08   | 1.08   | 1.03   | 2.9227 | 0.00912983 |
| gene:Sme2.5_25056.1_g00002.1 | 6.37    | 6.58    | 93.57   | 2.17   | 9.74   | 2.07   | 2.9326 | 0.00429223 |
| gene:Sme2.5_00179.1_g00016.1 | 26.39   | 24.42   | 14.18   | 0.00   | 4.33   | 4.13   | 2.9346 | 0.00011322 |
| gene:Sme2.5_01368.1_g00001.1 | 25.48   | 20.67   | 18.90   | 1.08   | 3.25   | 4.13   | 2.9351 | 3.29E-05   |
| gene:Sme2.5_00297.1_g00011.1 | 10.92   | 15.03   | 15.12   | 0.00   | 1.08   | 4.13   | 2.9552 | 0.00141841 |
| gene:Sme2.5_00075.1_g00004.1 | 28.21   | 24.42   | 31.19   | 3.25   | 6.49   | 1.03   | 2.9702 | 4.18E-06   |
| gene:Sme2.5_00368.1_g00010.1 | 129.23  | 119.30  | 137.05  | 17.34  | 14.07  | 17.57  | 2.9756 | 3.24E-23   |
| gene:Sme2.5_15882.1_g00002.1 | 3.64    | 9.39    | 12.29   | 1.08   | 2.16   | 0.00   | 2.9759 | 0.01246659 |
| gene:Sme2.5_04427.1_g00003.1 | 4.55    | 6.58    | 14.18   | 2.17   | 0.00   | 1.03   | 2.9820 | 0.01242336 |
| novel.660                    | 585.19  | 541.99  | 578.45  | 54.17  | 71.43  | 88.90  | 2.9886 | 2.40E-59   |
| gene:Sme2.5_02154.1_g00006.1 | 859.12  | 572.99  | 695.65  | 47.67  | 140.71 | 79.59  | 2.9896 | 2.05E-22   |
| gene:Sme2.5_05467.1_g00005.1 | 20.93   | 12.21   | 9.45    | 1.08   | 4.33   | 0.00   | 2.9918 | 0.00176406 |
| gene:Sme2.5_00100.1_g00008.1 | 19.11   | 7.51    | 16.07   | 0.00   | 5.41   | 0.00   | 2.9927 | 0.00434009 |
| gene:Sme2.5_04886.1_g00004.1 | 1271.40 | 1169.47 | 1240.08 | 102.93 | 204.56 | 154.02 | 2.9956 | 4.44E-48   |
| gene:Sme2.5_00133.1_g00008.1 | 41.86   | 46.03   | 72.78   | 5.42   | 2.16   | 12.40  | 2.9957 | 2.91E-08   |
| gene:Sme2.5_01011.1_g00004.1 | 84.64   | 60.12   | 73.72   | 3.25   | 14.07  | 9.30   | 3.0362 | 5.29E-12   |
| gene:Sme2.5_25505.1_g00001.1 | 219.33  | 179.41  | 189.98  | 14.08  | 40.05  | 17.57  | 3.0403 | 7.11E-21   |
| gene:Sme2.5_00754.1_g00016.1 | 228.43  | 288.37  | 257.09  | 21.67  | 35.72  | 36.18  | 3.0457 | 3.59E-35   |
| gene:Sme2.5_01082.1_g00009.1 | 20.93   | 21.60   | 10.40   | 0.00   | 4.33   | 2.07   | 3.0496 | 0.00039022 |
| gene:Sme2.5_16024.1_g00001.1 | 110.12  | 158.75  | 137.05  | 4.33   | 27.06  | 17.57  | 3.0503 | 1.42E-13   |
| gene:Sme2.5_00288.1_g00001.1 | 55.52   | 42.27   | 34.97   | 5.42   | 2.16   | 8.27   | 3.0585 | 1.52E-08   |
| gene:Sme2.5_12681.1_g00002.1 | 33.67   | 45.09   | 37.81   | 3.25   | 7.58   | 3.10   | 3.0699 | 3.09E-08   |

|                              |        |        |        |       |       |       |        |            |
|------------------------------|--------|--------|--------|-------|-------|-------|--------|------------|
| gene:Sme2.5_27834.1_g00001.1 | 9.10   | 9.39   | 8.51   | 1.08  | 2.16  | 0.00  | 3.0720 | 0.00585634 |
| gene:Sme2.5_00135.1_g00019.1 | 120.13 | 72.33  | 103.97 | 15.17 | 11.91 | 8.27  | 3.0728 | 1.41E-15   |
| gene:Sme2.5_14217.1_g00002.1 | 456.87 | 275.22 | 379.96 | 24.92 | 56.28 | 50.65 | 3.0752 | 3.98E-26   |
| gene:Sme2.5_00572.1_g00011.1 | 28.21  | 28.18  | 24.57  | 2.17  | 5.41  | 2.07  | 3.0752 | 2.31E-06   |
| gene:Sme2.5_17006.1_g00001.1 | 121.95 | 89.24  | 113.42 | 6.50  | 24.89 | 7.24  | 3.0757 | 7.30E-13   |
| gene:Sme2.5_07465.1_g00001.1 | 16.38  | 16.91  | 11.34  | 0.00  | 1.08  | 4.13  | 3.0758 | 0.00075867 |
| gene:Sme2.5_00140.1_g00013.1 | 135.60 | 59.18  | 78.45  | 20.59 | 3.25  | 8.27  | 3.0921 | 4.23E-09   |
| gene:Sme2.5_01461.1_g00004.1 | 14.56  | 16.91  | 14.18  | 2.17  | 2.16  | 1.03  | 3.0959 | 0.00028137 |
| gene:Sme2.5_00547.1_g00008.1 | 25.48  | 27.24  | 31.19  | 0.00  | 7.58  | 2.07  | 3.1258 | 1.11E-05   |
| novel.1621                   | 0.91   | 25.36  | 11.34  | 1.08  | 3.25  | 0.00  | 3.1284 | 0.01375641 |
| gene:Sme2.5_10665.1_g00001.1 | 12.74  | 10.33  | 14.18  | 0.00  | 2.16  | 2.07  | 3.1299 | 0.00123941 |
| gene:Sme2.5_00162.1_g00011.1 | 321.26 | 575.81 | 469.75 | 35.75 | 83.34 | 34.11 | 3.1589 | 8.87E-22   |
| gene:Sme2.5_04721.1_g00003.1 | 10.01  | 10.33  | 8.51   | 2.17  | 1.08  | 0.00  | 3.1678 | 0.00407129 |
| gene:Sme2.5_09989.1_g00001.1 | 22.75  | 34.76  | 28.36  | 0.00  | 2.16  | 7.24  | 3.1719 | 9.87E-06   |
| gene:Sme2.5_01734.1_g00011.1 | 61.89  | 49.78  | 41.59  | 0.00  | 6.49  | 10.34 | 3.1760 | 2.96E-08   |
| gene:Sme2.5_02376.1_g00009.1 | 40.95  | 23.48  | 22.68  | 4.33  | 3.25  | 2.07  | 3.1817 | 1.99E-06   |
| gene:Sme2.5_01765.1_g00003.1 | 238.44 | 422.70 | 305.29 | 22.75 | 42.21 | 41.35 | 3.1826 | 2.68E-27   |
| gene:Sme2.5_00250.1_g00015.1 | 47.32  | 7.51   | 34.03  | 6.50  | 2.16  | 1.03  | 3.2043 | 0.00014449 |
| gene:Sme2.5_09310.1_g00002.1 | 238.44 | 209.47 | 236.29 | 19.50 | 32.47 | 21.71 | 3.2168 | 1.34E-36   |
| gene:Sme2.5_01801.1_g00011.1 | 8.19   | 7.51   | 14.18  | 0.00  | 0.00  | 3.10  | 3.2369 | 0.00579695 |
| gene:Sme2.5_04310.1_g00005.1 | 84.64  | 57.30  | 80.34  | 6.50  | 11.91 | 5.17  | 3.2424 | 1.52E-13   |
| gene:Sme2.5_32688.1_g00001.1 | 86.46  | 74.21  | 73.72  | 0.00  | 20.56 | 4.13  | 3.2475 | 0.00987294 |
| gene:Sme2.5_01371.1_g00009.1 | 307.61 | 208.53 | 285.44 | 23.84 | 32.47 | 27.91 | 3.2509 | 4.14E-35   |
| novel.3155                   | 14.56  | 4.70   | 21.74  | 2.17  | 1.08  | 1.03  | 3.2631 | 0.00150652 |
| gene:Sme2.5_00690.1_g00017.1 | 9.10   | 9.39   | 12.29  | 1.08  | 1.08  | 1.03  | 3.2661 | 0.00232882 |
| gene:Sme2.5_00208.1_g00016.1 | 357.67 | 239.53 | 329.87 | 9.75  | 56.28 | 29.98 | 3.2715 | 4.27E-07   |
| gene:Sme2.5_31452.1_g00001.1 | 31.85  | 34.76  | 36.86  | 0.00  | 3.25  | 7.24  | 3.2862 | 3.46E-07   |
| gene:Sme2.5_07712.1_g00004.1 | 20.93  | 4.70   | 5.67   | 0.00  | 2.16  | 1.03  | 3.2933 | 0.00670852 |
| gene:Sme2.5_03307.1_g00006.1 | 21.84  | 12.21  | 7.56   | 1.08  | 0.00  | 3.10  | 3.2970 | 0.00124229 |
| gene:Sme2.5_06317.1_g00003.1 | 13.65  | 19.73  | 8.51   | 2.17  | 0.00  | 2.07  | 3.2991 | 0.00077781 |

|                              |         |        |         |       |        |        |        |            |
|------------------------------|---------|--------|---------|-------|--------|--------|--------|------------|
| gene:Sme2.5_02490.1_g00003.1 | 240.26  | 166.26 | 223.06  | 20.59 | 22.73  | 20.67  | 3.2992 | 7.68E-32   |
| gene:Sme2.5_10888.1_g00002.1 | 14.56   | 6.58   | 10.40   | 1.08  | 0.00   | 2.07   | 3.3084 | 0.00299684 |
| gene:Sme2.5_00010.1_g00006.1 | 7.28    | 6.58   | 17.96   | 2.17  | 0.00   | 1.03   | 3.3129 | 0.00385896 |
| novel.2227                   | 20.02   | 27.24  | 16.07   | 1.08  | 1.08   | 4.13   | 3.3135 | 3.11E-05   |
| gene:Sme2.5_03583.1_g00009.1 | 225.70  | 113.66 | 180.53  | 3.25  | 31.39  | 17.57  | 3.3158 | 2.80E-05   |
| gene:Sme2.5_01087.1_g00008.1 | 23.66   | 17.85  | 33.08   | 2.17  | 4.33   | 1.03   | 3.3174 | 7.46E-06   |
| gene:Sme2.5_16123.1_g00001.1 | 30.03   | 23.48  | 20.79   | 0.00  | 4.33   | 3.10   | 3.3183 | 7.40E-06   |
| gene:Sme2.5_00989.1_g00007.1 | 29.12   | 14.09  | 20.79   | 2.17  | 3.25   | 1.03   | 3.3209 | 2.98E-05   |
| gene:Sme2.5_14318.1_g00001.1 | 177.47  | 128.69 | 141.78  | 9.75  | 21.65  | 13.44  | 3.3223 | 1.56E-23   |
| gene:Sme2.5_00041.1_g00028.1 | 23.66   | 31.00  | 9.45    | 3.25  | 1.08   | 2.07   | 3.3256 | 7.66E-05   |
| gene:Sme2.5_00122.1_g00018.1 | 4.55    | 10.33  | 6.62    | 1.08  | 1.08   | 0.00   | 3.3274 | 0.01245348 |
| gene:Sme2.5_01709.1_g00004.1 | 1355.12 | 967.51 | 1208.89 | 34.67 | 206.73 | 103.37 | 3.3566 | 8.05E-07   |
| gene:Sme2.5_02899.1_g00001.1 | 228.43  | 225.44 | 210.78  | 5.42  | 29.22  | 29.98  | 3.3588 | 1.78E-20   |
| gene:Sme2.5_15241.1_g00002.1 | 12.74   | 21.60  | 21.74   | 1.08  | 4.33   | 0.00   | 3.3880 | 0.00012864 |
| gene:Sme2.5_02376.1_g00005.1 | 10.92   | 13.15  | 20.79   | 1.08  | 2.16   | 1.03   | 3.3928 | 0.00031756 |
| gene:Sme2.5_00114.1_g00012.1 | 435.02  | 123.99 | 24.57   | 21.67 | 17.32  | 16.54  | 3.3940 | 0.0011051  |
| gene:Sme2.5_00077.1_g00005.1 | 40.04   | 33.82  | 39.70   | 4.33  | 1.08   | 5.17   | 3.4158 | 1.16E-08   |
| gene:Sme2.5_05769.1_g00003.1 | 111.94  | 111.78 | 118.15  | 2.17  | 20.56  | 9.30   | 3.4171 | 3.01E-15   |
| gene:Sme2.5_25273.1_g00001.1 | 40.04   | 207.59 | 53.88   | 4.33  | 17.32  | 6.20   | 3.4382 | 2.02E-07   |
| gene:Sme2.5_00909.1_g00010.1 | 2.73    | 12.21  | 8.51    | 1.08  | 1.08   | 0.00   | 3.4513 | 0.01131483 |
| novel.1773                   | 31.85   | 22.54  | 27.41   | 1.08  | 4.33   | 2.07   | 3.4543 | 1.15E-06   |
| gene:Sme2.5_01022.1_g00005.1 | 43.68   | 34.76  | 39.70   | 1.08  | 5.41   | 4.13   | 3.4715 | 5.90E-09   |
| gene:Sme2.5_08494.1_g00003.1 | 19.11   | 23.48  | 4.73    | 0.00  | 0.00   | 4.13   | 3.4904 | 0.00191256 |
| gene:Sme2.5_00620.1_g00006.1 | 4.55    | 11.27  | 8.51    | 2.17  | 0.00   | 0.00   | 3.5051 | 0.0093146  |
| novel.2630                   | 34.58   | 16.91  | 34.97   | 1.08  | 3.25   | 3.10   | 3.5365 | 1.48E-06   |
| gene:Sme2.5_13284.1_g00001.1 | 20.93   | 13.15  | 16.07   | 0.00  | 2.16   | 2.07   | 3.5593 | 0.00012399 |
| gene:Sme2.5_01418.1_g00004.1 | 388.61  | 250.80 | 376.18  | 11.92 | 35.72  | 38.25  | 3.5609 | 1.64E-27   |
| gene:Sme2.5_02334.1_g00007.1 | 121.95  | 58.24  | 75.61   | 11.92 | 3.25   | 6.20   | 3.5842 | 6.06E-13   |
| gene:Sme2.5_02078.1_g00006.1 | 67.35   | 62.94  | 62.38   | 1.08  | 8.66   | 6.20   | 3.5921 | 3.25E-13   |
| gene:Sme2.5_00333.1_g00010.1 | 13.65   | 6.58   | 18.90   | 0.00  | 2.16   | 1.03   | 3.6129 | 0.00100127 |

|                              |         |         |         |        |        |        |        |            |
|------------------------------|---------|---------|---------|--------|--------|--------|--------|------------|
| gene:Sme2.5_03164.1_g00002.1 | 22.75   | 14.09   | 16.07   | 2.17   | 0.00   | 2.07   | 3.6364 | 7.97E-05   |
| gene:Sme2.5_08914.1_g00002.1 | 22.75   | 1.88    | 15.12   | 2.17   | 0.00   | 1.03   | 3.6366 | 0.00326861 |
| gene:Sme2.5_05093.1_g00003.1 | 13.65   | 11.27   | 15.12   | 1.08   | 1.08   | 1.03   | 3.6463 | 0.00040113 |
| gene:Sme2.5_00011.1_g00030.1 | 14.56   | 4.70    | 7.56    | 1.08   | 1.08   | 0.00   | 3.6496 | 0.00544739 |
| gene:Sme2.5_00026.1_g00024.1 | 225.70  | 18.79   | 159.74  | 14.08  | 3.25   | 14.47  | 3.6671 | 0.00059839 |
| gene:Sme2.5_05592.1_g00002.1 | 16.38   | 37.57   | 41.59   | 1.08   | 6.49   | 0.00   | 3.6694 | 6.17E-06   |
| gene:Sme2.5_01674.1_g00004.1 | 9.10    | 19.73   | 12.29   | 1.08   | 2.16   | 0.00   | 3.6783 | 0.00058127 |
| gene:Sme2.5_11356.1_g00001.1 | 10.92   | 4.70    | 12.29   | 1.08   | 0.00   | 1.03   | 3.7128 | 0.00408941 |
| gene:Sme2.5_00398.1_g00033.1 | 131.96  | 86.42   | 81.29   | 6.50   | 7.58   | 8.27   | 3.7442 | 3.43E-18   |
| gene:Sme2.5_01725.1_g00001.1 | 12.74   | 13.15   | 17.01   | 1.08   | 0.00   | 2.07   | 3.7496 | 0.00029538 |
| gene:Sme2.5_00225.1_g00009.1 | 364.95  | 227.32  | 272.21  | 14.08  | 31.39  | 16.54  | 3.8038 | 1.73E-33   |
| novel.2730                   | 49.14   | 22.54   | 50.09   | 4.33   | 4.33   | 0.00   | 3.8293 | 6.18E-08   |
| gene:Sme2.5_02187.1_g00010.1 | 10.92   | 174.72  | 26.47   | 6.50   | 3.25   | 5.17   | 3.8295 | 0.00124098 |
| gene:Sme2.5_01562.1_g00004.1 | 18.20   | 15.03   | 12.29   | 2.17   | 0.00   | 1.03   | 3.8318 | 0.0001969  |
| gene:Sme2.5_05435.1_g00007.1 | 84.64   | 36.63   | 61.44   | 3.25   | 3.25   | 6.20   | 3.8402 | 3.05E-11   |
| novel.683                    | 171.10  | 81.72   | 99.24   | 4.33   | 9.74   | 10.34  | 3.8470 | 3.56E-17   |
| novel.923                    | 7.28    | 7.51    | 16.07   | 0.00   | 1.08   | 1.03   | 3.8566 | 0.00246158 |
| gene:Sme2.5_01690.1_g00008.1 | 8.19    | 15.03   | 7.56    | 0.00   | 0.00   | 2.07   | 3.8607 | 0.00279011 |
| gene:Sme2.5_00531.1_g00003.1 | 21.84   | 26.30   | 29.30   | 0.00   | 0.00   | 5.17   | 3.8717 | 5.66E-06   |
| gene:Sme2.5_00021.1_g00010.1 | 38.22   | 16.91   | 22.68   | 1.08   | 0.00   | 4.13   | 3.8770 | 6.67E-06   |
| gene:Sme2.5_28695.1_g00001.1 | 23.66   | 21.60   | 18.90   | 1.08   | 1.08   | 2.07   | 3.9139 | 7.50E-06   |
| novel.747                    | 19.11   | 19.73   | 9.45    | 0.00   | 1.08   | 2.07   | 3.9217 | 0.00017621 |
| gene:Sme2.5_25319.1_g00001.1 | 130.14  | 125.87  | 103.02  | 3.25   | 11.91  | 8.27   | 3.9370 | 8.86E-23   |
| gene:Sme2.5_00563.1_g00012.1 | 9.10    | 3.76    | 4.73    | 1.08   | 0.00   | 0.00   | 3.9414 | 0.0106343  |
| gene:Sme2.5_02132.1_g00003.1 | 9.10    | 2.82    | 5.67    | 0.00   | 1.08   | 0.00   | 3.9417 | 0.01135771 |
| gene:Sme2.5_10114.1_g00002.1 | 5.46    | 4.70    | 7.56    | 0.00   | 1.08   | 0.00   | 3.9502 | 0.00914395 |
| gene:Sme2.5_02701.1_g00019.1 | 4.55    | 8.45    | 4.73    | 0.00   | 1.08   | 0.00   | 3.9509 | 0.00962745 |
| gene:Sme2.5_04404.1_g00006.1 | 6.37    | 8.45    | 17.96   | 0.00   | 0.00   | 2.07   | 3.9512 | 0.00251013 |
| gene:Sme2.5_23335.1_g00001.1 | 58.25   | 52.60   | 38.75   | 3.25   | 1.08   | 5.17   | 3.9664 | 6.01E-11   |
| gene:Sme2.5_04224.1_g00009.1 | 4021.69 | 3463.31 | 3655.96 | 127.85 | 366.92 | 207.77 | 3.9872 | 5.89E-20   |

|                              |        |        |        |       |       |      |        |            |
|------------------------------|--------|--------|--------|-------|-------|------|--------|------------|
| gene:Sme2.5_01189.1_g00012.1 | 9.10   | 7.51   | 1.89   | 0.00  | 0.00  | 1.03 | 4.0149 | 0.01095195 |
| gene:Sme2.5_00468.1_g00001.1 | 9.10   | 2.82   | 6.62   | 0.00  | 1.08  | 0.00 | 4.0169 | 0.00925031 |
| novel.2190                   | 9.10   | 69.51  | 59.55  | 0.00  | 3.25  | 5.17 | 4.0264 | 3.47E-06   |
| gene:Sme2.5_02425.1_g00006.1 | 13.65  | 14.09  | 7.56   | 0.00  | 0.00  | 2.07 | 4.0584 | 0.00124534 |
| gene:Sme2.5_01365.1_g00005.1 | 20.02  | 3.76   | 12.29  | 0.00  | 2.16  | 0.00 | 4.0761 | 0.00232088 |
| gene:Sme2.5_09255.1_g00001.1 | 5.46   | 9.39   | 4.73   | 0.00  | 0.00  | 1.03 | 4.0943 | 0.00645021 |
| gene:Sme2.5_00089.1_g00022.1 | 177.47 | 85.48  | 138.94 | 8.67  | 9.74  | 5.17 | 4.0969 | 1.47E-20   |
| gene:Sme2.5_19482.1_g00001.1 | 4.55   | 2.82   | 12.29  | 0.00  | 0.00  | 1.03 | 4.0990 | 0.00893333 |
| gene:Sme2.5_00089.1_g00023.1 | 69.17  | 102.39 | 86.96  | 5.42  | 5.41  | 4.13 | 4.1133 | 1.09E-17   |
| gene:Sme2.5_00417.1_g00002.1 | 102.84 | 105.21 | 113.42 | 0.00  | 9.74  | 8.27 | 4.1509 | 4.22E-20   |
| gene:Sme2.5_09100.1_g00003.1 | 12.74  | 10.33  | 15.12  | 0.00  | 2.16  | 0.00 | 4.1594 | 0.00069122 |
| gene:Sme2.5_15164.1_g00002.1 | 4.55   | 4.70   | 11.34  | 0.00  | 1.08  | 0.00 | 4.1659 | 0.00594583 |
| gene:Sme2.5_00700.1_g00003.1 | 46.41  | 30.06  | 39.70  | 0.00  | 1.08  | 5.17 | 4.1903 | 1.45E-08   |
| gene:Sme2.5_10721.1_g00003.1 | 20.02  | 7.51   | 11.34  | 0.00  | 0.00  | 2.07 | 4.1988 | 0.00091459 |
| gene:Sme2.5_01801.1_g00006.1 | 7.28   | 16.91  | 15.12  | 0.00  | 2.16  | 0.00 | 4.1993 | 0.00078562 |
| gene:Sme2.5_04467.1_g00007.1 | 14.56  | 15.03  | 10.40  | 1.08  | 0.00  | 1.03 | 4.2312 | 0.00043491 |
| gene:Sme2.5_00826.1_g00004.1 | 17.29  | 19.73  | 2.84   | 0.00  | 0.00  | 2.07 | 4.2368 | 0.00178623 |
| novel.633                    | 59.16  | 111.78 | 70.89  | 2.17  | 4.33  | 6.20 | 4.2429 | 6.57E-15   |
| gene:Sme2.5_05184.1_g00005.1 | 29.12  | 31.00  | 44.42  | 0.00  | 3.25  | 2.07 | 4.2940 | 3.65E-08   |
| gene:Sme2.5_07504.1_g00002.1 | 276.67 | 237.65 | 256.14 | 13.00 | 16.24 | 9.30 | 4.3264 | 1.89E-47   |
| gene:Sme2.5_12534.1_g00003.1 | 8.19   | 18.79  | 16.07  | 0.00  | 0.00  | 2.07 | 4.3421 | 0.00044441 |
| gene:Sme2.5_06014.1_g00002.1 | 7.28   | 2.82   | 13.23  | 0.00  | 0.00  | 1.03 | 4.3471 | 0.00429042 |
| gene:Sme2.5_00046.1_g00002.1 | 4.55   | 2.82   | 4.73   | 0.00  | 0.00  | 0.00 | 4.3617 | 0.0111387  |
| gene:Sme2.5_00157.1_g00021.1 | 109.21 | 44.15  | 70.89  | 1.08  | 5.41  | 4.13 | 4.3967 | 7.33E-13   |
| gene:Sme2.5_11974.1_g00002.1 | 5.46   | 4.70   | 2.84   | 0.00  | 0.00  | 0.00 | 4.4657 | 0.00833351 |
| gene:Sme2.5_00089.1_g00019.1 | 5.46   | 1.88   | 5.67   | 0.00  | 0.00  | 0.00 | 4.4673 | 0.00976139 |
| gene:Sme2.5_02678.1_g00008.1 | 4.55   | 4.70   | 3.78   | 0.00  | 0.00  | 0.00 | 4.4689 | 0.00761323 |
| gene:Sme2.5_02228.1_g00002.1 | 4.55   | 0.94   | 7.56   | 0.00  | 0.00  | 0.00 | 4.4711 | 0.01365564 |
| gene:Sme2.5_00250.1_g00013.1 | 2.73   | 1.88   | 8.51   | 0.00  | 0.00  | 0.00 | 4.4771 | 0.01177008 |
| gene:Sme2.5_13019.1_g00001.1 | 117.40 | 73.27  | 99.24  | 6.50  | 4.33  | 2.07 | 4.5004 | 1.74E-18   |

|                              |        |        |        |       |      |       |        |            |
|------------------------------|--------|--------|--------|-------|------|-------|--------|------------|
| gene:Sme2.5_10854.1_g00003.1 | 10.01  | 5.64   | 10.40  | 0.00  | 0.00 | 1.03  | 4.5066 | 0.0016804  |
| gene:Sme2.5_00235.1_g00010.1 | 87.37  | 71.39  | 110.59 | 1.08  | 5.41 | 5.17  | 4.5230 | 1.81E-17   |
| gene:Sme2.5_10589.1_g00002.1 | 12.74  | 7.51   | 6.62   | 0.00  | 0.00 | 1.03  | 4.5528 | 0.0014762  |
| gene:Sme2.5_06686.1_g00003.1 | 6.37   | 5.64   | 1.89   | 0.00  | 0.00 | 0.00  | 4.5631 | 0.00756043 |
| gene:Sme2.5_13789.1_g00003.1 | 5.46   | 3.76   | 4.73   | 0.00  | 0.00 | 0.00  | 4.5672 | 0.00564379 |
| gene:Sme2.5_11592.1_g00002.1 | 4.55   | 4.70   | 4.73   | 0.00  | 0.00 | 0.00  | 4.5697 | 0.00541406 |
| gene:Sme2.5_00755.1_g00004.1 | 74.63  | 115.54 | 115.31 | 2.17  | 7.58 | 3.10  | 4.5760 | 7.58E-19   |
| gene:Sme2.5_00690.1_g00008.1 | 18.20  | 4.70   | 4.73   | 0.00  | 1.08 | 0.00  | 4.5936 | 0.00232456 |
| gene:Sme2.5_06822.1_g00001.1 | 10.92  | 5.64   | 11.34  | 0.00  | 1.08 | 0.00  | 4.6059 | 0.00123699 |
| gene:Sme2.5_06413.1_g00001.1 | 10.92  | 6.58   | 11.34  | 1.08  | 0.00 | 0.00  | 4.6536 | 0.00097295 |
| gene:Sme2.5_00861.1_g00003.1 | 3.64   | 7.51   | 5.67   | 0.00  | 0.00 | 0.00  | 4.8368 | 0.0024369  |
| gene:Sme2.5_02782.1_g00005.1 | 2.73   | 6.58   | 7.56   | 0.00  | 0.00 | 0.00  | 4.8398 | 0.00278289 |
| gene:Sme2.5_08551.1_g00002.1 | 40.95  | 28.18  | 26.47  | 2.17  | 0.00 | 1.03  | 4.9025 | 2.34E-07   |
| gene:Sme2.5_05755.1_g00005.1 | 6.37   | 5.64   | 5.67   | 0.00  | 0.00 | 0.00  | 4.9093 | 0.00160881 |
| gene:Sme2.5_19548.1_g00001.1 | 6.37   | 4.70   | 6.62   | 0.00  | 0.00 | 0.00  | 4.9097 | 0.00166656 |
| gene:Sme2.5_02363.1_g00008.1 | 5.46   | 5.64   | 6.62   | 0.00  | 0.00 | 0.00  | 4.9116 | 0.0016051  |
| gene:Sme2.5_08629.1_g00003.1 | 244.81 | 182.23 | 189.98 | 8.67  | 5.41 | 6.20  | 4.9291 | 8.03E-36   |
| gene:Sme2.5_10589.1_g00003.1 | 27.30  | 19.73  | 18.90  | 2.17  | 0.00 | 0.00  | 4.9489 | 1.72E-05   |
| gene:Sme2.5_00323.1_g00002.1 | 6.37   | 19.73  | 9.45   | 0.00  | 0.00 | 1.03  | 4.9541 | 0.00047206 |
| novel.485                    | 566.99 | 501.60 | 530.25 | 21.67 | 9.74 | 19.64 | 4.9664 | 2.48E-83   |
| gene:Sme2.5_00235.1_g00011.1 | 9.10   | 2.82   | 6.62   | 0.00  | 0.00 | 0.00  | 4.9785 | 0.00182145 |
| gene:Sme2.5_01734.1_g00010.1 | 10.92  | 13.15  | 12.29  | 0.00  | 1.08 | 0.00  | 4.9873 | 0.00024065 |
| gene:Sme2.5_02326.1_g00002.1 | 12.74  | 6.58   | 17.96  | 1.08  | 0.00 | 0.00  | 5.0234 | 0.00031201 |
| gene:Sme2.5_10963.1_g00002.1 | 20.93  | 7.51   | 9.45   | 0.00  | 1.08 | 0.00  | 5.0492 | 0.00031812 |
| gene:Sme2.5_00170.1_g00010.1 | 15.47  | 9.39   | 13.23  | 1.08  | 0.00 | 0.00  | 5.0556 | 0.00020253 |
| gene:Sme2.5_11530.1_g00004.1 | 10.92  | 3.76   | 6.62   | 0.00  | 0.00 | 0.00  | 5.1790 | 0.00081198 |
| novel.1917                   | 12.74  | 16.91  | 12.29  | 0.00  | 0.00 | 1.03  | 5.1933 | 0.00010813 |
| gene:Sme2.5_25152.1_g00001.1 | 172.01 | 14.09  | 218.34 | 3.25  | 6.49 | 1.03  | 5.2336 | 1.73E-05   |
| gene:Sme2.5_04329.1_g00002.1 | 6.37   | 8.45   | 7.56   | 0.00  | 0.00 | 0.00  | 5.2493 | 0.00041302 |
| novel.1096                   | 18.20  | 7.51   | 18.90  | 0.00  | 0.00 | 1.03  | 5.2834 | 0.00011155 |



|                              |        |        |        |        |        |        |          |            |
|------------------------------|--------|--------|--------|--------|--------|--------|----------|------------|
| novel. 2966                  | 203.86 | 195.38 | 224.95 | 6.50   | 3.25   | 5.17   | 5.3863   | 6.34E-36   |
| gene:Sme2.5_01150.1_g00009.1 | 13.65  | 5.64   | 7.56   | 0.00   | 0.00   | 0.00   | 5.5134   | 0.00018525 |
| gene:Sme2.5_00230.1_g00010.1 | 9.10   | 5.64   | 14.18  | 0.00   | 0.00   | 0.00   | 5.6185   | 0.00011495 |
| gene:Sme2.5_14278.1_g00001.1 | 7.28   | 13.15  | 15.12  | 0.00   | 0.00   | 0.00   | 5.9160   | 2.45E-05   |
| gene:Sme2.5_07374.1_g00004.1 | 17.29  | 7.51   | 14.18  | 0.00   | 0.00   | 0.00   | 6.0508   | 1.38E-05   |
| gene:Sme2.5_09100.1_g00004.1 | 39.13  | 52.60  | 57.66  | 1.08   | 0.00   | 1.03   | 6.1307   | 1.60E-08   |
| gene:Sme2.5_02030.1_g00004.1 | 24.57  | 83.60  | 49.15  | 0.00   | 0.00   | 2.07   | 6.2096   | 6.03E-08   |
| novel. 2512                  | 9.10   | 18.79  | 16.07  | 0.00   | 0.00   | 0.00   | 6.2221   | 5.21E-06   |
| novel. 2183                  | 18.20  | 10.33  | 16.07  | 0.00   | 0.00   | 0.00   | 6.2448   | 3.98E-06   |
| gene:Sme2.5_11845.1_g00003.1 | 18.20  | 41.33  | 30.25  | 0.00   | 1.08   | 0.00   | 6.2908   | 1.02E-06   |
| gene:Sme2.5_06186.1_g00003.1 | 166.55 | 111.78 | 152.17 | 2.17   | 1.08   | 2.07   | 6.3363   | 7.28E-20   |
| gene:Sme2.5_18826.1_g00001.1 | 13.65  | 22.54  | 14.18  | 0.00   | 0.00   | 0.00   | 6.4194   | 1.56E-06   |
| gene:Sme2.5_14537.1_g00001.1 | 24.57  | 7.51   | 31.19  | 0.00   | 0.00   | 0.00   | 6.7489   | 9.24E-07   |
| novel. 2679                  | 108.30 | 7.51   | 54.82  | 0.00   | 0.00   | 1.03   | 7.2183   | 3.06E-05   |
| gene:Sme2.5_19498.1_g00001.1 | 20.02  | 31.00  | 36.86  | 0.00   | 0.00   | 0.00   | 7.2218   | 1.70E-08   |
| gene:Sme2.5_09065.1_g00002.1 | 154.72 | 167.20 | 157.85 | 2.17   | 0.00   | 1.03   | 7.2289   | 3.91E-17   |
| novel. 1412                  | 28.21  | 36.63  | 39.70  | 0.00   | 0.00   | 0.00   | 7.4726   | 2.66E-09   |
| gene:Sme2.5_03583.1_g00008.1 | 33.67  | 47.91  | 60.49  | 0.00   | 0.00   | 0.00   | 7.9149   | 2.30E-10   |
| gene:Sme2.5_04624.1_g00005.1 | 0.00   | 0.00   | 0.00   | 512.47 | 491.39 | 506.51 | -11.5209 | 2.73E-22   |
| gene:Sme2.5_11374.1_g00001.1 | 0.00   | 0.00   | 0.00   | 515.72 | 382.07 | 459.99 | -11.3673 | 1.46E-21   |
| gene:Sme2.5_02827.1_g00006.1 | 0.00   | 0.00   | 0.00   | 308.78 | 333.36 | 289.43 | -10.8235 | 9.78E-20   |
| gene:Sme2.5_16472.1_g00001.1 | 0.00   | 0.00   | 0.00   | 99.68  | 89.83  | 98.20  | -9.1288  | 4.06E-14   |
| novel. 1339                  | 0.00   | 0.00   | 0.00   | 66.09  | 73.60  | 77.53  | -8.7235  | 7.46E-13   |
| novel. 2353                  | 0.00   | 0.00   | 0.00   | 112.68 | 24.89  | 70.29  | -8.6597  | 2.44E-11   |
| novel. 2526                  | 0.00   | 0.00   | 0.00   | 58.51  | 32.47  | 53.75  | -8.1378  | 7.41E-11   |
| gene:Sme2.5_13915.1_g00001.1 | 0.00   | 0.00   | 0.00   | 46.59  | 41.13  | 52.72  | -8.0946  | 5.90E-11   |
| gene:Sme2.5_15173.1_g00001.1 | 0.00   | 0.00   | 0.00   | 55.26  | 16.24  | 40.31  | -7.7653  | 2.82E-09   |
| gene:Sme2.5_13482.1_g00001.1 | 0.00   | 0.00   | 0.00   | 41.17  | 28.14  | 39.28  | -7.7234  | 7.88E-10   |
| gene:Sme2.5_03438.1_g00003.1 | 0.00   | 0.00   | 0.00   | 36.84  | 5.41   | 26.88  | -7.0717  | 5.27E-07   |
| gene:Sme2.5_09247.1_g00003.1 | 0.00   | 0.94   | 0.00   | 65.01  | 9.74   | 52.72  | -6.9928  | 2.31E-07   |

|                              |       |        |       |         |         |         |         |            |
|------------------------------|-------|--------|-------|---------|---------|---------|---------|------------|
| gene:Sme2.5_03579.1_g00003.1 | 0.00  | 0.94   | 0.00  | 62.84   | 9.74    | 37.21   | -6.7771 | 5.72E-07   |
| novel.2483                   | 0.00  | 2.82   | 2.84  | 185.27  | 104.99  | 151.95  | -6.3046 | 7.85E-22   |
| novel.1733                   | 0.00  | 0.00   | 0.00  | 19.50   | 5.41    | 13.44   | -6.2216 | 1.40E-05   |
| gene:Sme2.5_15173.1_g00002.1 | 0.00  | 0.00   | 0.00  | 10.83   | 9.74    | 13.44   | -6.0491 | 1.44E-05   |
| novel.3201                   | 0.00  | 0.94   | 0.00  | 32.50   | 4.33    | 26.88   | -5.9925 | 2.30E-05   |
| novel.1299                   | 0.00  | 0.00   | 0.00  | 19.50   | 3.25    | 6.20    | -5.8146 | 0.00019039 |
| gene:Sme2.5_05964.1_g00004.1 | 0.00  | 0.00   | 0.00  | 9.75    | 5.41    | 13.44   | -5.7999 | 7.28E-05   |
| gene:Sme2.5_19311.1_g00001.1 | 0.91  | 0.00   | 0.95  | 27.09   | 42.21   | 34.11   | -5.7953 | 1.77E-07   |
| gene:Sme2.5_10015.1_g00002.1 | 15.47 | 18.79  | 23.63 | 997.85  | 926.49  | 1000.62 | -5.6621 | 1.38E-145  |
| gene:Sme2.5_00834.1_g00005.1 | 0.00  | 0.00   | 0.00  | 11.92   | 3.25    | 10.34   | -5.6335 | 0.00021956 |
| gene:Sme2.5_13686.1_g00002.1 | 0.00  | 0.00   | 0.95  | 16.25   | 5.41    | 24.81   | -5.5387 | 8.18E-05   |
| gene:Sme2.5_20730.1_g00001.1 | 3.64  | 2.82   | 1.89  | 193.94  | 80.09   | 96.13   | -5.4657 | 3.15E-19   |
| gene:Sme2.5_07049.1_g00003.1 | 0.00  | 0.00   | 0.00  | 6.50    | 3.25    | 12.40   | -5.4322 | 0.00052157 |
| gene:Sme2.5_16412.1_g00001.1 | 0.91  | 2.82   | 3.78  | 133.26  | 94.16   | 85.80   | -5.3916 | 5.93E-20   |
| gene:Sme2.5_03590.1_g00002.1 | 0.00  | 0.94   | 0.00  | 27.09   | 2.16    | 12.40   | -5.3785 | 0.00036428 |
| gene:Sme2.5_04924.1_g00001.1 | 0.00  | 0.00   | 0.00  | 4.33    | 10.82   | 6.20    | -5.3765 | 0.00048699 |
| gene:Sme2.5_02406.1_g00002.1 | 0.00  | 0.00   | 0.00  | 1.08    | 15.15   | 4.13    | -5.3077 | 0.00225414 |
| gene:Sme2.5_05764.1_g00002.1 | 0.00  | 0.00   | 0.00  | 11.92   | 3.25    | 5.17    | -5.3050 | 0.00087238 |
| gene:Sme2.5_17677.1_g00001.1 | 0.00  | 0.00   | 0.00  | 9.75    | 4.33    | 6.20    | -5.3020 | 0.00061705 |
| novel.137                    | 0.00  | 0.00   | 0.00  | 7.58    | 2.16    | 10.34   | -5.2903 | 0.00103421 |
| gene:Sme2.5_04269.1_g00005.1 | 0.00  | 0.00   | 0.00  | 3.25    | 9.74    | 5.17    | -5.1424 | 0.00137585 |
| gene:Sme2.5_03277.1_g00003.1 | 4.55  | 31.00  | 8.51  | 787.66  | 227.29  | 481.70  | -5.0873 | 1.07E-08   |
| novel.2414                   | 2.73  | 0.00   | 0.00  | 31.42   | 36.80   | 20.67   | -4.9953 | 3.18E-07   |
| gene:Sme2.5_04387.1_g00002.1 | 0.00  | 0.00   | 0.00  | 10.83   | 0.00    | 5.17    | -4.9604 | 0.01203293 |
| gene:Sme2.5_01431.1_g00005.1 | 50.05 | 127.75 | 84.12 | 4263.34 | 1100.75 | 2645.23 | -4.9347 | 2.47E-14   |
| gene:Sme2.5_00934.1_g00002.1 | 0.00  | 0.00   | 0.00  | 11.92   | 2.16    | 1.03    | -4.8758 | 0.00849007 |
| gene:Sme2.5_00400.1_g00011.1 | 0.91  | 0.94   | 0.00  | 22.75   | 9.74    | 20.67   | -4.8373 | 5.23E-05   |
| gene:Sme2.5_09857.1_g00001.1 | 1.82  | 1.88   | 1.89  | 56.34   | 57.36   | 41.35   | -4.7934 | 2.73E-12   |
| gene:Sme2.5_00233.1_g00010.1 | 0.00  | 0.00   | 0.00  | 6.50    | 4.33    | 3.10    | -4.7590 | 0.00457759 |
| novel.704                    | 0.00  | 0.00   | 0.00  | 8.67    | 1.08    | 4.13    | -4.7552 | 0.00810274 |

|                              |       |       |       |         |        |        |         |            |
|------------------------------|-------|-------|-------|---------|--------|--------|---------|------------|
| gene:Sme2.5_12618.1_g00001.1 | 2.73  | 2.82  | 1.89  | 120.26  | 21.65  | 55.82  | -4.7306 | 3.42E-10   |
| gene:Sme2.5_03368.1_g00002.1 | 0.91  | 0.00  | 0.00  | 6.50    | 4.33   | 14.47  | -4.6626 | 0.00174849 |
| gene:Sme2.5_16338.1_g00001.1 | 0.00  | 0.00  | 0.00  | 6.50    | 5.41   | 1.03   | -4.6518 | 0.00989337 |
| novel.345                    | 0.00  | 0.00  | 0.00  | 9.75    | 1.08   | 2.07   | -4.6478 | 0.01348946 |
| gene:Sme2.5_10291.1_g00001.1 | 0.00  | 0.00  | 0.00  | 3.25    | 2.16   | 7.24   | -4.6243 | 0.00863487 |
| novel.2176                   | 0.91  | 0.00  | 0.00  | 13.00   | 5.41   | 6.20   | -4.6187 | 0.00171723 |
| novel.172                    | 1.82  | 1.88  | 4.73  | 107.26  | 34.64  | 60.99  | -4.5948 | 4.54E-12   |
| novel.1953                   | 0.00  | 1.88  | 0.95  | 26.00   | 10.82  | 28.94  | -4.5553 | 9.29E-06   |
| gene:Sme2.5_13074.1_g00002.1 | 5.46  | 6.58  | 12.29 | 208.02  | 158.02 | 194.33 | -4.5312 | 2.58E-36   |
| gene:Sme2.5_02082.1_g00001.1 | 0.91  | 0.00  | 0.95  | 13.00   | 15.15  | 14.47  | -4.5173 | 0.00015183 |
| gene:Sme2.5_00135.1_g00015.1 | 21.84 | 51.66 | 36.86 | 1149.53 | 414.54 | 829.02 | -4.4392 | 2.04E-16   |
| gene:Sme2.5_33651.1_g00001.1 | 13.65 | 7.51  | 18.90 | 486.46  | 80.09  | 277.03 | -4.3961 | 3.44E-08   |
| gene:Sme2.5_03682.1_g00005.1 | 7.28  | 13.15 | 6.62  | 296.86  | 86.59  | 171.59 | -4.3600 | 1.79E-19   |
| gene:Sme2.5_30890.1_g00001.1 | 0.00  | 0.94  | 0.00  | 7.58    | 6.49   | 6.20   | -4.3400 | 0.00341486 |
| gene:Sme2.5_01916.1_g00001.1 | 0.00  | 1.88  | 1.89  | 35.75   | 20.56  | 18.61  | -4.3256 | 1.42E-06   |
| gene:Sme2.5_11590.1_g00001.1 | 0.00  | 1.88  | 0.00  | 9.75    | 11.91  | 15.51  | -4.3175 | 0.0005009  |
| gene:Sme2.5_10927.1_g00003.1 | 0.00  | 0.94  | 0.00  | 10.83   | 5.41   | 3.10   | -4.2701 | 0.00587312 |
| gene:Sme2.5_11742.1_g00002.1 | 0.91  | 0.00  | 0.00  | 6.50    | 4.33   | 8.27   | -4.2554 | 0.00488482 |
| gene:Sme2.5_03710.1_g00005.1 | 7.28  | 7.51  | 7.56  | 198.27  | 87.67  | 139.55 | -4.2505 | 1.53E-22   |
| novel.2892                   | 0.00  | 1.88  | 0.00  | 20.59   | 5.41   | 7.24   | -4.1528 | 0.00201636 |
| gene:Sme2.5_22772.1_g00001.1 | 25.48 | 13.15 | 30.25 | 592.64  | 233.79 | 361.79 | -4.1083 | 8.65E-29   |
| gene:Sme2.5_08450.1_g00002.1 | 0.00  | 0.00  | 0.95  | 4.33    | 2.16   | 10.34  | -4.0755 | 0.01161366 |
| novel.1026                   | 14.56 | 19.73 | 16.07 | 457.21  | 89.83  | 297.70 | -4.0686 | 2.24E-09   |
| gene:Sme2.5_05614.1_g00007.1 | 2.73  | 4.70  | 5.67  | 88.84   | 59.53  | 70.29  | -4.0662 | 2.28E-16   |
| gene:Sme2.5_00444.1_g00013.1 | 35.49 | 69.51 | 55.77 | 1224.29 | 533.60 | 878.64 | -4.0368 | 2.36E-39   |
| gene:Sme2.5_04696.1_g00007.1 | 0.00  | 0.94  | 0.00  | 7.58    | 3.25   | 5.17   | -3.9982 | 0.01090126 |
| gene:Sme2.5_08132.1_g00001.1 | 0.00  | 0.94  | 0.00  | 3.25    | 6.49   | 6.20   | -3.9945 | 0.01072583 |
| novel.1502                   | 0.00  | 2.82  | 0.00  | 14.08   | 19.48  | 9.30   | -3.9351 | 0.00034933 |
| gene:Sme2.5_28975.1_g00001.1 | 0.00  | 2.82  | 0.00  | 16.25   | 9.74   | 15.51  | -3.8901 | 0.00037254 |
| gene:Sme2.5_05326.1_g00005.1 | 1.82  | 0.00  | 0.00  | 16.25   | 4.33   | 6.20   | -3.8538 | 0.0053992  |

|                              |        |        |        |         |         |         |         |            |
|------------------------------|--------|--------|--------|---------|---------|---------|---------|------------|
| gene:Sme2.5_02579.1_g00003.1 | 2.73   | 4.70   | 0.00   | 43.34   | 27.06   | 37.21   | -3.8537 | 1.73E-08   |
| gene:Sme2.5_09448.1_g00002.1 | 7.28   | 1.88   | 4.73   | 69.34   | 66.02   | 66.16   | -3.8525 | 1.37E-15   |
| gene:Sme2.5_04446.1_g00003.1 | 0.00   | 0.00   | 2.84   | 7.58    | 17.32   | 15.51   | -3.8491 | 0.00060524 |
| gene:Sme2.5_04689.1_g00002.1 | 0.91   | 10.33  | 0.00   | 83.42   | 17.32   | 58.92   | -3.8293 | 0.00901276 |
| gene:Sme2.5_01200.1_g00005.1 | 17.29  | 15.97  | 24.57  | 487.55  | 5.41    | 318.38  | -3.8104 | 0.00421068 |
| gene:Sme2.5_01312.1_g00007.1 | 1.82   | 0.00   | 2.84   | 27.09   | 18.40   | 19.64   | -3.8055 | 5.37E-06   |
| novel.881                    | 132.87 | 52.60  | 84.12  | 1942.61 | 542.26  | 1259.04 | -3.7954 | 1.16E-09   |
| gene:Sme2.5_00401.1_g00015.1 | 1.82   | 2.82   | 0.95   | 48.75   | 3.25    | 23.77   | -3.7618 | 0.00014485 |
| gene:Sme2.5_02228.1_g00001.1 | 11.83  | 44.15  | 19.85  | 459.38  | 191.58  | 369.03  | -3.7506 | 3.38E-09   |
| gene:Sme2.5_00805.1_g00004.1 | 10.92  | 8.45   | 14.18  | 224.27  | 77.93   | 139.55  | -3.7192 | 2.76E-17   |
| gene:Sme2.5_12000.1_g00002.1 | 3.64   | 2.82   | 7.56   | 91.01   | 35.72   | 56.85   | -3.7139 | 6.04E-11   |
| gene:Sme2.5_00451.1_g00002.1 | 1.82   | 0.94   | 2.84   | 32.50   | 16.24   | 23.77   | -3.6973 | 2.22E-06   |
| gene:Sme2.5_02477.1_g00001.1 | 0.00   | 1.88   | 0.95   | 15.17   | 10.82   | 10.34   | -3.6965 | 0.00057709 |
| gene:Sme2.5_01478.1_g00002.1 | 0.91   | 0.00   | 1.89   | 22.75   | 3.25    | 9.30    | -3.6575 | 0.00256409 |
| gene:Sme2.5_00885.1_g00003.1 | 5.46   | 5.64   | 8.51   | 49.84   | 124.47  | 70.29   | -3.6429 | 2.72E-13   |
| gene:Sme2.5_24340.1_g00001.1 | 1.82   | 2.82   | 5.67   | 81.26   | 41.13   | 1.03    | -3.5836 | 0.00033334 |
| gene:Sme2.5_02774.1_g00003.1 | 2.73   | 3.76   | 1.89   | 52.01   | 12.99   | 33.08   | -3.5488 | 1.48E-06   |
| gene:Sme2.5_02324.1_g00010.1 | 12.74  | 21.60  | 15.12  | 257.86  | 115.81  | 178.83  | -3.4828 | 2.38E-21   |
| novel.2899                   | 2.73   | 0.00   | 0.00   | 5.42    | 11.91   | 13.44   | -3.4726 | 0.00358694 |
| gene:Sme2.5_02034.1_g00007.1 | 0.00   | 1.88   | 0.95   | 5.42    | 14.07   | 10.34   | -3.4120 | 0.00282603 |
| novel.2649                   | 1.82   | 0.00   | 0.95   | 19.50   | 3.25    | 6.20    | -3.3773 | 0.0067469  |
| gene:Sme2.5_19813.1_g00002.1 | 7.28   | 17.85  | 8.51   | 139.76  | 84.42   | 123.01  | -3.3705 | 6.56E-18   |
| gene:Sme2.5_23785.1_g00001.1 | 178.38 | 170.02 | 165.41 | 2527.67 | 1044.46 | 1735.57 | -3.3687 | 1.83E-37   |
| gene:Sme2.5_00553.1_g00013.1 | 0.91   | 0.94   | 0.00   | 6.50    | 6.49    | 6.20    | -3.3677 | 0.01207418 |
| gene:Sme2.5_01383.1_g00007.1 | 15.47  | 16.91  | 6.62   | 133.26  | 121.22  | 147.82  | -3.3645 | 3.50E-24   |
| gene:Sme2.5_00460.1_g00001.1 | 0.00   | 0.94   | 0.95   | 7.58    | 6.49    | 5.17    | -3.3640 | 0.01240745 |
| novel.600                    | 0.00   | 4.70   | 3.78   | 44.42   | 8.66    | 32.04   | -3.3363 | 7.72E-05   |
| novel.2436                   | 6.37   | 0.94   | 7.56   | 50.92   | 48.71   | 44.45   | -3.2740 | 3.90E-10   |
| gene:Sme2.5_00006.1_g00009.1 | 14.56  | 5.64   | 5.67   | 143.01  | 24.89   | 80.63   | -3.2603 | 1.28E-07   |
| gene:Sme2.5_05386.1_g00002.1 | 0.00   | 1.88   | 0.95   | 15.17   | 6.49    | 5.17    | -3.2567 | 0.0060842  |

|                              |        |        |        |         |         |         |         |            |
|------------------------------|--------|--------|--------|---------|---------|---------|---------|------------|
| gene:Sme2.5_09497.1_g00005.1 | 4.55   | 5.64   | 2.84   | 48.75   | 16.24   | 57.89   | -3.2384 | 4.47E-07   |
| gene:Sme2.5_01497.1_g00008.1 | 0.00   | 1.88   | 1.89   | 18.42   | 7.58    | 9.30    | -3.2378 | 0.00166282 |
| gene:Sme2.5_03057.1_g00007.1 | 2.73   | 0.00   | 3.78   | 27.09   | 15.15   | 18.61   | -3.2226 | 4.82E-05   |
| gene:Sme2.5_08781.1_g00002.1 | 15.47  | 35.69  | 29.30  | 310.95  | 166.68  | 266.69  | -3.2121 | 1.55E-22   |
| gene:Sme2.5_07540.1_g00002.1 | 3.64   | 7.51   | 5.67   | 66.09   | 30.31   | 51.68   | -3.1410 | 2.82E-09   |
| gene:Sme2.5_19689.1_g00001.1 | 2.73   | 3.76   | 0.95   | 21.67   | 21.65   | 21.71   | -3.1266 | 9.59E-06   |
| gene:Sme2.5_02567.1_g00009.1 | 36.40  | 23.48  | 29.30  | 297.95  | 233.79  | 243.95  | -3.1184 | 2.97E-38   |
| gene:Sme2.5_13307.1_g00002.1 | 502.37 | 483.76 | 549.15 | 6324.04 | 2558.67 | 4405.61 | -3.1136 | 1.55E-33   |
| gene:Sme2.5_08398.1_g00001.1 | 2.73   | 2.82   | 0.00   | 11.92   | 16.24   | 19.64   | -3.1009 | 0.00026525 |
| novel.1061                   | 0.91   | 3.76   | 0.95   | 14.08   | 17.32   | 16.54   | -3.0992 | 0.00018492 |
| gene:Sme2.5_01694.1_g00007.1 | 96.47  | 106.14 | 94.52  | 1098.61 | 558.49  | 867.27  | -3.0868 | 2.34E-38   |
| novel.1155                   | 571.54 | 267.71 | 437.62 | 4607.87 | 2613.87 | 3618.97 | -3.0856 | 7.00E-32   |
| gene:Sme2.5_00683.1_g00012.1 | 0.91   | 0.94   | 2.84   | 6.50    | 23.81   | 9.30    | -3.0843 | 0.00172846 |
| novel.1985                   | 0.91   | 2.82   | 0.95   | 11.92   | 16.24   | 11.37   | -3.0832 | 0.00060969 |
| gene:Sme2.5_07032.1_g00001.1 | 6.37   | 4.70   | 1.89   | 43.34   | 28.14   | 38.25   | -3.0763 | 5.16E-08   |
| gene:Sme2.5_01889.1_g00005.1 | 2.73   | 4.70   | 0.95   | 35.75   | 11.91   | 22.74   | -3.0708 | 4.99E-05   |
| gene:Sme2.5_12024.1_g00001.1 | 8.19   | 24.42  | 28.36  | 292.53  | 59.53   | 158.16  | -3.0659 | 9.86E-05   |
| gene:Sme2.5_13301.1_g00003.1 | 16.38  | 18.79  | 15.12  | 185.27  | 96.33   | 134.38  | -3.0481 | 6.88E-19   |
| gene:Sme2.5_00565.1_g00012.1 | 0.91   | 1.88   | 0.95   | 19.50   | 7.58    | 3.10    | -3.0140 | 0.00702814 |
| gene:Sme2.5_06864.1_g00004.1 | 3.64   | 0.94   | 0.00   | 11.92   | 12.99   | 12.40   | -3.0103 | 0.00149041 |
| novel.2484                   | 0.91   | 3.76   | 0.00   | 11.92   | 14.07   | 11.37   | -3.0026 | 0.00159435 |
| gene:Sme2.5_29718.1_g00001.1 | 0.91   | 2.82   | 0.00   | 4.33    | 14.07   | 11.37   | -2.9990 | 0.00637843 |
| gene:Sme2.5_29611.1_g00001.1 | 7.28   | 8.45   | 8.51   | 161.43  | 15.15   | 16.54   | -2.9937 | 0.00017897 |
| gene:Sme2.5_00410.1_g00007.1 | 0.00   | 10.33  | 2.84   | 57.42   | 9.74    | 37.21   | -2.9914 | 0.00062974 |
| gene:Sme2.5_03140.1_g00008.1 | 3.64   | 7.51   | 10.40  | 87.76   | 42.21   | 40.31   | -2.9857 | 1.26E-08   |
| gene:Sme2.5_07028.1_g00001.1 | 4.55   | 18.79  | 12.29  | 150.60  | 30.31   | 100.27  | -2.9832 | 3.75E-07   |
| gene:Sme2.5_29058.1_g00001.1 | 88.28  | 92.99  | 98.30  | 1052.02 | 437.27  | 709.11  | -2.9753 | 1.24E-26   |
| gene:Sme2.5_11816.1_g00001.1 | 7.28   | 3.76   | 9.45   | 110.51  | 7.58    | 42.38   | -2.9691 | 0.00012118 |
| gene:Sme2.5_04615.1_g00006.1 | 29.12  | 55.42  | 44.42  | 502.72  | 150.45  | 351.46  | -2.9625 | 2.81E-14   |
| gene:Sme2.5_08466.1_g00003.1 | 31.85  | 60.12  | 38.75  | 330.45  | 350.68  | 335.95  | -2.9616 | 2.17E-39   |

|                              |       |        |       |         |        |        |         |            |
|------------------------------|-------|--------|-------|---------|--------|--------|---------|------------|
| gene:Sme2.5_00057.1_g00034.1 | 14.56 | 19.73  | 34.03 | 91.01   | 256.52 | 179.86 | -2.9507 | 1.08E-12   |
| gene:Sme2.5_01694.1_g00008.1 | 0.91  | 0.94   | 1.89  | 10.83   | 8.66   | 9.30   | -2.9487 | 0.00327413 |
| gene:Sme2.5_03307.1_g00002.1 | 0.00  | 2.82   | 0.95  | 10.83   | 8.66   | 9.30   | -2.9455 | 0.00480643 |
| gene:Sme2.5_00018.1_g00023.1 | 9.10  | 12.21  | 14.18 | 136.51  | 47.62  | 88.90  | -2.9453 | 7.70E-11   |
| gene:Sme2.5_02838.1_g00002.1 | 26.39 | 50.72  | 53.88 | 523.30  | 124.47 | 356.62 | -2.9393 | 5.16E-06   |
| gene:Sme2.5_00418.1_g00003.1 | 49.14 | 62.94  | 44.42 | 530.89  | 272.75 | 395.91 | -2.9383 | 1.82E-27   |
| gene:Sme2.5_00375.1_g00001.1 | 8.19  | 34.76  | 4.73  | 135.43  | 110.40 | 111.64 | -2.9079 | 1.98E-08   |
| novel.1954                   | 0.91  | 4.70   | 0.95  | 17.34   | 12.99  | 18.61  | -2.9061 | 0.00035657 |
| gene:Sme2.5_31307.1_g00001.1 | 1.82  | 12.21  | 6.62  | 74.76   | 19.48  | 57.89  | -2.8857 | 8.11E-06   |
| novel.1556                   | 3.64  | 0.94   | 1.89  | 14.08   | 18.40  | 15.51  | -2.8833 | 0.00024562 |
| gene:Sme2.5_07676.1_g00005.1 | 14.56 | 18.79  | 6.62  | 45.50   | 159.10 | 89.93  | -2.8806 | 1.08E-08   |
| gene:Sme2.5_19757.1_g00001.1 | 2.73  | 0.94   | 0.95  | 5.42    | 17.32  | 11.37  | -2.8775 | 0.00325555 |
| gene:Sme2.5_03467.1_g00002.1 | 10.92 | 21.60  | 6.62  | 121.35  | 72.52  | 93.03  | -2.8741 | 3.12E-12   |
| gene:Sme2.5_05161.1_g00002.1 | 81.91 | 133.38 | 96.41 | 1044.44 | 421.03 | 785.61 | -2.8528 | 4.01E-21   |
| gene:Sme2.5_04228.1_g00002.1 | 9.10  | 7.51   | 9.45  | 74.76   | 38.96  | 74.43  | -2.8520 | 1.62E-10   |
| gene:Sme2.5_06183.1_g00001.1 | 30.03 | 61.06  | 40.64 | 360.79  | 229.46 | 349.39 | -2.8361 | 7.73E-24   |
| gene:Sme2.5_02266.1_g00009.1 | 12.74 | 25.36  | 11.34 | 171.18  | 70.35  | 106.47 | -2.8160 | 3.30E-11   |
| gene:Sme2.5_05036.1_g00004.1 | 32.76 | 50.72  | 33.08 | 433.38  | 135.29 | 243.95 | -2.8017 | 3.18E-13   |
| gene:Sme2.5_07198.1_g00003.1 | 0.91  | 1.88   | 5.67  | 15.17   | 23.81  | 19.64  | -2.8011 | 0.00015581 |
| gene:Sme2.5_13812.1_g00001.1 | 5.46  | 14.09  | 10.40 | 72.59   | 68.19  | 66.16  | -2.7928 | 1.22E-12   |
| novel.1694                   | 42.77 | 54.48  | 38.75 | 442.04  | 218.63 | 276.00 | -2.7838 | 1.30E-21   |
| gene:Sme2.5_30928.1_g00001.1 | 6.37  | 5.64   | 2.84  | 41.17   | 19.48  | 41.35  | -2.7784 | 1.88E-06   |
| gene:Sme2.5_18295.1_g00001.1 | 28.21 | 35.69  | 37.81 | 364.04  | 75.76  | 257.39 | -2.7776 | 6.11E-10   |
| gene:Sme2.5_11153.1_g00002.1 | 1.82  | 4.70   | 5.67  | 19.50   | 27.06  | 36.18  | -2.7706 | 7.88E-06   |
| gene:Sme2.5_05319.1_g00001.1 | 27.30 | 25.36  | 16.07 | 227.52  | 82.26  | 159.19 | -2.7692 | 1.66E-12   |
| gene:Sme2.5_00656.1_g00013.1 | 6.37  | 15.03  | 7.56  | 113.76  | 25.98  | 56.85  | -2.7643 | 1.64E-06   |
| gene:Sme2.5_08105.1_g00004.1 | 4.55  | 3.76   | 1.89  | 24.92   | 18.40  | 25.84  | -2.7580 | 1.76E-05   |
| gene:Sme2.5_05632.1_g00003.1 | 13.65 | 5.64   | 21.74 | 145.18  | 54.12  | 76.49  | -2.7492 | 2.84E-08   |
| novel.2684                   | 3.64  | 8.45   | 5.67  | 41.17   | 43.29  | 34.11  | -2.7417 | 3.61E-08   |
| gene:Sme2.5_05130.1_g00007.1 | 16.38 | 15.97  | 12.29 | 154.93  | 43.29  | 99.23  | -2.7356 | 3.90E-09   |

|                              |        |         |        |         |         |         |         |            |
|------------------------------|--------|---------|--------|---------|---------|---------|---------|------------|
| gene:Sme2.5_00172.1_g00015.1 | 30.94  | 42.27   | 32.14  | 319.62  | 111.48  | 268.76  | -2.7324 | 8.68E-14   |
| gene:Sme2.5_00654.1_g00004.1 | 11.83  | 24.42   | 14.18  | 198.27  | 37.88   | 97.17   | -2.7253 | 3.85E-07   |
| gene:Sme2.5_01695.1_g00006.1 | 19.11  | 25.36   | 27.41  | 227.52  | 89.83   | 156.09  | -2.7206 | 1.26E-13   |
| gene:Sme2.5_17229.1_g00001.1 | 504.19 | 409.55  | 495.27 | 3990.31 | 2146.29 | 3071.11 | -2.7081 | 1.98E-38   |
| gene:Sme2.5_01532.1_g00003.1 | 186.57 | 339.10  | 229.68 | 2437.74 | 782.54  | 1707.66 | -2.7058 | 1.75E-07   |
| gene:Sme2.5_01098.1_g00003.1 | 2.73   | 5.64    | 3.78   | 37.92   | 16.24   | 24.81   | -2.7031 | 2.29E-05   |
| gene:Sme2.5_03768.1_g00003.1 | 10.92  | 14.09   | 14.18  | 131.10  | 36.80   | 86.83   | -2.7015 | 1.64E-08   |
| novel.2968                   | 11.83  | 5.64    | 11.34  | 26.00   | 102.82  | 56.85   | -2.6869 | 1.14E-06   |
| gene:Sme2.5_03854.1_g00001.1 | 4.55   | 0.94    | 0.00   | 15.17   | 6.49    | 13.44   | -2.6632 | 0.00725872 |
| gene:Sme2.5_02078.1_g00010.1 | 132.87 | 194.44  | 143.67 | 1537.40 | 404.80  | 1031.63 | -2.6586 | 1.60E-06   |
| gene:Sme2.5_01858.1_g00009.1 | 1.82   | 0.00    | 1.89   | 7.58    | 8.66    | 7.24    | -2.6575 | 0.01326442 |
| gene:Sme2.5_04221.1_g00005.1 | 10.01  | 7.51    | 7.56   | 70.42   | 35.72   | 51.68   | -2.6514 | 7.21E-09   |
| gene:Sme2.5_04800.1_g00003.1 | 2.73   | 0.00    | 1.89   | 8.67    | 10.82   | 9.30    | -2.6324 | 0.00722797 |
| gene:Sme2.5_03549.1_g00007.1 | 488.72 | 1539.56 | 945.18 | 6948.11 | 5050.23 | 6399.60 | -2.6294 | 1.24E-08   |
| gene:Sme2.5_03836.1_g00001.1 | 5.46   | 15.03   | 0.95   | 71.51   | 23.81   | 37.21   | -2.6283 | 0.00014679 |
| gene:Sme2.5_29526.1_g00001.1 | 3.64   | 3.76    | 2.84   | 9.75    | 32.47   | 20.67   | -2.6188 | 0.00026964 |
| gene:Sme2.5_01746.1_g00004.1 | 38.22  | 35.69   | 40.64  | 386.79  | 89.83   | 226.38  | -2.6174 | 5.72E-10   |
| gene:Sme2.5_00372.1_g00013.1 | 16.38  | 31.94   | 15.12  | 215.60  | 41.13   | 132.31  | -2.6170 | 5.61E-07   |
| gene:Sme2.5_03712.1_g00004.1 | 122.86 | 211.35  | 210.78 | 1456.14 | 731.67  | 1143.27 | -2.6122 | 1.50E-22   |
| novel.2142                   | 3.64   | 0.00    | 4.73   | 14.08   | 18.40   | 18.61   | -2.6093 | 0.00074598 |
| gene:Sme2.5_15548.1_g00003.1 | 8.19   | 10.33   | 13.23  | 60.67   | 73.60   | 58.92   | -2.6071 | 9.51E-12   |
| gene:Sme2.5_09802.1_g00003.1 | 0.00   | 3.76    | 1.89   | 17.34   | 6.49    | 10.34   | -2.6050 | 0.00724622 |
| gene:Sme2.5_02031.1_g00005.1 | 15.47  | 17.85   | 22.68  | 165.77  | 44.38   | 129.21  | -2.6004 | 1.46E-08   |
| gene:Sme2.5_06806.1_g00002.1 | 40.04  | 74.21   | 60.49  | 523.30  | 168.85  | 365.93  | -2.5989 | 1.76E-12   |
| gene:Sme2.5_07178.1_g00001.1 | 6.37   | 8.45    | 4.73   | 66.09   | 9.74    | 42.38   | -2.5961 | 0.00012855 |
| novel.2506                   | 21.84  | 11.27   | 24.57  | 190.69  | 54.12   | 103.37  | -2.5929 | 3.09E-08   |
| gene:Sme2.5_04852.1_g00009.1 | 9.10   | 22.54   | 15.12  | 159.27  | 35.72   | 86.83   | -2.5927 | 9.27E-07   |
| gene:Sme2.5_11045.1_g00002.1 | 38.22  | 62.94   | 47.26  | 487.55  | 129.88  | 274.96  | -2.5885 | 1.10E-10   |
| gene:Sme2.5_02923.1_g00004.1 | 47.32  | 85.48   | 55.77  | 587.22  | 158.02  | 386.60  | -2.5857 | 8.53E-06   |
| gene:Sme2.5_00978.1_g00011.1 | 52.79  | 82.66   | 52.93  | 613.23  | 162.35  | 351.46  | -2.5809 | 6.98E-06   |

|                              |         |         |         |          |          |          |         |            |
|------------------------------|---------|---------|---------|----------|----------|----------|---------|------------|
| gene:Sme2.5_01314.1_g00011.1 | 151.07  | 211.35  | 182.42  | 1266.54  | 925.41   | 1064.71  | -2.5800 | 2.48E-49   |
| gene:Sme2.5_02517.1_g00007.1 | 21.84   | 33.82   | 17.96   | 180.93   | 119.06   | 138.52   | -2.5747 | 6.13E-17   |
| gene:Sme2.5_04405.1_g00002.1 | 112.85  | 226.38  | 164.46  | 1573.16  | 436.19   | 990.28   | -2.5743 | 8.39E-06   |
| novel.2067                   | 2.73    | 5.64    | 4.73    | 30.34    | 17.32    | 29.98    | -2.5724 | 2.13E-05   |
| gene:Sme2.5_00040.1_g00002.1 | 0.91    | 0.00    | 3.78    | 8.67     | 7.58     | 11.37    | -2.5650 | 0.01285171 |
| gene:Sme2.5_00797.1_g00013.1 | 40.95   | 34.76   | 34.03   | 336.95   | 84.42    | 226.38   | -2.5611 | 6.24E-10   |
| novel.1680                   | 2.73    | 0.94    | 2.84    | 16.25    | 10.82    | 11.37    | -2.5605 | 0.00187818 |
| gene:Sme2.5_01764.1_g00008.1 | 20.02   | 35.69   | 29.30   | 187.44   | 132.05   | 178.83   | -2.5536 | 1.45E-19   |
| gene:Sme2.5_00034.1_g00018.1 | 55.52   | 100.51  | 54.82   | 673.90   | 142.87   | 418.65   | -2.5509 | 0.0001303  |
| gene:Sme2.5_00248.1_g00002.1 | 3.64    | 4.70    | 6.62    | 45.50    | 10.82    | 31.01    | -2.5487 | 0.00013331 |
| gene:Sme2.5_00233.1_g00005.1 | 3.64    | 2.82    | 0.95    | 11.92    | 9.74     | 21.71    | -2.5474 | 0.00172959 |
| gene:Sme2.5_00239.1_g00008.1 | 36.40   | 20.67   | 18.90   | 238.36   | 47.62    | 158.16   | -2.5461 | 3.13E-07   |
| gene:Sme2.5_11288.1_g00001.1 | 55.52   | 102.39  | 66.16   | 671.73   | 184.00   | 427.95   | -2.5185 | 1.26E-05   |
| gene:Sme2.5_00091.1_g00014.1 | 12.74   | 31.94   | 15.12   | 174.43   | 47.62    | 119.91   | -2.5168 | 2.74E-07   |
| gene:Sme2.5_00040.1_g00022.1 | 0.91    | 3.76    | 2.84    | 3.25     | 29.22    | 10.34    | -2.5162 | 0.00959886 |
| gene:Sme2.5_00083.1_g00009.1 | 43.68   | 113.66  | 98.30   | 780.08   | 179.67   | 498.24   | -2.5120 | 0.00026323 |
| novel.1271                   | 20.02   | 9.39    | 20.79   | 86.68    | 89.83    | 109.57   | -2.5098 | 1.60E-13   |
| gene:Sme2.5_12975.1_g00002.1 | 10.01   | 12.21   | 9.45    | 110.51   | 12.99    | 55.82    | -2.5011 | 9.24E-05   |
| gene:Sme2.5_00155.1_g00015.1 | 50.97   | 69.51   | 55.77   | 523.30   | 123.39   | 349.39   | -2.4988 | 2.24E-05   |
| gene:Sme2.5_13579.1_g00001.1 | 421.37  | 696.04  | 562.38  | 4257.92  | 2036.98  | 3192.05  | -2.4978 | 8.09E-23   |
| gene:Sme2.5_26197.1_g00001.1 | 3.64    | 6.58    | 5.67    | 21.67    | 61.69    | 6.20     | -2.4952 | 0.00150472 |
| gene:Sme2.5_01158.1_g00008.1 | 36.40   | 44.15   | 38.75   | 338.03   | 109.32   | 222.24   | -2.4889 | 1.11E-11   |
| gene:Sme2.5_09104.1_g00001.1 | 63.71   | 84.54   | 85.07   | 712.90   | 152.61   | 443.46   | -2.4882 | 5.54E-05   |
| gene:Sme2.5_01936.1_g00012.1 | 18.20   | 31.94   | 27.41   | 192.85   | 72.52    | 168.49   | -2.4857 | 2.02E-10   |
| gene:Sme2.5_09608.1_g00002.1 | 2.73    | 6.58    | 3.78    | 14.08    | 23.81    | 35.15    | -2.4856 | 0.00012929 |
| gene:Sme2.5_06806.1_g00004.1 | 28.21   | 34.76   | 33.08   | 277.36   | 86.59    | 165.39   | -2.4627 | 2.24E-10   |
| gene:Sme2.5_10494.1_g00002.1 | 4514.96 | 5533.60 | 4858.23 | 29352.58 | 24823.63 | 27960.41 | -2.4621 | 5.91E-98   |
| gene:Sme2.5_04392.1_g00001.1 | 10.92   | 16.91   | 11.34   | 120.26   | 31.39    | 64.09    | -2.4619 | 1.27E-06   |
| novel.2200                   | 2.73    | 9.39    | 6.62    | 41.17    | 29.22    | 32.04    | -2.4553 | 3.54E-06   |
| gene:Sme2.5_01687.1_g00003.1 | 39.13   | 60.12   | 55.77   | 453.96   | 114.73   | 279.10   | -2.4518 | 1.49E-09   |



|                              |        |        |        |         |        |         |         |            |
|------------------------------|--------|--------|--------|---------|--------|---------|---------|------------|
| gene:Sme2.5_01379.1_g00001.1 | 18.20  | 15.97  | 26.47  | 158.18  | 56.28  | 116.81  | -2.4507 | 3.03E-09   |
| gene:Sme2.5_05312.1_g00007.1 | 47.32  | 81.72  | 64.27  | 543.89  | 143.95 | 368.00  | -2.4498 | 5.37E-10   |
| gene:Sme2.5_08696.1_g00001.1 | 2.73   | 1.88   | 2.84   | 17.34   | 9.74   | 13.44   | -2.4434 | 0.00177121 |
| gene:Sme2.5_00057.1_g00023.1 | 22.75  | 31.00  | 32.14  | 235.11  | 62.78  | 168.49  | -2.4419 | 1.06E-08   |
| gene:Sme2.5_00368.1_g00004.1 | 33.67  | 59.18  | 36.86  | 362.95  | 101.74 | 239.82  | -2.4418 | 2.10E-09   |
| gene:Sme2.5_01728.1_g00009.1 | 44.59  | 46.97  | 50.09  | 366.20  | 124.47 | 278.06  | -2.4404 | 2.70E-12   |
| novel.2465                   | 6.37   | 1.88   | 7.56   | 27.09   | 34.64  | 23.77   | -2.4331 | 2.32E-05   |
| gene:Sme2.5_05758.1_g00002.1 | 23.66  | 40.39  | 22.68  | 260.03  | 50.87  | 156.09  | -2.4290 | 7.27E-07   |
| gene:Sme2.5_17165.1_g00002.1 | 0.91   | 1.88   | 2.84   | 11.92   | 12.99  | 5.17    | -2.4218 | 0.00944809 |
| gene:Sme2.5_21232.1_g00001.1 | 10.92  | 18.79  | 3.78   | 37.92   | 86.59  | 54.79   | -2.4198 | 3.73E-06   |
| gene:Sme2.5_01181.1_g00002.1 | 40.95  | 61.06  | 68.05  | 478.88  | 117.98 | 312.18  | -2.4189 | 3.72E-09   |
| gene:Sme2.5_00009.1_g00021.1 | 53.70  | 89.24  | 82.23  | 633.81  | 199.15 | 369.03  | -2.4169 | 2.38E-11   |
| gene:Sme2.5_01849.1_g00004.1 | 2.73   | 4.70   | 4.73   | 15.17   | 27.06  | 21.71   | -2.3988 | 0.00015191 |
| gene:Sme2.5_00946.1_g00007.1 | 56.43  | 118.36 | 71.83  | 685.82  | 169.93 | 442.42  | -2.3963 | 0.00013708 |
| gene:Sme2.5_08418.1_g00004.1 | 20.93  | 31.94  | 22.68  | 209.10  | 69.27  | 117.84  | -2.3911 | 4.72E-09   |
| novel.924                    | 40.04  | 41.33  | 41.59  | 341.28  | 98.49  | 202.60  | -2.3852 | 5.91E-10   |
| gene:Sme2.5_04200.1_g00003.1 | 50.05  | 104.27 | 101.13 | 679.32  | 195.90 | 457.93  | -2.3840 | 4.97E-05   |
| gene:Sme2.5_00424.1_g00003.1 | 0.00   | 5.64   | 5.67   | 26.00   | 10.82  | 21.71   | -2.3801 | 0.00244712 |
| novel.131                    | 111.94 | 177.53 | 146.50 | 1159.28 | 344.19 | 752.53  | -2.3716 | 5.02E-06   |
| gene:Sme2.5_02262.1_g00002.1 | 96.47  | 155.93 | 151.23 | 1096.44 | 263.01 | 727.72  | -2.3706 | 7.44E-05   |
| gene:Sme2.5_01873.1_g00010.1 | 64.62  | 108.96 | 95.46  | 448.54  | 463.24 | 471.36  | -2.3636 | 1.59E-34   |
| gene:Sme2.5_01292.1_g00004.1 | 298.51 | 433.03 | 389.41 | 2872.20 | 967.62 | 1926.81 | -2.3630 | 3.35E-07   |
| gene:Sme2.5_02154.1_g00007.1 | 2.73   | 12.21  | 3.78   | 49.84   | 17.32  | 28.94   | -2.3624 | 0.00032207 |
| gene:Sme2.5_01001.1_g00002.1 | 5.46   | 11.27  | 6.62   | 46.59   | 44.38  | 28.94   | -2.3614 | 1.11E-06   |
| gene:Sme2.5_07089.1_g00002.1 | 69.17  | 108.96 | 69.94  | 670.65  | 196.99 | 406.24  | -2.3606 | 1.69E-10   |
| gene:Sme2.5_04532.1_g00003.1 | 0.91   | 9.39   | 0.95   | 29.25   | 9.74   | 18.61   | -2.3598 | 0.00654861 |
| gene:Sme2.5_11591.1_g00001.1 | 2.73   | 2.82   | 4.73   | 18.42   | 24.89  | 9.30    | -2.3565 | 0.00111279 |
| gene:Sme2.5_02331.1_g00005.1 | 3.64   | 6.58   | 7.56   | 9.75    | 54.12  | 26.88   | -2.3541 | 0.00064776 |
| gene:Sme2.5_06379.1_g00003.1 | 3.64   | 12.21  | 3.78   | 21.67   | 36.80  | 41.35   | -2.3496 | 5.66E-05   |
| gene:Sme2.5_00464.1_g00013.1 | 150.16 | 228.26 | 196.60 | 1470.23 | 464.33 | 993.38  | -2.3483 | 1.87E-06   |

|                              |        |        |        |         |         |         |         |            |
|------------------------------|--------|--------|--------|---------|---------|---------|---------|------------|
| gene:Sme2.5_03252.1_g00005.1 | 2.73   | 0.00   | 3.78   | 15.17   | 9.74    | 8.27    | -2.3471 | 0.01018162 |
| gene:Sme2.5_00015.1_g00016.1 | 54.61  | 109.90 | 79.40  | 702.07  | 137.46  | 397.97  | -2.3432 | 0.00063944 |
| gene:Sme2.5_16749.1_g00001.1 | 60.98  | 157.81 | 105.86 | 654.40  | 442.68  | 548.89  | -2.3429 | 5.31E-16   |
|                              | 10.01  | 15.03  | 5.67   | 73.67   | 27.06   | 54.79   | -2.3400 | 4.90E-06   |
| gene:Sme2.5_01277.1_g00009.1 | 3.64   | 2.82   | 2.84   | 16.25   | 18.40   | 12.40   | -2.3369 | 0.00091298 |
| gene:Sme2.5_00661.1_g00014.1 | 111.94 | 225.44 | 140.83 | 1081.27 | 536.84  | 793.88  | -2.3349 | 6.51E-16   |
| gene:Sme2.5_03738.1_g00001.1 | 7.28   | 21.60  | 8.51   | 86.68   | 30.31   | 71.32   | -2.3343 | 9.09E-06   |
| gene:Sme2.5_05101.1_g00003.1 | 2.73   | 3.76   | 2.84   | 16.25   | 14.07   | 16.54   | -2.3309 | 0.00084088 |
| gene:Sme2.5_06484.1_g00008.1 | 3.64   | 4.70   | 10.40  | 47.67   | 15.15   | 31.01   | -2.3281 | 0.00019617 |
| gene:Sme2.5_30574.1_g00001.1 | 34.58  | 34.76  | 17.96  | 125.68  | 95.25   | 217.08  | -2.3267 | 4.62E-10   |
| gene:Sme2.5_05397.1_g00005.1 | 8.19   | 4.70   | 6.62   | 32.50   | 20.56   | 44.45   | -2.3215 | 1.77E-05   |
| gene:Sme2.5_11666.1_g00002.1 | 12.74  | 31.00  | 14.18  | 136.51  | 62.78   | 88.90   | -2.3162 | 4.36E-08   |
| gene:Sme2.5_02631.1_g00003.1 | 5.46   | 8.45   | 7.56   | 56.34   | 19.48   | 31.01   | -2.3158 | 3.62E-05   |
| gene:Sme2.5_00538.1_g00009.1 | 58.25  | 74.21  | 56.71  | 455.05  | 162.35  | 323.55  | -2.3146 | 3.49E-12   |
| gene:Sme2.5_01365.1_g00012.1 | 53.70  | 77.96  | 47.26  | 459.38  | 125.55  | 304.94  | -2.3144 | 4.01E-09   |
| gene:Sme2.5_07246.1_g00003.1 | 2.73   | 1.88   | 0.95   | 5.42    | 11.91   | 10.34   | -2.3117 | 0.01349527 |
| gene:Sme2.5_00654.1_g00013.1 | 7.28   | 18.79  | 13.23  | 74.76   | 43.29   | 76.49   | -2.3111 | 6.69E-08   |
| gene:Sme2.5_30171.1_g00001.1 | 101.02 | 142.78 | 113.42 | 932.84  | 276.00  | 561.30  | -2.3091 | 6.11E-06   |
| gene:Sme2.5_00115.1_g00010.1 | 9.10   | 7.51   | 7.56   | 43.34   | 28.14   | 47.55   | -2.2994 | 8.76E-07   |
| gene:Sme2.5_04984.1_g00003.1 | 741.72 | 354.13 | 600.19 | 3628.44 | 1890.86 | 2826.12 | -2.2987 | 3.67E-17   |
| gene:Sme2.5_02791.1_g00006.1 | 5.46   | 7.51   | 5.67   | 36.84   | 20.56   | 34.11   | -2.2966 | 1.54E-05   |
| gene:Sme2.5_01715.1_g00007.1 | 4.55   | 5.64   | 5.67   | 42.25   | 9.74    | 25.84   | -2.2963 | 0.00056545 |
| gene:Sme2.5_07878.1_g00005.1 | 21.84  | 35.69  | 38.75  | 174.43  | 137.46  | 160.22  | -2.2963 | 8.28E-18   |
| novel.448                    | 71.90  | 24.42  | 60.49  | 305.53  | 218.63  | 244.99  | -2.2930 | 1.12E-12   |
| gene:Sme2.5_01133.1_g00006.1 | 39.13  | 34.76  | 34.97  | 199.35  | 161.27  | 171.59  | -2.2887 | 2.47E-23   |
| novel.838                    | 73.72  | 108.02 | 90.74  | 570.97  | 325.79  | 427.95  | -2.2821 | 2.68E-21   |
| gene:Sme2.5_00165.1_g00006.1 | 31.85  | 45.09  | 43.48  | 283.86  | 93.08   | 206.74  | -2.2779 | 1.12E-09   |
| gene:Sme2.5_02845.1_g00006.1 | 5.46   | 2.82   | 6.62   | 19.50   | 21.65   | 31.01   | -2.2777 | 0.00011469 |
| gene:Sme2.5_01564.1_g00002.1 | 1.82   | 4.70   | 5.67   | 24.92   | 19.48   | 14.47   | -2.2762 | 0.00053896 |
| gene:Sme2.5_02389.1_g00001.1 | 0.91   | 3.76   | 2.84   | 17.34   | 5.41    | 13.44   | -2.2758 | 0.00887731 |

|                              |         |         |         |         |         |         |         |            |
|------------------------------|---------|---------|---------|---------|---------|---------|---------|------------|
| gene:Sme2.5_05276.1_g00004.1 | 169.28  | 180.35  | 173.91  | 1250.29 | 405.88  | 877.61  | -2.2750 | 4.11E-13   |
| gene:Sme2.5_02428.1_g00001.1 | 10.92   | 15.97   | 14.18   | 78.01   | 49.79   | 70.29   | -2.2721 | 1.22E-09   |
| gene:Sme2.5_05661.1_g00001.1 | 22.75   | 70.45   | 54.82   | 199.35  | 276.00  | 236.72  | -2.2681 | 5.91E-12   |
| gene:Sme2.5_11204.1_g00001.1 | 44.59   | 74.21   | 58.60   | 295.78  | 271.67  | 285.30  | -2.2667 | 2.56E-27   |
| gene:Sme2.5_03915.1_g00005.1 | 14.56   | 6.58    | 12.29   | 82.34   | 19.48   | 58.92   | -2.2646 | 5.20E-05   |
| gene:Sme2.5_00499.1_g00001.1 | 3.64    | 7.51    | 4.73    | 30.34   | 23.81   | 21.71   | -2.2578 | 6.32E-05   |
| gene:Sme2.5_01118.1_g00007.1 | 19.11   | 30.06   | 23.63   | 151.68  | 75.76   | 119.91  | -2.2557 | 4.91E-11   |
| gene:Sme2.5_00433.1_g00008.1 | 38.22   | 48.85   | 56.71   | 423.63  | 46.54   | 215.01  | -2.2527 | 0.00628607 |
| novel.2399                   | 3.64    | 2.82    | 4.73    | 29.25   | 3.25    | 20.67   | -2.2502 | 0.00726721 |
| gene:Sme2.5_00451.1_g00006.1 | 4.55    | 0.94    | 1.89    | 14.08   | 10.82   | 10.34   | -2.2470 | 0.00674606 |
| novel.2175                   | 17.29   | 25.36   | 16.07   | 107.26  | 83.34   | 87.86   | -2.2459 | 9.58E-13   |
| gene:Sme2.5_00912.1_g00011.1 | 111.03  | 232.01  | 166.35  | 1197.20 | 303.06  | 911.72  | -2.2435 | 0.00028775 |
| gene:Sme2.5_00294.1_g00004.1 | 55.52   | 58.24   | 46.31   | 392.21  | 102.82  | 257.39  | -2.2327 | 1.33E-08   |
| gene:Sme2.5_00009.1_g00032.1 | 32.76   | 50.72   | 47.26   | 308.78  | 97.41   | 207.77  | -2.2322 | 4.51E-09   |
| gene:Sme2.5_01362.1_g00004.1 | 3.64    | 4.70    | 2.84    | 18.42   | 15.15   | 18.61   | -2.2237 | 0.00066965 |
| gene:Sme2.5_04280.1_g00003.1 | 10.92   | 22.54   | 15.12   | 134.35  | 31.39   | 59.95   | -2.2165 | 2.85E-05   |
| gene:Sme2.5_02047.1_g00006.1 | 1649.99 | 1030.45 | 1431.00 | 7471.41 | 5343.55 | 6283.83 | -2.2157 | 2.69E-32   |
| gene:Sme2.5_01561.1_g00005.1 | 122.86  | 118.36  | 124.76  | 873.25  | 234.87  | 581.97  | -2.2073 | 2.55E-05   |
| gene:Sme2.5_00942.1_g00006.1 | 53.70   | 54.48   | 41.59   | 330.45  | 117.98  | 242.92  | -2.2064 | 1.61E-10   |
| gene:Sme2.5_04410.1_g00002.1 | 19.11   | 17.85   | 18.90   | 132.18  | 55.20   | 69.26   | -2.1991 | 4.14E-08   |
| gene:Sme2.5_01739.1_g00004.1 | 44.59   | 60.12   | 32.14   | 331.53  | 95.25   | 200.54  | -2.1965 | 6.31E-08   |
| gene:Sme2.5_00983.1_g00008.1 | 2.73    | 2.82    | 0.95    | 10.83   | 7.58    | 11.37   | -2.1948 | 0.01153806 |
| gene:Sme2.5_01176.1_g00003.1 | 0.91    | 6.58    | 6.62    | 32.50   | 16.24   | 15.51   | -2.1928 | 0.00175936 |
| gene:Sme2.5_04389.1_g00001.1 | 405.90  | 630.29  | 456.52  | 3463.76 | 1185.17 | 2158.35 | -2.1892 | 2.22E-06   |
| gene:Sme2.5_24552.1_g00001.1 | 0.91    | 6.58    | 2.84    | 15.17   | 15.15   | 16.54   | -2.1890 | 0.00303336 |
| gene:Sme2.5_00595.1_g00003.1 | 292.14  | 388.88  | 333.65  | 1982.70 | 1071.52 | 1543.31 | -2.1800 | 8.81E-24   |
| gene:Sme2.5_07745.1_g00003.1 | 0.91    | 5.64    | 5.67    | 11.92   | 15.15   | 27.91   | -2.1786 | 0.0029729  |
| gene:Sme2.5_10464.1_g00001.1 | 111.03  | 443.36  | 244.80  | 505.97  | 1895.19 | 1200.12 | -2.1720 | 0.00321187 |
| gene:Sme2.5_00001.1_g00029.1 | 11.83   | 22.54   | 16.07   | 120.26  | 21.65   | 84.76   | -2.1690 | 8.53E-05   |
| gene:Sme2.5_06807.1_g00002.1 | 53.70   | 76.09   | 50.09   | 393.29  | 148.28  | 265.66  | -2.1661 | 1.14E-10   |

|                              |        |        |        |         |         |         |         |            |
|------------------------------|--------|--------|--------|---------|---------|---------|---------|------------|
| gene:Sme2.5_06919.1_g00002.1 | 46.41  | 62.00  | 45.37  | 356.45  | 100.66  | 232.58  | -2.1653 | 2.27E-08   |
| gene:Sme2.5_00116.1_g00005.1 | 5.46   | 4.70   | 0.00   | 16.25   | 8.66    | 20.67   | -2.1618 | 0.00913176 |
| gene:Sme2.5_00816.1_g00009.1 | 78.27  | 91.12  | 81.29  | 497.30  | 216.47  | 406.24  | -2.1599 | 2.94E-14   |
| gene:Sme2.5_00197.1_g00012.1 | 6.37   | 18.79  | 15.12  | 93.18   | 24.89   | 60.99   | -2.1547 | 7.34E-05   |
| novel.796                    | 121.95 | 182.23 | 143.67 | 1006.52 | 335.53  | 651.23  | -2.1542 | 3.75E-11   |
| gene:Sme2.5_00656.1_g00002.1 | 10.92  | 7.51   | 5.67   | 27.09   | 37.88   | 42.38   | -2.1523 | 7.92E-06   |
| gene:Sme2.5_08473.1_g00002.1 | 272.12 | 438.67 | 305.29 | 1926.36 | 1197.08 | 1388.25 | -2.1508 | 2.18E-22   |
| gene:Sme2.5_01022.1_g00013.1 | 536.95 | 441.49 | 495.27 | 2698.85 | 1575.90 | 2267.93 | -2.1503 | 6.12E-29   |
| gene:Sme2.5_00002.1_g00039.1 | 93.74  | 175.65 | 145.56 | 893.84  | 305.22  | 641.92  | -2.1497 | 1.91E-05   |
| gene:Sme2.5_02618.1_g00008.1 | 0.91   | 3.76   | 3.78   | 15.17   | 6.49    | 15.51   | -2.1447 | 0.00947148 |
| gene:Sme2.5_00007.1_g00019.1 | 18.20  | 30.06  | 27.41  | 161.43  | 58.45   | 113.71  | -2.1416 | 7.78E-08   |
| gene:Sme2.5_01150.1_g00003.1 | 2.73   | 3.76   | 5.67   | 27.09   | 11.91   | 14.47   | -2.1389 | 0.00192961 |
| gene:Sme2.5_06347.1_g00002.1 | 10.01  | 9.39   | 10.40  | 36.84   | 48.71   | 45.48   | -2.1367 | 2.74E-07   |
| gene:Sme2.5_06485.1_g00001.1 | 23.66  | 23.48  | 37.81  | 188.52  | 51.95   | 129.21  | -2.1224 | 1.29E-06   |
| gene:Sme2.5_07454.1_g00003.1 | 80.09  | 100.51 | 97.35  | 642.48  | 168.85  | 397.97  | -2.1215 | 1.23E-08   |
| gene:Sme2.5_08533.1_g00002.1 | 10.92  | 8.45   | 17.01  | 101.84  | 12.99   | 43.42   | -2.1209 | 0.0010493  |
| gene:Sme2.5_07121.1_g00002.1 | 8.19   | 25.36  | 15.12  | 102.93  | 19.48   | 88.90   | -2.1200 | 0.00032066 |
| gene:Sme2.5_04783.1_g00002.1 | 51.88  | 69.51  | 49.15  | 390.04  | 97.41   | 253.26  | -2.1190 | 1.71E-07   |
| gene:Sme2.5_06006.1_g00002.1 | 23.66  | 42.27  | 26.47  | 148.43  | 146.12  | 106.47  | -2.1183 | 7.15E-13   |
| gene:Sme2.5_09070.1_g00002.1 | 71.90  | 92.99  | 69.94  | 486.46  | 208.89  | 323.55  | -2.1174 | 7.23E-13   |
| novel.599                    | 58.25  | 102.39 | 94.52  | 459.38  | 274.92  | 368.00  | -2.1121 | 3.03E-16   |
| gene:Sme2.5_02758.1_g00009.1 | 62.80  | 109.90 | 93.57  | 564.47  | 186.16  | 400.04  | -2.1121 | 2.22E-09   |
| gene:Sme2.5_00085.1_g00045.1 | 32.76  | 62.00  | 36.86  | 331.53  | 66.02   | 170.56  | -2.1101 | 8.99E-06   |
| gene:Sme2.5_00499.1_g00013.1 | 59.16  | 86.42  | 58.60  | 451.79  | 113.65  | 315.28  | -2.1091 | 1.45E-07   |
| gene:Sme2.5_01319.1_g00006.1 | 11.83  | 15.97  | 11.34  | 88.84   | 28.14   | 51.68   | -2.1075 | 1.40E-05   |
| gene:Sme2.5_00926.1_g00005.1 | 20.02  | 32.88  | 40.64  | 222.11  | 48.71   | 131.28  | -2.1049 | 1.07E-05   |
| novel.2197                   | 1.82   | 21.60  | 3.78   | 30.34   | 59.53   | 26.88   | -2.1034 | 0.00377927 |
| gene:Sme2.5_00496.1_g00008.1 | 95.56  | 102.39 | 78.45  | 678.23  | 127.72  | 379.37  | -2.1004 | 0.00129787 |
| gene:Sme2.5_00295.1_g00014.1 | 6.37   | 1.88   | 1.89   | 21.67   | 6.49    | 15.51   | -2.0998 | 0.00973133 |
| gene:Sme2.5_12610.1_g00001.1 | 25.48  | 38.51  | 23.63  | 188.52  | 64.94   | 121.98  | -2.0994 | 1.41E-07   |

|                              |        |         |        |         |         |         |         |            |
|------------------------------|--------|---------|--------|---------|---------|---------|---------|------------|
| gene:Sme2.5_04124.1_g00002.1 | 31.85  | 45.09   | 34.97  | 180.93  | 154.78  | 143.68  | -2.0994 | 7.38E-18   |
| gene:Sme2.5_08452.1_g00004.1 | 5.46   | 7.51    | 4.73   | 22.75   | 31.39   | 21.71   | -2.0988 | 0.00011925 |
| gene:Sme2.5_00066.1_g00018.1 | 63.71  | 77.96   | 68.05  | 437.71  | 137.46  | 322.51  | -2.0980 | 2.44E-09   |
| gene:Sme2.5_00813.1_g00008.1 | 1.82   | 5.64    | 3.78   | 16.25   | 9.74    | 21.71   | -2.0919 | 0.0036732  |
| gene:Sme2.5_06798.1_g00008.1 | 10.01  | 11.27   | 14.18  | 63.92   | 40.05   | 46.52   | -2.0865 | 3.15E-07   |
| gene:Sme2.5_02022.1_g00007.1 | 2.73   | 15.03   | 8.51   | 66.09   | 17.32   | 27.91   | -2.0859 | 0.00168123 |
| gene:Sme2.5_06434.1_g00006.1 | 10.92  | 8.45    | 9.45   | 56.34   | 19.48   | 46.52   | -2.0850 | 4.92E-05   |
| gene:Sme2.5_08606.1_g00002.1 | 657.99 | 1031.39 | 834.59 | 5422.62 | 1727.43 | 3541.44 | -2.0827 | 9.04E-06   |
| gene:Sme2.5_13163.1_g00001.1 | 131.96 | 168.14  | 156.90 | 863.50  | 445.93  | 623.32  | -2.0806 | 1.56E-18   |
| gene:Sme2.5_01772.1_g00001.1 | 273.03 | 402.03  | 347.83 | 1797.43 | 1057.45 | 1462.68 | -2.0778 | 9.59E-23   |
| gene:Sme2.5_04997.1_g00006.1 | 4.55   | 8.45    | 4.73   | 44.42   | 8.66    | 21.71   | -2.0772 | 0.00287866 |
| novel.1178                   | 15.47  | 10.33   | 12.29  | 78.01   | 16.24   | 66.16   | -2.0736 | 0.00020295 |
| novel.1420                   | 10.92  | 6.58    | 17.01  | 52.01   | 44.38   | 48.58   | -2.0718 | 8.28E-07   |
| gene:Sme2.5_00257.1_g00012.1 | 2.73   | 3.76    | 4.73   | 8.67    | 23.81   | 14.47   | -2.0682 | 0.00431579 |
| gene:Sme2.5_03529.1_g00002.1 | 2.73   | 2.82    | 2.84   | 15.17   | 6.49    | 13.44   | -2.0669 | 0.00958669 |
| gene:Sme2.5_10198.1_g00001.1 | 11.83  | 14.09   | 6.62   | 49.84   | 41.13   | 45.48   | -2.0668 | 7.65E-07   |
| gene:Sme2.5_03393.1_g00002.1 | 47.32  | 77.96   | 66.16  | 443.13  | 113.65  | 241.88  | -2.0610 | 3.68E-07   |
| gene:Sme2.5_00236.1_g00019.1 | 187.48 | 294.01  | 235.35 | 1473.48 | 560.66  | 956.17  | -2.0607 | 4.99E-12   |
| gene:Sme2.5_08192.1_g00002.1 | 32.76  | 19.73   | 25.52  | 141.93  | 62.78   | 120.94  | -2.0606 | 2.16E-08   |
| gene:Sme2.5_11618.1_g00003.1 | 406.81 | 584.26  | 412.10 | 2338.07 | 1502.30 | 2004.33 | -2.0586 | 3.82E-25   |
| gene:Sme2.5_01980.1_g00004.1 | 155.63 | 173.78  | 187.15 | 899.26  | 555.24  | 688.44  | -2.0529 | 1.97E-25   |
| gene:Sme2.5_06843.1_g00001.1 | 26.39  | 49.78   | 32.14  | 117.01  | 189.41  | 141.62  | -2.0496 | 1.81E-11   |
| gene:Sme2.5_00159.1_g00011.1 | 20.02  | 67.63   | 46.31  | 294.70  | 86.59   | 172.63  | -2.0488 | 9.35E-06   |
| gene:Sme2.5_13141.1_g00001.1 | 52.79  | 76.09   | 56.71  | 372.70  | 158.02  | 236.72  | -2.0483 | 6.73E-11   |
| gene:Sme2.5_06578.1_g00002.1 | 8.19   | 3.76    | 3.78   | 30.34   | 19.48   | 15.51   | -2.0478 | 0.00095095 |
| gene:Sme2.5_01723.1_g00008.1 | 22.75  | 31.00   | 34.97  | 178.77  | 56.28   | 131.28  | -2.0469 | 5.41E-07   |
| gene:Sme2.5_00017.1_g00028.1 | 55.52  | 51.66   | 51.98  | 354.29  | 81.18   | 222.24  | -2.0468 | 8.62E-07   |
| gene:Sme2.5_00029.1_g00035.1 | 38.22  | 46.03   | 37.81  | 226.44  | 90.92   | 186.07  | -2.0446 | 1.49E-09   |
| novel.1388                   | 10.92  | 35.69   | 28.36  | 161.43  | 47.62   | 99.23   | -2.0416 | 3.16E-05   |
| gene:Sme2.5_00795.1_g00009.1 | 273.03 | 384.19  | 362.95 | 2094.29 | 668.89  | 1434.77 | -2.0409 | 2.08E-05   |

|                              |        |        |        |         |        |        |         |            |
|------------------------------|--------|--------|--------|---------|--------|--------|---------|------------|
| gene:Sme2.5_00599.1_g00011.1 | 5.46   | 8.45   | 4.73   | 16.25   | 32.47  | 27.91  | -2.0406 | 0.00031017 |
| gene:Sme2.5_00986.1_g00002.1 | 31.85  | 37.57  | 40.64  | 186.35  | 152.61 | 112.67 | -2.0368 | 1.23E-13   |
| gene:Sme2.5_00986.1_g00001.1 | 6.37   | 6.58   | 4.73   | 36.84   | 7.58   | 27.91  | -2.0328 | 0.00262487 |
| gene:Sme2.5_00519.1_g00004.1 | 33.67  | 31.94  | 28.36  | 172.27  | 63.86  | 147.82 | -2.0306 | 4.63E-08   |
| novel.1569                   | 0.91   | 6.58   | 5.67   | 28.17   | 9.74   | 15.51  | -2.0266 | 0.00731282 |
| gene:Sme2.5_02690.1_g00005.1 | 10.92  | 41.33  | 24.57  | 176.60  | 38.96  | 97.17  | -2.0265 | 0.00020474 |
| gene:Sme2.5_08675.1_g00001.1 | 38.22  | 40.39  | 26.47  | 197.19  | 108.23 | 119.91 | -2.0160 | 1.53E-10   |
| gene:Sme2.5_01056.1_g00003.1 | 30.03  | 32.88  | 37.81  | 216.69  | 70.35  | 119.91 | -2.0148 | 2.53E-07   |
| gene:Sme2.5_06077.1_g00004.1 | 6.37   | 6.58   | 4.73   | 20.59   | 28.14  | 22.74  | -2.0145 | 0.00021643 |
| gene:Sme2.5_08462.1_g00002.1 | 0.91   | 7.51   | 3.78   | 18.42   | 15.15  | 15.51  | -2.0131 | 0.00499435 |
| gene:Sme2.5_02228.1_g00006.1 | 116.49 | 92.99  | 81.29  | 606.73  | 123.39 | 443.46 | -2.0129 | 0.00166272 |
| gene:Sme2.5_00196.1_g00012.1 | 33.67  | 78.90  | 68.05  | 349.95  | 123.39 | 253.26 | -2.0091 | 2.00E-07   |
| novel.1600                   | 4.55   | 7.51   | 2.84   | 40.09   | 6.49   | 13.44  | -2.0090 | 0.01102401 |
| gene:Sme2.5_00157.1_g00008.1 | 16.38  | 32.88  | 21.74  | 143.01  | 38.96  | 103.37 | -2.0080 | 1.71E-05   |
| novel.3113                   | 6.37   | 6.58   | 3.78   | 27.09   | 17.32  | 22.74  | -2.0034 | 0.00045937 |
| gene:Sme2.5_00924.1_g00008.1 | 78.27  | 79.84  | 93.57  | 492.97  | 139.62 | 370.06 | -1.9944 | 4.67E-08   |
| gene:Sme2.5_04233.1_g00005.1 | 8.19   | 1.88   | 4.73   | 33.59   | 10.82  | 14.47  | -1.9874 | 0.00629942 |
| gene:Sme2.5_06445.1_g00003.1 | 147.43 | 150.29 | 161.63 | 604.56  | 595.29 | 619.18 | -1.9859 | 8.46E-52   |
| gene:Sme2.5_00228.1_g00013.1 | 68.26  | 45.09  | 54.82  | 341.28  | 99.58  | 224.31 | -1.9833 | 2.30E-07   |
| gene:Sme2.5_02322.1_g00002.1 | 62.80  | 92.05  | 71.83  | 472.38  | 124.47 | 298.74 | -1.9824 | 3.00E-07   |
| gene:Sme2.5_00029.1_g00030.1 | 53.70  | 68.57  | 50.09  | 361.87  | 102.82 | 216.04 | -1.9817 | 2.42E-07   |
| gene:Sme2.5_00622.1_g00012.1 | 2.73   | 9.39   | 2.84   | 28.17   | 18.40  | 12.40  | -1.9800 | 0.00411102 |
| gene:Sme2.5_07093.1_g00001.1 | 27.30  | 22.54  | 13.23  | 122.43  | 33.55  | 93.03  | -1.9798 | 3.48E-05   |
| gene:Sme2.5_18998.1_g00001.1 | 21.84  | 14.09  | 16.07  | 93.18   | 51.95  | 59.95  | -1.9773 | 1.78E-07   |
| novel.215                    | 35.49  | 61.06  | 46.31  | 263.28  | 108.23 | 190.20 | -1.9760 | 7.19E-09   |
| gene:Sme2.5_02331.1_g00006.1 | 2.73   | 5.64   | 4.73   | 11.92   | 28.14  | 11.37  | -1.9752 | 0.00503418 |
| gene:Sme2.5_04999.1_g00004.1 | 2.73   | 9.39   | 11.34  | 48.75   | 11.91  | 31.01  | -1.9697 | 0.00281754 |
| gene:Sme2.5_00347.1_g00012.1 | 81.91  | 96.75  | 69.00  | 477.80  | 161.27 | 327.68 | -1.9648 | 6.26E-09   |
| gene:Sme2.5_00912.1_g00002.1 | 220.24 | 218.86 | 261.81 | 1334.80 | 510.87 | 888.98 | -1.9641 | 4.07E-12   |
| gene:Sme2.5_03039.1_g00005.1 | 25.48  | 17.85  | 24.57  | 97.51   | 92.00  | 75.46  | -1.9626 | 8.28E-11   |

|                              |         |         |         |         |         |         |         |            |
|------------------------------|---------|---------|---------|---------|---------|---------|---------|------------|
| gene:Sme2.5_03641.1_g00005.1 | 169.28  | 188.81  | 170.13  | 751.91  | 572.56  | 733.92  | -1.9626 | 3.62E-35   |
| gene:Sme2.5_00043.1_g00021.1 | 311.25  | 559.84  | 382.80  | 2491.91 | 770.63  | 1610.50 | -1.9585 | 0.00011794 |
| gene:Sme2.5_00694.1_g00005.1 | 15.47   | 22.54   | 17.01   | 101.84  | 44.38   | 67.19   | -1.9560 | 1.04E-06   |
| gene:Sme2.5_01332.1_g00007.1 | 40.95   | 60.12   | 60.49   | 274.11  | 112.56  | 238.78  | -1.9538 | 4.54E-09   |
| novel.922                    | 22.75   | 29.12   | 40.64   | 172.27  | 62.78   | 123.01  | -1.9537 | 6.26E-07   |
| gene:Sme2.5_05951.1_g00005.1 | 49.14   | 50.72   | 36.86   | 281.69  | 89.83   | 158.16  | -1.9533 | 2.59E-07   |
| gene:Sme2.5_02747.1_g00002.1 | 25.48   | 40.39   | 23.63   | 180.93  | 45.46   | 119.91  | -1.9524 | 1.85E-05   |
| novel.2496                   | 12.74   | 3.76    | 6.62    | 26.00   | 37.88   | 25.84   | -1.9512 | 0.0003067  |
| novel.649                    | 7.28    | 4.70    | 7.56    | 19.50   | 23.81   | 32.04   | -1.9483 | 0.00031484 |
| gene:Sme2.5_01812.1_g00002.1 | 16.38   | 44.15   | 40.64   | 224.27  | 53.03   | 112.67  | -1.9477 | 8.73E-05   |
| gene:Sme2.5_00204.1_g00002.1 | 60.98   | 99.57   | 70.89   | 474.55  | 114.73  | 301.84  | -1.9451 | 0.0010948  |
| gene:Sme2.5_09172.1_g00002.1 | 10.01   | 7.51    | 11.34   | 56.34   | 19.48   | 35.15   | -1.9423 | 0.0002039  |
| gene:Sme2.5_00358.1_g00010.1 | 10.01   | 2.82    | 3.78    | 27.09   | 19.48   | 17.57   | -1.9419 | 0.00196474 |
| gene:Sme2.5_00437.1_g00005.1 | 12.74   | 16.91   | 21.74   | 100.76  | 25.98   | 70.29   | -1.9403 | 9.03E-05   |
| gene:Sme2.5_02516.1_g00004.1 | 57.34   | 77.96   | 64.27   | 384.62  | 139.62  | 239.82  | -1.9370 | 6.88E-09   |
| gene:Sme2.5_02844.1_g00003.1 | 332.18  | 423.64  | 344.05  | 1779.01 | 1045.55 | 1383.08 | -1.9358 | 2.95E-22   |
| gene:Sme2.5_08105.1_g00003.1 | 5.46    | 2.82    | 5.67    | 13.00   | 23.81   | 16.54   | -1.9339 | 0.00264907 |
| novel.595                    | 23.66   | 34.76   | 39.70   | 186.35  | 57.36   | 130.25  | -1.9314 | 2.79E-06   |
| novel.794                    | 10.92   | 15.97   | 16.07   | 78.01   | 44.38   | 41.35   | -1.9310 | 3.85E-06   |
| novel.1937                   | 17.29   | 17.85   | 11.34   | 11.92   | 111.48  | 53.75   | -1.9297 | 0.00240828 |
| novel.456                    | 21.84   | 22.54   | 28.36   | 147.35  | 46.54   | 82.70   | -1.9272 | 5.43E-06   |
| gene:Sme2.5_01582.1_g00007.1 | 50.05   | 106.14  | 86.96   | 193.94  | 443.76  | 285.30  | -1.9252 | 7.49E-09   |
| gene:Sme2.5_02355.1_g00005.1 | 16.38   | 12.21   | 13.23   | 79.09   | 25.98   | 53.75   | -1.9239 | 4.71E-05   |
| gene:Sme2.5_10545.1_g00001.1 | 9.10    | 15.03   | 8.51    | 24.92   | 58.45   | 40.31   | -1.9228 | 7.52E-05   |
| gene:Sme2.5_23342.1_g00001.1 | 1028.40 | 1535.81 | 1184.31 | 6892.85 | 2390.90 | 4911.08 | -1.9210 | 9.10E-06   |
| gene:Sme2.5_02049.1_g00004.1 | 92.83   | 196.32  | 168.24  | 599.14  | 477.31  | 653.30  | -1.9200 | 2.02E-14   |
| gene:Sme2.5_14409.1_g00001.1 | 6.37    | 3.76    | 5.67    | 24.92   | 18.40   | 16.54   | -1.9190 | 0.00119129 |
| gene:Sme2.5_09846.1_g00004.1 | 300.33  | 452.76  | 399.81  | 1974.03 | 879.95  | 1504.03 | -1.9186 | 2.76E-13   |
| gene:Sme2.5_00146.1_g00007.1 | 438.66  | 619.02  | 500.95  | 2991.38 | 921.08  | 1967.12 | -1.9155 | 9.24E-05   |
| gene:Sme2.5_01907.1_g00002.1 | 0.91    | 3.76    | 10.40   | 27.09   | 11.91   | 17.57   | -1.9146 | 0.01146074 |

|                              |        |        |        |         |        |         |         |            |
|------------------------------|--------|--------|--------|---------|--------|---------|---------|------------|
| gene:Sme2.5_00147.1_g00015.1 | 22.75  | 32.88  | 34.97  | 180.93  | 49.79  | 110.61  | -1.9144 | 9.86E-06   |
| gene:Sme2.5_00726.1_g00011.1 | 94.65  | 146.54 | 107.75 | 593.73  | 257.60 | 461.03  | -1.9115 | 6.13E-11   |
| gene:Sme2.5_06317.1_g00006.1 | 10.92  | 11.27  | 4.73   | 22.75   | 46.54  | 32.04   | -1.9101 | 0.00021498 |
| novel.2627                   | 11.83  | 26.30  | 16.07  | 72.59   | 55.20  | 75.46   | -1.9095 | 2.52E-07   |
| gene:Sme2.5_09141.1_g00002.1 | 11.83  | 18.79  | 17.01  | 88.84   | 24.89  | 64.09   | -1.9019 | 0.00010161 |
| gene:Sme2.5_02752.1_g00002.1 | 39.13  | 49.78  | 44.42  | 203.69  | 129.88 | 164.36  | -1.9015 | 8.66E-14   |
| gene:Sme2.5_00658.1_g00007.1 | 61.89  | 95.81  | 68.05  | 400.87  | 163.43 | 276.00  | -1.8965 | 2.43E-09   |
| gene:Sme2.5_02286.1_g00004.1 | 2.73   | 3.76   | 5.67   | 9.75    | 24.89  | 10.34   | -1.8888 | 0.01034154 |
| gene:Sme2.5_05087.1_g00004.1 | 6.37   | 13.15  | 17.96  | 76.92   | 12.99  | 48.58   | -1.8879 | 0.00249002 |
| gene:Sme2.5_00126.1_g00007.1 | 53.70  | 82.66  | 66.16  | 321.78  | 149.36 | 277.03  | -1.8861 | 3.51E-10   |
| gene:Sme2.5_00110.1_g00016.1 | 35.49  | 53.54  | 46.31  | 239.44  | 93.08  | 167.46  | -1.8859 | 5.24E-08   |
| gene:Sme2.5_00018.1_g00015.1 | 66.44  | 193.50 | 131.38 | 645.73  | 264.09 | 532.35  | -1.8821 | 0.00073659 |
| gene:Sme2.5_00236.1_g00006.1 | 21.84  | 16.91  | 15.12  | 70.42   | 70.35  | 57.89   | -1.8800 | 1.74E-08   |
| gene:Sme2.5_06341.1_g00001.1 | 16.38  | 62.00  | 34.03  | 146.26  | 119.06 | 147.82  | -1.8799 | 8.64E-07   |
| novel.928                    | 10.01  | 15.97  | 13.23  | 52.01   | 49.79  | 42.38   | -1.8797 | 1.11E-06   |
| gene:Sme2.5_06919.1_g00001.1 | 5.46   | 19.73  | 17.01  | 67.17   | 38.96  | 48.58   | -1.8778 | 5.94E-05   |
| gene:Sme2.5_00077.1_g00004.1 | 20.02  | 36.63  | 34.03  | 124.60  | 93.08  | 114.74  | -1.8765 | 2.34E-10   |
| gene:Sme2.5_13363.1_g00003.1 | 42.77  | 23.48  | 47.26  | 206.94  | 67.11  | 142.65  | -1.8759 | 4.79E-06   |
| gene:Sme2.5_00639.1_g00005.1 | 47.32  | 62.00  | 72.78  | 334.78  | 103.91 | 228.45  | -1.8738 | 4.64E-07   |
| gene:Sme2.5_06599.1_g00003.1 | 46.41  | 57.30  | 47.26  | 186.35  | 203.48 | 161.26  | -1.8679 | 1.32E-17   |
| novel.2341                   | 9.10   | 13.15  | 12.29  | 45.50   | 40.05  | 40.31   | -1.8672 | 3.68E-06   |
| gene:Sme2.5_02131.1_g00005.1 | 13.65  | 12.21  | 10.40  | 26.00   | 62.78  | 43.42   | -1.8652 | 5.14E-05   |
| gene:Sme2.5_00146.1_g00006.1 | 186.57 | 301.53 | 237.24 | 1354.30 | 440.52 | 843.49  | -1.8630 | 0.00014732 |
| novel.1272                   | 18.20  | 11.27  | 9.45   | 53.09   | 40.05  | 48.58   | -1.8609 | 4.28E-06   |
| gene:Sme2.5_00221.1_g00007.1 | 10.01  | 6.58   | 10.40  | 23.84   | 38.96  | 35.15   | -1.8597 | 9.40E-05   |
| gene:Sme2.5_00758.1_g00011.1 | 13.65  | 31.94  | 19.85  | 93.18   | 49.79  | 94.07   | -1.8592 | 3.33E-06   |
| gene:Sme2.5_04732.1_g00004.1 | 307.61 | 526.03 | 367.68 | 2159.30 | 644.00 | 1546.41 | -1.8563 | 0.00047452 |
| gene:Sme2.5_05632.1_g00002.1 | 9.10   | 13.15  | 11.34  | 55.26   | 23.81  | 42.38   | -1.8555 | 7.99E-05   |
| gene:Sme2.5_01170.1_g00012.1 | 7.28   | 15.97  | 11.34  | 56.34   | 30.31  | 38.25   | -1.8543 | 5.94E-05   |
| gene:Sme2.5_00925.1_g00010.1 | 11.83  | 16.91  | 13.23  | 79.09   | 24.89  | 47.55   | -1.8527 | 0.00013556 |



|                              |        |        |        |         |         |         |         |            |
|------------------------------|--------|--------|--------|---------|---------|---------|---------|------------|
| novel. 2848                  | 6.37   | 4.70   | 8.51   | 20.59   | 31.39   | 18.61   | -1.8498 | 0.00088615 |
| novel. 1331                  | 2.73   | 5.64   | 9.45   | 24.92   | 16.24   | 22.74   | -1.8477 | 0.00215927 |
| gene:Sme2.5_00252.1_g00002.1 | 4.55   | 4.70   | 5.67   | 23.84   | 17.32   | 12.40   | -1.8431 | 0.00316549 |
| gene:Sme2.5_02470.1_g00003.1 | 15.47  | 20.67  | 20.79  | 87.76   | 33.55   | 82.70   | -1.8430 | 1.52E-05   |
| gene:Sme2.5_29077.1_g00001.1 | 209.32 | 300.59 | 174.86 | 844.00  | 857.22  | 754.60  | -1.8425 | 2.92E-21   |
| gene:Sme2.5_02350.1_g00001.1 | 5.46   | 10.33  | 12.29  | 48.75   | 21.65   | 29.98   | -1.8405 | 0.00042563 |
| gene:Sme2.5_02187.1_g00011.1 | 68.26  | 92.99  | 75.61  | 124.60  | 445.93  | 277.03  | -1.8394 | 8.67E-07   |
| gene:Sme2.5_01832.1_g00007.1 | 9.10   | 7.51   | 5.67   | 35.75   | 14.07   | 29.98   | -1.8389 | 0.00107037 |
| gene:Sme2.5_01800.1_g00006.1 | 437.75 | 518.51 | 521.74 | 2244.89 | 1242.53 | 1788.29 | -1.8358 | 1.72E-19   |
| gene:Sme2.5_00049.1_g00008.1 | 56.43  | 106.14 | 82.23  | 437.71  | 147.20  | 286.33  | -1.8320 | 4.07E-07   |
| gene:Sme2.5_12311.1_g00003.1 | 10.01  | 10.33  | 7.56   | 34.67   | 34.64   | 29.98   | -1.8294 | 4.25E-05   |
| gene:Sme2.5_01878.1_g00007.1 | 2.73   | 8.45   | 6.62   | 19.50   | 20.56   | 22.74   | -1.8241 | 0.00176845 |
| gene:Sme2.5_02933.1_g00010.1 | 3.64   | 3.76   | 3.78   | 15.17   | 12.99   | 11.37   | -1.8214 | 0.0085268  |
| novel. 3276                  | 10.01  | 5.64   | 9.45   | 42.25   | 22.73   | 23.77   | -1.8200 | 0.00046215 |
| gene:Sme2.5_00678.1_g00011.1 | 313.07 | 363.52 | 336.48 | 1512.48 | 895.10  | 1169.11 | -1.8200 | 2.30E-21   |
| gene:Sme2.5_02516.1_g00007.1 | 3.64   | 4.70   | 4.73   | 18.42   | 15.15   | 12.40   | -1.8157 | 0.00520382 |
| gene:Sme2.5_06324.1_g00005.1 | 3.64   | 4.70   | 6.62   | 27.09   | 14.07   | 11.37   | -1.8132 | 0.00627451 |
| gene:Sme2.5_00194.1_g00018.1 | 8.19   | 8.45   | 9.45   | 32.50   | 19.48   | 39.28   | -1.8083 | 0.00028374 |
| gene:Sme2.5_00011.1_g00001.1 | 10.01  | 5.64   | 1.89   | 17.34   | 14.07   | 29.98   | -1.8040 | 0.00692847 |
| gene:Sme2.5_00008.1_g00018.1 | 114.67 | 136.20 | 106.81 | 549.30  | 306.30  | 389.70  | -1.7997 | 1.22E-14   |
| gene:Sme2.5_00135.1_g00021.1 | 23.66  | 31.94  | 31.19  | 96.43   | 89.83   | 114.74  | -1.7964 | 1.00E-10   |
| gene:Sme2.5_04335.1_g00001.1 | 262.11 | 211.35 | 268.43 | 1143.03 | 556.33  | 876.57  | -1.7958 | 8.47E-14   |
| gene:Sme2.5_00343.1_g00009.1 | 56.43  | 91.12  | 85.07  | 344.53  | 196.99  | 264.63  | -1.7941 | 1.06E-11   |
| gene:Sme2.5_06476.1_g00003.1 | 63.71  | 56.36  | 77.50  | 148.43  | 329.03  | 204.67  | -1.7877 | 2.99E-09   |
| gene:Sme2.5_21893.1_g00001.1 | 35.49  | 44.15  | 34.03  | 175.52  | 35.72   | 180.90  | -1.7870 | 0.00022811 |
| gene:Sme2.5_24757.1_g00001.1 | 4.55   | 7.51   | 3.78   | 32.50   | 9.74    | 12.40   | -1.7852 | 0.01155413 |
| gene:Sme2.5_00875.1_g00002.1 | 0.91   | 17.85  | 11.34  | 30.34   | 38.96   | 34.11   | -1.7847 | 0.00513785 |
| novel. 993                   | 4.55   | 20.67  | 14.18  | 63.92   | 25.98   | 45.48   | -1.7841 | 0.00101286 |
| gene:Sme2.5_10927.1_g00002.1 | 13.65  | 36.63  | 23.63  | 98.59   | 80.09   | 75.46   | -1.7837 | 6.74E-07   |
| gene:Sme2.5_04063.1_g00004.1 | 7.28   | 23.48  | 12.29  | 60.67   | 55.20   | 32.04   | -1.7819 | 0.00019344 |

|                              |        |        |        |         |        |         |         |            |
|------------------------------|--------|--------|--------|---------|--------|---------|---------|------------|
| gene:Sme2.5_01620.1_g00005.1 | 18.20  | 39.45  | 19.85  | 112.68  | 82.26  | 71.32   | -1.7812 | 9.79E-07   |
| gene:Sme2.5_04968.1_g00001.1 | 56.43  | 109.90 | 73.72  | 301.20  | 239.20 | 283.23  | -1.7798 | 4.64E-13   |
| gene:Sme2.5_00038.1_g00008.1 | 293.05 | 413.31 | 386.58 | 1677.17 | 815.01 | 1248.70 | -1.7754 | 2.80E-13   |
| novel.298                    | 125.59 | 174.72 | 144.61 | 752.99  | 283.57 | 484.80  | -1.7739 | 5.07E-09   |
| novel.676                    | 42.77  | 37.57  | 53.88  | 263.28  | 59.53  | 135.41  | -1.7714 | 6.35E-05   |
| gene:Sme2.5_09212.1_g00004.1 | 17.29  | 19.73  | 19.85  | 92.09   | 35.72  | 66.16   | -1.7707 | 1.70E-05   |
| gene:Sme2.5_00845.1_g00001.1 | 48.23  | 42.27  | 36.86  | 169.02  | 135.29 | 130.25  | -1.7690 | 2.62E-13   |
| gene:Sme2.5_11504.1_g00002.1 | 15.47  | 25.36  | 25.52  | 96.43   | 42.21  | 86.83   | -1.7668 | 9.35E-06   |
| novel.1918                   | 56.43  | 124.93 | 68.05  | 240.52  | 316.05 | 291.50  | -1.7665 | 3.18E-10   |
| gene:Sme2.5_09941.1_g00002.1 | 20.93  | 30.06  | 35.92  | 146.26  | 44.38  | 104.40  | -1.7646 | 3.82E-05   |
| gene:Sme2.5_00190.1_g00010.1 | 6.37   | 23.48  | 11.34  | 70.42   | 31.39  | 37.21   | -1.7565 | 0.00089136 |
| gene:Sme2.5_01860.1_g00008.1 | 18.20  | 15.03  | 15.12  | 53.09   | 50.87  | 58.92   | -1.7515 | 4.93E-07   |
| gene:Sme2.5_05161.1_g00004.1 | 29.12  | 28.18  | 34.03  | 135.43  | 48.71  | 123.01  | -1.7505 | 6.90E-06   |
| novel.2287                   | 9.10   | 13.15  | 9.45   | 37.92   | 31.39  | 37.21   | -1.7497 | 4.88E-05   |
| gene:Sme2.5_06058.1_g00001.1 | 5.46   | 2.82   | 3.78   | 10.83   | 17.32  | 12.40   | -1.7462 | 0.01196397 |
| gene:Sme2.5_00661.1_g00008.1 | 45.50  | 64.81  | 53.88  | 223.19  | 153.69 | 173.66  | -1.7461 | 5.08E-13   |
| gene:Sme2.5_00099.1_g00019.1 | 113.76 | 100.51 | 111.53 | 488.63  | 216.47 | 386.60  | -1.7445 | 1.93E-10   |
| gene:Sme2.5_09387.1_g00001.1 | 14.56  | 11.27  | 9.45   | 56.34   | 17.32  | 44.45   | -1.7419 | 0.00079647 |
| gene:Sme2.5_01489.1_g00005.1 | 40.95  | 64.81  | 56.71  | 184.18  | 142.87 | 215.01  | -1.7401 | 9.34E-12   |
| gene:Sme2.5_00069.1_g00023.1 | 3.64   | 3.76   | 4.73   | 15.17   | 8.66   | 16.54   | -1.7379 | 0.01269716 |
| gene:Sme2.5_01595.1_g00003.1 | 63.71  | 65.75  | 93.57  | 358.62  | 148.28 | 236.72  | -1.7377 | 4.00E-08   |
| novel.2608                   | 30.03  | 27.24  | 40.64  | 133.26  | 86.59  | 106.47  | -1.7373 | 2.90E-09   |
| gene:Sme2.5_02075.1_g00004.1 | 36.40  | 24.42  | 19.85  | 104.01  | 66.02  | 98.20   | -1.7313 | 2.07E-07   |
| novel.177                    | 7.28   | 15.97  | 23.63  | 85.59   | 12.99  | 56.85   | -1.7313 | 0.00616985 |
| gene:Sme2.5_18636.1_g00001.1 | 9.10   | 2.82   | 4.73   | 21.67   | 14.07  | 19.64   | -1.7296 | 0.00592719 |
| gene:Sme2.5_23827.1_g00001.1 | 10.92  | 8.45   | 5.67   | 40.09   | 11.91  | 31.01   | -1.7268 | 0.00334528 |
| gene:Sme2.5_04107.1_g00007.1 | 269.39 | 341.92 | 317.58 | 1653.33 | 505.46 | 912.75  | -1.7254 | 0.00034512 |
| gene:Sme2.5_00795.1_g00008.1 | 269.39 | 458.39 | 339.32 | 1701.00 | 599.62 | 1224.93 | -1.7242 | 0.00026442 |
| gene:Sme2.5_05172.1_g00007.1 | 145.61 | 152.17 | 163.52 | 712.90  | 287.90 | 522.02  | -1.7231 | 7.99E-10   |
| gene:Sme2.5_03205.1_g00006.1 | 31.85  | 44.15  | 31.19  | 118.10  | 112.56 | 123.01  | -1.7230 | 1.04E-11   |

|                              |        |        |        |         |         |         |         |            |
|------------------------------|--------|--------|--------|---------|---------|---------|---------|------------|
| gene:Sme2.5_01039.1_g00008.1 | 7.28   | 12.21  | 6.62   | 42.25   | 9.74    | 34.11   | -1.7228 | 0.00545524 |
| gene:Sme2.5_03182.1_g00007.1 | 52.79  | 68.57  | 37.81  | 292.53  | 87.67   | 144.72  | -1.7212 | 2.24E-05   |
| gene:Sme2.5_01464.1_g00011.1 | 10.92  | 9.39   | 13.23  | 46.59   | 18.40   | 45.48   | -1.7207 | 0.00054848 |
| novel.2088                   | 6.37   | 8.45   | 5.67   | 26.00   | 24.89   | 16.54   | -1.7168 | 0.0015919  |
| gene:Sme2.5_00621.1_g00021.1 | 73.72  | 96.75  | 69.94  | 268.69  | 241.36  | 279.10  | -1.7153 | 7.15E-19   |
| gene:Sme2.5_02159.1_g00003.1 | 6.37   | 9.39   | 3.78   | 23.84   | 17.32   | 22.74   | -1.7088 | 0.0025519  |
| novel.476                    | 17.29  | 23.48  | 21.74  | 89.93   | 47.62   | 66.16   | -1.7052 | 2.41E-06   |
| gene:Sme2.5_00377.1_g00007.1 | 22.75  | 31.94  | 24.57  | 111.59  | 64.94   | 81.66   | -1.7043 | 1.69E-07   |
| gene:Sme2.5_04561.1_g00003.1 | 7.28   | 11.27  | 7.56   | 35.75   | 11.91   | 37.21   | -1.7025 | 0.00306056 |
| gene:Sme2.5_07360.1_g00002.1 | 83.73  | 99.57  | 79.40  | 380.29  | 159.10  | 315.28  | -1.7022 | 1.21E-08   |
| gene:Sme2.5_00850.1_g00008.1 | 3.64   | 9.39   | 3.78   | 18.42   | 24.89   | 11.37   | -1.7015 | 0.00937572 |
| novel.558                    | 149.25 | 231.08 | 225.90 | 783.33  | 508.70  | 678.10  | -1.7010 | 4.32E-15   |
| gene:Sme2.5_07084.1_g00004.1 | 533.31 | 635.93 | 550.09 | 2260.06 | 1486.06 | 1829.64 | -1.6974 | 5.62E-24   |
| gene:Sme2.5_28576.1_g00001.1 | 151.07 | 165.32 | 70.89  | 644.65  | 181.83  | 428.98  | -1.6967 | 0.0054986  |
| gene:Sme2.5_01699.1_g00012.1 | 8.19   | 5.64   | 8.51   | 31.42   | 14.07   | 26.88   | -1.6962 | 0.00226788 |
| gene:Sme2.5_02398.1_g00008.1 | 33.67  | 13.15  | 28.36  | 124.60  | 25.98   | 93.03   | -1.6955 | 0.00144391 |
| gene:Sme2.5_05807.1_g00001.1 | 29.12  | 43.21  | 36.86  | 189.60  | 54.12   | 109.57  | -1.6944 | 4.92E-05   |
| gene:Sme2.5_06077.1_g00005.1 | 1.82   | 8.45   | 7.56   | 23.84   | 12.99   | 20.67   | -1.6942 | 0.00889321 |
| novel.3242                   | 5.46   | 2.82   | 7.56   | 13.00   | 21.65   | 16.54   | -1.6925 | 0.00765575 |
| gene:Sme2.5_18982.1_g00001.1 | 78.27  | 53.54  | 58.60  | 287.11  | 135.29  | 193.30  | -1.6922 | 1.63E-08   |
| gene:Sme2.5_00211.1_g00002.1 | 8.19   | 2.82   | 4.73   | 18.42   | 9.74    | 22.74   | -1.6914 | 0.01177342 |
| gene:Sme2.5_00529.1_g00007.1 | 32.76  | 25.36  | 34.97  | 130.01  | 69.27   | 101.30  | -1.6908 | 1.31E-07   |
| gene:Sme2.5_03715.1_g00002.1 | 19.11  | 14.09  | 14.18  | 54.17   | 35.72   | 63.06   | -1.6903 | 1.65E-05   |
| gene:Sme2.5_00536.1_g00017.1 | 153.81 | 223.56 | 169.19 | 706.40  | 405.88  | 645.03  | -1.6853 | 4.24E-13   |
| gene:Sme2.5_00845.1_g00004.1 | 4.55   | 7.51   | 8.51   | 28.17   | 11.91   | 25.84   | -1.6836 | 0.00440239 |
| novel.2572                   | 9.10   | 24.42  | 17.01  | 20.59   | 90.92   | 50.65   | -1.6835 | 0.00251439 |
| gene:Sme2.5_03618.1_g00001.1 | 16.38  | 23.48  | 24.57  | 59.59   | 70.35   | 76.49   | -1.6823 | 1.92E-07   |
| gene:Sme2.5_00737.1_g00013.1 | 162.00 | 289.31 | 202.27 | 897.09  | 563.90  | 635.72  | -1.6820 | 2.76E-12   |
| novel.1222                   | 9.10   | 2.82   | 9.45   | 40.09   | 12.99   | 15.51   | -1.6798 | 0.01234632 |
| novel.472                    | 173.83 | 178.47 | 180.53 | 596.98  | 537.93  | 571.63  | -1.6795 | 1.43E-37   |

|                              |         |         |         |         |         |         |         |            |
|------------------------------|---------|---------|---------|---------|---------|---------|---------|------------|
| gene:Sme2.5_00014.1_g00007.1 | 153.81  | 207.59  | 177.69  | 814.75  | 342.02  | 569.57  | -1.6793 | 1.42E-09   |
| gene:Sme2.5_02192.1_g00002.1 | 1417.92 | 1892.75 | 1640.83 | 7488.74 | 2718.86 | 5645.01 | -1.6788 | 8.35E-05   |
| gene:Sme2.5_00733.1_g00016.1 | 1.82    | 7.51    | 5.67    | 17.34   | 11.91   | 18.61   | -1.6787 | 0.01239949 |
| gene:Sme2.5_09591.1_g00002.1 | 50.05   | 53.54   | 29.30   | 176.60  | 111.48  | 137.48  | -1.6780 | 1.11E-08   |
| gene:Sme2.5_01881.1_g00008.1 | 35.49   | 31.94   | 34.03   | 95.34   | 120.14  | 108.54  | -1.6749 | 6.16E-11   |
| gene:Sme2.5_00653.1_g00013.1 | 609.76  | 715.77  | 667.30  | 3080.22 | 1180.84 | 2100.47 | -1.6746 | 5.98E-10   |
| gene:Sme2.5_00014.1_g00029.1 | 13.65   | 22.54   | 18.90   | 72.59   | 38.96   | 64.09   | -1.6746 | 1.54E-05   |
| gene:Sme2.5_01484.1_g00001.1 | 30.94   | 40.39   | 34.03   | 81.26   | 135.29  | 118.87  | -1.6716 | 9.06E-09   |
| gene:Sme2.5_01402.1_g00008.1 | 16.38   | 15.97   | 17.01   | 41.17   | 71.43   | 44.45   | -1.6691 | 1.57E-05   |
| gene:Sme2.5_05841.1_g00002.1 | 44.59   | 39.45   | 41.59   | 188.52  | 69.27   | 141.62  | -1.6685 | 2.47E-06   |
| gene:Sme2.5_04902.1_g00003.1 | 41.86   | 77.96   | 38.75   | 187.44  | 135.29  | 180.90  | -1.6679 | 1.70E-08   |
| gene:Sme2.5_08883.1_g00001.1 | 19.11   | 12.21   | 6.62    | 19.50   | 61.69   | 39.28   | -1.6641 | 0.00234922 |
| gene:Sme2.5_09070.1_g00003.1 | 5.46    | 4.70    | 5.67    | 14.08   | 19.48   | 16.54   | -1.6623 | 0.00588941 |
| gene:Sme2.5_11014.1_g00001.1 | 29.12   | 34.76   | 53.88   | 119.18  | 107.15  | 145.75  | -1.6623 | 8.40E-09   |
| gene:Sme2.5_20670.1_g00001.1 | 28.21   | 17.85   | 21.74   | 108.34  | 43.29   | 63.06   | -1.6613 | 4.80E-05   |
| gene:Sme2.5_10077.1_g00002.1 | 52.79   | 60.12   | 53.88   | 239.44  | 125.55  | 161.26  | -1.6578 | 2.06E-09   |
| gene:Sme2.5_02513.1_g00003.1 | 22.75   | 27.24   | 19.85   | 89.93   | 43.29   | 86.83   | -1.6563 | 9.04E-06   |
| gene:Sme2.5_20220.1_g00001.1 | 57.34   | 38.51   | 32.14   | 107.26  | 161.27  | 134.38  | -1.6526 | 9.35E-09   |
| gene:Sme2.5_05787.1_g00001.1 | 85.55   | 87.36   | 87.90   | 333.70  | 205.65  | 280.13  | -1.6519 | 4.52E-14   |
| gene:Sme2.5_00039.1_g00007.1 | 6.37    | 3.76    | 3.78    | 16.25   | 15.15   | 12.40   | -1.6508 | 0.0111402  |
| gene:Sme2.5_14644.1_g00001.1 | 14.56   | 21.60   | 9.45    | 54.17   | 41.13   | 47.55   | -1.6466 | 4.20E-05   |
| gene:Sme2.5_01584.1_g00007.1 | 8.19    | 13.15   | 14.18   | 61.76   | 16.24   | 33.08   | -1.6461 | 0.002973   |
| gene:Sme2.5_00265.1_g00007.1 | 57.34   | 108.02  | 68.05   | 321.78  | 184.00  | 224.31  | -1.6457 | 1.37E-08   |
| gene:Sme2.5_00471.1_g00002.1 | 342.19  | 426.46  | 357.28  | 1501.65 | 834.49  | 1185.65 | -1.6453 | 2.96E-15   |
| gene:Sme2.5_29755.1_g00001.1 | 174.74  | 257.38  | 201.32  | 922.01  | 356.09  | 702.91  | -1.6452 | 3.00E-08   |
| gene:Sme2.5_20796.1_g00001.1 | 86.46   | 80.78   | 54.82   | 238.36  | 247.86  | 208.81  | -1.6446 | 2.06E-14   |
| novel.2497                   | 24.57   | 27.24   | 29.30   | 80.17   | 94.16   | 78.56   | -1.6410 | 6.23E-09   |
| gene:Sme2.5_10011.1_g00001.1 | 7.28    | 16.91   | 17.01   | 46.59   | 40.05   | 41.35   | -1.6386 | 9.20E-05   |
| gene:Sme2.5_00580.1_g00009.1 | 10.92   | 18.79   | 14.18   | 42.25   | 46.54   | 47.55   | -1.6377 | 1.85E-05   |
| gene:Sme2.5_06347.1_g00003.1 | 17.29   | 10.33   | 10.40   | 40.09   | 43.29   | 35.15   | -1.6366 | 7.68E-05   |

|                              |         |         |         |         |         |         |         |            |
|------------------------------|---------|---------|---------|---------|---------|---------|---------|------------|
| gene:Sme2.5_07217.1_g00002.1 | 2.73    | 8.45    | 9.45    | 29.25   | 11.91   | 22.74   | -1.6352 | 0.00950231 |
| gene:Sme2.5_06902.1_g00002.1 | 22.75   | 69.51   | 41.59   | 147.35  | 115.81  | 151.95  | -1.6347 | 3.06E-06   |
| gene:Sme2.5_01542.1_g00011.1 | 271.21  | 355.07  | 291.12  | 896.01  | 993.59  | 957.20  | -1.6341 | 4.25E-32   |
| gene:Sme2.5_00441.1_g00010.1 | 48.23   | 51.66   | 44.42   | 223.19  | 80.09   | 144.72  | -1.6341 | 3.22E-06   |
| gene:Sme2.5_04554.1_g00004.1 | 35.49   | 60.12   | 53.88   | 203.69  | 98.49   | 160.22  | -1.6303 | 3.17E-07   |
| gene:Sme2.5_10699.1_g00003.1 | 1178.57 | 1684.22 | 1427.22 | 5784.49 | 3053.30 | 4397.34 | -1.6254 | 1.36E-13   |
| gene:Sme2.5_04042.1_g00006.1 | 29.12   | 40.39   | 27.41   | 113.76  | 82.26   | 102.34  | -1.6227 | 1.31E-08   |
| novel.2603                   | 25.48   | 25.36   | 23.63   | 58.51   | 93.08   | 77.53   | -1.6211 | 2.78E-07   |
| gene:Sme2.5_07423.1_g00002.1 | 30.03   | 37.57   | 30.25   | 143.01  | 83.34   | 74.43   | -1.6195 | 9.99E-07   |
| gene:Sme2.5_05891.1_g00003.1 | 29.12   | 44.15   | 26.47   | 100.76  | 97.41   | 107.50  | -1.6166 | 6.72E-09   |
| gene:Sme2.5_00564.1_g00007.1 | 4.55    | 5.64    | 7.56    | 21.67   | 11.91   | 20.67   | -1.6150 | 0.0073913  |
| gene:Sme2.5_00696.1_g00013.1 | 212.96  | 123.99  | 171.08  | 659.82  | 389.64  | 506.51  | -1.6143 | 3.23E-11   |
| gene:Sme2.5_03411.1_g00001.1 | 50.05   | 77.96   | 94.52   | 338.03  | 129.88  | 212.94  | -1.6140 | 3.67E-06   |
| gene:Sme2.5_01841.1_g00011.1 | 22.75   | 37.57   | 34.97   | 110.51  | 77.93   | 102.34  | -1.6115 | 6.62E-08   |
| gene:Sme2.5_05788.1_g00006.1 | 12.74   | 10.33   | 10.40   | 34.67   | 33.55   | 34.11   | -1.6110 | 0.00012877 |
| gene:Sme2.5_20357.1_g00001.1 | 8.19    | 2.82    | 11.34   | 16.25   | 29.22   | 22.74   | -1.6098 | 0.00655421 |
| gene:Sme2.5_00044.1_g00031.1 | 26.39   | 35.69   | 33.08   | 141.93  | 57.36   | 90.97   | -1.6093 | 1.11E-05   |
| gene:Sme2.5_05859.1_g00002.1 | 193.85  | 130.57  | 140.83  | 614.31  | 333.36  | 471.36  | -1.6083 | 5.86E-11   |
| gene:Sme2.5_01424.1_g00004.1 | 173.83  | 173.78  | 194.71  | 720.49  | 365.83  | 562.33  | -1.6042 | 6.52E-12   |
| gene:Sme2.5_07480.1_g00003.1 | 23.66   | 45.09   | 39.70   | 133.26  | 83.34   | 112.67  | -1.6042 | 3.24E-07   |
| gene:Sme2.5_09507.1_g00002.1 | 80.09   | 100.51  | 92.63   | 297.95  | 277.08  | 255.32  | -1.6040 | 1.86E-19   |
| gene:Sme2.5_04537.1_g00005.1 | 5.46    | 5.64    | 4.73    | 15.17   | 20.56   | 12.40   | -1.6032 | 0.00961445 |
| gene:Sme2.5_02198.1_g00010.1 | 16.38   | 27.24   | 36.86   | 89.93   | 68.19   | 85.80   | -1.6024 | 2.02E-06   |
| gene:Sme2.5_08187.1_g00005.1 | 11.83   | 10.33   | 7.56    | 31.42   | 21.65   | 37.21   | -1.6023 | 0.00077341 |
| gene:Sme2.5_03378.1_g00004.1 | 9.10    | 4.70    | 4.73    | 23.84   | 9.74    | 22.74   | -1.6018 | 0.01162698 |
| gene:Sme2.5_01904.1_g00009.1 | 14.56   | 7.51    | 17.96   | 32.50   | 44.38   | 44.45   | -1.6000 | 0.00021441 |
| gene:Sme2.5_13103.1_g00001.1 | 11.83   | 9.39    | 10.40   | 44.42   | 15.15   | 36.18   | -1.5982 | 0.0022257  |
| gene:Sme2.5_01907.1_g00008.1 | 12.74   | 17.85   | 20.79   | 87.76   | 29.22   | 38.25   | -1.5955 | 0.00103316 |
| gene:Sme2.5_01731.1_g00007.1 | 486.90  | 657.53  | 618.15  | 2668.52 | 879.95  | 1765.55 | -1.5921 | 0.00056428 |
| gene:Sme2.5_06706.1_g00005.1 | 6.37    | 15.97   | 7.56    | 46.59   | 23.81   | 19.64   | -1.5907 | 0.00454682 |

|                              |        |        |        |         |         |         |         |            |
|------------------------------|--------|--------|--------|---------|---------|---------|---------|------------|
| gene:Sme2.5_02165.1_g00005.1 | 282.13 | 340.04 | 314.74 | 1110.53 | 726.25  | 984.08  | -1.5904 | 3.56E-19   |
| gene:Sme2.5_00179.1_g00014.1 | 6.37   | 8.45   | 4.73   | 31.42   | 12.99   | 14.47   | -1.5889 | 0.0107702  |
| gene:Sme2.5_00043.1_g00014.1 | 28.21  | 38.51  | 40.64  | 157.10  | 71.43   | 94.07   | -1.5878 | 4.55E-06   |
| gene:Sme2.5_00345.1_g00027.1 | 26.39  | 19.73  | 17.01  | 79.09   | 53.03   | 57.89   | -1.5872 | 4.76E-06   |
| gene:Sme2.5_12679.1_g00002.1 | 17.29  | 36.63  | 22.68  | 73.67   | 92.00   | 64.09   | -1.5856 | 5.14E-06   |
| gene:Sme2.5_04548.1_g00001.1 | 10.01  | 14.09  | 13.23  | 36.84   | 36.80   | 38.25   | -1.5853 | 8.91E-05   |
| gene:Sme2.5_00079.1_g00013.1 | 103.75 | 137.14 | 87.90  | 492.97  | 171.01  | 322.51  | -1.5851 | 2.33E-06   |
| gene:Sme2.5_02550.1_g00007.1 | 247.54 | 204.77 | 220.23 | 798.50  | 508.70  | 709.11  | -1.5838 | 6.42E-17   |
| gene:Sme2.5_06182.1_g00001.1 | 60.98  | 112.72 | 78.45  | 305.53  | 231.62  | 217.08  | -1.5813 | 4.47E-10   |
| gene:Sme2.5_00047.1_g00026.1 | 344.01 | 401.09 | 374.29 | 1440.98 | 733.83  | 1174.28 | -1.5812 | 1.12E-12   |
| gene:Sme2.5_00211.1_g00004.1 | 7.28   | 9.39   | 4.73   | 23.84   | 18.40   | 21.71   | -1.5786 | 0.0035665  |
| gene:Sme2.5_00695.1_g00007.1 | 118.31 | 141.84 | 126.65 | 529.80  | 266.26  | 358.69  | -1.5780 | 2.37E-10   |
| gene:Sme2.5_01505.1_g00004.1 | 10.01  | 16.91  | 11.34  | 61.76   | 14.07   | 38.25   | -1.5768 | 0.00509545 |
| gene:Sme2.5_00003.1_g00061.1 | 11.83  | 17.85  | 16.07  | 58.51   | 43.29   | 34.11   | -1.5712 | 9.71E-05   |
| gene:Sme2.5_05647.1_g00004.1 | 91.92  | 158.75 | 134.22 | 482.13  | 306.30  | 354.56  | -1.5709 | 1.00E-10   |
| gene:Sme2.5_08403.1_g00003.1 | 7.28   | 6.58   | 11.34  | 30.34   | 23.81   | 20.67   | -1.5706 | 0.00202033 |
| novel.1765                   | 8.19   | 8.45   | 8.51   | 33.59   | 12.99   | 27.91   | -1.5671 | 0.00427303 |
| gene:Sme2.5_05344.1_g00006.1 | 9.10   | 15.97  | 11.34  | 39.00   | 34.64   | 34.11   | -1.5667 | 0.00020543 |
| gene:Sme2.5_00081.1_g00014.1 | 183.84 | 105.21 | 146.50 | 559.06  | 343.10  | 388.67  | -1.5667 | 2.65E-10   |
| gene:Sme2.5_01582.1_g00002.1 | 22.75  | 16.91  | 20.79  | 43.34   | 73.60   | 62.02   | -1.5651 | 1.16E-05   |
| gene:Sme2.5_02309.1_g00012.1 | 175.65 | 255.50 | 226.84 | 876.50  | 417.79  | 649.16  | -1.5628 | 1.15E-09   |
| gene:Sme2.5_00747.1_g00004.1 | 81.00  | 54.48  | 69.94  | 263.28  | 117.98  | 225.35  | -1.5618 | 4.08E-07   |
| novel.712                    | 3.64   | 5.64   | 8.51   | 17.34   | 18.40   | 16.54   | -1.5590 | 0.00887983 |
| gene:Sme2.5_10242.1_g00001.1 | 33.67  | 8.45   | 19.85  | 78.01   | 30.31   | 74.43   | -1.5583 | 0.00244867 |
| gene:Sme2.5_03753.1_g00003.1 | 508.74 | 584.26 | 514.18 | 2328.31 | 785.78  | 1617.73 | -1.5579 | 0.00040817 |
| gene:Sme2.5_02142.1_g00008.1 | 122.86 | 164.38 | 130.43 | 628.40  | 192.66  | 406.24  | -1.5551 | 5.41E-06   |
| novel.1295                   | 7.28   | 17.85  | 20.79  | 54.17   | 34.64   | 45.48   | -1.5516 | 0.00045432 |
| gene:Sme2.5_31190.1_g00001.1 | 10.92  | 13.15  | 12.29  | 16.25   | 50.87   | 39.28   | -1.5502 | 0.00238059 |
| gene:Sme2.5_00136.1_g00023.1 | 229.34 | 271.47 | 295.84 | 801.75  | 746.82  | 780.44  | -1.5483 | 3.31E-30   |
| gene:Sme2.5_01361.1_g00002.1 | 384.97 | 699.80 | 485.82 | 1649.00 | 1416.79 | 1526.77 | -1.5482 | 1.27E-14   |

|                              |         |         |         |          |         |          |         |            |
|------------------------------|---------|---------|---------|----------|---------|----------|---------|------------|
| gene:Sme2.5_02762.1_g00006.1 | 1185.85 | 1421.21 | 1301.51 | 4711.88  | 2856.31 | 3844.31  | -1.5459 | 5.07E-18   |
| gene:Sme2.5_01077.1_g00016.1 | 23.66   | 43.21   | 31.19   | 138.68   | 58.45   | 88.90    | -1.5452 | 4.43E-05   |
| novel.2012                   | 45.50   | 66.69   | 58.60   | 148.43   | 165.60  | 181.93   | -1.5396 | 9.30E-12   |
| gene:Sme2.5_01435.1_g00005.1 | 173.83  | 177.53  | 165.41  | 485.38   | 544.42  | 471.36   | -1.5382 | 3.94E-28   |
| gene:Sme2.5_00339.1_g00003.1 | 7.28    | 8.45    | 10.40   | 39.00    | 15.15   | 21.71    | -1.5382 | 0.00535652 |
| gene:Sme2.5_10435.1_g00002.1 | 366.77  | 594.60  | 451.80  | 1209.12  | 1527.19 | 1360.34  | -1.5358 | 6.79E-17   |
| gene:Sme2.5_07965.1_g00002.1 | 66.44   | 77.03   | 66.16   | 263.28   | 142.87  | 201.57   | -1.5357 | 2.43E-09   |
| gene:Sme2.5_01689.1_g00007.1 | 9.10    | 19.73   | 6.62    | 49.84    | 23.81   | 28.94    | -1.5335 | 0.00393437 |
| gene:Sme2.5_04668.1_g00002.1 | 3755.03 | 4515.36 | 4040.64 | 15024.08 | 8351.39 | 12254.45 | -1.5331 | 2.72E-15   |
| gene:Sme2.5_02192.1_g00004.1 | 1193.13 | 1513.26 | 1443.29 | 5582.97  | 2215.56 | 4199.90  | -1.5318 | 7.39E-09   |
| gene:Sme2.5_00269.1_g00006.1 | 85.55   | 104.27  | 113.42  | 446.38   | 164.52  | 265.66   | -1.5316 | 1.79E-06   |
| gene:Sme2.5_02087.1_g00003.1 | 233.89  | 393.58  | 262.76  | 1044.44  | 719.76  | 808.35   | -1.5311 | 2.32E-12   |
| gene:Sme2.5_02364.1_g00004.1 | 21.84   | 11.27   | 10.40   | 56.34    | 31.39   | 38.25    | -1.5299 | 0.00067891 |
| gene:Sme2.5_14818.1_g00001.1 | 68.26   | 79.84   | 45.37   | 185.27   | 199.15  | 173.66   | -1.5276 | 7.88E-11   |
| gene:Sme2.5_05861.1_g00004.1 | 34.58   | 38.51   | 40.64   | 111.59   | 104.99  | 110.61   | -1.5252 | 3.11E-10   |
| gene:Sme2.5_03303.1_g00001.1 | 31.85   | 11.27   | 24.57   | 73.67    | 55.20   | 66.16    | -1.5245 | 7.25E-05   |
| gene:Sme2.5_00646.1_g00010.1 | 1251.37 | 1708.64 | 1382.80 | 4424.77  | 3891.04 | 4166.82  | -1.5233 | 7.03E-29   |
| gene:Sme2.5_00025.1_g00018.1 | 550.60  | 429.27  | 464.08  | 1809.35  | 931.90  | 1397.56  | -1.5191 | 8.28E-12   |
| novel.1278                   | 39.13   | 46.03   | 42.53   | 133.26   | 115.81  | 116.81   | -1.5190 | 9.43E-11   |
| gene:Sme2.5_02096.1_g00002.1 | 21.84   | 19.73   | 16.07   | 33.59    | 73.60   | 57.89    | -1.5174 | 0.00014233 |
| novel.2970                   | 9.10    | 5.64    | 7.56    | 17.34    | 21.65   | 24.81    | -1.5158 | 0.00453382 |
| gene:Sme2.5_00386.1_g00005.1 | 81.00   | 92.05   | 101.13  | 358.62   | 162.35  | 262.56   | -1.5152 | 6.71E-08   |
| gene:Sme2.5_00008.1_g00037.1 | 127.41  | 181.29  | 155.01  | 578.56   | 342.02  | 401.07   | -1.5113 | 3.75E-11   |
| gene:Sme2.5_05203.1_g00003.1 | 786.32  | 851.97  | 873.35  | 2808.28  | 1878.95 | 2446.76  | -1.5062 | 8.79E-22   |
| gene:Sme2.5_01117.1_g00009.1 | 17.29   | 26.30   | 25.52   | 75.84    | 50.87   | 69.26    | -1.5057 | 7.92E-06   |
| gene:Sme2.5_02680.1_g00008.1 | 35.49   | 56.36   | 66.16   | 163.60   | 116.89  | 167.46   | -1.5053 | 7.08E-08   |
| gene:Sme2.5_10740.1_g00006.1 | 4.55    | 6.58    | 12.29   | 24.92    | 23.81   | 17.57    | -1.5043 | 0.00686834 |
| gene:Sme2.5_00479.1_g00006.1 | 10.92   | 21.60   | 17.96   | 56.34    | 34.64   | 51.68    | -1.5014 | 0.00020171 |
| gene:Sme2.5_01509.1_g00005.1 | 49.14   | 54.48   | 53.88   | 196.10   | 103.91  | 145.75   | -1.5011 | 6.18E-08   |
| gene:Sme2.5_05967.1_g00003.1 | 116.49  | 133.38  | 129.49  | 477.80   | 254.35  | 340.09   | -1.4991 | 2.40E-10   |

|                              |         |         |         |          |          |          |         |            |
|------------------------------|---------|---------|---------|----------|----------|----------|---------|------------|
| gene:Sme2.5_01365.1_g00007.1 | 451.40  | 215.11  | 344.99  | 1343.47  | 520.61   | 994.41   | -1.4987 | 0.00200507 |
| gene:Sme2.5_05308.1_g00001.1 | 7.28    | 12.21   | 8.51    | 18.42    | 38.96    | 21.71    | -1.4986 | 0.00461451 |
| gene:Sme2.5_07680.1_g00002.1 | 4404.83 | 6270.97 | 5448.02 | 17691.51 | 11743.46 | 16068.79 | -1.4968 | 7.84E-17   |
| gene:Sme2.5_00346.1_g00023.1 | 10.01   | 3.76    | 6.62    | 17.34    | 23.81    | 16.54    | -1.4964 | 0.01037028 |
| gene:Sme2.5_03389.1_g00002.1 | 257.56  | 316.55  | 280.72  | 1131.11  | 438.35   | 840.39   | -1.4953 | 9.90E-08   |
| gene:Sme2.5_01110.1_g00006.1 | 982.90  | 1205.16 | 1093.57 | 4393.35  | 1736.08  | 3103.15  | -1.4923 | 1.55E-08   |
| gene:Sme2.5_09386.1_g00003.1 | 11.83   | 15.03   | 11.34   | 29.25    | 33.55    | 44.45    | -1.4912 | 0.00042344 |
| gene:Sme2.5_03403.1_g00001.1 | 38.22   | 61.06   | 49.15   | 192.85   | 98.49    | 125.08   | -1.4888 | 1.72E-06   |
| gene:Sme2.5_01333.1_g00008.1 | 195.67  | 238.59  | 258.98  | 909.01   | 402.63   | 630.55   | -1.4864 | 1.60E-08   |
| gene:Sme2.5_01750.1_g00007.1 | 141.06  | 195.38  | 142.72  | 655.48   | 231.62   | 454.83   | -1.4858 | 2.88E-06   |
| gene:Sme2.5_00345.1_g00012.1 | 39.13   | 46.03   | 52.93   | 163.60   | 96.33    | 126.11   | -1.4839 | 8.83E-08   |
| gene:Sme2.5_02857.1_g00002.1 | 416.82  | 619.02  | 535.92  | 1536.32  | 1329.12  | 1526.77  | -1.4829 | 1.32E-20   |
| gene:Sme2.5_16026.1_g00001.1 | 1097.57 | 1302.85 | 1182.42 | 3436.67  | 3321.72  | 3255.10  | -1.4829 | 1.33E-47   |
| gene:Sme2.5_01772.1_g00002.1 | 97.38   | 88.30   | 82.23   | 271.94   | 202.40   | 272.90   | -1.4796 | 1.16E-13   |
| gene:Sme2.5_07180.1_g00002.1 | 30.94   | 41.33   | 32.14   | 83.42    | 102.82   | 104.40   | -1.4781 | 4.04E-08   |
| gene:Sme2.5_00170.1_g00016.1 | 95.56   | 95.81   | 103.02  | 374.87   | 192.66   | 252.22   | -1.4774 | 5.26E-09   |
| gene:Sme2.5_03248.1_g00008.1 | 29.12   | 20.67   | 19.85   | 66.09    | 63.86    | 64.09    | -1.4763 | 2.74E-06   |
| gene:Sme2.5_16284.1_g00003.1 | 61.89   | 45.09   | 66.16   | 112.68   | 220.80   | 147.82   | -1.4747 | 6.03E-07   |
| novel.1969                   | 50.97   | 62.94   | 54.82   | 218.86   | 103.91   | 145.75   | -1.4736 | 7.65E-07   |
| gene:Sme2.5_01521.1_g00001.1 | 160.18  | 227.32  | 192.82  | 756.24   | 323.62   | 529.25   | -1.4716 | 1.10E-07   |
| gene:Sme2.5_00287.1_g00019.1 | 20.02   | 15.03   | 16.07   | 56.34    | 36.80    | 48.58    | -1.4699 | 8.69E-05   |
| gene:Sme2.5_13103.1_g00002.1 | 975.62  | 1315.06 | 1103.97 | 4522.28  | 1811.85  | 3065.94  | -1.4694 | 3.52E-08   |
| gene:Sme2.5_00983.1_g00006.1 | 26.39   | 28.18   | 51.04   | 128.93   | 51.95    | 110.61   | -1.4661 | 0.00023628 |
| gene:Sme2.5_02028.1_g00011.1 | 134.69  | 176.59  | 140.83  | 528.72   | 313.88   | 404.17   | -1.4636 | 2.71E-11   |
| gene:Sme2.5_15979.1_g00002.1 | 33.67   | 35.69   | 27.41   | 84.51    | 100.66   | 81.66    | -1.4622 | 9.35E-08   |
| gene:Sme2.5_01175.1_g00016.1 | 40.95   | 51.66   | 42.53   | 135.43   | 117.98   | 118.87   | -1.4621 | 4.66E-10   |
| gene:Sme2.5_00162.1_g00022.1 | 1881.16 | 1969.78 | 1797.73 | 5948.09  | 4465.76  | 5147.80  | -1.4620 | 1.72E-30   |
| gene:Sme2.5_16733.1_g00001.1 | 30.94   | 29.12   | 27.41   | 76.92    | 85.51    | 78.56    | -1.4614 | 1.10E-07   |
| gene:Sme2.5_05279.1_g00002.1 | 9.10    | 6.58    | 9.45    | 24.92    | 18.40    | 25.84    | -1.4610 | 0.00401642 |
| gene:Sme2.5_00528.1_g00005.1 | 20.02   | 11.27   | 29.30   | 78.01    | 44.38    | 44.45    | -1.4609 | 0.00066272 |



|                              |        |        |        |         |         |         |         |            |
|------------------------------|--------|--------|--------|---------|---------|---------|---------|------------|
| gene:Sme2.5_00789.1_g00014.1 | 10.01  | 25.36  | 15.12  | 58.51   | 38.96   | 41.35   | -1.4607 | 0.00061943 |
| novel.2409                   | 9.10   | 7.51   | 11.34  | 22.75   | 32.47   | 21.71   | -1.4598 | 0.0029451  |
| gene:Sme2.5_10813.1_g00003.1 | 72.81  | 101.45 | 81.29  | 287.11  | 152.61  | 262.56  | -1.4591 | 5.13E-08   |
| novel.659                    | 8.19   | 15.03  | 9.45   | 32.50   | 24.89   | 32.04   | -1.4550 | 0.00161263 |
| gene:Sme2.5_07263.1_g00001.1 | 59.16  | 62.94  | 67.11  | 107.26  | 252.19  | 159.19  | -1.4549 | 2.61E-06   |
| gene:Sme2.5_00950.1_g00008.1 | 40.95  | 53.54  | 64.27  | 187.44  | 97.41   | 149.89  | -1.4543 | 1.18E-06   |
| gene:Sme2.5_00529.1_g00004.1 | 43.68  | 62.94  | 57.66  | 193.94  | 98.49   | 157.12  | -1.4533 | 8.75E-07   |
| gene:Sme2.5_02450.1_g00004.1 | 111.03 | 263.01 | 172.97 | 446.38  | 513.03  | 537.52  | -1.4530 | 3.64E-08   |
| gene:Sme2.5_06227.1_g00004.1 | 91.01  | 106.14 | 132.33 | 440.96  | 166.68  | 293.57  | -1.4520 | 4.59E-06   |
| novel.1084                   | 30.03  | 59.18  | 40.64  | 69.34   | 162.35  | 123.01  | -1.4508 | 7.13E-05   |
| gene:Sme2.5_01192.1_g00003.1 | 151.99 | 161.56 | 166.35 | 618.64  | 245.69  | 446.56  | -1.4498 | 3.31E-07   |
| gene:Sme2.5_04413.1_g00001.1 | 28.21  | 56.36  | 33.08  | 120.26  | 104.99  | 95.10   | -1.4459 | 1.90E-06   |
| gene:Sme2.5_08812.1_g00001.1 | 125.59 | 152.17 | 160.68 | 600.23  | 220.80  | 373.16  | -1.4457 | 2.60E-06   |
| gene:Sme2.5_05412.1_g00004.1 | 53.70  | 66.69  | 56.71  | 251.36  | 88.75   | 141.62  | -1.4436 | 4.20E-05   |
| gene:Sme2.5_01096.1_g00001.1 | 13.65  | 20.67  | 21.74  | 46.59   | 46.54   | 58.92   | -1.4427 | 6.09E-05   |
| gene:Sme2.5_03895.1_g00002.1 | 107.39 | 164.38 | 133.27 | 522.22  | 239.20  | 339.05  | -1.4422 | 3.26E-07   |
| gene:Sme2.5_00007.1_g00027.1 | 25.48  | 62.00  | 52.93  | 131.10  | 100.66  | 148.85  | -1.4409 | 1.05E-05   |
| gene:Sme2.5_06266.1_g00001.1 | 19.11  | 15.97  | 13.23  | 60.67   | 30.31   | 40.31   | -1.4405 | 0.00057587 |
| novel.48                     | 58.25  | 67.63  | 60.49  | 210.19  | 119.06  | 175.73  | -1.4384 | 2.45E-08   |
| gene:Sme2.5_06087.1_g00001.1 | 15.47  | 15.03  | 12.29  | 35.75   | 34.64   | 45.48   | -1.4376 | 0.00027233 |
| gene:Sme2.5_03872.1_g00005.1 | 422.28 | 933.69 | 648.39 | 2508.17 | 1175.43 | 1744.88 | -1.4374 | 0.00116941 |
| gene:Sme2.5_05864.1_g00001.1 | 107.39 | 85.48  | 80.34  | 321.78  | 179.67  | 237.75  | -1.4352 | 9.12E-09   |
| gene:Sme2.5_07807.1_g00003.1 | 27.30  | 30.06  | 20.79  | 79.09   | 69.27   | 63.06   | -1.4344 | 2.60E-06   |
| gene:Sme2.5_00225.1_g00034.1 | 413.18 | 473.42 | 424.39 | 1547.15 | 834.49  | 1159.81 | -1.4337 | 5.66E-12   |
| gene:Sme2.5_00225.1_g00002.1 | 510.56 | 353.19 | 383.74 | 1409.56 | 858.30  | 1100.88 | -1.4329 | 4.86E-12   |
| gene:Sme2.5_00072.1_g00015.1 | 44.59  | 59.18  | 59.55  | 222.11  | 79.01   | 139.55  | -1.4324 | 5.65E-05   |
| gene:Sme2.5_03270.1_g00005.1 | 12.74  | 25.36  | 14.18  | 56.34   | 44.38   | 40.31   | -1.4324 | 0.00032241 |
| gene:Sme2.5_00228.1_g00005.1 | 31.85  | 41.33  | 34.03  | 143.01  | 48.71   | 97.17   | -1.4304 | 0.00021809 |
| gene:Sme2.5_06091.1_g00004.1 | 51.88  | 51.66  | 65.22  | 238.36  | 76.85   | 139.55  | -1.4303 | 0.00011221 |
| gene:Sme2.5_06435.1_g00002.1 | 19.11  | 16.91  | 21.74  | 47.67   | 51.95   | 55.82   | -1.4290 | 2.48E-05   |

|                              |         |         |         |         |         |         |         |            |
|------------------------------|---------|---------|---------|---------|---------|---------|---------|------------|
| gene:Sme2.5_08163.1_g00005.1 | 8.19    | 9.39    | 6.62    | 28.17   | 19.48   | 17.57   | -1.4287 | 0.00676544 |
| gene:Sme2.5_01832.1_g00008.1 | 43.68   | 39.45   | 27.41   | 124.60  | 84.42   | 88.90   | -1.4285 | 1.36E-06   |
| gene:Sme2.5_01957.1_g00004.1 | 10.01   | 14.09   | 12.29   | 35.75   | 22.73   | 39.28   | -1.4283 | 0.00143476 |
| gene:Sme2.5_12602.1_g00002.1 | 71.90   | 81.72   | 66.16   | 254.61  | 139.62  | 195.37  | -1.4236 | 2.84E-08   |
| gene:Sme2.5_08341.1_g00002.1 | 43.68   | 31.94   | 34.03   | 136.51  | 60.61   | 97.17   | -1.4234 | 3.41E-05   |
| gene:Sme2.5_00474.1_g00002.1 | 11.83   | 21.60   | 17.96   | 36.84   | 54.12   | 46.52   | -1.4217 | 0.00025329 |
| gene:Sme2.5_02330.1_g00002.1 | 168.37  | 143.72  | 167.30  | 521.14  | 304.14  | 456.89  | -1.4193 | 4.21E-11   |
| gene:Sme2.5_00173.1_g00018.1 | 10.92   | 10.33   | 9.45    | 39.00   | 17.32   | 25.84   | -1.4191 | 0.00475814 |
| novel.601                    | 29.12   | 48.85   | 43.48   | 159.27  | 61.69   | 103.37  | -1.4180 | 0.00014051 |
| gene:Sme2.5_10211.1_g00002.1 | 213.87  | 498.78  | 285.44  | 1013.02 | 740.33  | 912.75  | -1.4177 | 1.30E-07   |
| gene:Sme2.5_03745.1_g00001.1 | 757.19  | 871.70  | 780.72  | 2719.44 | 1686.30 | 2030.18 | -1.4174 | 1.03E-15   |
| gene:Sme2.5_01135.1_g00011.1 | 452.31  | 712.01  | 591.68  | 2177.72 | 1009.83 | 1497.82 | -1.4160 | 3.88E-08   |
| gene:Sme2.5_03522.1_g00003.1 | 19.11   | 18.79   | 28.36   | 67.17   | 36.80   | 72.36   | -1.4142 | 0.0002395  |
| gene:Sme2.5_01292.1_g00003.1 | 990.18  | 1187.31 | 1091.68 | 4013.07 | 1768.55 | 2926.39 | -1.4134 | 5.43E-09   |
| gene:Sme2.5_03378.1_g00005.1 | 20.02   | 27.24   | 23.63   | 92.09   | 33.55   | 63.06   | -1.4131 | 0.00063127 |
| gene:Sme2.5_00676.1_g00006.1 | 11.83   | 11.27   | 11.34   | 41.17   | 18.40   | 32.04   | -1.4113 | 0.0031999  |
| novel.2340                   | 37.31   | 42.27   | 36.86   | 96.43   | 120.14  | 93.03   | -1.4104 | 3.75E-08   |
| gene:Sme2.5_11042.1_g00002.1 | 16.38   | 23.48   | 7.56    | 44.42   | 48.71   | 33.08   | -1.4103 | 0.00167196 |
| gene:Sme2.5_15698.1_g00002.1 | 238.44  | 256.44  | 265.60  | 611.06  | 704.61  | 694.64  | -1.4029 | 4.20E-27   |
| gene:Sme2.5_00132.1_g00013.1 | 82.82   | 99.57   | 99.24   | 234.02  | 254.35  | 255.32  | -1.4018 | 1.11E-15   |
| gene:Sme2.5_08612.1_g00002.1 | 51.88   | 34.76   | 44.42   | 114.84  | 99.58   | 131.28  | -1.3989 | 6.27E-08   |
| gene:Sme2.5_02758.1_g00003.1 | 278.49  | 365.40  | 296.79  | 1139.78 | 527.10  | 812.48  | -1.3983 | 2.36E-08   |
| gene:Sme2.5_05731.1_g00002.1 | 50.97   | 36.63   | 44.42   | 139.76  | 106.07  | 102.34  | -1.3975 | 7.93E-08   |
| gene:Sme2.5_12727.1_g00002.1 | 7.28    | 16.91   | 6.62    | 29.25   | 25.98   | 25.84   | -1.3972 | 0.0059068  |
| gene:Sme2.5_08784.1_g00001.1 | 12.74   | 17.85   | 16.07   | 37.92   | 48.71   | 36.18   | -1.3969 | 0.00030533 |
| gene:Sme2.5_00268.1_g00013.1 | 79.18   | 47.91   | 80.34   | 260.03  | 106.07  | 179.86  | -1.3959 | 3.48E-05   |
| gene:Sme2.5_01113.1_g00010.1 | 20.02   | 16.91   | 19.85   | 33.59   | 69.27   | 46.52   | -1.3949 | 0.00041768 |
| gene:Sme2.5_08337.1_g00002.1 | 16.38   | 12.21   | 17.96   | 40.09   | 35.72   | 46.52   | -1.3945 | 0.00029926 |
| gene:Sme2.5_00041.1_g00005.1 | 1340.56 | 1721.79 | 1504.73 | 4722.72 | 3292.50 | 3971.46 | -1.3921 | 1.31E-18   |
| gene:Sme2.5_00100.1_g00006.1 | 10.01   | 11.27   | 7.56    | 24.92   | 22.73   | 27.91   | -1.3894 | 0.0035124  |

|                              |        |        |        |         |         |         |         |            |
|------------------------------|--------|--------|--------|---------|---------|---------|---------|------------|
| gene:Sme2.5_00027.1_g00021.1 | 246.63 | 202.90 | 229.68 | 827.75  | 360.42  | 591.27  | -1.3894 | 1.16E-07   |
| gene:Sme2.5_00162.1_g00020.1 | 758.10 | 888.61 | 801.51 | 2607.84 | 1815.10 | 1987.80 | -1.3888 | 7.08E-19   |
| gene:Sme2.5_01569.1_g00008.1 | 67.35  | 75.15  | 61.44  | 265.44  | 96.33   | 171.59  | -1.3869 | 3.60E-05   |
| gene:Sme2.5_00043.1_g00011.1 | 24.57  | 24.42  | 27.41  | 97.51   | 42.21   | 59.95   | -1.3857 | 0.00024874 |
| gene:Sme2.5_18722.1_g00001.1 | 220.24 | 273.35 | 247.64 | 768.16  | 484.89  | 683.27  | -1.3856 | 5.89E-13   |
| novel.1259                   | 19.11  | 24.42  | 19.85  | 80.17   | 31.39   | 53.75   | -1.3833 | 0.00083809 |
| gene:Sme2.5_01116.1_g00007.1 | 718.06 | 624.66 | 699.43 | 1785.51 | 1694.96 | 1843.08 | -1.3822 | 6.87E-39   |
| gene:Sme2.5_00151.1_g00002.1 | 72.81  | 101.45 | 104.91 | 292.53  | 208.89  | 225.35  | -1.3811 | 4.05E-10   |
| gene:Sme2.5_00653.1_g00018.1 | 111.03 | 123.99 | 129.49 | 319.62  | 285.74  | 343.19  | -1.3806 | 5.77E-17   |
| gene:Sme2.5_00590.1_g00004.1 | 779.95 | 844.46 | 798.68 | 2633.84 | 1569.40 | 2101.50 | -1.3796 | 1.71E-14   |
| gene:Sme2.5_08450.1_g00003.1 | 11.83  | 15.97  | 25.52  | 61.76   | 27.06   | 49.62   | -1.3788 | 0.00230147 |
| gene:Sme2.5_04205.1_g00002.1 | 222.06 | 278.04 | 254.25 | 765.99  | 543.34  | 649.16  | -1.3767 | 5.10E-16   |
| gene:Sme2.5_11135.1_g00001.1 | 71.90  | 62.94  | 69.00  | 159.27  | 182.92  | 187.10  | -1.3766 | 4.19E-12   |
| gene:Sme2.5_05566.1_g00010.1 | 162.00 | 195.38 | 188.09 | 691.24  | 254.35  | 469.30  | -1.3752 | 4.14E-06   |
| gene:Sme2.5_00661.1_g00012.1 | 23.66  | 20.67  | 35.92  | 95.34   | 46.54   | 66.16   | -1.3751 | 0.00025816 |
| gene:Sme2.5_29581.1_g00001.1 | 127.41 | 94.87  | 105.86 | 312.03  | 250.02  | 288.40  | -1.3731 | 1.66E-13   |
| gene:Sme2.5_14020.1_g00001.1 | 10.01  | 8.45   | 6.62   | 21.67   | 21.65   | 21.71   | -1.3725 | 0.00670807 |
| gene:Sme2.5_03531.1_g00002.1 | 239.35 | 334.40 | 255.20 | 932.84  | 482.73  | 729.79  | -1.3720 | 7.91E-09   |
| gene:Sme2.5_00850.1_g00014.1 | 6.37   | 9.39   | 5.67   | 19.50   | 17.32   | 18.61   | -1.3712 | 0.01287807 |
| gene:Sme2.5_18566.1_g00002.1 | 260.29 | 251.74 | 272.21 | 1019.52 | 301.97  | 706.01  | -1.3704 | 0.00485014 |
| gene:Sme2.5_07998.1_g00002.1 | 36.40  | 15.97  | 34.03  | 83.42   | 56.28   | 83.73   | -1.3701 | 0.00015033 |
| gene:Sme2.5_00755.1_g00003.1 | 217.51 | 294.01 | 249.53 | 668.48  | 590.96  | 702.91  | -1.3671 | 9.80E-19   |
| gene:Sme2.5_02073.1_g00002.1 | 242.08 | 135.26 | 187.15 | 592.64  | 362.59  | 501.34  | -1.3671 | 2.19E-08   |
| gene:Sme2.5_00065.1_g00016.1 | 24.57  | 26.30  | 25.52  | 55.26   | 70.35   | 71.32   | -1.3670 | 7.43E-06   |
| gene:Sme2.5_09590.1_g00001.1 | 25.48  | 42.27  | 21.74  | 78.01   | 59.53   | 93.03   | -1.3667 | 6.96E-05   |
| gene:Sme2.5_00326.1_g00001.1 | 16.38  | 23.48  | 26.47  | 71.51   | 48.71   | 50.65   | -1.3664 | 0.00011014 |
| gene:Sme2.5_01424.1_g00005.1 | 13.65  | 29.12  | 27.41  | 81.26   | 45.46   | 53.75   | -1.3644 | 0.00054268 |
| gene:Sme2.5_00019.1_g00021.1 | 136.51 | 159.69 | 132.33 | 516.80  | 227.29  | 356.62  | -1.3610 | 5.69E-07   |
| gene:Sme2.5_02389.1_g00010.1 | 340.37 | 404.85 | 363.89 | 1386.80 | 574.73  | 884.84  | -1.3597 | 2.81E-07   |
| gene:Sme2.5_03870.1_g00006.1 | 609.76 | 758.04 | 696.60 | 2104.04 | 1256.60 | 1927.84 | -1.3573 | 2.01E-12   |

|                              |          |         |         |          |          |          |         |            |
|------------------------------|----------|---------|---------|----------|----------|----------|---------|------------|
| gene:Sme2.5_00924.1_g00005.1 | 125.59   | 176.59  | 150.28  | 589.39   | 173.18   | 394.87   | -1.3552 | 0.00011037 |
| gene:Sme2.5_01531.1_g00005.1 | 151.99   | 223.56  | 118.15  | 616.48   | 257.60   | 388.67   | -1.3548 | 1.81E-05   |
| gene:Sme2.5_02154.1_g00001.1 | 208.41   | 341.92  | 267.49  | 949.09   | 454.59   | 685.34   | -1.3532 | 3.31E-07   |
| gene:Sme2.5_30568.1_g00001.1 | 820.90   | 958.12  | 934.78  | 2663.10  | 1928.74  | 2340.29  | -1.3531 | 7.11E-21   |
| gene:Sme2.5_01874.1_g00005.1 | 33.67    | 48.85   | 38.75   | 126.76   | 83.34    | 99.23    | -1.3516 | 1.61E-06   |
| gene:Sme2.5_08083.1_g00003.1 | 81.00    | 68.57   | 49.15   | 211.27   | 127.72   | 168.49   | -1.3516 | 5.50E-07   |
| gene:Sme2.5_00072.1_g00009.1 | 11.83    | 12.21   | 19.85   | 47.67    | 24.89    | 39.28    | -1.3513 | 0.00229034 |
| gene:Sme2.5_04098.1_g00003.1 | 39.13    | 50.72   | 50.09   | 162.52   | 81.18    | 112.67   | -1.3490 | 1.05E-05   |
| gene:Sme2.5_01439.1_g00003.1 | 12096.00 | 6245.61 | 9274.11 | 28249.64 | 19148.88 | 22937.69 | -1.3488 | 1.76E-09   |
| gene:Sme2.5_05179.1_g00005.1 | 30.03    | 40.39   | 30.25   | 98.59    | 79.01    | 78.56    | -1.3475 | 1.61E-06   |
| gene:Sme2.5_33265.1_g00001.1 | 10.92    | 19.73   | 18.90   | 36.84    | 48.71    | 40.31    | -1.3471 | 0.00061658 |
| gene:Sme2.5_00720.1_g00013.1 | 765.39   | 1020.11 | 928.17  | 3151.73  | 1286.91  | 2459.16  | -1.3460 | 3.82E-07   |
| gene:Sme2.5_02456.1_g00003.1 | 12.74    | 12.21   | 34.97   | 84.51    | 34.64    | 33.08    | -1.3457 | 0.01217535 |
| novel.1577                   | 34.58    | 34.76   | 37.81   | 133.26   | 51.95    | 86.83    | -1.3443 | 0.00020334 |
| gene:Sme2.5_04789.1_g00001.1 | 272.12   | 336.28  | 341.21  | 987.01   | 620.18   | 803.18   | -1.3441 | 1.50E-12   |
| gene:Sme2.5_06598.1_g00004.1 | 45.50    | 74.21   | 57.66   | 224.27   | 88.75    | 136.45   | -1.3419 | 0.00011159 |
| gene:Sme2.5_02795.1_g00001.1 | 11.83    | 10.33   | 5.67    | 26.00    | 29.22    | 15.51    | -1.3412 | 0.01173777 |
| gene:Sme2.5_00671.1_g00010.1 | 3.64     | 21.60   | 17.01   | 41.17    | 34.64    | 31.01    | -1.3409 | 0.01265393 |
| gene:Sme2.5_00488.1_g00021.1 | 12.74    | 10.33   | 7.56    | 28.17    | 19.48    | 29.98    | -1.3403 | 0.00565946 |
| gene:Sme2.5_02292.1_g00001.1 | 27.30    | 24.42   | 30.25   | 110.51   | 38.96    | 57.89    | -1.3385 | 0.00119677 |
| gene:Sme2.5_09104.1_g00004.1 | 80.09    | 114.60  | 112.48  | 325.03   | 199.15   | 252.22   | -1.3385 | 1.79E-08   |
| gene:Sme2.5_01765.1_g00008.1 | 15.47    | 49.78   | 31.19   | 88.84    | 82.26    | 72.36    | -1.3375 | 0.0004557  |
| gene:Sme2.5_04599.1_g00002.1 | 10.92    | 23.48   | 25.52   | 57.42    | 36.80    | 56.85    | -1.3373 | 0.00104221 |
| gene:Sme2.5_16832.1_g00001.1 | 1806.53  | 1850.48 | 1905.48 | 5211.35  | 4106.42  | 4729.15  | -1.3365 | 4.48E-31   |
| gene:Sme2.5_02584.1_g00007.1 | 567.90   | 799.37  | 666.35  | 1912.27  | 1575.90  | 1629.10  | -1.3315 | 3.34E-18   |
| gene:Sme2.5_09700.1_g00002.1 | 55.52    | 95.81   | 72.78   | 162.52   | 214.30   | 186.07   | -1.3297 | 3.86E-08   |
| gene:Sme2.5_00748.1_g00005.1 | 92.83    | 158.75  | 138.00  | 497.30   | 196.99   | 282.20   | -1.3260 | 4.28E-05   |
| gene:Sme2.5_00096.1_g00007.1 | 149.25   | 125.87  | 139.89  | 336.95   | 329.03   | 374.20   | -1.3256 | 2.02E-17   |
| gene:Sme2.5_02152.1_g00001.1 | 31.85    | 32.88   | 31.19   | 89.93    | 85.51    | 65.12    | -1.3253 | 3.00E-06   |
| novel.1710                   | 19.11    | 23.48   | 19.85   | 50.92    | 41.13    | 64.09    | -1.3240 | 0.00016846 |

|                              |         |         |         |          |          |          |         |            |
|------------------------------|---------|---------|---------|----------|----------|----------|---------|------------|
| gene:Sme2.5_05567.1_g00005.1 | 768.12  | 1185.44 | 1021.74 | 3304.49  | 1700.37  | 2440.55  | -1.3234 | 1.68E-08   |
| gene:Sme2.5_01883.1_g00007.1 | 98.29   | 123.99  | 150.28  | 418.21   | 196.99   | 316.31   | -1.3226 | 2.06E-06   |
| gene:Sme2.5_00007.1_g00005.1 | 107.39  | 170.02  | 136.11  | 388.96   | 280.33   | 363.86   | -1.3218 | 5.92E-10   |
| gene:Sme2.5_05774.1_g00003.1 | 861.86  | 903.64  | 845.94  | 2914.46  | 1446.02  | 2165.59  | -1.3214 | 1.06E-09   |
| novel.3167                   | 484.17  | 430.21  | 488.66  | 1316.38  | 1035.81  | 1152.57  | -1.3207 | 4.24E-23   |
| gene:Sme2.5_02575.1_g00004.1 | 37.31   | 46.97   | 53.88   | 78.01    | 135.29   | 131.28   | -1.3201 | 8.11E-06   |
| gene:Sme2.5_03412.1_g00008.1 | 38.22   | 37.57   | 41.59   | 162.52   | 29.22    | 101.30   | -1.3200 | 0.00657088 |
| gene:Sme2.5_08420.1_g00002.1 | 3513.86 | 4510.67 | 4005.67 | 12002.36 | 8137.08  | 9824.24  | -1.3166 | 2.99E-16   |
| gene:Sme2.5_01787.1_g00004.1 | 10.92   | 12.21   | 12.29   | 35.75    | 14.07    | 38.25    | -1.3160 | 0.01002796 |
| gene:Sme2.5_00187.1_g00006.1 | 37.31   | 52.60   | 63.33   | 200.44   | 83.34    | 97.17    | -1.3141 | 0.00034343 |
| gene:Sme2.5_02147.1_g00005.1 | 42.77   | 67.63   | 58.60   | 144.10   | 130.96   | 144.72   | -1.3141 | 2.38E-08   |
| gene:Sme2.5_00019.1_g00007.1 | 23.66   | 33.82   | 20.79   | 69.34    | 43.29    | 81.66    | -1.3131 | 0.00030333 |
| gene:Sme2.5_03374.1_g00002.1 | 67.35   | 114.60  | 103.97  | 232.94   | 222.96   | 253.26   | -1.3120 | 2.35E-09   |
| gene:Sme2.5_02263.1_g00003.1 | 150.16  | 208.53  | 221.17  | 603.48   | 383.15   | 451.72   | -1.3110 | 1.47E-09   |
| novel.1050                   | 33.67   | 41.33   | 34.97   | 119.18   | 58.45    | 95.10    | -1.3107 | 5.35E-05   |
| gene:Sme2.5_00066.1_g00013.1 | 4736.11 | 6839.27 | 5434.78 | 13830.12 | 14077.00 | 14260.85 | -1.3098 | 1.69E-20   |
| novel.920                    | 24.57   | 50.72   | 34.97   | 79.09    | 101.74   | 92.00    | -1.3087 | 2.55E-05   |
| gene:Sme2.5_09773.1_g00004.1 | 15.47   | 13.15   | 11.34   | 43.34    | 19.48    | 36.18    | -1.3080 | 0.00480762 |
| gene:Sme2.5_10131.1_g00002.1 | 11.83   | 12.21   | 9.45    | 27.09    | 21.65    | 34.11    | -1.3074 | 0.00451647 |
| gene:Sme2.5_04098.1_g00001.1 | 20.93   | 11.27   | 11.34   | 55.26    | 20.56    | 32.04    | -1.3058 | 0.00951642 |
| gene:Sme2.5_02562.1_g00005.1 | 228.43  | 315.62  | 285.44  | 858.09   | 472.99   | 716.35   | -1.3038 | 6.36E-09   |
| gene:Sme2.5_00217.1_g00002.1 | 127.41  | 125.87  | 82.23   | 341.28   | 211.06   | 276.00   | -1.3033 | 8.34E-08   |
| gene:Sme2.5_25082.1_g00001.1 | 9.10    | 16.91   | 19.85   | 23.84    | 50.87    | 38.25    | -1.3031 | 0.0050728  |
| gene:Sme2.5_00726.1_g00015.1 | 1367.87 | 1657.92 | 1452.74 | 4405.27  | 2960.22  | 3683.05  | -1.3028 | 3.06E-16   |
| gene:Sme2.5_00209.1_g00001.1 | 240.26  | 205.71  | 210.78  | 608.89   | 424.28   | 587.14   | -1.3027 | 1.95E-13   |
| gene:Sme2.5_02208.1_g00006.1 | 239.35  | 307.16  | 305.29  | 881.92   | 536.84   | 680.17   | -1.3013 | 9.75E-11   |
| gene:Sme2.5_05726.1_g00002.1 | 23.66   | 40.39   | 26.47   | 55.26    | 66.02    | 101.30   | -1.3004 | 0.00025671 |
| gene:Sme2.5_14818.1_g00002.1 | 287.59  | 292.13  | 235.35  | 640.31   | 674.30   | 692.58   | -1.3000 | 6.54E-22   |
| gene:Sme2.5_01254.1_g00003.1 | 10.01   | 15.03   | 17.01   | 43.34    | 24.89    | 35.15    | -1.2998 | 0.00300836 |
| gene:Sme2.5_06504.1_g00002.1 | 13.65   | 42.27   | 27.41   | 70.42    | 64.94    | 69.26    | -1.2983 | 0.0007131  |

|                              |         |         |         |         |         |         |         |            |
|------------------------------|---------|---------|---------|---------|---------|---------|---------|------------|
| novel. 497                   | 9.10    | 13.15   | 7.56    | 24.92   | 16.24   | 32.04   | -1.2979 | 0.01181594 |
| novel. 1257                  | 27.30   | 25.36   | 13.23   | 68.26   | 43.29   | 50.65   | -1.2974 | 0.00070071 |
| gene:Sme2.5_02635.1_g00007.1 | 26.39   | 42.27   | 35.92   | 98.59   | 68.19   | 89.93   | -1.2972 | 1.39E-05   |
| gene:Sme2.5_12058.1_g00002.1 | 54.61   | 71.39   | 61.44   | 249.19  | 54.12   | 157.12  | -1.2968 | 0.00270731 |
| gene:Sme2.5_03408.1_g00003.1 | 130.14  | 151.23  | 140.83  | 453.96  | 203.48  | 379.37  | -1.2964 | 1.58E-06   |
| gene:Sme2.5_01380.1_g00009.1 | 116.49  | 123.99  | 106.81  | 284.94  | 308.47  | 259.46  | -1.2957 | 9.37E-15   |
| gene:Sme2.5_02039.1_g00003.1 | 81.91   | 10.33   | 42.53   | 111.59  | 114.73  | 104.40  | -1.2937 | 0.01039248 |
| gene:Sme2.5_10877.1_g00002.1 | 15.47   | 35.69   | 32.14   | 74.76   | 66.02   | 63.06   | -1.2932 | 0.00020586 |
| gene:Sme2.5_03583.1_g00007.1 | 98.29   | 102.39  | 110.59  | 344.53  | 166.68  | 251.19  | -1.2926 | 8.12E-07   |
| gene:Sme2.5_00461.1_g00010.1 | 236.62  | 282.74  | 273.16  | 787.66  | 471.90  | 680.17  | -1.2916 | 8.54E-11   |
| gene:Sme2.5_07863.1_g00004.1 | 20.93   | 20.67   | 20.79   | 71.51   | 37.88   | 43.42   | -1.2914 | 0.00067106 |
| gene:Sme2.5_00128.1_g00008.1 | 17.29   | 8.45    | 16.07   | 49.84   | 19.48   | 33.08   | -1.2909 | 0.00960349 |
| gene:Sme2.5_09565.1_g00001.1 | 244.81  | 288.37  | 285.44  | 846.17  | 478.40  | 678.10  | -1.2908 | 5.47E-10   |
| gene:Sme2.5_07116.1_g00002.1 | 681.66  | 818.16  | 660.68  | 2507.08 | 936.23  | 1830.67 | -1.2876 | 3.95E-06   |
| gene:Sme2.5_01512.1_g00014.1 | 82.82   | 150.29  | 113.42  | 331.53  | 239.20  | 273.93  | -1.2861 | 7.16E-08   |
| gene:Sme2.5_06288.1_g00002.1 | 95.56   | 92.99   | 116.26  | 333.70  | 162.35  | 246.02  | -1.2838 | 1.54E-06   |
| gene:Sme2.5_06195.1_g00007.1 | 20.93   | 16.91   | 27.41   | 55.26   | 47.62   | 55.82   | -1.2832 | 0.00016697 |
| novel. 1634                  | 27.30   | 38.51   | 39.70   | 97.51   | 80.09   | 78.56   | -1.2808 | 5.09E-06   |
| gene:Sme2.5_04007.1_g00005.1 | 22.75   | 19.73   | 18.90   | 48.75   | 49.79   | 50.65   | -1.2805 | 0.00012208 |
| novel. 1787                  | 11.83   | 6.58    | 14.18   | 34.67   | 23.81   | 20.67   | -1.2791 | 0.01031213 |
| gene:Sme2.5_00001.1_g00048.1 | 1043.87 | 620.90  | 805.29  | 2636.01 | 1262.02 | 2087.03 | -1.2767 | 7.20E-07   |
| gene:Sme2.5_01547.1_g00011.1 | 14.56   | 19.73   | 22.68   | 74.76   | 23.81   | 39.28   | -1.2754 | 0.00743992 |
| gene:Sme2.5_00777.1_g00001.1 | 32.76   | 28.18   | 29.30   | 102.93  | 41.13   | 74.43   | -1.2753 | 0.00064846 |
| gene:Sme2.5_03277.1_g00006.1 | 41.86   | 63.87   | 67.11   | 138.68  | 126.63  | 151.95  | -1.2735 | 1.78E-07   |
| gene:Sme2.5_00556.1_g00007.1 | 8.19    | 13.15   | 18.90   | 41.17   | 23.81   | 32.04   | -1.2723 | 0.00654535 |
| gene:Sme2.5_00193.1_g00013.1 | 177.47  | 190.68  | 182.42  | 588.31  | 291.15  | 449.66  | -1.2715 | 9.97E-08   |
| gene:Sme2.5_16832.1_g00002.1 | 220.24  | 164.38  | 186.20  | 514.63  | 419.95  | 443.46  | -1.2708 | 1.76E-14   |
| gene:Sme2.5_03422.1_g00005.1 | 19.11   | 12.21   | 23.63   | 72.59   | 23.81   | 36.18   | -1.2700 | 0.00993593 |
| gene:Sme2.5_00747.1_g00009.1 | 1923.93 | 1866.45 | 1938.56 | 6226.54 | 2885.54 | 4699.18 | -1.2695 | 2.12E-08   |
| novel. 813                   | 10.01   | 13.15   | 10.40   | 21.67   | 27.06   | 32.04   | -1.2691 | 0.00570138 |

|                              |         |         |         |         |         |         |         |            |
|------------------------------|---------|---------|---------|---------|---------|---------|---------|------------|
| gene:Sme2.5_15009.1_g00001.1 | 63.71   | 57.30   | 55.77   | 161.43  | 142.87  | 120.94  | -1.2651 | 1.56E-08   |
| gene:Sme2.5_01703.1_g00002.1 | 34.58   | 20.67   | 17.96   | 56.34   | 70.35   | 49.62   | -1.2647 | 0.00044024 |
| gene:Sme2.5_00283.1_g00002.1 | 10.01   | 13.15   | 14.18   | 35.75   | 22.73   | 31.01   | -1.2629 | 0.00450928 |
| gene:Sme2.5_00551.1_g00008.1 | 139.24  | 196.32  | 199.43  | 580.72  | 242.45  | 457.93  | -1.2601 | 1.38E-05   |
| gene:Sme2.5_02680.1_g00006.1 | 139.24  | 166.26  | 132.33  | 339.12  | 344.19  | 364.89  | -1.2598 | 1.01E-15   |
| gene:Sme2.5_01636.1_g00003.1 | 294.87  | 410.49  | 348.77  | 1158.20 | 531.43  | 831.09  | -1.2579 | 7.33E-07   |
| gene:Sme2.5_07604.1_g00005.1 | 30.94   | 31.94   | 28.36   | 87.76   | 47.62   | 82.70   | -1.2576 | 0.00014192 |
| gene:Sme2.5_04898.1_g00002.1 | 20.93   | 31.94   | 33.08   | 95.34   | 57.36   | 52.72   | -1.2575 | 0.00044347 |
| gene:Sme2.5_02180.1_g00001.1 | 8.19    | 13.15   | 8.51    | 26.00   | 17.32   | 27.91   | -1.2570 | 0.01216931 |
| gene:Sme2.5_00512.1_g00006.1 | 188.39  | 142.78  | 155.95  | 543.89  | 237.03  | 382.47  | -1.2557 | 5.09E-06   |
| gene:Sme2.5_00113.1_g00004.1 | 39.13   | 37.57   | 42.53   | 126.76  | 60.61   | 97.17   | -1.2550 | 8.79E-05   |
| gene:Sme2.5_00166.1_g00017.1 | 42.77   | 34.76   | 34.97   | 86.68   | 85.51   | 96.13   | -1.2534 | 1.28E-06   |
| gene:Sme2.5_00323.1_g00016.1 | 590.65  | 214.17  | 441.40  | 1257.87 | 783.62  | 928.26  | -1.2527 | 0.00564829 |
| gene:Sme2.5_10797.1_g00001.1 | 134.69  | 175.65  | 166.35  | 491.88  | 273.83  | 369.03  | -1.2515 | 5.42E-08   |
| gene:Sme2.5_04119.1_g00001.1 | 21.84   | 23.48   | 25.52   | 48.75   | 68.19   | 51.68   | -1.2512 | 0.00014018 |
| gene:Sme2.5_00701.1_g00012.1 | 25.48   | 64.81   | 58.60   | 160.35  | 75.76   | 117.84  | -1.2506 | 0.0010411  |
| gene:Sme2.5_02214.1_g00002.1 | 459.60  | 679.14  | 550.09  | 1736.76 | 994.68  | 1284.88 | -1.2500 | 7.12E-09   |
| gene:Sme2.5_03432.1_g00006.1 | 19.11   | 11.27   | 21.74   | 60.67   | 27.06   | 36.18   | -1.2485 | 0.00578157 |
| gene:Sme2.5_00844.1_g00008.1 | 44.59   | 49.78   | 61.44   | 173.35  | 100.66  | 96.13   | -1.2482 | 3.36E-05   |
| novel.2400                   | 458.69  | 274.28  | 352.55  | 813.66  | 888.61  | 875.54  | -1.2474 | 1.01E-11   |
| gene:Sme2.5_05142.1_g00002.1 | 2637.44 | 3239.75 | 2841.21 | 8806.21 | 4921.43 | 6935.06 | -1.2449 | 1.61E-10   |
| gene:Sme2.5_02233.1_g00008.1 | 57.34   | 72.33   | 56.71   | 182.02  | 90.92   | 168.49  | -1.2446 | 2.44E-05   |
| gene:Sme2.5_08916.1_g00006.1 | 11.83   | 21.60   | 9.45    | 46.59   | 23.81   | 31.01   | -1.2417 | 0.00980968 |
| gene:Sme2.5_07193.1_g00001.1 | 53.70   | 103.33  | 76.56   | 247.02  | 112.56  | 192.27  | -1.2411 | 0.00014156 |
| gene:Sme2.5_26907.1_g00001.1 | 1852.03 | 1211.74 | 1710.78 | 5188.60 | 2340.03 | 3753.35 | -1.2406 | 1.22E-06   |
| gene:Sme2.5_00173.1_g00006.1 | 23.66   | 30.06   | 26.47   | 70.42   | 61.69   | 56.85   | -1.2369 | 4.85E-05   |
| gene:Sme2.5_26607.1_g00001.1 | 49.14   | 56.36   | 55.77   | 192.85  | 71.43   | 115.77  | -1.2368 | 0.00037727 |
| gene:Sme2.5_02558.1_g00002.1 | 200.22  | 257.38  | 234.40  | 696.65  | 442.68  | 489.97  | -1.2355 | 7.62E-10   |
| gene:Sme2.5_01723.1_g00006.1 | 11.83   | 31.00   | 17.96   | 46.59   | 50.87   | 45.48   | -1.2355 | 0.0021098  |
| gene:Sme2.5_00943.1_g00002.1 | 59.16   | 92.05   | 80.34   | 198.27  | 165.60  | 179.86  | -1.2327 | 2.05E-08   |

|                              |         |         |         |         |         |         |         |            |
|------------------------------|---------|---------|---------|---------|---------|---------|---------|------------|
| gene:Sme2.5_00075.1_g00006.1 | 1078.46 | 2361.48 | 1607.75 | 4019.57 | 4080.45 | 3761.62 | -1.2327 | 8.62E-08   |
| gene:Sme2.5_18566.1_g00001.1 | 134.69  | 130.57  | 105.86  | 424.71  | 134.21  | 313.21  | -1.2326 | 0.00030991 |
| gene:Sme2.5_02415.1_g00001.1 | 21.84   | 14.09   | 18.90   | 47.67   | 34.64   | 46.52   | -1.2314 | 0.00105963 |
| gene:Sme2.5_07422.1_g00002.1 | 9.10    | 14.09   | 10.40   | 24.92   | 22.73   | 31.01   | -1.2302 | 0.00797069 |
| gene:Sme2.5_00323.1_g00013.1 | 1326.91 | 503.48  | 996.22  | 2723.77 | 1711.19 | 2193.50 | -1.2296 | 0.00464537 |
| gene:Sme2.5_10334.1_g00003.1 | 30.94   | 27.24   | 20.79   | 62.84   | 51.95   | 70.29   | -1.2281 | 0.0001251  |
| gene:Sme2.5_00081.1_g00003.1 | 274.85  | 326.89  | 276.94  | 963.18  | 469.74  | 625.39  | -1.2280 | 3.22E-07   |
| gene:Sme2.5_00005.1_g00019.1 | 31.85   | 28.18   | 42.53   | 78.01   | 86.59   | 75.46   | -1.2272 | 1.38E-05   |
| novel.3222                   | 38.22   | 63.87   | 56.71   | 107.26  | 147.20  | 116.81  | -1.2263 | 4.44E-06   |
| gene:Sme2.5_04131.1_g00003.1 | 573.36  | 820.04  | 741.02  | 2166.88 | 1189.50 | 1626.00 | -1.2231 | 1.98E-08   |
| gene:Sme2.5_01098.1_g00009.1 | 48.23   | 53.54   | 38.75   | 109.43  | 101.74  | 116.81  | -1.2227 | 4.60E-07   |
| novel.185                    | 22.75   | 32.88   | 22.68   | 92.09   | 35.72   | 54.79   | -1.2214 | 0.00290091 |
| gene:Sme2.5_03645.1_g00003.1 | 56.43   | 75.15   | 75.61   | 192.85  | 133.13  | 156.09  | -1.2191 | 2.16E-07   |
| gene:Sme2.5_00076.1_g00017.1 | 156.54  | 132.45  | 145.56  | 397.62  | 277.08  | 336.98  | -1.2189 | 4.68E-11   |
| gene:Sme2.5_02377.1_g00008.1 | 158.36  | 170.02  | 132.33  | 431.21  | 251.10  | 389.70  | -1.2184 | 6.03E-08   |
| gene:Sme2.5_00432.1_g00009.1 | 17.29   | 15.97   | 38.75   | 52.01   | 56.28   | 58.92   | -1.2175 | 0.00198277 |
| gene:Sme2.5_00252.1_g00003.1 | 11.83   | 17.85   | 19.85   | 48.75   | 23.81   | 42.38   | -1.2170 | 0.00530065 |
| gene:Sme2.5_05756.1_g00003.1 | 23.66   | 21.60   | 20.79   | 59.59   | 46.54   | 47.55   | -1.2170 | 0.00025777 |
| gene:Sme2.5_01701.1_g00008.1 | 21.84   | 23.48   | 16.07   | 50.92   | 41.13   | 50.65   | -1.2165 | 0.00051785 |
| gene:Sme2.5_02348.1_g00008.1 | 30.03   | 47.91   | 52.93   | 134.35  | 63.86   | 105.44  | -1.2156 | 0.00040316 |
| gene:Sme2.5_00239.1_g00015.1 | 96.47   | 92.05   | 83.18   | 235.11  | 180.75  | 213.97  | -1.2126 | 3.07E-10   |
| gene:Sme2.5_01775.1_g00002.1 | 258.47  | 273.35  | 251.42  | 812.58  | 384.23  | 618.15  | -1.2125 | 4.77E-07   |
| gene:Sme2.5_00011.1_g00013.1 | 42.77   | 56.36   | 82.23   | 166.85  | 109.32  | 143.68  | -1.2124 | 2.67E-05   |
| gene:Sme2.5_01830.1_g00008.1 | 13.65   | 39.45   | 34.03   | 92.09   | 44.38   | 65.12   | -1.2120 | 0.00479697 |
| gene:Sme2.5_14501.1_g00003.1 | 191.12  | 229.20  | 178.64  | 540.64  | 387.48  | 458.96  | -1.2116 | 1.07E-11   |
| gene:Sme2.5_01531.1_g00008.1 | 1904.82 | 2361.48 | 2088.85 | 6763.92 | 3022.99 | 4919.35 | -1.2105 | 4.13E-07   |
| gene:Sme2.5_01860.1_g00007.1 | 57.34   | 61.06   | 45.37   | 134.35  | 126.63  | 117.84  | -1.2090 | 1.09E-07   |
| gene:Sme2.5_00310.1_g00016.1 | 314.89  | 550.45  | 417.77  | 1234.04 | 741.41  | 990.28  | -1.2090 | 2.03E-07   |
| gene:Sme2.5_05820.1_g00003.1 | 21.84   | 27.24   | 30.25   | 92.09   | 37.88   | 52.72   | -1.2039 | 0.00243777 |
| gene:Sme2.5_01236.1_g00004.1 | 162.00  | 184.11  | 181.47  | 481.05  | 316.05  | 416.58  | -1.2022 | 1.66E-10   |



|                              |          |         |          |          |          |          |         |            |
|------------------------------|----------|---------|----------|----------|----------|----------|---------|------------|
| gene:Sme2.5_05308.1_g00002.1 | 23.66    | 25.36   | 19.85    | 67.17    | 36.80    | 53.75    | -1.1952 | 0.0009666  |
| novel.1926                   | 48.23    | 77.96   | 75.61    | 198.27   | 110.40   | 152.99   | -1.1948 | 3.15E-05   |
| gene:Sme2.5_04917.1_g00004.1 | 21.84    | 17.85   | 26.47    | 65.01    | 34.64    | 51.68    | -1.1941 | 0.00155573 |
| gene:Sme2.5_01164.1_g00001.1 | 273.94   | 275.22  | 281.66   | 805.00   | 457.83   | 637.79   | -1.1939 | 3.27E-09   |
| gene:Sme2.5_03276.1_g00004.1 | 19744.40 | 6599.74 | 14063.33 | 38662.59 | 23242.32 | 30471.26 | -1.1929 | 0.0091913  |
| gene:Sme2.5_00058.1_g00005.1 | 49.14    | 105.21  | 68.05    | 198.27   | 142.87   | 166.42   | -1.1913 | 3.20E-05   |
| gene:Sme2.5_00068.1_g00008.1 | 40.95    | 57.30   | 42.53    | 125.68   | 66.02    | 129.21   | -1.1898 | 0.0001938  |
| gene:Sme2.5_02837.1_g00005.1 | 973.80   | 1569.62 | 1218.34  | 2711.85  | 2883.37  | 2984.28  | -1.1896 | 1.69E-12   |
| novel.251                    | 36.40    | 30.06   | 31.19    | 89.93    | 59.53    | 73.39    | -1.1894 | 6.36E-05   |
| gene:Sme2.5_00427.1_g00009.1 | 96.47    | 97.69   | 88.85    | 271.94   | 189.41   | 184.00   | -1.1886 | 3.85E-08   |
| gene:Sme2.5_01618.1_g00011.1 | 353.11   | 496.91  | 395.09   | 1197.20  | 720.84   | 918.95   | -1.1882 | 7.59E-09   |
| gene:Sme2.5_29676.1_g00001.1 | 2153.27  | 982.54  | 1700.38  | 3075.89  | 4230.89  | 3713.03  | -1.1881 | 1.00E-06   |
| gene:Sme2.5_11320.1_g00001.1 | 49.14    | 47.91   | 42.53    | 144.10   | 72.52    | 101.30   | -1.1870 | 8.75E-05   |
| gene:Sme2.5_00003.1_g00010.1 | 114.67   | 160.63  | 125.71   | 449.63   | 185.08   | 278.06   | -1.1867 | 7.23E-05   |
| gene:Sme2.5_00537.1_g00007.1 | 26.39    | 41.33   | 31.19    | 79.09    | 70.35    | 75.46    | -1.1863 | 4.21E-05   |
| novel.2304                   | 26.39    | 40.39   | 18.90    | 87.76    | 35.72    | 71.32    | -1.1852 | 0.00479852 |
| gene:Sme2.5_04435.1_g00004.1 | 48.23    | 39.45   | 36.86    | 120.26   | 60.61    | 102.34   | -1.1846 | 0.00018839 |
| gene:Sme2.5_00017.1_g00007.1 | 97.38    | 85.48   | 115.31   | 237.27   | 200.23   | 239.82   | -1.1842 | 7.02E-10   |
| gene:Sme2.5_00876.1_g00004.1 | 135.60   | 172.84  | 172.97   | 409.54   | 300.89   | 382.47   | -1.1835 | 1.36E-10   |
| gene:Sme2.5_00845.1_g00014.1 | 72.81    | 78.90   | 77.50    | 192.85   | 158.02   | 169.53   | -1.1831 | 1.52E-09   |
| gene:Sme2.5_07589.1_g00005.1 | 727.16   | 1357.33 | 983.93   | 2508.17  | 2156.03  | 2299.97  | -1.1826 | 5.01E-09   |
| gene:Sme2.5_05372.1_g00004.1 | 146.52   | 95.81   | 134.22   | 340.20   | 225.13   | 289.43   | -1.1823 | 1.57E-07   |
| gene:Sme2.5_02356.1_g00003.1 | 39.13    | 31.00   | 48.20    | 85.59    | 115.81   | 67.19    | -1.1818 | 0.00014162 |
| gene:Sme2.5_00747.1_g00008.1 | 28.21    | 17.85   | 18.90    | 70.42    | 37.88    | 39.28    | -1.1812 | 0.00330028 |
| gene:Sme2.5_00022.1_g00024.1 | 19.11    | 29.12   | 22.68    | 48.75    | 48.71    | 63.06    | -1.1808 | 0.00049039 |
| gene:Sme2.5_03227.1_g00002.1 | 13.65    | 18.79   | 30.25    | 63.92    | 33.55    | 44.45    | -1.1808 | 0.00526867 |
| novel.1348                   | 49.14    | 46.97   | 24.57    | 104.01   | 86.59    | 82.70    | -1.1774 | 0.00013122 |
| novel.1915                   | 59.16    | 57.30   | 48.20    | 113.76   | 145.03   | 113.71   | -1.1767 | 5.32E-07   |
| gene:Sme2.5_02308.1_g00005.1 | 109.21   | 127.75  | 136.11   | 352.12   | 188.33   | 301.84   | -1.1754 | 1.48E-06   |
| novel.1645                   | 20.02    | 17.85   | 28.36    | 70.42    | 32.47    | 46.52    | -1.1743 | 0.00379498 |

|                              |          |         |         |          |          |          |         |            |
|------------------------------|----------|---------|---------|----------|----------|----------|---------|------------|
| gene:Sme2.5_03239.1_g00002.1 | 57.34    | 73.27   | 78.45   | 175.52   | 133.13   | 162.29   | -1.1728 | 1.63E-07   |
| gene:Sme2.5_08853.1_g00001.1 | 109.21   | 134.32  | 118.15  | 367.29   | 189.41   | 258.42   | -1.1724 | 2.86E-06   |
| gene:Sme2.5_00414.1_g00004.1 | 963.79   | 1061.44 | 1040.64 | 2893.87  | 1693.87  | 2321.68  | -1.1723 | 1.51E-10   |
| gene:Sme2.5_00528.1_g00026.1 | 69.17    | 81.72   | 86.96   | 252.44   | 113.65   | 169.53   | -1.1714 | 6.76E-05   |
| gene:Sme2.5_03640.1_g00003.1 | 38.22    | 27.24   | 30.25   | 88.84    | 66.02    | 60.99    | -1.1712 | 0.00013564 |
| novel.3                      | 10090.17 | 4748.32 | 7886.58 | 18692.61 | 15640.99 | 16819.25 | -1.1705 | 2.16E-07   |
| gene:Sme2.5_07180.1_g00001.1 | 20.02    | 16.91   | 12.29   | 39.00    | 36.80    | 35.15    | -1.1704 | 0.00259345 |
| gene:Sme2.5_06561.1_g00003.1 | 150.16   | 152.17  | 148.39  | 384.62   | 252.19   | 377.30   | -1.1702 | 3.49E-09   |
| novel.2941                   | 16.38    | 13.15   | 19.85   | 40.09    | 38.96    | 32.04    | -1.1692 | 0.00264738 |
| novel.371                    | 72.81    | 62.94   | 84.12   | 153.85   | 188.33   | 151.95   | -1.1681 | 4.76E-08   |
| novel.2607                   | 78.27    | 78.90   | 56.71   | 172.27   | 177.50   | 131.28   | -1.1680 | 4.61E-07   |
| gene:Sme2.5_00317.1_g00006.1 | 109.21   | 116.48  | 132.33  | 297.95   | 273.83   | 232.58   | -1.1678 | 8.16E-11   |
| gene:Sme2.5_00006.1_g00023.1 | 20.93    | 12.21   | 16.07   | 42.25    | 25.98    | 42.38    | -1.1676 | 0.00538681 |
| gene:Sme2.5_00754.1_g00011.1 | 157.45   | 122.11  | 137.05  | 405.21   | 205.65   | 324.58   | -1.1667 | 3.23E-06   |
| gene:Sme2.5_09007.1_g00001.1 | 22.75    | 23.48   | 16.07   | 53.09    | 47.62    | 39.28    | -1.1660 | 0.00104398 |
| gene:Sme2.5_05069.1_g00005.1 | 36.40    | 23.48   | 31.19   | 93.18    | 35.72    | 75.46    | -1.1655 | 0.00333528 |
| gene:Sme2.5_09386.1_g00002.1 | 10.01    | 22.54   | 23.63   | 30.34    | 49.79    | 45.48    | -1.1638 | 0.00678021 |
| gene:Sme2.5_30177.1_g00001.1 | 383.15   | 471.54  | 447.07  | 1356.47  | 626.68   | 932.39   | -1.1634 | 1.76E-06   |
| gene:Sme2.5_00188.1_g00020.1 | 70.08    | 99.57   | 87.90   | 282.78   | 95.25    | 198.47   | -1.1628 | 0.00083343 |
| novel.2509                   | 12.74    | 15.03   | 14.18   | 29.25    | 28.14    | 36.18    | -1.1593 | 0.00500293 |
| novel.2404                   | 53.70    | 60.12   | 59.55   | 170.10   | 90.92    | 126.11   | -1.1593 | 2.70E-05   |
| gene:Sme2.5_08941.1_g00002.1 | 131.96   | 140.90  | 150.28  | 359.70   | 269.50   | 315.28   | -1.1587 | 2.31E-11   |
| gene:Sme2.5_03435.1_g00005.1 | 40.95    | 80.78   | 63.33   | 158.18   | 117.98   | 136.45   | -1.1580 | 2.84E-05   |
| gene:Sme2.5_03129.1_g00008.1 | 26.39    | 35.69   | 30.25   | 81.26    | 60.61    | 64.09    | -1.1579 | 0.0001149  |
| gene:Sme2.5_05075.1_g00002.1 | 93.74    | 110.84  | 106.81  | 264.36   | 211.06   | 218.11   | -1.1555 | 4.37E-10   |
| gene:Sme2.5_07626.1_g00003.1 | 630.69   | 778.71  | 677.69  | 2039.04  | 1071.52  | 1537.10  | -1.1551 | 6.17E-08   |
| gene:Sme2.5_00077.1_g00014.1 | 91.92    | 62.00   | 80.34   | 232.94   | 126.63   | 162.29   | -1.1549 | 2.49E-05   |
| gene:Sme2.5_00714.1_g00019.1 | 56.43    | 74.21   | 66.16   | 193.94   | 108.23   | 135.41   | -1.1532 | 1.98E-05   |
| gene:Sme2.5_09817.1_g00002.1 | 31.85    | 29.12   | 34.03   | 111.59   | 32.47    | 67.19    | -1.1529 | 0.00691842 |
| gene:Sme2.5_04169.1_g00002.1 | 734.44   | 832.25  | 721.17  | 1857.02  | 1477.40  | 1749.01  | -1.1519 | 4.10E-19   |

|                              |         |         |         |         |         |         |         |            |
|------------------------------|---------|---------|---------|---------|---------|---------|---------|------------|
| gene:Sme2.5_03274.1_g00007.1 | 407.72  | 199.14  | 332.70  | 857.00  | 474.07  | 756.66  | -1.1517 | 2.73E-05   |
| gene:Sme2.5_01647.1_g00001.1 | 252.09  | 331.58  | 281.66  | 831.00  | 489.22  | 601.61  | -1.1512 | 3.74E-08   |
| novel.2293                   | 48.23   | 59.18   | 59.55   | 138.68  | 114.73  | 116.81  | -1.1495 | 5.03E-07   |
| gene:Sme2.5_00021.1_g00020.1 | 41.86   | 27.24   | 47.26   | 136.51  | 36.80   | 84.76   | -1.1490 | 0.0094081  |
| novel.1717                   | 111.03  | 86.42   | 96.41   | 209.10  | 231.62  | 210.87  | -1.1480 | 3.18E-10   |
| gene:Sme2.5_01918.1_g00005.1 | 668.92  | 810.64  | 764.65  | 1611.08 | 1779.38 | 1577.42 | -1.1466 | 3.22E-22   |
| gene:Sme2.5_03712.1_g00005.1 | 186.57  | 216.99  | 198.49  | 579.64  | 317.13  | 435.19  | -1.1457 | 2.02E-07   |
| novel.1850                   | 1264.11 | 1271.85 | 1073.72 | 3646.86 | 1785.87 | 2534.62 | -1.1422 | 3.09E-07   |
| gene:Sme2.5_01435.1_g00006.1 | 30.03   | 21.60   | 18.90   | 74.76   | 31.39   | 49.62   | -1.1412 | 0.00557087 |
| gene:Sme2.5_11401.1_g00002.1 | 42.77   | 57.30   | 46.31   | 163.60  | 69.27   | 89.93   | -1.1407 | 0.0009695  |
| gene:Sme2.5_23081.1_g00001.1 | 79.18   | 88.30   | 119.09  | 260.03  | 163.43  | 207.77  | -1.1400 | 2.82E-06   |
| gene:Sme2.5_00188.1_g00010.1 | 167.46  | 243.29  | 203.21  | 553.64  | 330.12  | 468.26  | -1.1393 | 2.85E-07   |
| gene:Sme2.5_06009.1_g00002.1 | 58.25   | 47.91   | 61.44   | 123.51  | 133.13  | 112.67  | -1.1393 | 5.03E-07   |
| gene:Sme2.5_01284.1_g00016.1 | 40.04   | 54.48   | 65.22   | 158.18  | 94.16   | 99.23   | -1.1387 | 0.00014481 |
| gene:Sme2.5_01002.1_g00008.1 | 61.89   | 46.03   | 45.37   | 127.85  | 92.00   | 117.84  | -1.1385 | 9.22E-06   |
| gene:Sme2.5_02193.1_g00005.1 | 347.65  | 332.52  | 428.17  | 941.51  | 724.09  | 771.14  | -1.1366 | 8.72E-13   |
| gene:Sme2.5_02319.1_g00006.1 | 31.85   | 31.00   | 31.19   | 92.09   | 43.29   | 71.32   | -1.1363 | 0.00101777 |
| gene:Sme2.5_01657.1_g00003.1 | 57.34   | 72.33   | 81.29   | 232.94  | 89.83   | 140.58  | -1.1355 | 0.00073973 |
| gene:Sme2.5_03129.1_g00010.1 | 232.98  | 232.01  | 258.98  | 691.24  | 363.67  | 535.45  | -1.1354 | 3.40E-07   |
| gene:Sme2.5_00926.1_g00007.1 | 167.46  | 157.81  | 178.64  | 533.05  | 205.65  | 368.00  | -1.1350 | 9.71E-05   |
| gene:Sme2.5_00163.1_g00004.1 | 26.39   | 34.76   | 30.25   | 73.67   | 64.94   | 62.02   | -1.1348 | 0.00010129 |
| gene:Sme2.5_02309.1_g00006.1 | 71.90   | 138.08  | 120.98  | 333.70  | 150.45  | 241.88  | -1.1340 | 0.00035938 |
| gene:Sme2.5_03383.1_g00002.1 | 568.81  | 695.10  | 644.61  | 1783.34 | 1036.89 | 1367.58 | -1.1338 | 4.78E-09   |
| gene:Sme2.5_08525.1_g00003.1 | 9.10    | 22.54   | 17.01   | 43.34   | 27.06   | 36.18   | -1.1337 | 0.01116698 |
| gene:Sme2.5_01085.1_g00005.1 | 1303.25 | 1388.33 | 1411.15 | 3562.35 | 2493.73 | 2942.93 | -1.1332 | 3.09E-15   |
| gene:Sme2.5_00085.1_g00036.1 | 549.69  | 349.43  | 448.02  | 1158.20 | 798.77  | 997.52  | -1.1328 | 8.74E-09   |
| gene:Sme2.5_01766.1_g00005.1 | 66.44   | 67.63   | 71.83   | 223.19  | 83.34   | 144.72  | -1.1320 | 0.00061924 |
| gene:Sme2.5_00098.1_g00006.1 | 300.33  | 335.34  | 313.80  | 816.91  | 501.13  | 760.80  | -1.1308 | 3.78E-09   |
| novel.1643                   | 518.75  | 553.27  | 489.60  | 1544.99 | 805.27  | 1067.81 | -1.1301 | 1.45E-07   |
| novel.319                    | 84.64   | 141.84  | 118.15  | 215.60  | 311.72  | 226.38  | -1.1295 | 2.39E-06   |

|                              |         |         |         |         |         |         |         |            |
|------------------------------|---------|---------|---------|---------|---------|---------|---------|------------|
| gene:Sme2.5_10970.1_g00001.1 | 44.59   | 57.30   | 56.71   | 169.02  | 95.25   | 82.70   | -1.1291 | 0.00037665 |
| novel.213                    | 18.20   | 16.91   | 18.90   | 39.00   | 33.55   | 45.48   | -1.1289 | 0.00231553 |
| gene:Sme2.5_00003.1_g00016.1 | 21.84   | 45.09   | 19.85   | 72.59   | 50.87   | 66.16   | -1.1286 | 0.0029112  |
| gene:Sme2.5_03809.1_g00005.1 | 24.57   | 30.06   | 22.68   | 54.17   | 64.94   | 49.62   | -1.1253 | 0.00044462 |
| gene:Sme2.5_00377.1_g00004.1 | 29.12   | 19.73   | 27.41   | 48.75   | 66.02   | 51.68   | -1.1250 | 0.00069734 |
| gene:Sme2.5_25781.1_g00001.1 | 500.55  | 636.87  | 637.05  | 1590.49 | 917.83  | 1355.17 | -1.1227 | 3.05E-08   |
| gene:Sme2.5_00048.1_g00011.1 | 139.24  | 182.23  | 151.23  | 328.28  | 360.42  | 340.09  | -1.1224 | 3.51E-12   |
| novel.275                    | 779.04  | 769.31  | 627.60  | 2199.39 | 1045.55 | 1490.59 | -1.1218 | 1.86E-06   |
| gene:Sme2.5_00010.1_g00017.1 | 80.09   | 88.30   | 70.89   | 205.85  | 143.95  | 170.56  | -1.1207 | 2.81E-07   |
| gene:Sme2.5_00661.1_g00001.1 | 168.37  | 222.62  | 207.94  | 559.06  | 336.61  | 405.21  | -1.1192 | 1.75E-07   |
| gene:Sme2.5_00136.1_g00025.1 | 37.31   | 18.79   | 23.63   | 65.01   | 42.21   | 66.16   | -1.1192 | 0.00250287 |
| gene:Sme2.5_01898.1_g00004.1 | 38.22   | 62.94   | 46.31   | 124.60  | 90.92   | 104.40  | -1.1182 | 4.26E-05   |
| gene:Sme2.5_00061.1_g00013.1 | 646.16  | 751.46  | 682.42  | 1682.58 | 1321.55 | 1509.19 | -1.1177 | 1.23E-17   |
| gene:Sme2.5_00081.1_g00006.1 | 392.25  | 286.50  | 344.99  | 887.34  | 600.70  | 732.89  | -1.1171 | 1.21E-09   |
| gene:Sme2.5_00281.1_g00004.1 | 92.83   | 95.81   | 93.57   | 305.53  | 102.82  | 202.60  | -1.1143 | 0.0008676  |
| gene:Sme2.5_05529.1_g00003.1 | 65.53   | 120.23  | 73.72   | 230.77  | 161.27  | 169.53  | -1.1142 | 4.02E-05   |
| gene:Sme2.5_02761.1_g00007.1 | 127.41  | 173.78  | 162.57  | 408.46  | 241.36  | 353.52  | -1.1139 | 8.64E-07   |
| novel.1251                   | 55.52   | 63.87   | 57.66   | 159.27  | 101.74  | 121.98  | -1.1132 | 7.76E-06   |
| gene:Sme2.5_04699.1_g00003.1 | 46.41   | 70.45   | 70.89   | 197.19  | 64.94   | 143.68  | -1.1127 | 0.00303405 |
| novel.548                    | 549.69  | 846.34  | 680.53  | 1665.25 | 1342.11 | 1482.32 | -1.1126 | 7.53E-11   |
| gene:Sme2.5_09638.1_g00002.1 | 20.02   | 27.24   | 21.74   | 60.67   | 34.64   | 53.75   | -1.1123 | 0.00232794 |
| gene:Sme2.5_12867.1_g00001.1 | 18.20   | 21.60   | 28.36   | 71.51   | 29.22   | 46.52   | -1.1121 | 0.00789616 |
| gene:Sme2.5_00446.1_g00015.1 | 46.41   | 36.63   | 50.09   | 128.93  | 60.61   | 98.20   | -1.1118 | 0.00062944 |
| novel.1067                   | 338.55  | 413.31  | 368.62  | 982.68  | 601.78  | 835.23  | -1.1109 | 5.07E-09   |
| gene:Sme2.5_02223.1_g00002.1 | 112.85  | 96.75   | 110.59  | 303.36  | 172.09  | 216.04  | -1.1105 | 2.81E-06   |
| novel.2275                   | 84.64   | 102.39  | 87.90   | 209.10  | 195.90  | 188.13  | -1.1095 | 1.48E-09   |
| gene:Sme2.5_09126.1_g00003.1 | 21.84   | 17.85   | 30.25   | 72.59   | 41.13   | 37.21   | -1.1092 | 0.00571981 |
| gene:Sme2.5_01657.1_g00006.1 | 1764.66 | 2105.98 | 1794.90 | 4862.48 | 3324.97 | 4025.21 | -1.1081 | 1.01E-12   |
| gene:Sme2.5_00418.1_g00004.1 | 182.93  | 186.93  | 190.93  | 494.05  | 361.50  | 352.49  | -1.1069 | 3.95E-10   |
| gene:Sme2.5_03136.1_g00003.1 | 36.40   | 31.00   | 38.75   | 117.01  | 42.21   | 69.26   | -1.1056 | 0.004262   |

|                              |         |         |         |         |         |         |         |            |
|------------------------------|---------|---------|---------|---------|---------|---------|---------|------------|
| gene:Sme2.5_00612.1_g00008.1 | 580.64  | 428.33  | 483.93  | 1349.97 | 715.43  | 1141.20 | -1.1028 | 8.42E-07   |
| gene:Sme2.5_14392.1_g00002.1 | 19.11   | 15.97   | 14.18   | 44.42   | 34.64   | 26.88   | -1.1019 | 0.00684761 |
| gene:Sme2.5_04464.1_g00001.1 | 3201.70 | 3620.18 | 3451.80 | 8818.13 | 5896.63 | 7333.03 | -1.1017 | 4.78E-13   |
| gene:Sme2.5_07272.1_g00001.1 | 306.70  | 387.94  | 336.48  | 825.58  | 636.42  | 749.43  | -1.1010 | 7.06E-13   |
| gene:Sme2.5_00015.1_g00039.1 | 366.77  | 477.18  | 438.56  | 1209.12 | 587.71  | 951.00  | -1.0995 | 3.55E-06   |
| gene:Sme2.5_01689.1_g00003.1 | 39.13   | 46.97   | 35.92   | 121.35  | 58.45   | 81.66   | -1.0993 | 0.0008088  |
| gene:Sme2.5_01024.1_g00004.1 | 34.58   | 29.12   | 26.47   | 53.09   | 81.18   | 58.92   | -1.0978 | 0.000539   |
| gene:Sme2.5_06629.1_g00003.1 | 295.78  | 338.16  | 316.64  | 645.73  | 763.05  | 625.39  | -1.0976 | 1.28E-15   |
| gene:Sme2.5_01071.1_g00010.1 | 55.52   | 61.06   | 59.55   | 136.51  | 98.49   | 141.62  | -1.0975 | 4.43E-06   |
| gene:Sme2.5_02712.1_g00004.1 | 70.08   | 80.78   | 74.67   | 236.19  | 87.67   | 158.16  | -1.0959 | 0.00084699 |
| gene:Sme2.5_00294.1_g00010.1 | 763.57  | 912.09  | 770.32  | 2111.63 | 1378.91 | 1730.41 | -1.0939 | 9.58E-11   |
| novel.2346                   | 63.71   | 87.36   | 67.11   | 152.77  | 121.22  | 191.23  | -1.0938 | 1.06E-05   |
| gene:Sme2.5_16135.1_g00001.1 | 23.66   | 26.30   | 19.85   | 46.59   | 44.38   | 57.89   | -1.0931 | 0.00115264 |
| gene:Sme2.5_02743.1_g00004.1 | 78.27   | 92.99   | 69.94   | 166.85  | 181.83  | 165.39  | -1.0915 | 4.21E-08   |
| gene:Sme2.5_00187.1_g00015.1 | 116.49  | 96.75   | 95.46   | 227.52  | 192.66  | 237.75  | -1.0914 | 5.76E-09   |
| gene:Sme2.5_06715.1_g00004.1 | 31.85   | 27.24   | 27.41   | 53.09   | 69.27   | 62.02   | -1.0912 | 0.00030348 |
| novel.1328                   | 10.92   | 30.06   | 19.85   | 54.17   | 38.96   | 36.18   | -1.0896 | 0.01135649 |
| gene:Sme2.5_04702.1_g00006.1 | 11.83   | 32.88   | 17.01   | 33.59   | 51.95   | 45.48   | -1.0880 | 0.01327536 |
| gene:Sme2.5_05657.1_g00005.1 | 181.11  | 262.07  | 188.09  | 494.05  | 428.61  | 418.65  | -1.0875 | 1.74E-09   |
| gene:Sme2.5_00505.1_g00013.1 | 30.03   | 21.60   | 30.25   | 49.84   | 62.78   | 60.99   | -1.0840 | 0.00062212 |
| gene:Sme2.5_01441.1_g00007.1 | 653.44  | 610.57  | 342.16  | 1568.82 | 797.69  | 1037.83 | -1.0836 | 8.42E-05   |
| gene:Sme2.5_00787.1_g00007.1 | 197.49  | 269.59  | 226.84  | 598.06  | 398.30  | 473.43  | -1.0830 | 2.56E-08   |
| gene:Sme2.5_03981.1_g00003.1 | 152.90  | 113.66  | 106.81  | 295.78  | 242.45  | 253.26  | -1.0829 | 3.33E-08   |
| gene:Sme2.5_01759.1_g00005.1 | 96.47   | 99.57   | 105.86  | 237.27  | 179.67  | 222.24  | -1.0826 | 1.11E-08   |
| novel.1956                   | 13.65   | 16.91   | 18.90   | 30.34   | 43.29   | 31.01   | -1.0817 | 0.00700402 |
| gene:Sme2.5_05276.1_g00003.1 | 71.90   | 92.99   | 69.94   | 206.94  | 125.55  | 164.36  | -1.0813 | 1.35E-05   |
| gene:Sme2.5_00276.1_g00004.1 | 469.61  | 507.24  | 433.84  | 1292.55 | 711.10  | 978.91  | -1.0801 | 1.36E-07   |
| gene:Sme2.5_02876.1_g00009.1 | 37.31   | 38.51   | 49.15   | 105.09  | 62.78   | 96.13   | -1.0800 | 0.00027359 |
| gene:Sme2.5_04205.1_g00006.1 | 40.04   | 43.21   | 51.04   | 128.93  | 62.78   | 92.00   | -1.0794 | 0.00064864 |
| gene:Sme2.5_04119.1_g00002.1 | 932.84  | 1271.85 | 1017.01 | 2400.91 | 2013.17 | 2393.00 | -1.0793 | 1.77E-13   |

|                              |         |         |         |          |         |          |         |            |
|------------------------------|---------|---------|---------|----------|---------|----------|---------|------------|
| gene:Sme2.5_01688.1_g00003.1 | 63.71   | 54.48   | 69.00   | 185.27   | 67.11   | 142.65   | -1.0776 | 0.00188306 |
| novel.2456                   | 440.48  | 447.12  | 461.25  | 1144.11  | 733.83  | 968.57   | -1.0775 | 2.51E-10   |
| gene:Sme2.5_01441.1_g00002.1 | 141.06  | 176.59  | 130.43  | 397.62   | 245.69  | 301.84   | -1.0767 | 9.39E-07   |
| gene:Sme2.5_02740.1_g00011.1 | 38.22   | 42.27   | 44.42   | 100.76   | 75.76   | 86.83    | -1.0765 | 3.68E-05   |
| gene:Sme2.5_12667.1_g00002.1 | 52.79   | 50.72   | 66.16   | 128.93   | 95.25   | 133.35   | -1.0764 | 1.44E-05   |
| novel.835                    | 258.47  | 283.68  | 277.88  | 606.73   | 582.30  | 539.59   | -1.0759 | 1.51E-17   |
| gene:Sme2.5_00779.1_g00017.1 | 153.81  | 200.08  | 167.30  | 419.29   | 322.54  | 355.59   | -1.0745 | 8.47E-10   |
| gene:Sme2.5_00009.1_g00007.1 | 81.00   | 94.87   | 102.08  | 250.27   | 128.80  | 205.71   | -1.0736 | 4.57E-05   |
| gene:Sme2.5_00326.1_g00015.1 | 55.52   | 69.51   | 62.38   | 130.01   | 126.63  | 137.48   | -1.0735 | 4.93E-07   |
| gene:Sme2.5_08800.1_g00001.1 | 123.77  | 137.14  | 133.27  | 358.62   | 186.16  | 282.20   | -1.0692 | 9.67E-06   |
| gene:Sme2.5_05409.1_g00001.1 | 129.23  | 101.45  | 127.60  | 307.70   | 202.40  | 240.85   | -1.0673 | 5.00E-07   |
| gene:Sme2.5_00194.1_g00002.1 | 23.66   | 31.00   | 27.41   | 61.76    | 59.53   | 50.65    | -1.0671 | 0.00057939 |
| gene:Sme2.5_00787.1_g00010.1 | 353.11  | 354.13  | 327.98  | 749.74   | 744.65  | 675.00   | -1.0670 | 2.15E-19   |
| gene:Sme2.5_00852.1_g00005.1 | 19.11   | 44.15   | 59.55   | 107.26   | 63.86   | 85.80    | -1.0667 | 0.00685176 |
| gene:Sme2.5_00127.1_g00020.1 | 34.58   | 36.63   | 41.59   | 93.18    | 81.18   | 62.02    | -1.0666 | 0.00018756 |
| gene:Sme2.5_03302.1_g00002.1 | 20.02   | 30.06   | 23.63   | 44.42    | 48.71   | 60.99    | -1.0663 | 0.00172723 |
| gene:Sme2.5_07159.1_g00004.1 | 686.21  | 504.42  | 593.57  | 1432.31  | 1069.36 | 1234.23  | -1.0660 | 3.31E-11   |
| gene:Sme2.5_02982.1_g00007.1 | 4806.18 | 6422.21 | 5389.42 | 15185.51 | 7825.37 | 11774.82 | -1.0658 | 8.03E-07   |
| gene:Sme2.5_21630.1_g00001.1 | 1371.51 | 1403.36 | 1193.76 | 2742.19  | 2875.80 | 2679.34  | -1.0639 | 2.03E-24   |
| gene:Sme2.5_14136.1_g00002.1 | 1744.64 | 1796.00 | 1827.03 | 5055.34  | 2567.33 | 3595.19  | -1.0634 | 3.71E-07   |
| gene:Sme2.5_04615.1_g00008.1 | 273.94  | 321.25  | 279.77  | 755.16   | 454.59  | 618.15   | -1.0630 | 5.25E-08   |
| gene:Sme2.5_00045.1_g00028.1 | 106.48  | 154.05  | 144.61  | 222.11   | 391.81  | 231.55   | -1.0615 | 4.14E-05   |
| novel.1826                   | 12.74   | 16.91   | 17.96   | 34.67    | 33.55   | 31.01    | -1.0608 | 0.00736589 |
| gene:Sme2.5_10131.1_g00003.1 | 31.85   | 28.18   | 33.08   | 76.92    | 56.28   | 60.99    | -1.0599 | 0.00038702 |
| gene:Sme2.5_02596.1_g00001.1 | 68.26   | 95.81   | 73.72   | 202.60   | 116.89  | 175.73   | -1.0590 | 5.05E-05   |
| gene:Sme2.5_03830.1_g00001.1 | 79.18   | 92.99   | 75.61   | 166.85   | 153.69  | 195.37   | -1.0588 | 2.03E-07   |
| gene:Sme2.5_00048.1_g00022.1 | 1917.56 | 2188.64 | 1985.82 | 4342.43  | 4093.44 | 4253.65  | -1.0587 | 4.06E-29   |
| gene:Sme2.5_00999.1_g00001.1 | 31.85   | 46.03   | 32.14   | 108.34   | 41.13   | 79.59    | -1.0585 | 0.00575722 |
| gene:Sme2.5_00141.1_g00003.1 | 240.26  | 419.88  | 306.24  | 396.54   | 947.05  | 668.80   | -1.0584 | 0.00031534 |
| novel.2385                   | 28.21   | 23.48   | 41.59   | 70.42    | 61.69   | 62.02    | -1.0581 | 0.00082229 |

|                              |         |         |         |         |         |         |         |            |
|------------------------------|---------|---------|---------|---------|---------|---------|---------|------------|
| gene:Sme2.5_00699.1_g00001.1 | 66.44   | 44.15   | 60.49   | 136.51  | 110.40  | 109.57  | -1.0580 | 1.91E-05   |
| gene:Sme2.5_00140.1_g00015.1 | 384.06  | 344.73  | 378.07  | 846.17  | 690.54  | 767.00  | -1.0574 | 5.79E-16   |
| gene:Sme2.5_00372.1_g00007.1 | 158.36  | 118.36  | 142.72  | 325.03  | 227.29  | 320.45  | -1.0570 | 2.27E-07   |
| novel.1228                   | 455.04  | 558.90  | 472.59  | 1335.88 | 681.88  | 1072.98 | -1.0561 | 2.27E-06   |
| gene:Sme2.5_07918.1_g00001.1 | 286.68  | 304.34  | 265.60  | 580.72  | 606.11  | 594.37  | -1.0561 | 7.20E-18   |
| gene:Sme2.5_06172.1_g00002.1 | 130.14  | 157.81  | 156.90  | 383.54  | 212.14  | 328.71  | -1.0556 | 5.54E-06   |
| gene:Sme2.5_00125.1_g00019.1 | 24.57   | 34.76   | 29.30   | 85.59   | 29.22   | 69.26   | -1.0554 | 0.01127733 |
| gene:Sme2.5_00414.1_g00008.1 | 32.76   | 44.15   | 51.98   | 124.60  | 56.28   | 86.83   | -1.0553 | 0.00228224 |
| gene:Sme2.5_00166.1_g00028.1 | 37.31   | 20.67   | 28.36   | 61.76   | 69.27   | 48.58   | -1.0542 | 0.00178542 |
| novel.3111                   | 26.39   | 38.51   | 19.85   | 54.17   | 64.94   | 56.85   | -1.0538 | 0.00176061 |
| gene:Sme2.5_30564.1_g00001.1 | 10.01   | 20.67   | 19.85   | 42.25   | 29.22   | 33.08   | -1.0515 | 0.01371064 |
| novel.1281                   | 1582.65 | 1844.85 | 1772.21 | 4189.67 | 2945.07 | 3638.61 | -1.0510 | 8.01E-13   |
| gene:Sme2.5_04032.1_g00004.1 | 85.55   | 107.08  | 92.63   | 279.53  | 112.56  | 198.47  | -1.0500 | 0.00060901 |
| novel.290                    | 62.80   | 145.60  | 75.61   | 187.44  | 211.06  | 189.17  | -1.0497 | 0.00038154 |
| gene:Sme2.5_00341.1_g00016.1 | 95.56   | 108.96  | 90.74   | 212.35  | 201.32  | 197.44  | -1.0493 | 3.67E-09   |
| gene:Sme2.5_00002.1_g00007.1 | 601.57  | 676.32  | 623.82  | 1560.15 | 1044.46 | 1330.37 | -1.0491 | 5.98E-11   |
| gene:Sme2.5_00029.1_g00001.1 | 140.15  | 179.41  | 174.86  | 436.63  | 242.45  | 343.19  | -1.0483 | 5.29E-06   |
| gene:Sme2.5_10251.1_g00002.1 | 274.85  | 282.74  | 258.98  | 527.64  | 601.78  | 558.20  | -1.0472 | 2.12E-16   |
| gene:Sme2.5_03209.1_g00007.1 | 42.77   | 63.87   | 59.55   | 153.85  | 70.35   | 118.87  | -1.0465 | 0.00120499 |
| gene:Sme2.5_08226.1_g00002.1 | 69.17   | 80.78   | 59.55   | 176.60  | 106.07  | 149.89  | -1.0460 | 4.50E-05   |
| novel.116                    | 60.07   | 61.06   | 52.93   | 127.85  | 114.73  | 116.81  | -1.0455 | 1.72E-06   |
| gene:Sme2.5_10607.1_g00002.1 | 31.85   | 35.69   | 46.31   | 107.26  | 50.87   | 76.49   | -1.0438 | 0.00232836 |
| gene:Sme2.5_09587.1_g00001.1 | 134.69  | 127.75  | 113.42  | 328.28  | 177.50  | 268.76  | -1.0430 | 1.27E-05   |
| gene:Sme2.5_00317.1_g00008.1 | 20.93   | 29.12   | 16.07   | 42.25   | 42.21   | 51.68   | -1.0429 | 0.00417922 |
| gene:Sme2.5_03788.1_g00002.1 | 25.48   | 22.54   | 17.01   | 48.75   | 33.55   | 51.68   | -1.0424 | 0.00465368 |
| gene:Sme2.5_02536.1_g00010.1 | 15.47   | 23.48   | 28.36   | 53.09   | 34.64   | 50.65   | -1.0422 | 0.0058662  |
| gene:Sme2.5_08823.1_g00001.1 | 17.29   | 16.91   | 15.12   | 45.50   | 30.31   | 25.84   | -1.0414 | 0.01229008 |
| gene:Sme2.5_01186.1_g00006.1 | 754.46  | 750.53  | 752.36  | 1861.35 | 1224.13 | 1555.71 | -1.0399 | 5.86E-11   |
| gene:Sme2.5_01346.1_g00006.1 | 50.05   | 65.75   | 65.22   | 163.60  | 80.09   | 127.14  | -1.0353 | 0.00052357 |
| novel.990                    | 214.78  | 248.92  | 260.87  | 491.88  | 503.29  | 488.94  | -1.0349 | 1.73E-14   |

|                              |          |          |          |          |          |          |         |            |
|------------------------------|----------|----------|----------|----------|----------|----------|---------|------------|
| gene:Sme2.5_00699.1_g00003.1 | 3461.98  | 3792.08  | 3459.36  | 8711.95  | 5864.16  | 7360.94  | -1.0340 | 5.28E-12   |
| gene:Sme2.5_09640.1_g00002.1 | 61.89    | 68.57    | 66.16    | 146.26   | 106.07   | 149.89   | -1.0335 | 7.41E-06   |
| gene:Sme2.5_05275.1_g00001.1 | 115.58   | 125.87   | 123.82   | 360.79   | 168.85   | 218.11   | -1.0334 | 0.00013967 |
| gene:Sme2.5_00676.1_g00016.1 | 61.89    | 75.15    | 63.33    | 161.43   | 90.92    | 157.12   | -1.0319 | 0.00015025 |
| gene:Sme2.5_00398.1_g00018.1 | 175.65   | 206.65   | 176.75   | 482.13   | 283.57   | 377.30   | -1.0319 | 9.82E-07   |
| gene:Sme2.5_03999.1_g00005.1 | 1091.20  | 1226.77  | 1122.87  | 2951.29  | 1703.61  | 2379.57  | -1.0317 | 3.16E-08   |
| gene:Sme2.5_03463.1_g00002.1 | 212.96   | 236.71   | 201.32   | 619.73   | 293.32   | 417.61   | -1.0313 | 3.55E-05   |
| gene:Sme2.5_00632.1_g00004.1 | 13966.24 | 11415.69 | 12645.56 | 31268.11 | 20658.75 | 25791.72 | -1.0312 | 1.08E-10   |
| gene:Sme2.5_02477.1_g00002.1 | 30.03    | 15.97    | 30.25    | 60.67    | 49.79    | 45.48    | -1.0308 | 0.00402706 |
| gene:Sme2.5_10973.1_g00002.1 | 80.09    | 77.03    | 69.94    | 161.43   | 150.45   | 151.95   | -1.0300 | 1.18E-07   |
| gene:Sme2.5_04581.1_g00013.1 | 49.14    | 52.60    | 70.89    | 159.27   | 62.78    | 130.25   | -1.0298 | 0.00302494 |
| gene:Sme2.5_07326.1_g00001.1 | 76.45    | 97.69    | 77.50    | 162.52   | 173.18   | 177.80   | -1.0296 | 1.67E-07   |
| gene:Sme2.5_11292.1_g00001.1 | 34.58    | 63.87    | 50.09    | 100.76   | 102.82   | 99.23    | -1.0289 | 0.00015828 |
| gene:Sme2.5_00507.1_g00012.1 | 50.05    | 39.45    | 60.49    | 144.10   | 59.53    | 102.34   | -1.0285 | 0.00306521 |
| gene:Sme2.5_11516.1_g00001.1 | 22.75    | 21.60    | 16.07    | 36.84    | 35.72    | 50.65    | -1.0283 | 0.00581137 |
| gene:Sme2.5_00007.1_g00007.1 | 373.14   | 309.04   | 324.20   | 829.92   | 556.33   | 665.70   | -1.0276 | 4.01E-09   |
| gene:Sme2.5_13194.1_g00002.1 | 38.22    | 34.76    | 27.41    | 61.76    | 75.76    | 67.19    | -1.0268 | 0.00039516 |
| gene:Sme2.5_02585.1_g00004.1 | 245.72   | 252.68   | 261.81   | 594.81   | 412.37   | 539.59   | -1.0250 | 9.13E-10   |
| novel.470                    | 17.29    | 26.30    | 27.41    | 60.67    | 44.38    | 39.28    | -1.0241 | 0.00486531 |
| gene:Sme2.5_00658.1_g00011.1 | 1895.72  | 2054.32  | 1948.02  | 4493.03  | 3171.28  | 4329.11  | -1.0240 | 2.31E-12   |
| gene:Sme2.5_00006.1_g00040.1 | 587.92   | 607.75   | 560.49   | 1435.56  | 957.88   | 1175.31  | -1.0230 | 1.62E-10   |
| gene:Sme2.5_00726.1_g00020.1 | 2395.36  | 2585.98  | 2337.43  | 6405.30  | 3386.66  | 5079.58  | -1.0229 | 3.65E-07   |
| gene:Sme2.5_04071.1_g00006.1 | 25.48    | 31.94    | 31.19    | 69.34    | 42.21    | 68.22    | -1.0222 | 0.00203494 |
| novel.1270                   | 30.03    | 29.12    | 22.68    | 63.92    | 46.54    | 55.82    | -1.0220 | 0.00143615 |
| gene:Sme2.5_05312.1_g00003.1 | 33.67    | 57.30    | 45.37    | 146.26   | 50.87    | 79.59    | -1.0216 | 0.01008276 |
| gene:Sme2.5_06694.1_g00008.1 | 30.03    | 30.06    | 24.57    | 72.59    | 50.87    | 48.58    | -1.0214 | 0.00171928 |
| gene:Sme2.5_01553.1_g00002.1 | 191.12   | 170.96   | 172.97   | 427.96   | 292.23   | 365.93   | -1.0212 | 1.71E-08   |
| gene:Sme2.5_17012.1_g00002.1 | 45.50    | 87.36    | 63.33    | 164.68   | 107.15   | 126.11   | -1.0212 | 0.00041971 |
| gene:Sme2.5_02055.1_g00009.1 | 289.41   | 294.01   | 258.03   | 609.98   | 491.39   | 605.75   | -1.0206 | 2.25E-12   |
| gene:Sme2.5_29896.1_g00001.1 | 181.11   | 185.05   | 192.82   | 474.55   | 288.99   | 370.06   | -1.0201 | 3.11E-07   |



|                              |         |         |         |         |         |         |         |            |
|------------------------------|---------|---------|---------|---------|---------|---------|---------|------------|
| gene:Sme2.5_06234.1_g00002.1 | 172.01  | 172.84  | 151.23  | 373.79  | 318.21  | 314.24  | -1.0198 | 8.87E-11   |
| gene:Sme2.5_04205.1_g00007.1 | 972.89  | 877.34  | 958.41  | 2264.39 | 1481.73 | 1948.51 | -1.0197 | 2.84E-10   |
| gene:Sme2.5_06367.1_g00006.1 | 61.89   | 77.03   | 80.34   | 71.51   | 247.86  | 125.08  | -1.0195 | 0.0086148  |
| gene:Sme2.5_06695.1_g00003.1 | 1826.55 | 2028.02 | 1978.26 | 4423.69 | 3482.99 | 3916.67 | -1.0194 | 1.22E-17   |
| gene:Sme2.5_03274.1_g00003.1 | 81.00   | 183.17  | 134.22  | 312.03  | 225.13  | 269.79  | -1.0191 | 0.00022254 |
| gene:Sme2.5_00830.1_g00010.1 | 38.22   | 46.03   | 45.37   | 107.26  | 72.52   | 82.70   | -1.0183 | 0.00019378 |
| gene:Sme2.5_00381.1_g00001.1 | 626.14  | 704.50  | 651.23  | 1595.91 | 1065.03 | 1351.04 | -1.0175 | 2.35E-10   |
| novel.1146                   | 623.41  | 874.52  | 778.83  | 1903.61 | 1144.04 | 1560.88 | -1.0174 | 3.33E-07   |
| gene:Sme2.5_03794.1_g00004.1 | 30.94   | 35.69   | 41.59   | 94.26   | 61.69   | 63.06   | -1.0171 | 0.00090326 |
| gene:Sme2.5_01603.1_g00009.1 | 22.75   | 21.60   | 23.63   | 52.01   | 41.13   | 44.45   | -1.0168 | 0.002487   |
| gene:Sme2.5_16449.1_g00001.1 | 143.79  | 152.17  | 140.83  | 278.44  | 320.37  | 284.27  | -1.0155 | 6.00E-11   |
| gene:Sme2.5_04555.1_g00002.1 | 32.76   | 40.39   | 29.30   | 85.59   | 58.45   | 63.06   | -1.0149 | 0.00086946 |
| gene:Sme2.5_01471.1_g00013.1 | 50.97   | 51.66   | 61.44   | 131.10  | 114.73  | 85.80   | -1.0146 | 7.43E-05   |
| gene:Sme2.5_00131.1_g00001.1 | 260.29  | 355.07  | 273.16  | 672.82  | 523.86  | 597.48  | -1.0141 | 2.12E-09   |
| gene:Sme2.5_03619.1_g00003.1 | 35.49   | 50.72   | 38.75   | 83.42   | 71.43   | 97.17   | -1.0136 | 0.00026331 |
| gene:Sme2.5_00029.1_g00027.1 | 266.66  | 294.95  | 298.68  | 652.23  | 479.48  | 604.71  | -1.0135 | 9.17E-11   |
| gene:Sme2.5_00098.1_g00004.1 | 37.31   | 28.18   | 23.63   | 66.09   | 53.03   | 60.99   | -1.0133 | 0.00129048 |
| gene:Sme2.5_07249.1_g00001.1 | 41.86   | 35.69   | 44.42   | 85.59   | 74.68   | 85.80   | -1.0126 | 9.71E-05   |
| gene:Sme2.5_00519.1_g00007.1 | 82.82   | 73.27   | 68.05   | 206.94  | 98.49   | 146.78  | -1.0121 | 0.00041186 |
| gene:Sme2.5_00864.1_g00009.1 | 78.27   | 71.39   | 86.96   | 160.35  | 173.18  | 143.68  | -1.0117 | 4.87E-07   |
| novel.942                    | 95.56   | 69.51   | 95.46   | 213.44  | 132.05  | 179.86  | -1.0116 | 3.56E-05   |
| gene:Sme2.5_01418.1_g00010.1 | 2517.31 | 2498.62 | 2482.04 | 6390.13 | 3749.25 | 4973.11 | -1.0112 | 1.18E-08   |
| gene:Sme2.5_11726.1_g00002.1 | 34.58   | 37.57   | 24.57   | 78.01   | 48.71   | 68.22   | -1.0106 | 0.00187863 |
| gene:Sme2.5_03307.1_g00003.1 | 1185.85 | 1146.92 | 1123.82 | 2716.19 | 1856.22 | 2385.77 | -1.0094 | 1.27E-11   |
| novel.1752                   | 71.90   | 102.39  | 103.02  | 126.76  | 230.54  | 200.54  | -1.0093 | 0.00015616 |
| gene:Sme2.5_00756.1_g00002.1 | 21.84   | 23.48   | 17.01   | 45.50   | 30.31   | 49.62   | -1.0092 | 0.00750794 |
| gene:Sme2.5_00505.1_g00018.1 | 45.50   | 52.60   | 70.89   | 137.60  | 82.26   | 119.91  | -1.0087 | 0.00041933 |
| gene:Sme2.5_00234.1_g00006.1 | 1748.28 | 1881.48 | 1886.58 | 4220.00 | 3244.88 | 3632.40 | -1.0084 | 2.29E-16   |
| gene:Sme2.5_00014.1_g00034.1 | 1434.30 | 1562.11 | 1469.75 | 3668.53 | 2360.60 | 2950.16 | -1.0076 | 4.16E-10   |
| gene:Sme2.5_01096.1_g00007.1 | 162.00  | 152.17  | 174.86  | 395.46  | 264.09  | 323.55  | -1.0074 | 9.96E-08   |

|                              |         |         |         |         |         |         |         |            |
|------------------------------|---------|---------|---------|---------|---------|---------|---------|------------|
| gene:Sme2.5_00479.1_g00009.1 | 67.35   | 71.39   | 60.49   | 187.44  | 71.43   | 141.62  | -1.0074 | 0.00240928 |
| gene:Sme2.5_03742.1_g00005.1 | 601.57  | 604.93  | 648.39  | 1704.25 | 860.47  | 1161.87 | -1.0065 | 4.21E-06   |
| gene:Sme2.5_01907.1_g00006.1 | 25.48   | 27.24   | 32.14   | 58.51   | 44.38   | 67.19   | -1.0049 | 0.00187456 |
| gene:Sme2.5_02353.1_g00005.1 | 30.03   | 32.88   | 52.93   | 101.84  | 48.71   | 81.66   | -1.0046 | 0.00557614 |
| gene:Sme2.5_03324.1_g00001.1 | 251.18  | 264.89  | 253.31  | 604.56  | 427.53  | 510.65  | -1.0037 | 5.58E-10   |
| gene:Sme2.5_01707.1_g00003.1 | 55.52   | 57.30   | 67.11   | 148.43  | 100.66  | 111.64  | -1.0037 | 4.67E-05   |
| gene:Sme2.5_04071.1_g00002.1 | 94.65   | 110.84  | 117.20  | 235.11  | 214.30  | 197.44  | -1.0035 | 3.47E-08   |
| gene:Sme2.5_14315.1_g00001.1 | 2090.48 | 2423.47 | 2229.68 | 4286.09 | 4528.54 | 4704.35 | -1.0035 | 5.59E-24   |
| gene:Sme2.5_03842.1_g00006.1 | 538.77  | 588.02  | 534.97  | 1340.22 | 874.54  | 1116.39 | -1.0033 | 1.57E-09   |
| gene:Sme2.5_03652.1_g00005.1 | 731.71  | 817.22  | 695.65  | 1886.27 | 1044.46 | 1563.98 | -1.0018 | 5.98E-07   |
| novel.2389                   | 15.47   | 22.54   | 26.47   | 45.50   | 37.88   | 45.48   | -1.0014 | 0.00587472 |
| gene:Sme2.5_08505.1_g00001.1 | 51.88   | 48.85   | 42.53   | 104.01  | 88.75   | 94.07   | -1.0008 | 3.72E-05   |
| gene:Sme2.5_00630.1_g00007.1 | 49.14   | 47.91   | 57.66   | 95.34   | 119.06  | 95.10   | -1.0004 | 3.73E-05   |
| gene:Sme2.5_08933.1_g00001.1 | 281.22  | 257.38  | 261.81  | 582.89  | 465.41  | 553.03  | -1.0004 | 2.17E-12   |

---
